# Supplementary material for: Catalytic dehydrogenative synthesis of α,β-unsaturated secondary amides without external oxidants
Source: Royal Society of Chemistry journal article supplement (doi:10.1039/d4sc04419c), 2024-01-01
Supplement: d4sc04419c1.pdf [file d4sc04419c1.pdf]

## *Supporting Information*

# **Catalytic Dehydrogenative Synthesis of $\alpha$ , $\beta$ - Unsaturated Secondary Amides without External Oxidants**

Shaokang An<sup>1</sup>, Guoyin Lai<sup>2</sup>, Wenbo H. Liu\*<sup>1</sup>

<sup>1</sup>School of Chemistry, Sun Yat-sen University, Guangzhou 510006, China

E-mail: liuwb29@mail.sysu.edu.cn.

<sup>2</sup>Guangzhou Flower Flavours & Fragrances Co., Ltd, Guangzhou 510442, China

## **Table of Contents**

|                                                                                                       |      |
|-------------------------------------------------------------------------------------------------------|------|
| 1. General information .....                                                                          | S2   |
| 2. Reaction optimization for the synthesis of $\alpha$ , $\beta$ - unsaturated secondary amides ..... | S3   |
| 3. Preparation and characterization of starting materials .....                                       | S7   |
| 4. General procedures for the synthesis of $\alpha$ , $\beta$ - unsaturated secondary amides .....    | S22  |
| 5. Scaled-up reaction.....                                                                            | S39  |
| 6. Derivatization to other compounds .....                                                            | S40  |
| 7. Synthesis of llepcimide .....                                                                      | S43  |
| 8. Reactivity of different leaving groups.....                                                        | S45  |
| 9. Potential intermediate for the dehydrogenation .....                                               | S46  |
| 10. Kinetic Isotope Effect Studies.....                                                               | S47  |
| 11. Copies of NMR spectra .....                                                                       | S51  |
| 12. References.....                                                                                   | S114 |

## 1. General information

Commercial reagents were purchased from Biomedical, TCI, J&K, Accela, Macklin, Bidepharm or Adamas and used without further purification. The anhydrous solvents used in the experiments were all purchased and used directly. All reactions were carried out with oven-dried glassware. Analytical thin layer chromatography (TLC) was performed on 0.20 mm silica gel HSGF-254 plates (Huanghai, China). Column chromatography was performed on 200-300 mesh silica gel or 300-400 mesh silica gel (General-Reagent, China).

$^1\text{H}$  NMR (400 MHz or 600 MHz),  $^{13}\text{C}$  NMR (101 MHz or 150 MHz) and  $^{19}\text{F}$  NMR (376 MHz or 565 MHz) were recorded on an NMR spectrometer (Bruker Ascend 400 M/600 M or Qone AS 400) with  $\text{CDCl}_3$  as the solvent. Chemical shifts of  $^1\text{H}$  and  $^{13}\text{C}$  NMR spectra are reported in parts per million (ppm). The residual solvent signals were used as references and the chemical shifts were converted to the TMS scale ( $\text{CDCl}_3$ :  $\delta$  H = 7.26 ppm,  $\delta$  C = 77.16 ppm). All coupling constants ( $J$  values) were reported in Hertz (Hz). The following abbreviations were used to explain the multiplicities: s = singlet, d = doublet, t = triplet, q = quartet, dd = doublet doublet, dt = doublet triplet, td = triplet doublet, m = multiplet, br = broad. High resolution mass spectrometer data of new compounds were recorded on an LTQ Orbitrap Elite LC/MS (ESI or APCI) or an MAT 95XP (Thermo, EI).

## 2. Reaction optimization for the synthesis of $\alpha, \beta$ - unsaturated secondary amides

**Table S1.** General screening for the one-step synthesis of  $\alpha, \beta$  - unsaturated secondary amides<sup>[a]</sup>

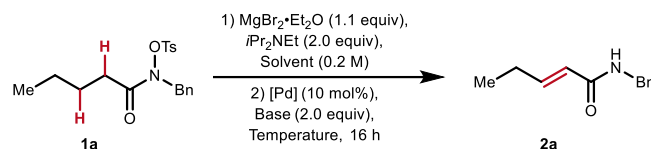

| Entry           | Pd                          | Base                     | Solvent | Temperature | Ligand                                             | <sup>1</sup> H-NMR Yield <sup>[b]</sup> |
|-----------------|-----------------------------|--------------------------|---------|-------------|----------------------------------------------------|-----------------------------------------|
| 1               | $\text{Pd}(\text{PPh}_3)_4$ | $\text{Cs}_2\text{CO}_3$ | MeCN    | 100 °C      | none                                               | 9%                                      |
| 2               | $\text{Pd}(\text{OAc})_2$   | $\text{Cs}_2\text{CO}_3$ | MeCN    | 100 °C      | 40 mol% $\text{PPh}_3$                             | 3%                                      |
| 3               | $\text{Pd}(\text{PPh}_3)_4$ | $\text{Cs}_2\text{CO}_3$ | DCE     | 100 °C      | none                                               | 4%                                      |
| 4               | $\text{Pd}(\text{PPh}_3)_4$ | $\text{Cs}_2\text{CO}_3$ | DMF     | 100 °C      | none                                               | N.R.                                    |
| 5               | $\text{Pd}(\text{PPh}_3)_4$ | $\text{Cs}_2\text{CO}_3$ | Dioxane | 100 °C      | none                                               | N.D.                                    |
| 6               | $\text{Pd}(\text{PPh}_3)_4$ | $\text{Cs}_2\text{CO}_3$ | DMSO    | 100 °C      | none                                               | N.D.                                    |
| 7               | $\text{Pd}(\text{PPh}_3)_4$ | $\text{Cs}_2\text{CO}_3$ | PhMe    | 100 °C      | none                                               | 2%                                      |
| 8               | $\text{Pd}(\text{PPh}_3)_4$ | $\text{Cs}_2\text{CO}_3$ | PhH     | 100 °C      | none                                               | 3%                                      |
| 9               | $\text{Pd}(\text{PPh}_3)_4$ | $\text{Cs}_2\text{CO}_3$ | PhCl    | 100 °C      | none                                               | 7%                                      |
| 10              | $\text{Pd}(\text{PPh}_3)_4$ | $i\text{Pr}_2\text{NEt}$ | MeCN    | 100 °C      | none                                               | 12 %                                    |
| 11              | $\text{Pd}(\text{PPh}_3)_4$ | $i\text{Pr}_2\text{NEt}$ | MeCN    | 100 °C      | 40 mol% $\text{P}(\text{tBu})_3 \cdot \text{BF}_4$ | N.D.                                    |
| 12              | $\text{Pd}(\text{PPh}_3)_4$ | $i\text{Pr}_2\text{NEt}$ | MeCN    | 100 °C      | 40 mol% $\text{P}(\text{Cy})_3 \cdot \text{BF}_4$  | N.D.                                    |
| 13 <sup>c</sup> | $\text{Pd}(\text{PPh}_3)_4$ | $\text{Cs}_2\text{CO}_3$ | MeCN    | 100 °C      | none                                               | N.D.                                    |
| 14 <sup>d</sup> | $\text{Pd}(\text{PPh}_3)_4$ | $\text{Cs}_2\text{CO}_3$ | MeCN    | 100 °C      | none                                               | N.D.                                    |

[a] Reaction conditions: **1a** (1.0 equiv, 0.20 mmol),  $\text{MgBr}_2 \cdot \text{Et}_2\text{O}$  (1.1 equiv, 0.22 mmol),  $i\text{Pr}_2\text{NEt}$  (2.0 equiv, 0.40 mmol), solvent (1.00 mL),  $[\text{Pd}]$  (0.1 equiv, 0.02 mmol), base (2.0 equiv, 0.40 mmol), 100 °C, 16 h. [b] The yields were determined by <sup>1</sup>H NMR (1,3,5-trimethoxybenzene as the internal standard). [c] 1.1 equiv LiBr instead of  $\text{MgBr}_2 \cdot \text{Et}_2\text{O}$ . [d] 1.1 equiv  $\text{CuBr}_2$  instead of  $\text{MgBr}_2 \cdot \text{Et}_2\text{O}$ .

**Table S2.** Base and ligand screening for the one-pot two-step synthesis of  $\alpha, \beta$ -unsaturated secondary amides<sup>[a]</sup>

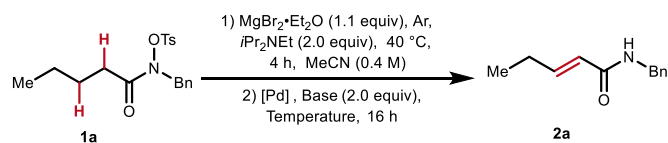

| Entry           | Pd                          | Base                     | Temperature | Ligand                          | <sup>1</sup> H-NMR Yield <sup>[b]</sup> |
|-----------------|-----------------------------|--------------------------|-------------|---------------------------------|-----------------------------------------|
| 1               | $\text{Pd}(\text{PPh}_3)_4$ | $\text{Cs}_2\text{CO}_3$ | 100 °C      | none                            | 22%                                     |
| 2               | $\text{Pd}(\text{PPh}_3)_4$ | $\text{Ag}_2\text{CO}_3$ | 100 °C      | none                            | 7%                                      |
| 3               | $\text{Pd}(\text{PPh}_3)_4$ | $\text{K}_2\text{CO}_3$  | 100 °C      | none                            | 16%                                     |
| 4               | $\text{Pd}(\text{PPh}_3)_4$ | $\text{Li}_2\text{CO}_3$ | 100 °C      | none                            | 14%                                     |
| 5               | $\text{Pd}(\text{PPh}_3)_4$ | $\text{Cs}_2\text{CO}_3$ | 100 °C      | 40 mol% P(o-Me-Ph) <sub>3</sub> | 26%                                     |
| 6               | $\text{Pd}(\text{PPh}_3)_4$ | $\text{Cs}_2\text{CO}_3$ | 100 °C      | 40 mol% X-Phos                  | 20%                                     |
| 7               | $\text{Pd}(\text{PPh}_3)_4$ | $\text{Cs}_2\text{CO}_3$ | 100 °C      | 40 mol% P(p-Cl-Ph) <sub>3</sub> | 10%                                     |
| 8               | $\text{Pd}_2(\text{dba})_3$ | $\text{Cs}_2\text{CO}_3$ | 100 °C      | none                            | < 1%                                    |
| 9               | $\text{Pd}(\text{PPh}_3)_4$ | $\text{Cs}_2\text{CO}_3$ | 80 °C       | none                            | 30%                                     |
| 10 <sup>c</sup> | $\text{Pd}(\text{PPh}_3)_4$ | $\text{Cs}_2\text{CO}_3$ | 100 °C      | none                            | 17%                                     |
| 11 <sup>c</sup> | $\text{Pd}(\text{OAc})_2$   | $\text{Cs}_2\text{CO}_3$ | 100 °C      | 40 mol% $\text{PPh}_3$          | 45%                                     |

[a] Reaction conditions: **1a** (1.0 equiv, 0.20 mmol),  $\text{MgBr}_2 \cdot \text{Et}_2\text{O}$  (1.1 equiv, 0.22 mmol),  $i\text{Pr}_2\text{NEt}$  (2.0 equiv, 0.40 mmol), MeCN (0.50 mL), 40 °C, 4 h; then [Pd] (0.1 equiv, 0.02 mmol), base (2.0 equiv, 0.40 mmol), ligand (0.4 equiv, 0.08 mmol), temperature, 16 h. [b] The yields were determined by <sup>1</sup>H NMR (1,3,5-trimethoxybenzene as the internal standard). [c] Dioxane (1.0 mL) was added into the mixture as co-solvent.  $\text{Pd}_2(\text{dba})_3$  = Tris(dibenzylideneacetone)dipalladium. X-Phos = 2-Dicyclohexylphosphino-2',4',6'-tri-*i*-propyl-1,1'-biphenyl.



**Table S3.** Co-solvent and ligand screening for the one-pot two-step synthesis of  $\alpha, \beta$ -unsaturated secondary amides<sup>[a]</sup>

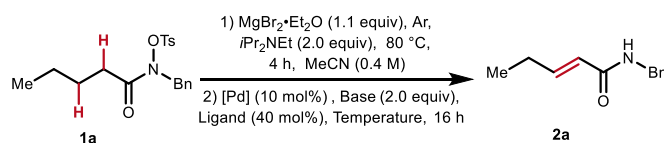

| Entry | Pd                                | Base                     | Temperature         | Ligand                 | Co-solvent     | <sup>1</sup> H-NMR Yield <sup>[b]</sup> |
|-------|-----------------------------------|--------------------------|---------------------|------------------------|----------------|-----------------------------------------|
| 1     | $\text{Pd}_2(\text{dba})_3$       | $\text{Cs}_2\text{CO}_3$ | $100^\circ\text{C}$ | $\text{PPh}_3$         | dioxane        | 27%                                     |
| 2     | $\text{Pd}(\text{OAc})_2$         | $\text{Cs}_2\text{CO}_3$ | $100^\circ\text{C}$ | $\text{PPh}_3$         | dioxane        | 42%                                     |
| 3     | $\text{Pd}(\text{OAc})_2$         | $\text{K}_2\text{CO}_3$  | $100^\circ\text{C}$ | $\text{PPh}_3$         | dioxane        | 46%                                     |
| 4     | $\text{Pd}(\text{OAc})_2$         | $\text{K}_2\text{CO}_3$  | $100^\circ\text{C}$ | $\text{PPh}_3$         | DME            | 35%                                     |
| 5     | $\text{Pd}(\text{OAc})_2$         | $\text{K}_2\text{CO}_3$  | $100^\circ\text{C}$ | $\text{PPh}_3$         | EtOAc          | 39%                                     |
| 6     | $\text{Pd}(\text{OAc})_2$         | $\text{K}_2\text{CO}_3$  | $100^\circ\text{C}$ | $\text{PPh}_3$         | EtOH           | 34%                                     |
| 7     | $\text{Pd}(\text{OAc})_2$         | $\text{K}_2\text{CO}_3$  | $100^\circ\text{C}$ | $\text{PPh}_3$         | THF            | 28%                                     |
| 8     | $\text{Pd}(\text{OAc})_2$         | $\text{K}_2\text{CO}_3$  | $100^\circ\text{C}$ | 20 mol% $\text{PPh}_3$ | dioxane        | 39%                                     |
| 9     | $\text{Pd}(\text{OAc})_2$         | $\text{K}_2\text{CO}_3$  | $100^\circ\text{C}$ | 60 mol% $\text{PPh}_3$ | dioxane        | 31%                                     |
| 10    | $\text{Pd}(\text{OAc})_2$         | $\text{K}_2\text{CO}_3$  | $100^\circ\text{C}$ | Binap                  | dioxane        | 25%                                     |
| 11    | $\text{Pd}(\text{OAc})_2$         | $\text{K}_2\text{CO}_3$  | $100^\circ\text{C}$ | dppb                   | dioxane        | 13%                                     |
| 12    | $\text{Pd}(\text{OAc})_2$         | $\text{K}_2\text{CO}_3$  | $80^\circ\text{C}$  | 10 mol% DPEphos        | dioxane        | 69%                                     |
| 13    | $\text{Pd}(\text{OAc})_2$         | $\text{K}_2\text{CO}_3$  | $80^\circ\text{C}$  | 20 mol% DPEphos        | dioxane        | 57%                                     |
| 14    | $\text{Pd}(\text{OAc})_2$         | $\text{K}_2\text{CO}_3$  | $80^\circ\text{C}$  | 30 mol% DPEphos        | dioxane        | 62%                                     |
| 15    | $\text{Pd}(\text{OAc})_2$         | $\text{K}_2\text{CO}_3$  | $80^\circ\text{C}$  | 10 mol% DPEphos        | 2.5 mL dioxane | 44%                                     |
| 16    | $\text{Pd}(\text{OAc})_2$         | $\text{K}_2\text{CO}_3$  | $80^\circ\text{C}$  | 10 mol% DPEphos        | 3.5 mL dioxane | 75%                                     |
| 17    | $\text{Pd}(\text{OAc})_2$         | $\text{K}_2\text{CO}_3$  | $80^\circ\text{C}$  | 10 mol% DPEphos        | 3.5 mL dioxane | 75%                                     |
| 18    | 5 mol% $\text{Pd}(\text{OAc})_2$  | $\text{K}_2\text{CO}_3$  | $80^\circ\text{C}$  | 10 mol% DPEphos        | 3.5 mL dioxane | 74%                                     |
| 19    | 15 mol% $\text{Pd}(\text{OAc})_2$ | $\text{K}_2\text{CO}_3$  | $80^\circ\text{C}$  | 10 mol% DPEphos        | 3.5 mL dioxane | 41%                                     |
| 20    | 5 mol% $\text{Pd}(\text{OAc})_2$  | $\text{K}_2\text{CO}_3$  | $60^\circ\text{C}$  | 10 mol% DPEphos        | 3.5 mL dioxane | 49%                                     |
| 21    | 5 mol% $\text{Pd}(\text{OAc})_2$  | $\text{K}_2\text{CO}_3$  | $80^\circ\text{C}$  | 10 mol% DPEphos        | none           | 75%                                     |
| 22    | 5 mol% $\text{Pd}(\text{OAc})_2$  | $\text{K}_2\text{CO}_3$  | $80^\circ\text{C}$  | 10 mol% XantPhos       | none           | 82%                                     |
| 23    | 5 mol% $\text{Pd}(\text{OAc})_2$  | $\text{K}_2\text{CO}_3$  | $80^\circ\text{C}$  | 10 mol% dppf           | none           | 70%                                     |

[a] Reaction conditions: **1a** (1.0 equiv, 0.20 mmol),  $\text{MgBr}_2 \cdot \text{Et}_2\text{O}$  (1.1 equiv, 0.22 mmol),  $i\text{Pr}_2\text{NEt}$  (2.0 equiv, 0.40 mmol), MeCN (0.50 mL),  $80^\circ\text{C}$ , 4 h; then [Pd] (0.1 equiv, 0.02 mmol), base (2.0 equiv, 0.40 mmol), ligand (0.4 equiv, 0.08 mmol), co-solvent (1.0 mL), temperature, 16 h. [b] The yields were determined by <sup>1</sup>H NMR (1,3,5-trimethoxybenzene as the internal standard). dppb = 1,4-Bis(diphenylphosphino)butane. DPEphos = 1-(Diphenylphosphino)-2-(2-(diphenylphosphino)phenoxy)benzene. XantPhos = 4,5-Bis(diphenylphosphino)-9,9-dimethylxanthene. dppf = 1,1'-Bis(diphenylphosphino)ferrocene.

**Table S4.** General screening of different parameters for the one-pot two-step synthesis of  $\alpha, \beta$ -unsaturated secondary amides<sup>[a]</sup>

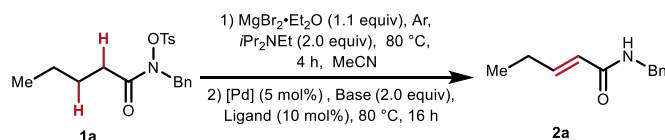

| Entry           | Pd                          | Base                     | Temperature | Ligand                                      | <sup>1</sup> H-NMR Yield <sup>[b]</sup> |
|-----------------|-----------------------------|--------------------------|-------------|---------------------------------------------|-----------------------------------------|
| 1               | none                        | $\text{K}_2\text{CO}_3$  | 80 °C       | XantPhos                                    | 0%                                      |
| 2               | $\text{Pd}(\text{OAc})_2$   | $\text{K}_2\text{CO}_3$  | 80 °C       | none                                        | 15%                                     |
| 3               | $\text{Pd}(\text{OAc})_2$   | none                     | 80 °C       | XantPhos                                    | 11%                                     |
| 4               | $\text{Pd}(\text{OAc})_2$   | $\text{K}_2\text{CO}_3$  | 80 °C       | XantPhos                                    | 82%                                     |
| 5               | $\text{Pd}(\text{OAc})_2$   | $\text{K}_2\text{CO}_3$  | 80 °C       | X-Phos                                      | 15%                                     |
| 6               | $\text{Pd}(\text{OAc})_2$   | $\text{K}_2\text{CO}_3$  | 80 °C       | S-Phos                                      | 11%                                     |
| 7               | $\text{Pd}(\text{OAc})_2$   | $\text{K}_2\text{CO}_3$  | 80 °C       | dppb                                        | 12%                                     |
| 8               | $\text{Pd}(\text{OAc})_2$   | $\text{K}_2\text{CO}_3$  | 80 °C       | dppp                                        | 9%                                      |
| 9               | $\text{Pd}(\text{OAc})_2$   | $\text{K}_2\text{CO}_3$  | 80 °C       | $\text{P}(\text{t-Bu})_3 \cdot \text{BF}_4$ | 41%                                     |
| 10              | $\text{Pd}(\text{OAc})_2$   | $\text{K}_2\text{CO}_3$  | 80 °C       | $\text{P}(\text{cy})_3 \cdot \text{BF}_4$   | 7 %                                     |
| 11              | $\text{Pd}(\text{OAc})_2$   | $\text{K}_2\text{CO}_3$  | 80 °C       | BINAP                                       | 29 %                                    |
| 12              | $\text{Pd}(\text{OAc})_2$   | $\text{K}_2\text{CO}_3$  | 80 °C       | $\text{PPh}_3$                              | 21%                                     |
| 13              | $\text{Pd}(\text{OAc})_2$   | $\text{K}_2\text{CO}_3$  | 80 °C       | DPEphos                                     | 63%                                     |
| 14              | $\text{Pd}(\text{OAc})_2$   | $\text{K}_2\text{CO}_3$  | 80 °C       | dppf                                        | 45%                                     |
| 15              | $\text{Pd}(\text{OAc})_2$   | $\text{K}_2\text{CO}_3$  | 80 °C       | $\text{P}(\text{o-Me-Ph})_3$                | 36%                                     |
| 16              | $\text{Pd}(\text{OAc})_2$   | $\text{K}_2\text{CO}_3$  | 80 °C       | $\text{P}(\text{p-Cl-Ph})_3$                | 21%                                     |
| 17              | $\text{Pd}(\text{PPh}_3)_4$ | $\text{K}_2\text{CO}_3$  | 80 °C       | XantPhos                                    | 26%                                     |
| 18              | $\text{Pd}_2(\text{dba})_3$ | $\text{K}_2\text{CO}_3$  | 80 °C       | XantPhos                                    | 67%                                     |
| 19              | $\text{Pd}(\text{OAc})_2$   | $\text{Na}_2\text{CO}_3$ | 80 °C       | XantPhos                                    | 21%                                     |
| 20              | $\text{Pd}(\text{OAc})_2$   | $\text{Cs}_2\text{CO}_3$ | 80 °C       | XantPhos                                    | 7%                                      |
| 21 <sup>c</sup> | $\text{Pd}(\text{OAc})_2$   | $\text{K}_2\text{CO}_3$  | 80 °C       | XantPhos                                    | 61%                                     |
| 22 <sup>d</sup> | $\text{Pd}(\text{OAc})_2$   | $\text{K}_2\text{CO}_3$  | 80 °C       | XantPhos                                    | 51%                                     |

[a] Reaction conditions: **1a** (1.0 equiv, 0.20 mmol),  $\text{MgBr}_2 \cdot \text{Et}_2\text{O}$  (1.1 equiv, 0.22 mmol),  $i\text{Pr}_2\text{NEt}$  (2.0 equiv, 0.40 mmol), MeCN (0.50 mL), 80 °C, 4 h; then [Pd] (0.05 equiv, 0.01 mmol), base (2.0 equiv, 0.40 mmol), ligand (0.10 equiv, 0.02 mmol), temperature, 16 h. [b] The yields were determined by <sup>1</sup>H NMR (1,3,5-trimethoxybenzene as the internal standard). [c] 1.0 mL MeCN instead of 0.5 mL MeCN. [d] 2.0 mL MeCN instead of 0.5 mL MeCN. XantPhos = 4,5-Bis(diphenylphosphino)-9,9-dimethylxanthene. X-Phos = 2-Dicyclohexylphosphino-2',4',6'-tri-*i*-propyl-1,1'-biphenyl. S-Phos = 2-Dicyclohexylphosphino-2',6'-dimethoxy-1,1'-biphenyl. dppb = 1,4-Bis(diphenylphosphino)butane. dppp = 1,3-Bis(diphenylphosphino)propane. BINAP = 1,1'-Binaphthyl-2,2'-diphenyl phosphine. DPEPhos = 1-(Diphenylphosphino)-2-(2-(diphenylphosphino)phenoxy)benzene. dppf = 1,1'-Bis(diphenylphosphino)ferrocene.



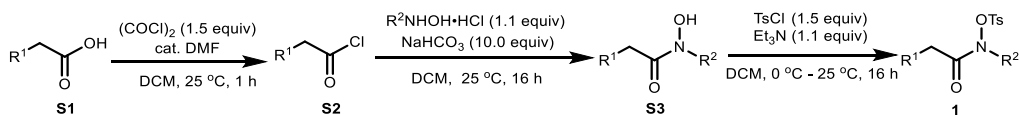

To a stirred solution of acid **S1** (1.0 mmol, 1.0 equiv) in dichloromethane (2.0 mL), was added 1 drop *N,N*-dimethylformamide. Then oxalyl chloride (127.0  $\mu\text{L}$ , 1.5 mmol, 1.5 equiv) was added slowly into the mixture. The reaction was stirred at 25 °C for 1 h before being concentrated.  $\text{NaHCO}_3$  (864 mg, 10.0 mmol, 10.0 equiv) was charged slowly (note: bubble was generated) into the acyl chloride **S2** and *N*- $\text{R}^2$ -hydroxylamine hydrochloride (1.1 mmol, 1.1 equiv) solution in dichloromethane (5.0 mL). The reaction was stirred at 25 °C for 16 h before being washed with  $\text{H}_2\text{O}$  (5.0 mL). The aqueous phase was extracted with dichloromethane ( $3 \times 5.0$  mL). After that, the organic phase was dried over anhydrous  $\text{Na}_2\text{SO}_4$ , filtered and concentrated under reduced pressure to obtain crude hydroxylamide **S3**.

To a stirred solution of hydroxylamide **S3** in dichloromethane (5.0 mL), was added *p*-toluenesulfonyl chloride (285.9 mg, 1.5 mmol, 1.5 equiv). A solution of  $\text{Et}_3\text{N}$  (152.0  $\mu\text{L}$ , 1.5 mmol, 1.5 equiv) in dichloromethane (1.0 mL) was charged slowly into reaction at 0 °C. The reaction was stirred at 25 °C for 16 h before being washed with  $\text{H}_2\text{O}$  (5.0 mL). The aqueous phase was extracted with dichloromethane ( $3 \times 5.0$  mL). After that, the organic phase was dried over anhydrous  $\text{Na}_2\text{SO}_4$ , filtered and concentrated under reduced. The residual was purified by column chromatography on silica gel to afford *O*-tosyl hydroxamate **1**.

### General Procedure B for the preparation of *O*-tosyl hydroxamate substrates **1h**, **1k**, **1q-1t**, **1x-1z**

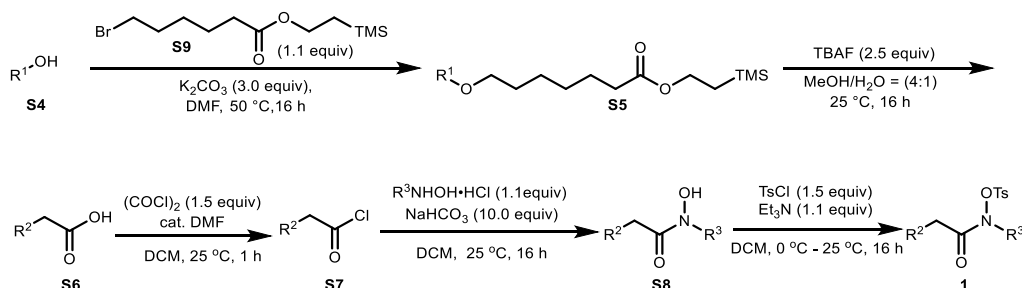

To a stirred solution of acid **S4** (2.0 mmol, 1.0 equiv) in DMF (4.0 mL), was added **S9** (2.2 mmol, 1.1 equiv) and  $\text{K}_2\text{CO}_3$  (6.0 mmol, 3.0 equiv). Then the reaction was stirred for 16 h at 50 °C before being washed with  $\text{H}_2\text{O}$  ( $3 \times 5.0$  mL). The aqueous phase was extracted with  $\text{EtOAc}$  ( $3 \times 5.0$  mL). After that, the organic phase was dried over anhydrous  $\text{Na}_2\text{SO}_4$ , filtered and concentrated under reduced pressure. The residual was directly used for the next step without any further purification to afford crude **S5**.

To a stirred solution of **S5** in MeOH and  $\text{H}_2\text{O}$  (4.0 mL and 1.0 mL), was added tetrabutylammonium fluoride (1 mol/L in THF, 2.5 mmol, 2.5 equiv). The reaction was stirred at 25 °C for 16 h before being washed with 1 M  $\text{HCl}$  (5.0 mL). The aqueous phase was extracted with dichloromethane ( $3 \times 5.0$  mL). After that, the organic phase was dried over anhydrous  $\text{Na}_2\text{SO}_4$ , filtered and concentrated under reduced. The residual was directly used for the next step without any further purification to afford

crude **S6**.

The following steps could follow the **General Procedure A** to afford *O*-tosyl hydroxamate **1**.

**General Procedure C** for the preparation of *O*-tosyl hydroxamate substrates **1n-1p**

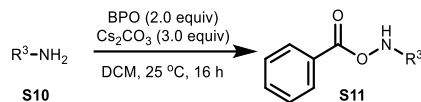

According to the synthesis method reported in literature<sup>2</sup>, benzoyl peroxide (75%, 1.93 g, 6.0 mmol, 2.0 equiv) and Cs<sub>2</sub>CO<sub>3</sub> (2.93 g, 9.0 mmol, 3.0 equiv) were taken in a tube equipped with a magnetic stir bar. Dichloromethane (20.0 mL) was added to it and the reaction was stirred vigorously for 2 h at 25 °C. After that a solution of amine **S10** (3 mmol, 1.0 equiv,) in dichloromethane (10.0 mL) was then added slowly and the mixture was further stirred for 16 h. The reaction was washed with water (10.0 mL) and extracted with dichloromethane (3 × 10.0 mL). The organic phase was dried over anhydrous Na<sub>2</sub>SO<sub>4</sub>, filtered and concentrated under reduced pressure. The residual was purified by column chromatography on silica gel to obtain *O*-benzoylhydroxylamine **S11**.

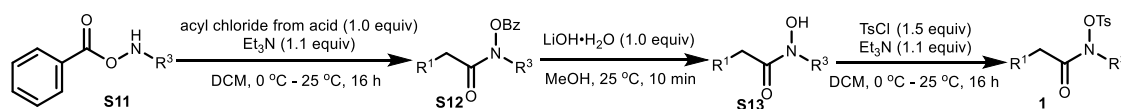

To a solution of *O*-benzoylhydroxylamine **S11** (2 mmol, 1.0 equiv) and acyl chloride (from corresponding acid, 2 mmol, 1.0 equiv) in dichloromethane (4.0 mL), was added slowly a solution of Et<sub>3</sub>N (305.2 μL, 2.2 mmol, 1.1 equiv) in dichloromethane (1.0 mL) at 0 °C. Then the reaction was stirred for 16 h at 25 °C before being washed with H<sub>2</sub>O (5.0 mL). The aqueous phase was extracted with dichloromethane (3 × 5.0 mL). After that, the organic phase was dried over anhydrous Na<sub>2</sub>SO<sub>4</sub>, filtered and concentrated under reduced pressure. The residual was purified by column chromatography on silica gel to afford *O*-benzoyl hydroxamate **S12**. To a solution of *O*-benzoyl hydroxamate **S12** (1.0 equiv) in MeOH (2.0 mL), was added slowly a solution of LiOH·H<sub>2</sub>O (83.9 mg, 2.0 mmol, 1.0 equiv) in MeOH (2.0 mL) at 25 °C. Then the reaction was stirred for 10 min at 25 °C before being concentrated under reduced pressure to obtain crude hydroxylamide **S13**. To a solution of crude hydroxylamide **S13** and *p*-toluenesulfonyl chloride (571.9 mg, 3.0 mmol, 1.5 equiv) in dichloromethane (5.0 mL), was added slowly a solution of Et<sub>3</sub>N (305.2 μL, 2.2 mmol, 1.1 equiv) in dichloromethane (2.0 mL) at 0 °C. Then the reaction was stirred for 16 h at 25 °C before being washed with H<sub>2</sub>O (5.0 mL). The aqueous phase was extracted with dichloromethane (3 × 5.0 mL). After that, the organic phase was dried over anhydrous Na<sub>2</sub>SO<sub>4</sub>, filtered and concentrated under reduced pressure. The residual was purified by column chromatography on silica gel to afford *O*-tosyl hydroxamate **1**.

### *N*-Benzyl-*N*-(tosyloxy)pentanamide (**1a**)

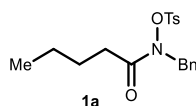

Prepared following **General Procedure A** using valeric acid (164.2 mg, 1.0 mmol, 1.0 equiv), *N*-benzylhydroxylamine hydrochloride (175.6 mg, 1.1 mmol, 1.1 equiv) and Et<sub>3</sub>N (152.0 μL, 1.1 mmol, 1.1 equiv) as starting materials to afford **1a** as a white solid.

**Yield** 307.3 mg (85%).

#### **NMR Spectroscopy:**

**<sup>1</sup>H NMR** (400 MHz, Chloroform-*d*) δ 7.88 – 7.83 (m, 2H), 7.38 (d, *J* = 8.2 Hz, 2H), 7.29 – 7.26 (m, 3H), 7.19 – 7.14 (m, 2H), 4.74 (s, 2H), 2.48 (s, 3H), 2.15 (t, *J* = 7.5 Hz, 2H), 1.43 – 1.36 (m, 2H), 1.19 – 1.10 (m, 2H), 0.79 (t, *J* = 7.3 Hz, 3H).

**<sup>13</sup>C NMR** (101 MHz, Chloroform-*d*) δ 178.2, 146.8, 135.1, 131.2, 130.3, 129.5, 129.0, 128.6, 128.1, 54.0, 32.8, 25.9, 22.2, 21.9, 13.8

**HRMS** (ESI) *m/z*: [M + H]<sup>+</sup> calcd for C<sub>19</sub>H<sub>24</sub>NO<sub>4</sub>S<sup>+</sup>: 362.1421, found: 362.1417.

### *N*-Benzyl-3-phenyl-*N*-(tosyloxy)propanamide (**1b**)

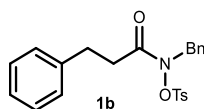

Prepared following **General Procedure A** using 3-phenylpropionic acid (300.4 mg, 2.0 mmol, 1.0 equiv), *N*-benzylhydroxylamine hydrochloride (351.2 mg, 2.2 mmol, 1.1 equiv) and Et<sub>3</sub>N (304.0 μL, 2.2 mmol, 1.1 equiv) as starting materials to afford **1b** as a white solid.

**Yield** 496.7 mg (61%).

#### **NMR Spectroscopy:**

**<sup>1</sup>H NMR** (400 MHz, Chloroform-*d*) δ 7.76 (d, *J* = 8.1 Hz, 2H), 7.28 (d, *J* = 8.1 Hz, 2H), 7.19 – 7.13 (m, 5H), 7.11 (d, *J* = 7.2 Hz, 1H), 7.03 (dd, *J* = 6.6, 2.8 Hz, 2H), 6.99 – 6.94 (m, 2H), 4.67 (s, 2H), 2.70 (t, *J* = 7.7 Hz, 2H), 2.43– 2.40 (m, 5H).

**<sup>13</sup>C NMR** (101 MHz, Chloroform-*d*) δ 177.2, 146.9, 140.6, 134.9, 131.1, 130.4, 129.5, 128.9, 128.7, 128.5, 128.4, 128.1, 126.3, 53.9, 34.7, 29.8, 22.0.

**HRMS** (ESI) *m/z*: [M + H]<sup>+</sup> calcd for C<sub>23</sub>H<sub>24</sub>NO<sub>4</sub>S<sup>+</sup>: 410.1421, found: 410.1419

### *N*-Benzyl-3-(4-fluorophenyl)-*N*-(tosyloxy)propanamide (**1c**)

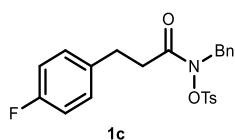

Prepared following **General Procedure A** using 3-(4-fluorophenyl)propanoic acid (336.3 mg, 2.0 mmol, 1.0 equiv), *N*-benzylhydroxylamine hydrochloride (351.2 mg, 2.2 mmol, 1.1 equiv) and Et<sub>3</sub>N (304.2 μL, 2.2 mmol, 1.1 equiv) as starting materials to afford **1c** as a white solid.

**Yield** 355.7 mg (41%).

### NMR Spectroscopy:

$^1\text{H}$  NMR (400 MHz, Chloroform-*d*)  $\delta$  7.80 – 7.74 (m, 2H), 7.29 (d,  $J$  = 8.1 Hz, 2H), 7.19 – 7.17 (m, 3H), 7.02 – 6.97 (m, 2H), 6.94 – 6.91 (m, 2H), 6.87 – 6.81 (m, 2H), 4.62 (s, 2H), 2.69 (t,  $J$  = 7.5 Hz, 2H), 2.44 – 2.41 (m, 5H).

$^{13}\text{C}$  NMR (101 MHz, Chloroform-*d*)  $\delta$  177.0, 161.5 (d,  $J$  = 244.4 Hz), 147.0, 136.2 (d,  $J$  = 3.0 Hz), 134.8, 131.1, 130.4, 129.9 (d,  $J$  = 8.1 Hz), 129.5, 128.9, 128.6, 128.2, 115.2 (d,  $J$  = 21.2 Hz), 53.8, 34.7, 29.0, 22.0.

$^{19}\text{F}$  NMR (377 MHz, Chloroform-*d*)  $\delta$  -117.24.

HRMS (ESI)  $m/z$ :  $[\text{M} + \text{H}]^+$  calcd for  $\text{C}_{23}\text{H}_{23}\text{FNO}_4\text{S}^+$ : 428.1327, found: 428.1325

### *N*-Benzyl-3-(4-methoxyphenyl)-*N*-(tosyloxy)propenamide (1d)

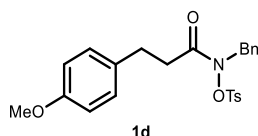

Prepared following **General Procedure A** using 3-(4-methoxyphenyl)propanoic acid (360.4 mg, 2.0 mmol, 1.0 equiv), *N*-benzylhydroxylamine hydrochloride (351.2 mg, 2.2 mmol, 1.1 equiv) and  $\text{Et}_3\text{N}$  (304.2  $\mu\text{L}$ , 2.2 mmol, 1.1 equiv) as starting materials to afford **1d** as a colourless oil.

**Yield** 628.7 mg (72%).

### NMR Spectroscopy:

$^1\text{H}$  NMR (400 MHz, Chloroform-*d*)  $\delta$  7.76 (d,  $J$  = 8.1 Hz, 2H), 7.29 (d,  $J$  = 8.0 Hz, 2H), 7.23 – 7.17 (m, 3H), 7.02 – 7.00 (m, 2H), 6.88 (d,  $J$  = 8.3 Hz, 2H), 6.70 (d,  $J$  = 8.3 Hz, 2H), 4.65 (s, 2H), 3.71 (s, 3H), 2.64 (t,  $J$  = 7.6 Hz, 2H), 2.40 – 2.36 (m, 5H).

$^{13}\text{C}$  NMR (101 MHz, Chloroform-*d*)  $\delta$  177.2, 158.1, 146.9, 134.9, 132.6, 131.1, 130.4, 129.5, 129.4, 128.9, 128.6, 128.1, 113.9, 55.4, 53.9, 34.9, 29.0, 22.0.

HRMS (ESI)  $m/z$ :  $[\text{M} + \text{H}]^+$  calcd for  $\text{C}_{24}\text{H}_{26}\text{NO}_5\text{S}^+$ : 440.1526, found: 440.1525.

### *N*-Benzyl-*N*-(tosyloxy)-3-(4-(trifluoromethyl)phenyl)propenamide (1e)

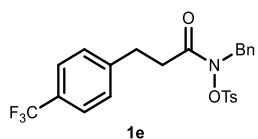

Prepared following **General Procedure A** using 3-(4-trifluoromethyl)propanoic acid (445.2 mg, 2.0 mmol, 1.0 equiv), *N*-benzylhydroxylamine hydrochloride (351.2 mg, 2.2 mmol, 1.1 equiv) and  $\text{Et}_3\text{N}$  (304.2  $\mu\text{L}$ , 2.2 mmol, 1.1 equiv) as starting materials to afford **1e** as a white solid.

**Yield** 663.5 mg (69%).

### NMR Spectroscopy:

$^1\text{H}$  NMR (400 MHz, Chloroform-*d*)  $\delta$  7.86 (d,  $J$  = 8.1 Hz, 2H), 7.49 (d,  $J$  = 8.0 Hz, 2H), 7.39 (d,  $J$  = 8.1 Hz, 2H), 7.29 – 7.25 (m, 3H), 7.18 (d,  $J$  = 8.0 Hz, 2H), 7.10 – 7.05 (m, 2H), 4.69 (s, 2H), 2.88 (t,  $J$  = 7.4 Hz, 2H), 2.59 (t,  $J$  = 7.4 Hz, 2H), 2.50 (s, 3H).

$^{13}\text{C}$  NMR (151 MHz, Chloroform-*d*)  $\delta$  176.7, 147.1, 144.7, 134.7, 131.0, 130.4, 129.4, 128.9, 128.8, 128.6, 128.4, 128.2, 125.4 (q,  $J = 4.5$  Hz), 124.4 (q,  $J = 271.8$  Hz), 53.8, 34.1, 29.6, 21.9.

$^{19}\text{F}$  NMR (376 MHz, Chloroform-*d*)  $\delta$  -62.34.

HRMS (ESI)  $m/z$ :  $[\text{M} + \text{H}]^+$  calcd for  $\text{C}_{24}\text{H}_{23}\text{F}_3\text{NO}_4\text{S}^+$ : 478.1294, found: 478.1292.

### *N*-Benzyl-3-(4,5-diphenyloxazol-2-yl)-*N*-(tosyloxy)propanamide (**1f**)

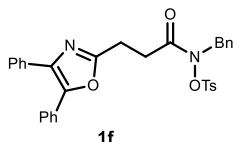

Prepared following **General Procedure A** using oxaprozin (586.6 mg, 2.0 mmol, 1.0 equiv), *N*-benzylhydroxylamine hydrochloride (351.2 mg, 2.2 mmol, 1.1 equiv) and  $\text{Et}_3\text{N}$  (304.2  $\mu\text{L}$ , 2.2 mmol, 1.1 equiv) as starting materials to afford **1f** as a yellow oil.

**Yield** 578.9 mg (52%).

#### NMR Spectroscopy:

$^1\text{H}$  NMR (400 MHz, Chloroform-*d*)  $\delta$  7.87 (d,  $J = 8.1$  Hz, 2H), 7.62 (d,  $J = 7.0$  Hz, 2H), 7.56 (dd,  $J = 7.8, 1.8$  Hz, 2H), 7.39 – 7.31 (m, 8H), 7.22 – 7.13 (m, 5H), 4.75 (s, 2H), 3.05 (t,  $J = 7.3$  Hz, 2H), 2.86 (t,  $J = 7.3$  Hz, 2H), 2.42 (s, 3H).

$^{13}\text{C}$  NMR (101 MHz, Chloroform-*d*)  $\delta$  176.2, 161.9, 147.1, 145.5, 135.1, 134.7, 132.6, 131.0, 130.4, 129.5, 129.1, 128.8, 128.7, 128.67, 128.65, 128.18, 128.15, 128.1, 126.7, 54.0, 30.3, 22.8, 22.0.

HRMS (ESI)  $m/z$ :  $[\text{M} + \text{H}]^+$  calcd for  $\text{C}_{32}\text{H}_{29}\text{N}_2\text{O}_5\text{S}^+$ : 553.1792, found: 553.1788.

### *N*-Benzyl-4,4,4-trifluoro-*N*-(tosyloxy)butanamide (**1g**)

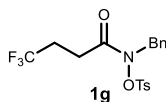

Prepared following **General Procedure A** using 4,4,4-trifluorobutanoic acid (284.2 mg, 2.0 mmol, 1.0 equiv), *N*-benzylhydroxylamine hydrochloride (351.2 mg, 2.2 mmol, 1.1 equiv) and  $\text{Et}_3\text{N}$  (304.2  $\mu\text{L}$ , 2.2 mmol, 1.1 equiv) as starting materials to afford **1g** as a colorless oil.

**Yield** 505.8 mg (63%).

#### NMR Spectroscopy:

$^1\text{H}$  NMR (400 MHz, Chloroform-*d*)  $\delta$  7.92 – 7.86 (m, 2H), 7.44 (d,  $J = 8.1$  Hz, 2H), 7.33 – 7.29 (m, 3H), 7.19 (dd,  $J = 6.6, 3.0$  Hz, 2H), 4.80 (s, 2H), 2.51 (s, 3H), 2.45 – 2.36 (m, 2H), 2.36 – 2.25 (m, 2H).

$^{13}\text{C}$  NMR (101 MHz, Chloroform-*d*)  $\delta$  174.9, 147.4, 134.6, 130.7, 130.5, 129.4, 129.0, 128.8, 128.4, 126.6 (q,  $J = 277.8$  Hz), 54.1, 28.6 (q,  $J = 30.3$  Hz), 26.3 (q,  $J = 3.1$  Hz), 21.9.

$^{19}\text{F}$  NMR (376 MHz, Chloroform-*d*)  $\delta$  -66.79.

HRMS (ESI)  $m/z$ :  $[\text{M} + \text{H}]^+$  calcd for  $\text{C}_{18}\text{H}_{19}\text{F}_3\text{NO}_4\text{S}^+$ : 402.0982, found: 402.0978.

### *N*-Benzyl-6-(naphthalen-2-yloxy)-*N*-(tosyloxy)hexanamide (**1h**)



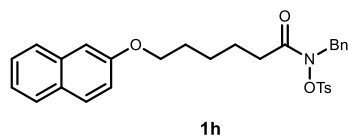

Prepared following **General Procedure B** using naphthalen-2-ol (288.3 mg, 2.0 mmol, 1.0 equiv), *N*-benzylhydroxylamine hydrochloride (351.2 mg, 2.2 mmol, 1.1 equiv) and Et<sub>3</sub>N (304.2 μL, 2.2 mmol, 1.1 equiv) as starting materials to afford **1h** as a colourless oil.

**Yield** 732.4 mg (71%).

**NMR Spectroscopy:**

**<sup>1</sup>H NMR** (400 MHz, Chloroform-*d*) δ 7.89 – 7.83 (m, 2H), 7.79 – 7.70 (m, 3H), 7.47 – 7.41 (m, 1H), 7.38 (d, *J* = 8.1 Hz, 2H), 7.35 – 7.30 (m, 1H), 7.27 (d, *J* = 1.8 Hz, 1H), 7.26 (s, 2H), 7.20 – 7.08 (m, 4H), 4.74 (s, 2H), 4.00 (t, *J* = 6.5 Hz, 2H), 2.46 (s, 3H), 2.23 (t, *J* = 7.4 Hz, 2H), 1.80 – 1.70 (m, 2H), 1.53 (d, *J* = 7.7 Hz, 2H), 1.40 – 1.31 (m, 2H).

**<sup>13</sup>C NMR** (101 MHz, Chloroform-*d*) δ 178.0, 157.1, 146.9, 135.0, 134.7, 131.0, 130.4, 129.49, 129.47, 129.0, 128.7, 128.2, 127.8, 126.8, 126.5, 123.6, 119.1, 106.6, 67.7, 53.9, 32.9, 29.0, 25.6, 23.6, 22.0.

**HRMS** (ESI) *m/z*: [M + Na]<sup>+</sup> calcd for C<sub>30</sub>H<sub>31</sub>NO<sub>5</sub>SNa<sup>+</sup>: 540.1815, found: 540.1811.

**(9Z,12Z)-N-Benzyl-N-(tosyloxy)octadeca-9,12-dienamide (1i)**

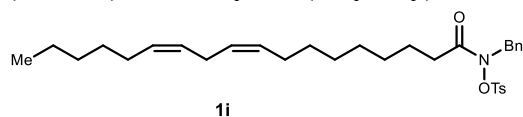

Prepared following **General Procedure A** using linoleic acid (622.0 μL, 2.0 mmol, 1.0 equiv), *N*-benzylhydroxylamine hydrochloride (351.2 mg, 2.2 mmol, 1.1 equiv) and Et<sub>3</sub>N (304.2 μL, 2.2 mmol, 1.1 equiv) as starting materials to afford **1i** as a colourless oil.

**Yield** 736.2 mg (68%).

**NMR Spectroscopy:**

**<sup>1</sup>H NMR** (400 MHz, Chloroform-*d*) δ 7.79 (d, *J* = 8.1 Hz, 2H), 7.32 (d, *J* = 8.1 Hz, 2H), 7.19 (d, *J* = 2.5 Hz, 3H), 7.09 (dd, *J* = 6.7, 2.9 Hz, 2H), 5.37 – 5.21 (m, 4H), 4.66 (s, 2H), 2.70 (t, *J* = 6.3 Hz, 2H), 2.41 (s, 3H), 2.08 (t, *J* = 7.4 Hz, 2H), 2.03 – 1.91 (m, 4H), 1.39 – 1.05 (m, 16H), 0.82 (t, *J* = 6.7 Hz, 3H).

**<sup>13</sup>C NMR** (101 MHz, Chloroform-*d*) δ 178.2, 146.8, 135.0, 131.1, 130.4, 130.3, 130.2, 129.5, 129.0, 128.6, 128.2, 128.1, 128.0, 53.9, 53.6, 33.0, 31.7, 29.7, 29.5, 29.3, 29.2, 29.0, 27.3, 25.8, 23.8, 22.7, 22.0, 14.2.

**HRMS** (ESI) *m/z*: [M + Na]<sup>+</sup> calcd for C<sub>32</sub>H<sub>45</sub>NO<sub>4</sub>SNa<sup>+</sup>: 562.2961, found: 562.2956.

**N-Benzyl-N-(tosyloxy)undec-10-enamide (1j)**

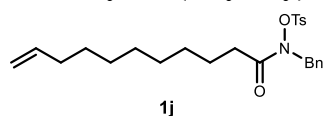

Prepared following **General Procedure A** using undecenoic acid (404.1 μL, 2.0 mmol,

1.0 equiv), *N*-benzylhydroxylamine hydrochloride (351.2 mg, 2.2 mmol, 1.1 equiv) and Et<sub>3</sub>N (304.2 μL, 2.2 mmol, 1.1 equiv) as starting materials to afford **1j** as a colourless oil.

**Yield** 441.5 mg (50%).

**NMR Spectroscopy:**

<sup>1</sup>H NMR (400 MHz, Chloroform-*d*) δ 7.93 – 7.85 (m, 2H), 7.41 (d, *J* = 8.1 Hz, 2H), 7.32 – 7.28 (m, 3H), 7.18 (dd, *J* = 6.7, 3.0 Hz, 2H), 5.89 – 5.78 (m, 1H), 5.06 – 4.94 (m, 2H), 4.75 (s, 2H), 2.51 (s, 3H), 2.16 (t, *J* = 7.4 Hz, 2H), 2.08 – 2.02 (m, 2H), 1.48 – 1.35 (m, 4H), 1.32 – 1.11 (m, 8H).

<sup>13</sup>C NMR (101 MHz, Chloroform-*d*) δ 178.2, 146.8, 139.3, 135.1, 131.2, 130.3, 129.5, 129.0, 128.6, 128.1, 114.3, 53.9, 33.9, 33.1, 29.4, 29.3, 29.2, 29.1, 29.0, 23.9, 22.0.

**HRMS** (ESI) *m/z*: [M + Na]<sup>+</sup> calcd for C<sub>25</sub>H<sub>33</sub>NO<sub>4</sub>SNa<sup>+</sup>: 466.2022, found: 466.2020.

**6-(Benzyl(tosyloxy)amino)-6-oxohexyl benzoate (1k)**

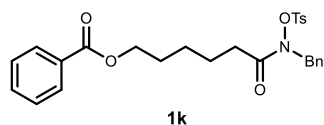

Prepared following **General Procedure B** using benzoic acid (244.2 mg, 2.0 mmol, 1.0 equiv), *N*-benzylhydroxylamine hydrochloride (351.2 mg, 2.2 mmol, 1.1 equiv) and Et<sub>3</sub>N (304.2 μL, 2.2 mmol, 1.1 equiv) as starting materials to afford **1k** as a colourless oil.

**Yield** 226.6 mg (23%).

**NMR Spectroscopy:**

<sup>1</sup>H NMR (400 MHz, Chloroform-*d*) δ 8.14 – 8.05 (m, 2H), 7.92 – 7.87 (m, 2H), 7.63 – 7.57 (m, 1H), 7.52 – 7.46 (m, 2H), 7.41 (d, *J* = 8.0 Hz, 2H), 7.30 (d, *J* = 3.1 Hz, 3H), 7.24 – 7.17 (m, 2H), 4.75 (s, 2H), 4.28 (t, *J* = 6.6 Hz, 2H), 2.50 (s, 3H), 2.26 (t, *J* = 7.3 Hz, 2H), 1.74 – 1.65 (m, 2H), 1.61 – 1.53 (m, 2H), 1.34 – 1.30 (m, 2H).

<sup>13</sup>C NMR (101 MHz, Chloroform-*d*) δ 177.9, 166.8, 146.9, 135.0, 133.0, 131.1, 130.6, 130.3, 129.7, 129.5, 129.0, 128.6, 128.5, 128.2, 64.9, 53.9, 32.9, 28.6, 25.6, 23.6, 22.0.

**HRMS** (ESI) *m/z*: [M + Na]<sup>+</sup> calcd for C<sub>27</sub>H<sub>29</sub>NO<sub>6</sub>SNa<sup>+</sup>: 518.1608, found: 518.1606.

***N*-Benzyl-3-cyclopentyl-*N*-(tosyloxy)propenamide (1l)**

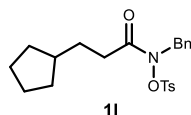

Prepared following **General Procedure A** using 3-cyclopentylpropanoic acid (290.0 μL, 2.0 mmol, 1.0 equiv), *N*-benzylhydroxylamine hydrochloride (351.2 mg, 2.2 mmol, 1.1 equiv) and Et<sub>3</sub>N (304.2 μL, 2.2 mmol, 1.1 equiv) as starting materials to afford **1l** as a white solid.

**Yield** 567.8 mg (71%).

**NMR Spectroscopy:**

**<sup>1</sup>H NMR** (400 MHz, Chloroform-*d*)  $\delta$  7.89 (d,  $J = 8.1$  Hz, 2H), 7.42 (d,  $J = 8.0$  Hz, 2H), 7.30 (dd,  $J = 4.8, 1.9$  Hz, 3H), 7.20 (dd,  $J = 6.7, 2.9$  Hz, 2H), 4.78 (s, 2H), 2.51 (s, 3H), 2.14 (t,  $J = 7.7$  Hz, 2H), 1.67 – 1.54 (m, 6H), 1.48 – 1.40 (m, 3H), 1.02 – 0.88 (m, 2H).

**<sup>13</sup>C NMR** (101 MHz, Chloroform-*d*)  $\delta$  178.3, 146.9, 135.0, 131.1, 130.3, 129.5, 129.1, 128.6, 128.1, 54.0, 39.5, 32.5, 32.3, 29.9, 25.2, 22.0.

**HRMS** (ESI)  $m/z$ :  $[M + H]^+$  calcd for C<sub>22</sub>H<sub>28</sub>NO<sub>4</sub>S<sup>+</sup>: 402.1734, found: 402.1731.

***N*-Benzyl-3-cyclohexyl-*N*-(tosyloxy)propenamide (1m)**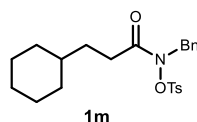

Prepared following **General Procedure A** using 3-cyclohexylpropanoic acid (312.4 mg, 2.0 mmol, 1.0 equiv), *N*-benzylhydroxylamine hydrochloride (351.2 mg, 2.2 mmol, 1.1 equiv) and Et<sub>3</sub>N (304.2  $\mu$ L, 2.2 mmol, 1.1 equiv) as starting materials to afford **1m** as a white solid.

**Yield** 574.1 mg (69%).

**NMR Spectroscopy:**

**<sup>1</sup>H NMR** (400 MHz, Chloroform-*d*)  $\delta$  7.83 – 7.77 (m, 2H), 7.32 (d,  $J = 8.1$  Hz, 2H), 7.22 – 7.19 (m, 3H), 7.14 – 7.08 (m, 2H), 4.68 (s, 2H), 2.41 (s, 3H), 2.04 (t,  $J = 7.7$  Hz, 2H), 1.61 – 1.52 (m, 3H), 1.46 – 1.39 (m, 2H), 1.25 – 1.18 (m, 2H), 1.08 – 0.88 (m, 4H), 0.72 – 0.62 (m, 2H).

**<sup>13</sup>C NMR** (151 MHz, Chloroform-*d*)  $\delta$  178.5, 146.9, 135.0, 131.2, 130.3, 129.5, 129.1, 128.6, 128.1, 54.0, 37.1, 33.0, 31.1, 30.6, 26.6, 26.3, 22.0.

**HRMS** (ESI)  $m/z$ :  $[M + H]^+$  calcd for C<sub>23</sub>H<sub>30</sub>NO<sub>4</sub>S<sup>+</sup>: 416.1890, found: 416.1886.

***N*-(2-(Cyclohex-1-en-1-yl)ethyl)-3-phenyl-*N*-(tosyloxy)propenamide (1n)**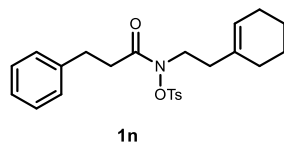

Prepared following **General Procedure C** using 2-(cyclohex-1-en-1-yl)ethan-1-amine (418.3  $\mu$ L, 3.0 mmol, 1.0 equiv), 3-phenylpropionic acid (300.4 mg, 2.0 mmol) and Et<sub>3</sub>N (304.2  $\mu$ L, 2.2 mmol) as starting materials to afford **1n** as a colourless oil.

**Yield** 673.3 mg (52%).

**NMR Spectroscopy:**

**<sup>1</sup>H NMR** (400 MHz, Chloroform-*d*)  $\delta$  7.90 – 7.84 (m, 2H), 7.38 (d,  $J = 8.1$  Hz, 2H), 7.28 (s, 2H), 7.24 – 7.18 (m, 1H), 7.09 – 7.06 (m, 2H), 5.39 (s, 1H), 3.69 (s, 2H), 2.80 – 2.74 (m, 2H), 2.49 – 2.44 (m, 5H), 2.14 (t,  $J = 6.9$  Hz, 2H), 1.97 – 1.90 (m, 2H), 1.88 – 1.84 (m, 2H), 1.59 – 1.48 (m, 4H).

**<sup>13</sup>C NMR** (101 MHz, Chloroform-*d*)  $\delta$  177.1, 146.8, 140.8, 134.1, 131.2, 130.3, 129.5, 128.5, 128.4, 126.3, 124.7, 49.3, 34.7, 34.6, 30.1, 27.9, 25.5, 22.9, 22.3, 22.0.

HRMS (ESI)  $m/z$ :  $[M + H]^+$  calcd for  $C_{24}H_{30}NO_4S^+$ : 428.1890, found: 428.1882.

**(Z)-N-(Octadec-9-en-1-yl)-3-phenyl-N-(tosyloxy)propenamide (1o)**

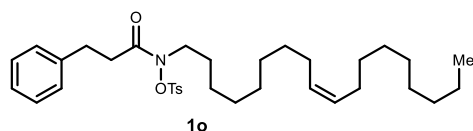

Prepared following **General Procedure C** using oleylamine (987.0  $\mu$ L, 3.0 mmol, 1.0 equiv), 3-phenylpropionic acid (300.4 mg, 2.0 mmol) and  $Et_3N$  (304.2  $\mu$ L, 2.2 mmol) as starting materials to afford **1o** as a colourless oil.

**Yield** 931.8 mg (55%).

**NMR Spectroscopy:**

**$^1H$  NMR** (400 MHz, Chloroform-*d*)  $\delta$  7.87 (d,  $J = 7.9$  Hz, 2H), 7.38 (d,  $J = 8.0$  Hz, 2H), 7.28 (d,  $J = 3.0$  Hz, 2H), 7.20 (t,  $J = 7.3$  Hz, 1H), 7.09 (d,  $J = 7.4$  Hz, 2H), 5.41 – 5.36 (m, 2H), 3.57 (t,  $J = 7.5$  Hz, 2H), 2.81 (t,  $J = 7.8$  Hz, 2H), 2.51 – 2.47 (m, 5H), 2.04 (d,  $J = 6.5$  Hz, 2H), 1.50 (q,  $J = 7.5$  Hz, 2H), 1.42 – 1.09 (m, 24H), 0.91 (t,  $J = 6.6$  Hz, 3H).

**$^{13}C$  NMR** (101 MHz, Chloroform-*d*)  $\delta$  176.9, 146.8, 140.7, 131.2, 130.3, 130.1, 129.9, 129.4, 128.5, 128.4, 126.3, 50.9, 34.6, 32.0, 30.1, 29.92, 29.87, 29.8, 29.7, 29.48, 29.45, 29.3, 29.2, 27.4, 27.3, 26.7, 26.2, 22.8, 22.0, 14.2.

HRMS (ESI)  $m/z$ :  $[M + Na]^+$  calcd for  $C_{34}H_{51}NO_4SNa^+$ : 592.3431, found: 592.3419.

**N-(3-Methoxypropyl)-3-phenyl-N-(tosyloxy)propenamide (1p)**

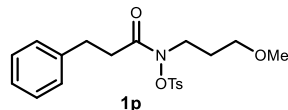

Prepared following **General Procedure C** using 3-methoxypropan-1-amine (306.0  $\mu$ L, 3.0 mmol, 1.0 equiv), 3-phenylpropionic acid (300.4 mg, 2.0 mmol) and  $Et_3N$  (304.2  $\mu$ L, 2.2 mmol) as starting materials to afford **1p** as a colourless oil.

**Yield** 349.3 mg (30%).

**NMR Spectroscopy:**

**$^1H$  NMR** (400 MHz, Chloroform-*d*)  $\delta$  7.87 (d,  $J = 8.1$  Hz, 2H), 7.38 (d,  $J = 7.9$  Hz, 2H), 7.28 (d,  $J = 2.2$  Hz, 2H), 7.21 (d,  $J = 7.0$  Hz, 1H), 7.13 – 7.06 (m, 2H), 3.70 (t,  $J = 7.2$  Hz, 2H), 3.30 – 3.26 (m, 5H), 2.81 (t,  $J = 7.8$  Hz, 2H), 2.53 – 2.49 (m, 5H), 1.83 – 1.77 (m, 2H).

**$^{13}C$  NMR** (101 MHz, Chloroform-*d*)  $\delta$  177.0, 146.8, 140.7, 131.1, 130.3, 129.5, 128.5, 128.4, 126.3, 69.9, 58.6, 48.4, 34.6, 30.1, 26.5, 22.0.

HRMS (ESI)  $m/z$ :  $[M + H]^+$  calcd for  $C_{20}H_{26}NO_5S^+$ : 392.1526, found: 392.1517.

**6-(Benzyl(tosyloxy)amino)-6-oxohexyl  
dimethylpentanoate (1q)**

**5-(2,5-dimethylphenoxy)-2,2-  
dimethylpentanoate**

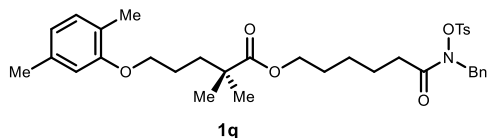

Prepared following **General Procedure B** using gemfibrozil (500.6 mg, 2.0 mmol, 1.0 equiv), *N*-benzylhydroxylamine hydrochloride (351.2 mg, 2.2 mmol, 1.1 equiv) and Et<sub>3</sub>N (304.2 μL, 2.2 mmol, 1.1 equiv) as starting materials to afford **1q** as a colourless oil.

**Yield** 900.8 mg (72%).

**NMR Spectroscopy:**

**<sup>1</sup>H NMR** (400 MHz, Chloroform-*d*) δ 7.79 – 7.74 (m, 2H), 7.29 (d, *J* = 8.1 Hz, 2H), 7.18 (d, *J* = 4.6 Hz, 3H), 7.09 – 7.03 (m, 2H), 6.91 (d, *J* = 7.5 Hz, 1H), 6.59 – 6.55 (m, 1H), 6.52 (d, *J* = 1.6 Hz, 1H), 4.60 (s, 2H), 3.90 (t, *J* = 6.7 Hz, 2H), 3.85 – 3.80 (m, 2H), 2.39 (s, 3H), 2.21 (s, 3H), 2.13 (t, *J* = 7.3 Hz, 2H), 2.08 (s, 3H), 1.72 – 1.60 (m, 6H), 1.48 – 1.36 (m, 4H), 1.12 (s, 6H).

**<sup>13</sup>C NMR** (101 MHz, Chloroform-*d*) δ 177.9, 157.1, 146.9, 136.6, 135.0, 131.1, 130.4, 130.3, 129.5, 129.0, 128.6, 128.2, 123.7, 120.8, 112.1, 68.1, 64.3, 53.9, 42.2, 37.2, 32.9, 28.5, 25.5, 25.3, 23.5, 22.0, 21.5, 15.9.

**HRMS** (ESI) *m/z*: [M + H]<sup>+</sup> calcd for C<sub>35</sub>H<sub>46</sub>NO<sub>7</sub>S<sup>+</sup>: 624.2990, found: 624.2982.

**6-(Methyl(tosyloxy)amino)-6-oxohexyl methylthiazole-5-carboxylate (1r)**

**2-(3-cyano-4-isobutoxyphenyl)-4-**

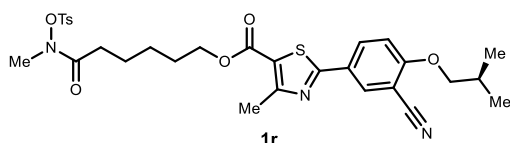

Prepared following **General Procedure B** using febuxostat (958.1 mg, 3.0 mmol, 1.0 equiv), *N*-methylhydroxylamine hydrochloride (200.0 mg, 2.2 mmol) and Et<sub>3</sub>N (304.2 μL, 2.2 mmol) as starting materials to afford **1r** as a colourless oil.

**Yield** 1177.5 mg (64%).

**NMR Spectroscopy:**

**<sup>1</sup>H NMR** (400 MHz, Chloroform-*d*) δ 8.18 (d, *J* = 2.4 Hz, 1H), 8.10 (d, *J* = 8.7 Hz, 1H), 7.90 – 7.85 (m, 2H), 7.40 (d, *J* = 8.0 Hz, 2H), 7.01 (d, *J* = 8.9 Hz, 1H), 4.26 (t, *J* = 6.5 Hz, 2H), 3.89 (d, *J* = 6.5 Hz, 2H), 3.08 (d, *J* = 1.1 Hz, 3H), 2.76 (d, *J* = 1.1 Hz, 3H), 2.48 (s, 3H), 2.30 (t, *J* = 7.4 Hz, 2H), 2.20 (dt, *J* = 13.3, 6.6 Hz, 1H), 1.76 – 1.67 (m, 2H), 1.60 – 1.52 (m, 2H), 1.36 (q, *J* = 8.2 Hz, 2H), 1.08 (d, *J* = 6.7 Hz, 6H).

**<sup>13</sup>C NMR** (101 MHz, Chloroform-*d*) δ 178.5, 167.4, 162.6, 162.2, 161.3, 146.9, 132.7, 132.2, 131.0, 130.4, 129.5, 126.1, 121.9, 115.5, 112.7, 103.1, 75.8, 65.3, 38.2, 32.5, 28.5, 28.3, 25.6, 23.6, 22.0, 19.2, 17.6.

**HRMS** (ESI) *m/z*: [M + H]<sup>+</sup> calcd for C<sub>30</sub>H<sub>36</sub>N<sub>3</sub>O<sub>7</sub>S<sub>2</sub><sup>+</sup>: 614.1989, found: 614.1982.

***N*-Methyl-6-(((*R*)-2,5,7,8-tetramethyl-2-((4*R*,8*R*)-4,8,12-trimethyltridecyl)chroman-6-yl)oxy)-*N*-(tosyloxy)hexanamide (1s)**

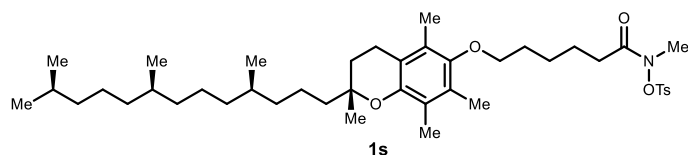

Prepared following **General Procedure B** using vitamin E (861.4 mg, 2.0 mmol, 1.0 equiv), *N*-methylhydroxylamine hydrochloride (200.0 mg, 2.2 mmol, 1.1 equiv) and Et<sub>3</sub>N (304.2 μL, 2.2 mmol, 1.1 equiv) as starting materials to afford **1s** as a colourless oil.

**Yield** 1049.1 mg (72%).

**NMR Spectroscopy:**

<sup>1</sup>H NMR (400 MHz, Chloroform-*d*) δ 7.88 (d, *J* = 8.4 Hz, 2H), 7.41 (d, *J* = 8.1 Hz, 2H), 3.59 (t, *J* = 6.5 Hz, 2H), 3.15 (s, 3H), 2.57 (t, *J* = 6.8 Hz, 2H), 2.48 (s, 3H), 2.22 (t, *J* = 7.4 Hz, 2H), 2.16 (s, 2H), 2.10 (d, *J* = 11.9 Hz, 6H), 1.86 – 1.69 (m, 4H), 1.59 – 1.49 (m, 6H), 1.45 – 1.35 (m, 6H), 1.31 – 1.22 (m, 11H), 1.17 – 1.05 (m, 6H), 0.89 – 0.84 (m, 12H).

<sup>13</sup>C NMR (101 MHz, Chloroform-*d*) δ 178.5, 148.4, 147.8, 146.9, 131.0, 130.3, 129.5, 127.9, 125.9, 122.9, 117.6, 72.8, 40.3, 39.5, 38.4, 37.7, 37.6, 37.5, 37.4, 32.9, 32.8, 32.6, 31.4, 30.2, 28.1, 25.8, 24.9, 24.6, 24.0, 23.9, 22.9, 22.8, 22.0, 21.2, 20.8, 19.9, 19.8, 12.9, 12.0, 11.9.

**HRMS** (ESI) *m/z*: [M + H]<sup>+</sup> calcd for C<sub>43</sub>H<sub>70</sub>NO<sub>6</sub>S<sup>+</sup>: 728.4919, found: 728.4900.

**6-(Methyl(tosyloxy)amino)-6-oxohexyl 2-(11-oxo-6,11-dihydrodibenzo[*b,e*]oxepin-2-yl)acetate (1t)**

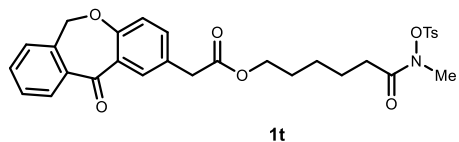

Prepared following **General Procedure B** using isoxepac (536.5 mg, 2.0 mmol, 1.0 equiv), *N*-methylhydroxylamine hydrochloride (200.0 mg, 2.2 mmol, 1.1 equiv) and Et<sub>3</sub>N (304.2 μL, 2.2 mmol, 1.1 equiv) as starting materials to afford **1t** as a yellow oil.

**Yield** 662.2 mg (58%).

**NMR Spectroscopy:**

<sup>1</sup>H NMR (400 MHz, Chloroform-*d*) δ 8.11 (d, *J* = 2.4 Hz, 1H), 7.95 – 7.83 (m, 3H), 7.55 (t, *J* = 7.5 Hz, 1H), 7.48 – 7.35 (m, 5H), 7.03 (d, *J* = 8.4 Hz, 1H), 5.19 (s, 2H), 4.06 (t, *J* = 6.7 Hz, 2H), 3.63 (s, 2H), 3.10 (s, 3H), 2.47 (s, 3H), 2.20 (t, *J* = 7.4 Hz, 2H), 1.60 – 1.44 (m, 5H), 1.26 – 1.17 (m, 2H).

<sup>13</sup>C NMR (151 MHz, Chloroform-*d*) δ 190.9, 178.3, 171.6, 160.6, 146.9, 140.6, 136.5, 135.7, 132.9, 132.6, 131.0, 130.3, 129.6, 129.5, 129.4, 128.1, 127.9, 125.3, 121.2, 73.8, 64.9, 40.4, 38.3, 32.4, 28.4, 25.5, 23.5, 21.9.

**HRMS** (ESI) *m/z*: [M + H]<sup>+</sup> calcd for C<sub>30</sub>H<sub>32</sub>NO<sub>8</sub>S<sup>+</sup>: 566.1843, found: 566.1838.

**Methyl 6-(benzyl(tosyloxy)amino)-6-oxohexanoate (1w)**

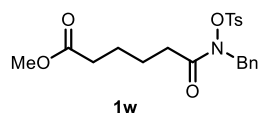

Prepared following **General Procedure A** using 6-methoxy-6-oxohexanoic acid (296.0  $\mu\text{L}$ , 2.0 mmol, 1.0 equiv), *N*-benzylhydroxylamine hydrochloride (351.1 mg, 2.2 mmol, 1.1 equiv) and  $\text{Et}_3\text{N}$  (304.2  $\mu\text{L}$ , 2.2 mmol, 1.1 equiv) as starting materials to afford **1w** as a colourless oil.

**Yield** 450.6 mg (54%).

**NMR Spectroscopy:**

**$^1\text{H}$  NMR** (400 MHz, Chloroform-*d*)  $\delta$  7.82 – 7.76 (m, 2H), 7.33 (d,  $J$  = 8.1 Hz, 2H), 7.23 – 7.19 (m, 3H), 7.09 – 7.07 (m, 2H), 4.84 – 4.56 (m, 2H), 3.58 (s, 3H), 2.42 (s, 3H), 2.16 – 2.10 (m, 4H), 1.41 – 1.37 (m, 4H).

**$^{13}\text{C}$  NMR** (101 MHz, Chloroform-*d*)  $\delta$  177.6, 173.8, 147.0, 135.0, 131.0, 130.4, 129.5, 129.0, 128.7, 128.2, 53.9, 51.7, 33.8, 32.7, 24.3, 23.3, 22.0.

**HRMS** (ESI)  $m/z$ :  $[\text{M} + \text{H}]^+$  calcd for  $\text{C}_{21}\text{H}_{26}\text{NO}_6\text{S}^+$ : 420.1746, found: 420.1472.

**6-(Methyl(tosyloxy)amino)-6-oxohexyl 3-(4,5-diphenyloxazol-2-yl)propanoate (1x)**

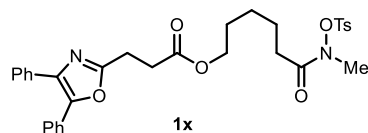

Prepared following **General Procedure B** using oxaprozin (440.0 mg, 1.5 mmol, 1.0 equiv), *N*-methylhydroxylamine hydrochloride (100.0 mg, 1.1 mmol) and  $\text{Et}_3\text{N}$  (152.1  $\mu\text{L}$ , 1.1 mmol) as starting materials to afford **1x** as a colourless oil.

**Yield** 502.4 mg (57%).

**NMR Spectroscopy:**

**$^1\text{H}$  NMR** (400 MHz, Chloroform-*d*)  $\delta$  7.92 – 7.84 (m, 2H), 7.66 – 7.60 (m, 2H), 7.59 – 7.55 (m, 2H), 7.43 – 7.29 (m, 8H), 4.08 (t,  $J$  = 6.6 Hz, 2H), 3.19 (d,  $J$  = 8.3 Hz, 2H), 3.09 (s, 3H), 2.91 (d,  $J$  = 8.4 Hz, 2H), 2.47 (s, 3H), 2.20 (t,  $J$  = 7.4 Hz, 2H), 1.59 – 1.44 (m, 4H), 1.26 – 1.20 (m, 2H).

**$^{13}\text{C}$  NMR** (101 MHz, Chloroform-*d*)  $\delta$  178.4, 172.2, 162.0, 146.9, 145.6, 135.2, 132.5, 131.0, 130.3, 129.5, 129.1, 128.8, 128.7, 128.6, 128.2, 128.0, 126.6, 64.8, 38.3, 32.4, 31.3, 28.4, 25.5, 23.7, 23.5, 22.0.

**HRMS** (ESI)  $m/z$ :  $[\text{M} + \text{H}]^+$  calcd for  $\text{C}_{32}\text{H}_{35}\text{N}_2\text{O}_7\text{S}^+$ : 591.2159, found: 591.2141.

***N*-Benzyl-6-(4-butyrylphenoxy)-*N*-(tosyloxy)hexanamide (1y)**

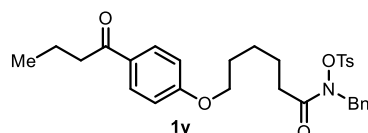

Prepared following **General Procedure B** using 1-(4-hydroxyphenyl)butan-1-one (335.1 mg, 2.0 mmol, 1.0 equiv), *N*-benzylhydroxylamine hydrochloride (351.2 mg, 2.2 mmol, 1.1 equiv) and  $\text{Et}_3\text{N}$  (304.2  $\mu\text{L}$ , 2.2 mmol, 1.1 equiv) as starting materials to afford **1y** as a colourless oil.

**Yield** 912.0 mg (85%).

**NMR Spectroscopy:**

**<sup>1</sup>H NMR** (400 MHz, Chloroform-*d*)  $\delta$  7.95 (d,  $J$  = 8.4 Hz, 2H), 7.88 (d,  $J$  = 7.9 Hz, 2H), 7.41 (d,  $J$  = 8.0 Hz, 2H), 7.20 – 7.15 (m, 2H), 6.91 (d,  $J$  = 8.4 Hz, 2H), 4.72 (s, 2H), 3.97 (t,  $J$  = 6.4 Hz, 2H), 2.92 (t,  $J$  = 7.3 Hz, 2H), 2.50 (s, 3H), 2.27 (t,  $J$  = 7.3 Hz, 2H), 1.81 – 1.69 (m, 4H), 1.53 (d,  $J$  = 7.8 Hz, 2H), 1.33 (dd,  $J$  = 14.6, 6.8 Hz, 2H), 1.02 (t,  $J$  = 7.4 Hz, 3H).

**<sup>13</sup>C NMR** (101 MHz, Chloroform-*d*)  $\delta$  199.2, 178.0, 162.9, 146.9, 135.0, 131.1, 130.4, 130.4, 130.2, 129.5, 129.0, 128.6, 128.2, 114.2, 68.0, 53.9, 40.3, 32.9, 28.9, 25.5, 23.6, 22.0, 18.2, 14.1.

**HRMS** (ESI)  $m/z$ :  $[M + H]^+$  calcd for C<sub>30</sub>H<sub>36</sub>NO<sub>6</sub>S<sup>+</sup>: 538.2258, found: 538.2253.

**6-(Benzyl(tosyloxy)amino)-6-oxohexyl 4-phenylbutanoate (1z)**

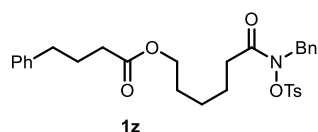

Prepared following **General Procedure B** using 4-phenylbutyric acid (328.4 mg, 2.0 mmol, 1.0 equiv), *N*-benzylhydroxylamine hydrochloride (351.2 mg, 2.2 mmol, 1.1 equiv) and Et<sub>3</sub>N (304.2  $\mu$ L, 2.2 mmol, 1.1 equiv) as starting materials to afford **1z** as a colourless oil.

**Yield** 342.5 mg (32%).

**NMR Spectroscopy:**

**<sup>1</sup>H NMR** (400 MHz, Chloroform-*d*)  $\delta$  7.88 (d,  $J$  = 7.9 Hz, 2H), 7.42 (d,  $J$  = 8.0 Hz, 2H), 7.31 (d,  $J$  = 8.4 Hz, 5H), 7.25 – 7.15 (m, 5H), 4.72 (s, 2H), 4.02 (t,  $J$  = 6.7 Hz, 2H), 2.68 (t,  $J$  = 7.6 Hz, 2H), 2.51 (s, 3H), 2.35 (t,  $J$  = 7.5 Hz, 2H), 2.24 (t,  $J$  = 7.3 Hz, 2H), 1.99 (q,  $J$  = 7.6 Hz, 2H), 1.57 – 1.48 (m, 4H), 1.22 (t,  $J$  = 7.8 Hz, 2H).

**<sup>13</sup>C NMR** (151 MHz, Chloroform-*d*)  $\delta$  177.9, 173.7, 146.9, 141.6, 135.0, 131.1, 130.4, 129.5, 129.0, 128.6, 128.5, 128.2, 126.1, 64.3, 53.9, 35.3, 33.8, 32.9, 28.5, 26.7, 25.4, 23.5, 22.0.

**HRMS** (ESI)  $m/z$ :  $[M + Na]^+$  calcd for C<sub>30</sub>H<sub>35</sub>NO<sub>6</sub>SNa<sup>+</sup>: 560.2077, found: 560.2076.

***N*-Methyl-5-phenyl-*N*-(tosyloxy)pentanamide (1aa)**

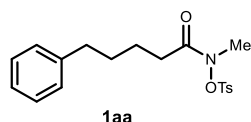

Prepared following **General Procedure A** using 5-phenylvaleric acid (356.5 mg, 2.0 mmol, 1.0 equiv), *N*-methylhydroxylamine hydrochloride (200.0 mg, 2.2 mmol, 1.1 equiv) and Et<sub>3</sub>N (304.2  $\mu$ L, 2.2 mmol, 1.1 equiv) as starting materials to afford **1aa** as a colourless oil.

**Yield** 602.4 mg (83%).

**NMR Spectroscopy:**

**<sup>1</sup>H NMR** (400 MHz, Chloroform-*d*)  $\delta$  7.92 – 7.87 (m, 2H), 7.41 (d,  $J$  = 8.1 Hz,



2H), 7.32 – 7.28 (m, 2H), 7.23 – 7.15 (m, 3H), 3.15 (s, 3H), 2.56 (t,  $J = 7.1$  Hz, 2H), 2.47 (s, 3H), 2.23 (t,  $J = 6.8$  Hz, 2H), 1.56 – 1.47 (m, 4H).

**$^{13}\text{C}$  NMR** (101 MHz, Chloroform-*d*)  $\delta$  178.4, 146.9, 142.3, 130.9, 130.3, 129.5, 128.5, 128.4, 125.9, 38.4, 35.7, 32.4, 30.9, 23.6, 21.9.

**HRMS** (ESI)  $m/z$ :  $[\text{M} + \text{Na}]^+$  calcd for  $\text{C}_{19}\text{H}_{23}\text{NO}_4\text{SNa}^+$ : 384.1240, found: 384.1229.

#### 4. General procedures for the synthesis of $\alpha$ , $\beta$ - unsaturated secondary amides

##### (*E*)-*N*-Benzylpent-2-enamide (**2a**)

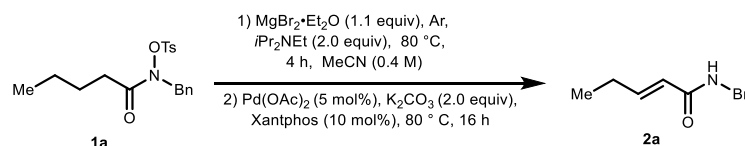

Under argon atmosphere, *N*-benzyl-*N*-(tosyloxy)pentanamide **1a** (72.3 mg, 0.20 mmol, 1.0 equiv), magnesium bromide ethyl etherate (56.8 mg, 0.22 mmol, 1.1 equiv), dry acetonitrile (0.5 mL) and *N*-ethyldiisopropylamine (69.0  $\mu$ L, 0.40 mmol, 2.0 equiv) were added successively to a 10 mL Schlenk tube with a magnetic bar. The sealed tube was then stirred at 80 °C for 4 h or more until the starting materials were consumed completely.

Then palladium (II) acetate (2.3 mg, 0.01 mmol, 0.05 equiv), Xantphos (11.6 mg, 0.02 mmol, 0.10 equiv) and K<sub>2</sub>CO<sub>3</sub> (55.5 mg, 0.40 mmol, 2.0 equiv) were added to the mixture under argon atmosphere. The sealed tube was then vigorously stirred at 80 °C for 16 h. The mixture was filtered through a pad of silica gel and the filtrate was concentrated under reduced pressure. The residual was purified by column chromatography on silica gel (eluent: petroleum ether/ ethyl acetate =3:1) to afford (*E*)-*N*-benzylpent-2-enamide **2a** as a white solid.

R<sub>f</sub> = 0.4 (Eluent: petroleum ether/ethyl acetate = 3:1).

Yield 28.5 mg (75%).

##### NMR Spectroscopy:

<sup>1</sup>H NMR (600 MHz, Chloroform-*d*)  $\delta$  7.36 – 7.22 (m, 5H), 6.87 (dt, *J* = 15.3, 6.4 Hz, 1H), 6.34 (br, 1H), 5.81 (d, *J* = 15.3 Hz, 1H), 4.44 (d, *J* = 5.8 Hz, 2H), 2.20 – 2.13 (m, 2H), 1.03 (t, *J* = 7.4 Hz, 3H).

<sup>13</sup>C NMR (101 MHz, Chloroform-*d*)  $\delta$  166.3, 146.4, 138.5, 128.7, 127.8, 127.4, 122.6, 43.6, 25.1, 12.5.

HRMS (ESI) *m/z*: [M + Na]<sup>+</sup> calcd for C<sub>12</sub>H<sub>15</sub>NONa<sup>+</sup>: 212.1046, found: 212.1047.

##### *N*-Benzylcinnamamide (**2b**)

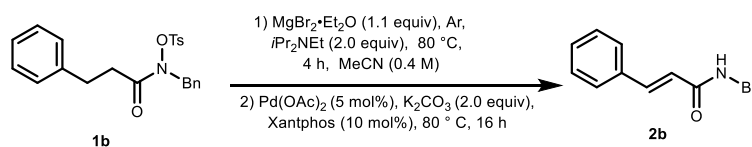

Under argon atmosphere, *N*-benzyl-3-phenyl-*N*-(tosyloxy)propanamide **1b** (81.9 mg, 0.20 mmol, 1.0 equiv), magnesium bromide ethyl etherate (56.8 mg, 0.22 mmol, 1.1 equiv), dry acetonitrile (0.5 mL) and *N*-ethyldiisopropylamine (69.0  $\mu$ L, 0.40 mmol, 2.0 equiv) were added successively to a 10 mL Schlenk tube with a magnetic bar. The sealed tube was then stirred at 80 °C for 4 h or more until the starting materials were consumed completely.

Then palladium (II) acetate (2.3 mg, 0.01 mmol, 0.05 equiv), Xantphos (11.6 mg, 0.02 mmol, 0.10 equiv) and K<sub>2</sub>CO<sub>3</sub> (55.5 mg, 0.40 mmol, 2.0 equiv) were added to the mixture under argon atmosphere. The sealed tube was then vigorously stirred at 80 °C for 16 h. The mixture was filtered through a pad of silica gel and the filtrate was concentrated under reduced pressure. The residual was purified by column chromatography on silica gel (eluent: petroleum ether/ ethyl acetate =2:1) to afford *N*-benzylcinnamamide **2b** as a white solid.

**R<sub>f</sub>** = 0.5 (Eluent: petroleum ether/ethyl acetate = 2:1).

**Yield** 30.8 mg (65%).

**NMR Spectroscopy:**

**<sup>1</sup>H NMR** (400 MHz, Chloroform-*d*) δ 7.64 (d, *J* = 15.6 Hz, 1H), 7.47 – 7.42 (m, 2H), 7.36 – 7.25 (m, 8H), 6.51 – 6.38 (m, 2H), 4.52 (d, *J* = 5.8 Hz, 2H).

**<sup>13</sup>C NMR** (101 MHz, Chloroform-*d*) δ 166.0, 141.4, 138.3, 134.9, 129.8, 128.9, 128.8, 127.9, 127.9, 127.6, 120.7, 43.9.

**HRMS** (ESI) *m/z*: [M + H]<sup>+</sup> calcd for C<sub>16</sub>H<sub>16</sub>NO<sup>+</sup>: 238.1227, found: 238.1224.

**(*E*)-*N*-Benzyl-3-(4-fluorophenyl)acrylamide (2c)**

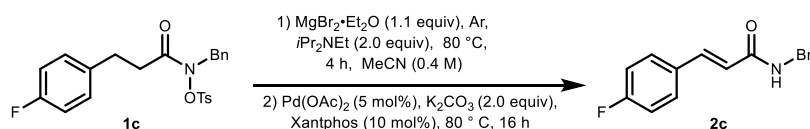

Under argon atmosphere, *N*-benzyl-3-(4-fluorophenyl)-*N*-(tosyloxy)propanamide **1c** (85.5 mg, 0.20 mmol, 1.0 equiv), magnesium bromide ethyl etherate (56.8 mg, 0.22 mmol, 1.1 equiv), dry acetonitrile (0.5 mL) and *N*-ethyldiisopropylamine (69.0 μL, 0.40 mmol, 2.0 equiv) were added successively to a 10 mL Schlenk tube with a magnetic bar. The sealed tube was then stirred at 80 °C for 4 h or more until the starting materials were consumed completely.

Then palladium (II) acetate (2.3 mg, 0.01 mmol, 0.05 equiv), Xantphos (11.6 mg, 0.02 mmol, 0.10 equiv) and K<sub>2</sub>CO<sub>3</sub> (55.5 mg, 0.40 mmol, 2.0 equiv) were added to the mixture under argon atmosphere. The sealed tube was then vigorously stirred at 80 °C for 16 h. The mixture was filtered through a pad of silica gel and the filtrate was concentrated under reduced pressure. The residual was purified by column chromatography on silica gel (eluent: petroleum ether/ ethyl acetate =2:1) to afford (*E*)-*N*-benzyl-3-(4-fluorophenyl)acrylamide **2c** as a white solid.

**R<sub>f</sub>** = 0.5 (Eluent: petroleum ether/ethyl acetate = 2:1).

**Yield** 29.0 mg (57%).

**NMR Spectroscopy:**

**<sup>1</sup>H NMR** (400 MHz, Chloroform-*d*) δ 7.62 (d, *J* = 15.5 Hz, 1H), 7.49 – 7.42 (m, 2H), 7.38 – 7.26 (m, 5H), 7.07 – 6.97 (m, 2H), 6.35 (d, *J* = 15.6 Hz, 1H), 6.11 (s, 1H), 4.55 (d, *J* = 5.7 Hz, 2H).

**<sup>13</sup>C NMR** (101 MHz, Chloroform-*d*) δ 165.8, 163.7 (d, *J* = 251.5 Hz), 140.3, 138.3, 131.1 (d, *J* = 3.0 Hz), 129.7 (d, *J* = 6.1 Hz), 128.9, 128.0, 127.7, 120.4, 116.1 (d, *J*

= 14.1 Hz), 44.0.

<sup>19</sup>F NMR (377 MHz, Chloroform-*d*) δ -110.57.

HRMS (ESI) *m/z*: [M + H]<sup>+</sup> calcd for C<sub>16</sub>H<sub>15</sub>FNO<sup>+</sup>: 256.1132, found: 256.1129.

### (*E*)-*N*-Benzyl-3-(4-methoxyphenyl)acrylamide (**2d**)

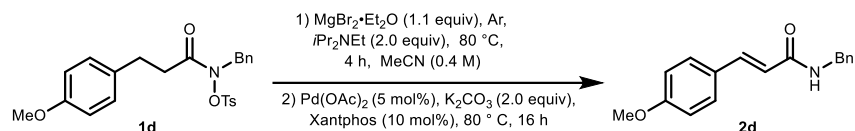

Under argon atmosphere, *N*-benzyl-3-(4-methoxyphenyl)-*N*-(tosyloxy)propanamide **1d** (87.8 mg, 0.20 mmol, 1.0 equiv), magnesium bromide ethyl etherate (56.8 mg, 0.22 mmol, 1.1 equiv), dry acetonitrile (0.5 mL) and *N*-ethyldiisopropylamine (69.0 μL, 0.40 mmol, 2.0 equiv) were added successively to a 10 mL Schlenk tube with a magnetic bar. The sealed tube was then stirred at 80 °C for 4 h or more until the starting materials were consumed completely.

Then palladium (II) acetate (2.3 mg, 0.01 mmol, 0.05 equiv), Xantphos (11.6 mg, 0.02 mmol, 0.10 equiv) and K<sub>2</sub>CO<sub>3</sub> (55.5 mg, 0.40 mmol, 2.0 equiv) were added to the mixture under argon atmosphere. The sealed tube was then vigorously stirred at 80 °C for 16 h. The mixture was filtered through a pad of silica gel and the filtrate was concentrated under reduced pressure. The residual was purified by column chromatography on silica gel (eluent: petroleum ether/ ethyl acetate =2:1) to afford (*E*)-*N*-benzyl-3-(4-methoxyphenyl)acrylamide **2d** as a yellow solid.

R<sub>f</sub> = 0.1 (Eluent: petroleum ether/ethyl acetate = 2:1).

Yield 22.5 mg (42%).

#### NMR Spectroscopy:

<sup>1</sup>H NMR (400 MHz, Chloroform-*d*) δ 7.63 (d, *J* = 15.6 Hz, 1H), 7.44 (d, *J* = 8.7 Hz, 2H), 7.39 – 7.27 (m, 5H), 6.88 (d, *J* = 8.7 Hz, 2H), 6.28 (d, *J* = 15.5 Hz, 1H), 5.86 (s, 1H), 4.57 (d, *J* = 5.6 Hz, 2H), 3.83 (s, 3H).

<sup>13</sup>C NMR (101 MHz, Chloroform-*d*) δ 166.2, 161.1, 141.2, 138.5, 129.5, 128.9, 128.1, 127.7, 127.6, 118.1, 114.4, 55.5, 44.0.

HRMS (ESI) *m/z*: [M + H]<sup>+</sup> calcd for C<sub>17</sub>H<sub>18</sub>NO<sub>2</sub><sup>+</sup>: 268.1332, found: 268.1331.

### (*E*)-*N*-Benzyl-3-(4-(trifluoromethyl)phenyl)acrylamide (**2e**)

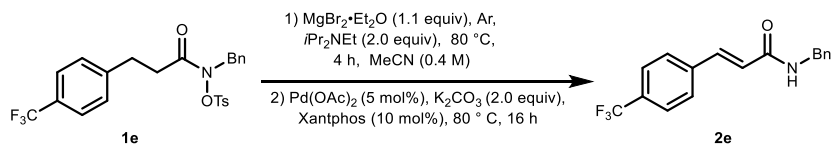

Under argon atmosphere, *N*-benzyl-*N*-(tosyloxy)-3-(4-(trifluoromethyl)phenyl)propanamide **1e** (92.5 mg, 0.20 mmol, 1.0 equiv), magnesium bromide ethyl etherate (56.8 mg, 0.22 mmol, 1.1 equiv), dry acetonitrile (0.5 mL) and *N*-ethyldiisopropylamine (69.0 μL, 0.40 mmol, 2.0 equiv) were added successively to a 10 mL Schlenk tube with a magnetic bar. The sealed tube was then stirred at 80 °C for 4 h or more until the starting materials were consumed completely.

Then palladium (II) acetate (2.3 mg, 0.01 mmol, 0.05 equiv), Xantphos (11.6 mg, 0.02 mmol, 0.10 equiv) and K<sub>2</sub>CO<sub>3</sub> (55.5 mg, 0.40 mmol, 2.0 equiv) were added to the mixture under argon atmosphere. The sealed tube was then vigorously stirred at 80 °C for 16 h. The mixture was filtered through a pad of silica gel and the filtrate was concentrated under reduced pressure. The residual was purified by column chromatography on silica gel (eluent: DCM/MeOH = 100:1) to afford (*E*)-*N*-benzyl-3-(4-(trifluoromethyl)phenyl)acrylamide **2e** as a yellow solid.

**R<sub>f</sub>** = 0.5 (Eluent: DCM/MeOH = 100:1).

**Yield** 43.4 mg (71%).

**NMR Spectroscopy:**

**<sup>1</sup>H NMR** (400 MHz, Chloroform-*d*) δ 7.75 – 7.57 (m, 5H), 7.33 (q, *J* = 7.5 Hz, 5H), 6.48 (d, *J* = 15.6 Hz, 1H), 5.99 (br, 1H), 4.59 (d, *J* = 5.6 Hz, 2H).

**<sup>13</sup>C NMR** (101 MHz, Chloroform-*d*) δ 165.4, 139.7, 138.3, 138.1, 131.4 (q, *J* = 33.3 Hz), 128.9, 128.01, 127.97, 127.8, 125.9 (q, *J* = 4.0 Hz), 124.0 (q, *J* = 272.7 Hz), 123.2, 44.0.

**<sup>19</sup>F NMR** (376 MHz, Chloroform-*d*) δ -62.78.

**HRMS** (ESI) *m/z*: [M + H]<sup>+</sup> calcd for C<sub>17</sub>H<sub>15</sub>F<sub>3</sub>NO<sup>+</sup>: 306.1100, found: 306.1097.

***N*-Benzyl-3-(4,5-diphenyloxazol-2-yl)acrylamide (2f)**

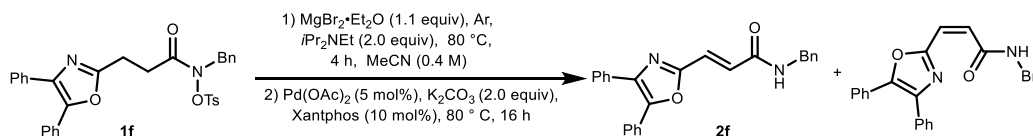

Under argon atmosphere, *N*-benzyl-3-(4,5-diphenyloxazol-2-yl)-*N*-(tosyloxy)propanamide **1f** (110.5 mg, 0.20 mmol, 1.0 equiv), magnesium bromide ethyl etherate (56.8 mg, 0.22 mmol, 1.1 equiv), dry acetonitrile (0.5 mL) and *N*-ethyl-diisopropylamine (69.0 μL, 0.40 mmol, 2.0 equiv) were added successively to a 10 mL Schlenk tube with a magnetic bar. The sealed tube was then stirred at 80 °C for 4 h or more until the starting materials were consumed completely.

Then palladium (II) acetate (2.3 mg, 0.01 mmol, 0.05 equiv), Xantphos (11.6 mg, 0.02 mmol, 0.10 equiv) and K<sub>2</sub>CO<sub>3</sub> (55.5 mg, 0.40 mmol, 2.0 equiv) were added to the mixture under argon atmosphere. The sealed tube was then vigorously stirred at 80 °C for 16 h. The mixture was filtered through a pad of silica gel and the filtrate was concentrated under reduced pressure. The residual was purified by column chromatography on silica gel (eluent: petroleum ether/ ethyl acetate = 2:1) to afford *N*-benzyl-3-(4,5-diphenyloxazol-2-yl)acrylamide **2f** as a yellow solid.

**R<sub>f</sub>** = 0.3 (Eluent: petroleum ether/ethyl acetate = 2:1).

**Yield** 67.1 mg (88%). (E/Z = 1:1)

**NMR Spectroscopy:(E/Z mixture)**

**<sup>1</sup>H NMR** (600 MHz, Chloroform-*d*) δ 11.17 (br, 1H), 7.65 – 7.62 (m, 2H), 7.60 – 7.55 (m, 4H), 7.51 (d, *J* = 15.5 Hz, 1H), 7.39 – 7.30 (m, 16H), 7.29 – 7.24 (m, 8H), 6.93 (d, *J* = 15.5 Hz, 1H), 6.64 (d, *J* = 13.8 Hz, 1H), 6.46 (br, 1H), 6.31 (d, *J* = 13.8

Hz, 1H), 4.60 (d,  $J = 5.3$  Hz, 2H), 4.57 (d,  $J = 5.7$  Hz, 2H).

$^{13}\text{C}$  NMR (101 MHz, Chloroform- $d$ )  $\delta$  164.6, 164.5, 158.2, 157.6, 146.6, 146.3, 138.2, 137.9, 137.6, 136.2, 132.0, 131.8, 131.0, 129.6, 129.2, 128.94, 128.86, 128.82, 128.75, 128.7, 128.6, 128.4, 128.3, 128.1, 128.0, 127.8, 127.7, 127.51, 127.45, 127.0, 126.8, 125.7, 118.3, 44.2, 44.1.

HRMS (ESI)  $m/z$ :  $[\text{M} + \text{Na}]^+$  calcd for  $\text{C}_{25}\text{H}_{20}\text{N}_2\text{O}_2\text{Na}^+$ : 403.1417, found: 403.1413.

### (*E*)-*N*-Benzyl-4,4,4-trifluorobut-2-enamide (2g)

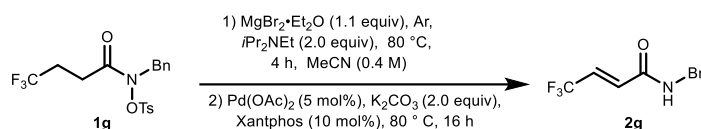

Under argon atmosphere, *N*-benzyl-4,4,4-trifluoro-*N*-(tosyloxy)butanamide **1g** (80.3 mg, 0.20 mmol, 1.0 equiv), magnesium bromide ethyl etherate (56.8 mg, 0.22 mmol, 1.1 equiv), dry acetonitrile (0.5 mL) and *N*-ethyl-diisopropylamine (69.0  $\mu\text{L}$ , 0.40 mmol, 2.0 equiv) were added successively to a 10 mL Schlenk tube with a magnetic bar. The sealed tube was then stirred at  $80^\circ\text{C}$  for 4 h or more until the starting materials were consumed completely.

Then palladium (II) acetate (2.3 mg, 0.01 mmol, 0.05 equiv), Xantphos (11.6 mg, 0.02 mmol, 0.10 equiv) and  $\text{K}_2\text{CO}_3$  (55.5 mg, 0.40 mmol, 2.0 equiv) were added to the mixture under argon atmosphere. The sealed tube was then vigorously stirred at  $80^\circ\text{C}$  for 16 h. The mixture was filtered through a pad of silica gel and the filtrate was concentrated under reduced pressure. The residual was purified by column chromatography on silica gel (eluent: petroleum ether/ ethyl acetate =5:1) to afford (*E*)-*N*-benzyl-4,4,4-trifluorobut-2-enamide **2g** as a white solid.

$R_f = 0.6$  (Eluent: petroleum ether/ ethyl acetate =5:1).

Yield 22.8 mg (50%).

### NMR Spectroscopy:

$^1\text{H}$  NMR (400 MHz, Chloroform- $d$ )  $\delta$  7.40 – 7.24 (m, 5H), 6.83 – 6.69 (m, 1H), 6.49 (dq,  $J = 15.4, 2.0$  Hz, 1H), 6.26 (br, 1H), 4.51 (d,  $J = 5.7$  Hz, 2H).

$^{13}\text{C}$  NMR (101 MHz, Chloroform- $d$ )  $\delta$  162.6, 137.2, 130.7 (q,  $J = 6.1$  Hz), 129.0, 128.9 (q,  $J = 35.4$  Hz), 128.09, 128.07, 122.6 (q,  $J = 270.7$  Hz), 44.3.

$^{19}\text{F}$  NMR (376 MHz, Chloroform- $d$ )  $\delta$  -65.06.

HRMS (ESI)  $m/z$ :  $[\text{M} + \text{H}]^+$  calcd for  $\text{C}_{11}\text{H}_{11}\text{FNO}^+$ : 230.0787, found: 230.0786.

### (*E*)-*N*-Benzyl-6-(naphthalen-2-yloxy)hex-2-enamide (2h)

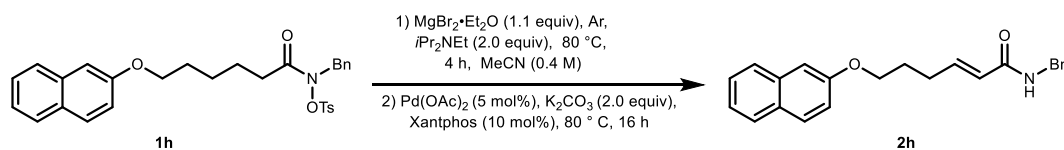

Under argon atmosphere, *N*-benzyl-6-(naphthalen-2-yloxy)-*N*-(tosyloxy)hexanamide **1h** (103.5 mg, 0.20 mmol, 1.0 equiv), magnesium bromide ethyl etherate (56.8 mg, 0.22 mmol, 1.1 equiv), dry acetonitrile (0.5 mL) and *N*-ethyl-diisopropylamine (69.0  $\mu\text{L}$ , 0.40

mmol, 2.0 equiv) were added successively to a 10 mL Schlenk tube with a magnetic bar. The sealed tube was then stirred at 80 °C for 4 h or more until the starting materials were consumed completely.

Then palladium (II) acetate (2.3 mg, 0.01 mmol, 0.05 equiv), Xantphos (11.6 mg, 0.02 mmol, 0.10 equiv) and K<sub>2</sub>CO<sub>3</sub> (55.5 mg, 0.40 mmol, 2.0 equiv) were added to the mixture under argon atmosphere. The sealed tube was then vigorously stirred at 80 °C for 16 h. The mixture was filtered through a pad of silica gel and the filtrate was concentrated under reduced pressure. The residual was purified by column chromatography on silica gel (eluent: petroleum ether/ ethyl acetate =2:1) to afford (*E*)-*N*-benzyl-6-(naphthalen-2-yloxy)hex-2-enamide **2h** as a yellow solid.

**R<sub>f</sub>** = 0.5 (Eluent: petroleum ether/ethyl acetate = 2:1).

**Yield** 62.2 mg (90%).

**NMR Spectroscopy:**

<sup>1</sup>H NMR (400 MHz, Chloroform-*d*) δ 7.78 – 7.67 (m, 3H), 7.42 (t, *J* = 7.5 Hz, 1H), 7.34 – 7.25 (m, 6H), 7.16 – 7.08 (m, 2H), 6.94 (dt, *J* = 14.5, 6.9 Hz, 1H), 5.83 (d, *J* = 15.1 Hz, 1H), 5.71 (br, 1H), 4.49 (d, *J* = 5.3 Hz, 2H), 4.09 (t, *J* = 6.1 Hz, 2H), 2.43 (q, *J* = 7.2 Hz, 2H), 2.08 – 1.97 (m, 2H).

<sup>13</sup>C NMR (101 MHz, Chloroform-*d*) δ 165.8, 157.0, 144.2, 138.4, 134.7, 129.5, 129.1, 128.9, 128.0, 127.8, 127.7, 126.9, 126.5, 124.3, 123.7, 119.0, 106.8, 66.9, 43.8, 28.7, 28.0.

**HRMS** (ESI) *m/z*: [M + Na]<sup>+</sup> calcd for C<sub>23</sub>H<sub>23</sub>NO<sub>2</sub>Na<sup>+</sup>: 368.1621, found: 368.1619.

**(2*E*,9*Z*,12*Z*)-*N*-Benzyloctadeca-2,9,12-trienamide (2i)**

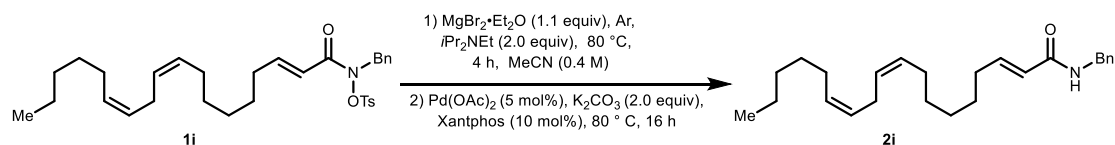

Under argon atmosphere, (*2E,9Z,12Z*)-*N*-benzyl-*N*-(tosyloxy)octadeca-2,9,12-trienamide **1i** (108.0 mg, 0.20 mmol, 1.0 equiv), magnesium bromide ethyl etherate (56.8 mg, 0.22 mmol, 1.1 equiv), dry acetonitrile (0.5 mL) and *N*-ethyl-diisopropylamine (69.0 μL, 0.40 mmol, 2.0 equiv) were added successively to a 10 mL Schlenk tube with a magnetic bar. The sealed tube was then stirred at 80 °C for 4 h or more until the starting materials were consumed completely.

Then palladium (II) acetate (2.3 mg, 0.01 mmol, 0.05 equiv), Xantphos (11.6 mg, 0.02 mmol, 0.10 equiv) and K<sub>2</sub>CO<sub>3</sub> (55.5 mg, 0.40 mmol, 2.0 equiv) were added to the mixture under argon atmosphere. The sealed tube was then vigorously stirred at 80 °C for 16 h. The mixture was filtered through a pad of silica gel and the filtrate was concentrated under reduced pressure. The residual was purified by column chromatography on silica gel (eluent: petroleum ether/ ethyl acetate =2:1) to afford (*2E,9Z,12Z*)-*N*-benzyloctadeca-2,9,12-trienamide **2i** as a colourless oil.

**R<sub>f</sub>** = 0.1 (Eluent: petroleum ether/ethyl acetate = 2:1).

**Yield** 29.8 mg (41%).

### NMR Spectroscopy:

$^1\text{H}$  NMR (400 MHz, Chloroform-*d*)  $\delta$  7.34 – 7.25 (m, 5H), 6.87 (dt,  $J = 14.5$ , 6.9 Hz, 1H), 5.90 – 5.74 (m, 2H), 5.41 – 5.29 (m, 4H), 4.49 (d,  $J = 5.7$  Hz, 2H), 2.77 (t,  $J = 6.3$  Hz, 2H), 2.17 (q,  $J = 7.3$  Hz, 2H), 2.05 (q,  $J = 7.2$  Hz, 4H), 1.49 – 1.42 (m, 2H), 1.37 – 1.26 (m, 10H), 0.89 (t,  $J = 6.7$  Hz, 3H).

$^{13}\text{C}$  NMR (101 MHz, Chloroform-*d*)  $\delta$  166.0, 145.4, 138.5, 130.4, 130.0, 128.8, 128.3, 128.00, 127.96, 127.6, 123.4, 43.7, 32.2, 31.6, 29.55, 29.45, 28.9, 28.3, 27.3, 27.2, 25.7, 22.7, 14.2.

HRMS (ESI)  $m/z$ :  $[\text{M} + \text{Na}]^+$  calcd for  $\text{C}_{25}\text{H}_{37}\text{NONa}^+$ : 390.2767, found: 390.2762.

### (*E*)-*N*-Benzylundeca-2,10-dienamide (**2j**)

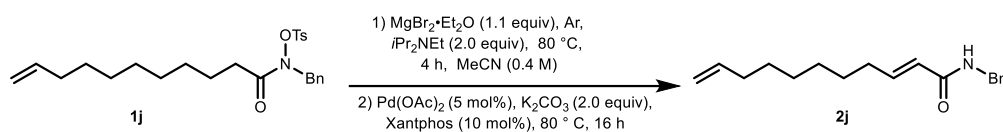

Under argon atmosphere, (*E*)-*N*-benzylundeca-2,10-dienamide **1j** (88.7 mg, 0.20 mmol, 1.0 equiv), magnesium bromide ethyl etherate (56.8 mg, 0.22 mmol, 1.1 equiv), dry acetonitrile (0.5 mL) and *N*-ethyldiisopropylamine (69.0  $\mu\text{L}$ , 0.40 mmol, 2.0 equiv) were added successively to a 10 mL Schlenk tube with a magnetic bar. The sealed tube was then stirred at 80 °C for 4 h or more until the starting materials were consumed completely.

Then palladium (II) acetate (2.3 mg, 0.01 mmol, 0.05 equiv), Xantphos (11.6 mg, 0.02 mmol, 0.10 equiv) and K<sub>2</sub>CO<sub>3</sub> (55.5 mg, 0.40 mmol, 2.0 equiv) were added to the mixture under argon atmosphere. The sealed tube was then vigorously stirred at 80 °C for 16 h. The mixture was filtered through a pad of silica gel and the filtrate was concentrated under reduced pressure. The residual was purified by column chromatography on silica gel (eluent: petroleum ether/ ethyl acetate =2:1) to afford (*E*)-*N*-benzylundeca-2,10-dienamide **2j** as a white solid.

$R_f = 0.6$  (Eluent: petroleum ether/ethyl acetate = 2:1).

Yield 34.6 mg (64%).

### NMR Spectroscopy:

$^1\text{H}$  NMR (400 MHz, Chloroform-*d*)  $\delta$  7.35 – 7.26 (m, 5H), 6.88 (dt,  $J = 14.6$ , 7.0 Hz, 1H), 5.78 (d,  $J = 14.4$  Hz, 2H), 5.51 – 5.28 (m, 1H), 5.02 – 4.92 (m, 1H), 4.50 (d,  $J = 5.5$  Hz, 2H), 2.17 (q,  $J = 7.4$  Hz, 2H), 2.04 (q,  $J = 7.1$  Hz, 2H), 1.79 (s, 1H), 1.64 – 1.59 (m, 1H), 1.47 – 1.29 (m, 7H).

$^{13}\text{C}$  NMR (101 MHz, Chloroform-*d*)  $\delta$  166.1, 145.5, 139.2, 138.5, 128.8, 128.0, 127.7, 123.4, 114.4, 43.8, 33.9, 32.2, 29.1, 29.0, 28.9, 28.3.

HRMS (ESI)  $m/z$ :  $[\text{M} + \text{H}]^+$  calcd for  $\text{C}_{18}\text{H}_{26}\text{NO}^+$ : 272.2009, found: 272.2003.

### (*E*)-6-(Benzylamino)-6-oxohex-4-en-1-yl benzoate (**2k**)

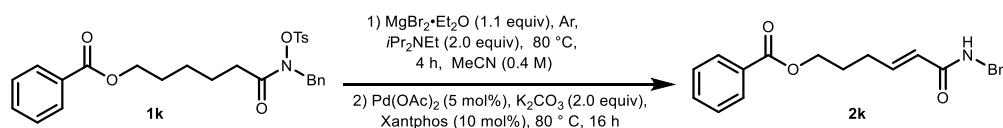



Under argon atmosphere, 6-(benzyl(tosyloxy)amino)-6-oxohexyl benzoate **1k** (99.1 mg, 0.20 mmol, 1.0 equiv), magnesium bromide ethyl etherate (56.8 mg, 0.22 mmol, 1.1 equiv), dry acetonitrile (0.5 mL) and *N*-ethyl-diisopropylamine (69.0  $\mu$ L, 0.40 mmol, 2.0 equiv) were added successively to a 10 mL Schlenk tube with a magnetic bar. The sealed tube was then stirred at 80 °C for 4 h or more until the starting materials were consumed completely.

Then palladium (II) acetate (2.3 mg, 0.01 mmol, 0.05 equiv), Xantphos (11.6 mg, 0.02 mmol, 0.10 equiv) and K<sub>2</sub>CO<sub>3</sub> (55.5 mg, 0.40 mmol, 2.0 equiv) were added to the mixture under argon atmosphere. The sealed tube was then vigorously stirred at 80 °C for 16 h. The mixture was filtered through a pad of silica gel and the filtrate was concentrated under reduced pressure. The residual was purified by column chromatography on silica gel (eluent: petroleum ether/ ethyl acetate =2:1) to afford (*E*)-6-(benzylamino)-6-oxohex-4-en-1-yl benzoate **2k** as a yellow solid.

R<sub>f</sub> = 0.4 (Eluent: petroleum ether/ ethyl acetate =2:1).

Yield 34.4 mg (53%).

#### NMR Spectroscopy:

<sup>1</sup>H NMR (400 MHz, Chloroform-*d*)  $\delta$  8.02 (d, *J* = 7.6 Hz, 2H), 7.55 (t, *J* = 7.4 Hz, 1H), 7.43 (t, *J* = 7.6 Hz, 2H), 7.35 – 7.24 (m, 5H), 6.90 (dt, *J* = 14.6, 6.9 Hz, 1H), 6.00 (br, 1H), 5.85 (d, *J* = 15.3 Hz, 1H), 4.48 (d, *J* = 5.6 Hz, 2H), 4.32 (t, *J* = 6.4 Hz, 2H), 2.34 (q, *J* = 7.2 Hz, 2H), 1.95 – 1.88 (m, 2H).

<sup>13</sup>C NMR (101 MHz, Chloroform-*d*)  $\delta$  166.7, 165.7, 143.6, 138.3, 133.1, 130.3, 129.6, 128.8, 128.5, 127.9, 127.6, 124.3, 64.2, 43.7, 28.7, 27.5.

HRMS (ESI) *m/z*: [M + Na]<sup>+</sup> calcd for C<sub>20</sub>H<sub>21</sub>NO<sub>3</sub>Na<sup>+</sup>: 346.1413, found: 346.1413.

#### (*E*)-*N*-Benzyl-3-cyclopentylacrylamide (**2l**)

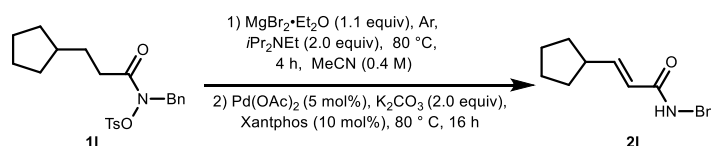

Under argon atmosphere, *N*-benzyl-3-cyclopentyl-*N*-(tosyloxy)propanamide **1l** (80.3 mg, 0.20 mmol, 1.0 equiv), magnesium bromide ethyl etherate (56.8 mg, 0.22 mmol, 1.1 equiv), dry acetonitrile (0.5 mL) and *N*-ethyl-diisopropylamine (69.0  $\mu$ L, 0.40 mmol, 2.0 equiv) were added successively to a 10 mL Schlenk tube with a magnetic bar. The sealed tube was then stirred at 80 °C for 4 h or more until the starting materials were consumed completely.

Then palladium (II) acetate (2.3 mg, 0.01 mmol, 0.05 equiv), Xantphos (11.6 mg, 0.02 mmol, 0.10 equiv) and K<sub>2</sub>CO<sub>3</sub> (55.5 mg, 0.40 mmol, 2.0 equiv) were added to the mixture under argon atmosphere. The sealed tube was then vigorously stirred at 80 °C for 16 h. The mixture was filtered through a pad of silica gel and the filtrate was concentrated under reduced pressure. The residual was purified by column chromatography on silica gel (eluent: petroleum ether/ ethyl acetate =2:1) to afford (*E*)-*N*-benzyl-3-cyclopentylacrylamide **2l** as a yellow solid.

$R_f = 0.5$  (Eluent: petroleum ether/ ethyl acetate =2:1).

**Yield** 27.0 mg (58%).

**NMR Spectroscopy:**

$^1\text{H NMR}$  (400 MHz, Chloroform-*d*)  $\delta$  7.35 – 7.26 (m, 5H), 6.85 (dd,  $J = 15.2, 8.0$  Hz, 1H), 5.93 (br, 1H), 5.77 (d,  $J = 15.2$  Hz, 1H), 4.48 (d,  $J = 5.7$  Hz, 2H), 2.60 – 2.50 (m, 1H), 1.85 – 1.79 (m, 2H), 1.73 – 1.55 (m, 4H), 1.42 – 1.33 (m, 2H).

$^{13}\text{C NMR}$  (151 MHz, Chloroform-*d*)  $\delta$  166.3, 149.5, 138.5, 128.8, 128.0, 127.9, 127.6, 121.6, 43.7, 42.8, 32.6, 25.3.

**HRMS** (ESI)  $m/z$ :  $[\text{M} + \text{H}]^+$  calcd for  $\text{C}_{15}\text{H}_{20}\text{NO}^+$ : 230.1540, found: 230.1538.

**(*E*)-*N*-Benzyl-3-cyclohexylacrylamide (2m)**

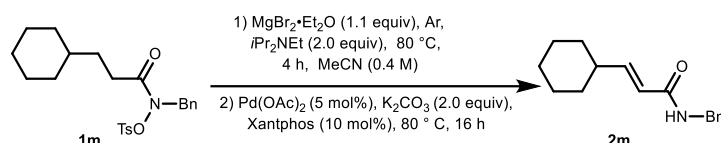

Under argon atmosphere, *N*-benzyl-3-cyclohexyl-*N*-(tosyloxy)propanamide **1m** (83.1 mg, 0.20 mmol, 1.0 equiv), magnesium bromide ethyl etherate (56.8 mg, 0.22 mmol, 1.1 equiv), dry acetonitrile (0.5 mL) and *N*-ethyldiisopropylamine (69.0  $\mu\text{L}$ , 0.40 mmol, 2.0 equiv) were added successively to a 10 mL Schlenk tube with a magnetic bar. The sealed tube was then stirred at 80 °C for 4 h or more until the starting materials were consumed completely.

Then palladium (II) acetate (2.3 mg, 0.01 mmol, 0.05 equiv), Xantphos (11.6 mg, 0.02 mmol, 0.10 equiv) and  $\text{K}_2\text{CO}_3$  (55.5 mg, 0.40 mmol, 2.0 equiv) were added to the mixture under argon atmosphere. The sealed tube was then vigorously stirred at 80 °C for 16 h. The mixture was filtered through a pad of silica gel and the filtrate was concentrated under reduced pressure. The residual was purified by column chromatography on silica gel (eluent: petroleum ether/ ethyl acetate =2:1) to afford (*E*)-*N*-benzyl-3-cyclohexylacrylamide **2m** as a white solid.

$R_f = 0.6$  (Eluent: petroleum ether/ ethyl acetate =2:1).

**Yield** 27.2 mg (56%).

**NMR Spectroscopy:**

$^1\text{H NMR}$  (400 MHz, Chloroform-*d*)  $\delta$  7.39 – 7.27 (m, 5H), 6.83 (dd,  $J = 15.4, 6.8$  Hz, 1H), 5.77 – 5.71 (m, 2H), 4.51 (d,  $J = 5.6$  Hz, 2H), 2.14 – 2.06 (m, 1H), 1.80 – 1.67 (m, 5H), 1.31 – 1.11 (m, 5H).

$^{13}\text{C NMR}$  (101 MHz, Chloroform-*d*)  $\delta$  166.4, 150.5, 138.5, 128.8, 128.1, 127.7, 121.0, 43.8, 40.4, 32.1, 26.1, 25.9.

**HRMS** (ESI)  $m/z$ :  $[\text{M} + \text{H}]^+$  calcd for  $\text{C}_{16}\text{H}_{22}\text{NO}^+$ : 244.1696, found: 244.1694.

***N*-(2-(Cyclohex-1-en-1-yl)ethyl)cinnamamide (2n)**

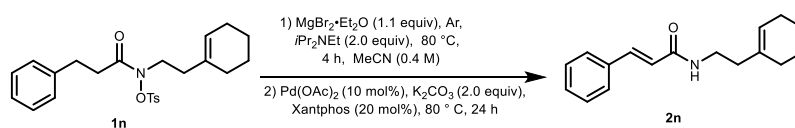

Under argon atmosphere, *N*-(2-(cyclohex-1-en-1-yl)ethyl)-3-phenyl-*N*-(tosyloxy)propanamide **1n** (85.5 mg, 0.20 mmol, 1.0 equiv), magnesium bromide ethyl etherate (56.8 mg, 0.22 mmol, 1.1 equiv), dry acetonitrile (0.5 mL) and *N*-ethyl-diisopropylamine (69.0  $\mu$ L, 0.40 mmol, 2.0 equiv) were added successively to a 10 mL Schlenk tube with a magnetic bar. The sealed tube was then stirred at 80 °C for 4 h or more until the starting materials were consumed completely.

Then palladium (II) acetate (4.6 mg, 0.02 mmol, 0.10 equiv), Xantphos (23.2 mg, 0.04 mmol, 0.20 equiv) and K<sub>2</sub>CO<sub>3</sub> (55.5 mg, 0.40 mmol, 2.0 equiv) were added to the mixture under argon atmosphere. The sealed tube was then vigorously stirred at 80 °C for 24 h. The mixture was filtered through a pad of silica gel and the filtrate was concentrated under reduced pressure. The residual was purified by column chromatography on silica gel (eluent: petroleum ether/ ethyl acetate =5:1) to afford *N*-(2-(cyclohex-1-en-1-yl)ethyl)cinnamamide **2n** as a white solid.

R<sub>f</sub> = 0.3 (Eluent: petroleum ether/ethyl acetate = 5:1).

Yield 31.3 mg (61%).

#### NMR Spectroscopy:

<sup>1</sup>H NMR (400 MHz, Chloroform-*d*)  $\delta$  7.63 (d, *J* = 15.6 Hz, 1H), 7.55 – 7.47 (m, 2H), 7.35 (q, *J* = 3.3, 2.0 Hz, 3H), 6.43 (d, *J* = 15.6 Hz, 1H), 5.89 (br, 1H), 5.52 (d, *J* = 3.9 Hz, 1H), 3.48 (q, *J* = 6.5 Hz, 2H), 2.22 (t, *J* = 7.0 Hz, 2H), 2.06 – 2.00 (m, 2H), 1.95 (d, *J* = 6.3 Hz, 2H), 1.68 – 1.61 (m, 2H), 1.61 – 1.54 (m, 2H).

<sup>13</sup>C NMR (101 MHz, Chloroform-*d*)  $\delta$  165.9, 140.8, 135.1, 134.8, 129.6, 128.9, 127.8, 123.6, 121.1, 37.7, 37.6, 28.1, 25.3, 22.9, 22.5.

HRMS (ESI) *m/z*: [M + H]<sup>+</sup> calcd for C<sub>17</sub>H<sub>22</sub>NO<sup>+</sup>: 256.1696, found: 256.1692.

#### *N*-((*Z*)-Octadec-9-en-1-yl)cinnamamide (**2o**)

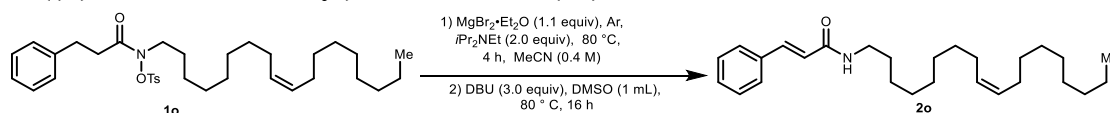

Under argon atmosphere, (*Z*)-*N*-(octadec-9-en-1-yl)-3-phenyl-*N*-(tosyloxy)propanamide **1o** (114.0 mg, 0.20 mmol, 1.0 equiv), magnesium bromide ethyl etherate (56.8 mg, 0.22 mmol, 1.1 equiv), dry acetonitrile (0.5 mL) and *N*-ethyl-diisopropylamine (69.0  $\mu$ L, 0.40 mmol, 2.0 equiv) were added successively to a 10 mL Schlenk tube with a magnetic bar. The sealed tube was then stirred at 80 °C for 4 h or more until the starting materials were consumed completely.

Then DBU (90.0  $\mu$ L, 0.60 mmol, 3.0 equiv) and dry DMSO (1.0 mL) were added to the mixture under argon atmosphere. The sealed tube was then vigorously stirred at 80 °C for 16 h before being washed with H<sub>2</sub>O (5.0 mL). The aqueous phase was extracted with ethyl acetate (3  $\times$  5.0 mL). After that, the organic phase was dried over anhydrous Na<sub>2</sub>SO<sub>4</sub>, filtered, and concentrated under reduced pressure. The residual was purified by column chromatography on silica gel (eluent: petroleum ether/ ethyl acetate =5:1) to afford *N*-((*Z*)-octadec-9-en-1-yl)cinnamamide **2o** as a white solid.

$R_f$  = 0.5 (Eluent: petroleum ether/ethyl acetate = 5:1).

**Yield** 38.6 mg (49%).

**NMR Spectroscopy:**

$^1\text{H NMR}$  (400 MHz, Chloroform-*d*)  $\delta$  7.61 (d,  $J$  = 15.6 Hz, 1H), 7.53 – 7.44 (m, 2H), 7.33 (d,  $J$  = 5.2 Hz, 3H), 6.42 (d,  $J$  = 15.6 Hz, 1H), 5.86 (br, 1H), 5.43 – 5.28 (m, 2H), 3.37 (q,  $J$  = 6.7 Hz, 2H), 2.03 – 1.95 (m, 4H), 1.57 (q,  $J$  = 7.1 Hz, 2H), 1.36 – 1.25 (m, 22H), 0.88 (t,  $J$  = 6.7 Hz, 3H).

$^{13}\text{C NMR}$  (101 MHz, Chloroform-*d*)  $\delta$  166.0, 140.8, 135.1, 130.1, 129.9, 129.7, 128.9, 127.9, 121.1, 40.0, 32.7, 32.0, 29.89, 29.86, 29.82, 29.77, 29.64, 29.57, 29.43, 29.35, 27.34, 27.32, 27.1, 22.8, 14.2.

**HRMS** (ESI)  $m/z$ :  $[\text{M} + \text{H}]^+$  calcd for  $\text{C}_{27}\text{H}_{44}\text{NO}^+$ : 398.3417, found: 398.3411.

***N*-(3-Methoxypropyl)cinnamamide (2p)**

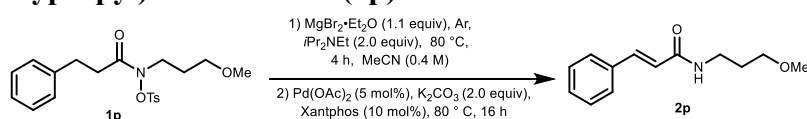

Under argon atmosphere, *N*-(3-methoxypropyl)-3-phenyl-*N*-(tosyloxy)propenamide **1p** (78.2 mg, 0.20 mmol, 1.0 equiv), magnesium bromide ethyl etherate (56.8 mg, 0.22 mmol, 1.1 equiv), dry acetonitrile (0.5 mL) and *N*-ethyldiisopropylamine (69.0  $\mu\text{L}$ , 0.40 mmol, 2.0 equiv) were added successively to a 10 mL Schlenk tube with a magnetic bar. The sealed tube was then stirred at 80 °C for 4 h or more until the starting materials were consumed completely.

Then palladium (II) acetate (2.3 mg, 0.01 mmol, 0.05 equiv), Xantphos (11.6 mg, 0.02 mmol, 0.10 equiv) and  $\text{K}_2\text{CO}_3$  (55.5 mg, 0.40 mmol, 2.0 equiv) were added to the mixture under argon atmosphere. The sealed tube was then vigorously stirred at 80 °C for 16 h. The mixture was filtered through a pad of silica gel and the filtrate was concentrated under reduced pressure. The residual was purified by column chromatography on silica gel (eluent: petroleum ether/ ethyl acetate =2:1) to afford *N*-(3-methoxypropyl)cinnamamide **2p** as a colourless oil.

$R_f$  = 0.1 (Eluent: petroleum ether/ethyl acetate = 2:1).

**Yield** 28.2 mg (64%).

**NMR Spectroscopy:**

$^1\text{H NMR}$  (400 MHz, Chloroform-*d*)  $\delta$  7.62 (d,  $J$  = 15.6 Hz, 1H), 7.51 (dd,  $J$  = 7.3, 2.4 Hz, 2H), 7.40 – 7.34 (m, 3H), 6.41 (d,  $J$  = 15.7 Hz, 2H), 3.54 – 3.51 (m, 4H), 3.38 (s, 3H), 1.87 (q,  $J$  = 6.1 Hz, 2H).

$^{13}\text{C NMR}$  (101 MHz, Chloroform-*d*)  $\delta$  166.0, 140.7, 135.1, 129.6, 128.9, 127.9, 121.2, 71.9, 58.9, 38.5, 29.2.

**HRMS** (ESI)  $m/z$ :  $[\text{M} + \text{H}]^+$  calcd for  $\text{C}_{13}\text{H}_{18}\text{NO}_2^+$ : 220.1332, found: 230.1329.

**(*E*)-6-(Benzylamino)-6-oxohex-4-en-1-yl dimethylpentanoate (2q)**

**5-(2,5-dimethylphenoxy)-2,2-dimethylpentanoate (2q)**

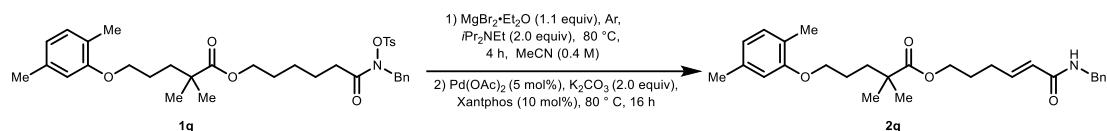

Under argon atmosphere, 6-(benzyl(tosyloxy)amino)-6-oxohexyl 5-(2,5-dimethylphenoxy)-2,2-dimethylpentanoate **1q** (124.8 mg, 0.20 mmol, 1.0 equiv), magnesium bromide ethyl etherate (56.8 mg, 0.22 mmol, 1.1 equiv), dry acetonitrile (0.5 mL) and *N*-ethyldiisopropylamine (69.0  $\mu$ L, 0.40 mmol, 2.0 equiv) were added successively to a 10 mL Schlenk tube with a magnetic bar. The sealed tube was then stirred at 80 °C for 4 h or more until the starting materials were consumed completely. Then palladium (II) acetate (2.3 mg, 0.01 mmol, 0.05 equiv), Xantphos (11.6 mg, 0.02 mmol, 0.10 equiv) and  $K_2CO_3$  (55.5 mg, 0.40 mmol, 2.0 equiv) were added to the mixture under argon atmosphere. The sealed tube was then vigorously stirred at 80 °C for 16 h. The mixture was filtered through a pad of silica gel and the filtrate was concentrated under reduced pressure. The residual was purified by column chromatography on silica gel (eluent: petroleum ether/ ethyl acetate =3:1) to afford (*E*)-6-(benzylamino)-6-oxohex-4-en-1-yl 5-(2,5-dimethylphenoxy)-2,2-dimethylpentanoate **2q** as a yellow oil.

$R_f$  = 0.2 (Eluent: petroleum ether/ ethyl acetate =3:1).

**Yield** 37.3mg (41%).

**NMR Spectroscopy:**

$^1H$  NMR (400 MHz, Chloroform-*d*)  $\delta$  7.38 – 7.28 (m, 5H), 7.00 (d,  $J$  = 7.4 Hz, 1H), 6.88 (dt,  $J$  = 14.6, 6.9 Hz, 1H), 6.69 – 6.61 (m, 2H), 5.86 – 5.75 (m, 2H), 4.48 (d,  $J$  = 5.8 Hz, 2H), 4.10 (t,  $J$  = 6.4 Hz, 2H), 3.93 (d,  $J$  = 5.6 Hz, 2H), 2.30 (d,  $J$  = 6.7 Hz, 5H), 2.19 (s, 3H), 1.85 – 1.74 (m, 6H), 1.23 (d,  $J$  = 6.2 Hz, 6H).

$^{13}C$  NMR (101 MHz, Chloroform-*d*)  $\delta$  177.8, 165.6, 157.0, 143.6, 138.4, 136.6, 130.4, 128.7, 127.9, 127.5, 124.2, 123.6, 120.9, 112.1, 68.1, 63.6, 43.7, 42.2, 37.2, 28.6, 27.4, 25.32, 25.27, 21.5, 15.9.

**HRMS** (ESI)  $m/z$ :  $[M + Na]^+$  calcd for  $C_{28}H_{37}NO_4Na^+$ : 474.2615, found: 474.2611.

**(*E*)-6-(Methylamino)-6-oxohex-4-en-1-yl 2-(3-cyano-4-isobutoxyphenyl)-4-methylthiazole-5-carboxylate (2r)**

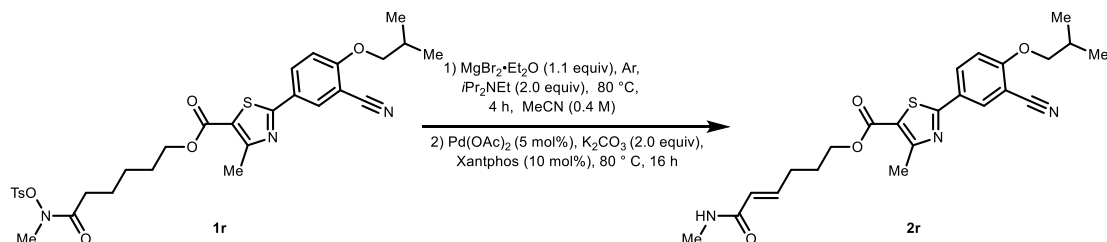

Under argon atmosphere, 6-(methyl(tosyloxy)amino)-6-oxohexyl 2-(3-cyano-4-isobutoxyphenyl)-4-methylthiazole-5-carboxylate **1r** (162.7 mg, 0.20 mmol, 1.0 equiv), magnesium bromide ethyl etherate (56.8 mg, 0.22 mmol, 1.1 equiv), dry acetonitrile (0.5 mL) and *N*-ethyldiisopropylamine (69.0  $\mu$ L, 0.40 mmol, 2.0 equiv) were added

successively to a 10 mL Schlenk tube with a magnetic bar. The sealed tube was then stirred at 80 °C for 4 h or more until the starting materials were consumed completely. Then palladium (II) acetate (2.3 mg, 0.01 mmol, 0.05 equiv), Xantphos (11.6 mg, 0.02 mmol, 0.10 equiv) and K<sub>2</sub>CO<sub>3</sub> (55.5 mg, 0.40 mmol, 2.0 equiv) were added to the mixture under argon atmosphere. The sealed tube was then vigorously stirred at 80 °C for 16 h. The mixture was filtered through a pad of silica gel and the filtrate was concentrated under reduced pressure. The residual was purified by column chromatography on silica gel (eluent: petroleum ether/ ethyl acetate =1:2) to afford (*E*)-6-(methylamino)-6-oxohex-4-en-1-yl 2-(3-cyano-4-isobutoxyphenyl)-4-methylthiazole-5-carboxylate **2r** as a yellow solid.

**R<sub>f</sub>** = 0.2 (Eluent: petroleum ether/ ethyl acetate =1:2).

**Yield** 52.4 mg (59%).

**NMR Spectroscopy:**

**<sup>1</sup>H NMR** (400 MHz, Chloroform-*d*) δ 8.17 (s, 1H), 8.09 (d, *J* = 8.1 Hz, 1H), 7.02 (d, *J* = 8.9 Hz, 1H), 6.86 (dt, *J* = 14.5, 6.9 Hz, 1H), 5.89 – 5.77 (m, 2H), 4.31 (t, *J* = 6.5 Hz, 2H), 3.90 (d, *J* = 6.4 Hz, 2H), 2.87 (d, *J* = 4.8 Hz, 3H), 2.75 (s, 3H), 2.34 (q, *J* = 7.3 Hz, 2H), 2.27 – 2.16 (m, 1H), 1.95 – 1.88 m, 2H), 1.09 (d, *J* = 6.7 Hz, 6H).

**<sup>13</sup>C NMR** (101 MHz, Chloroform-*d*) δ 167.4, 166.5, 162.6, 162.0, 161.4, 142.7, 132.7, 132.2, 126.0, 124.5, 121.7, 115.5, 112.7, 103.0, 75.8, 64.5, 28.6, 28.2, 27.5, 26.4, 19.1, 17.6.

**HRMS** (ESI) *m/z*: [M + H]<sup>+</sup> calcd for C<sub>23</sub>H<sub>28</sub>N<sub>3</sub>O<sub>4</sub>S<sup>+</sup>: 442.1795, found: 442.1791.

**(*E*)-*N*-Methyl-6-(((*R*)-2,5,7,8-tetramethyl-2-((4*R*,8*R*)-4,8,12-trimethyltridecyl)chroman-6-yl)oxy)hex-2-enamide (**2s**)**

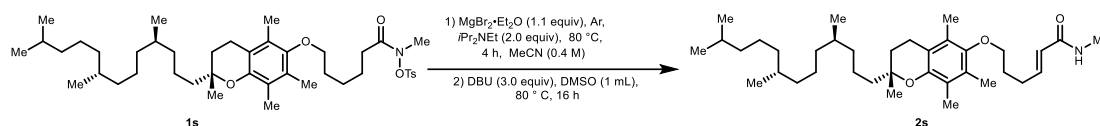

Under argon atmosphere, *N*-methyl-6-(((*R*)-2,5,7,8-tetramethyl-2-((4*R*,8*R*)-4,8,12-trimethyltridecyl)chroman-6-yl)oxy)-*N*-(tosyloxy)hexanamide **1s** (145.6 mg, 0.20 mmol, 1.0 equiv), magnesium bromide ethyl etherate (56.8 mg, 0.22 mmol, 1.1 equiv), dry acetonitrile (0.5 mL) and *N*-ethyldiisopropylamine (69.0 μL, 0.40 mmol, 2.0 equiv) were added successively to a 10 mL Schlenk tube with a magnetic bar. The sealed tube was then stirred at 80 °C for 4 h or more until the starting materials were consumed completely.

Then DBU (90.0 μL, 0.60 mmol, 3.0 equiv) and dry DMSO (1.0 mL) were added to the mixture under argon atmosphere. The sealed tube was then vigorously stirred at 80 °C for 16 h before being washed with H<sub>2</sub>O (5.0 mL). The aqueous phase was extracted with ethyl acetate (3 × 5.0 mL). After that, the organic phase was dried over anhydrous Na<sub>2</sub>SO<sub>4</sub>, filtered, and concentrated under reduced pressure. The residual was purified by column chromatography on silica gel (eluent: petroleum ether/ethyl acetate = 1:1)

to afford (*E*)-*N*-methyl-6-(((*R*)-2,5,7,8-tetramethyl-2-(((4*R*,8*R*)-4,8,12-trimethyltridecyl)chroman-6-yl)oxy)hex-2-enamide **2s** as a white solid.

**R<sub>f</sub>** = 0.5 (Eluent: petroleum ether/ethyl acetate = 1:1).

**Yield** 53.1 mg (48%).

**NMR Spectroscopy:**

**<sup>1</sup>H NMR** (400 MHz, Chloroform-*d*) δ 6.88 (dt, *J* = 14.5, 6.9 Hz, 1H), 5.83 (d, *J* = 15.3 Hz, 1H), 5.75 (br, 1H), 3.65 (d, *J* = 6.6 Hz, 2H), 2.86 (d, *J* = 4.8 Hz, 3H), 2.56 (t, *J* = 6.8 Hz, 2H), 2.42 (q, *J* = 7.4 Hz, 2H), 2.15 (s, 3H), 2.10 (s, 3H), 2.07 (s, 3H), 1.92 (t, *J* = 7.2 Hz, 2H), 1.84 – 1.70 (m, 3H), 1.56 – 1.43 (m, 3H), 1.41 – 1.36 (m, 3H), 1.29 – 1.22 (m, 8H), 1.17 – 1.12 (m, 3H), 1.11 – 1.04 (m, 4H), 0.87 (s, 4H), 0.86 – 0.83 (m, 10H).

**<sup>13</sup>C NMR** (101 MHz, Chloroform-*d*) δ 166.8, 148.2, 147.9, 143.7, 127.8, 125.8, 124.1, 122.9, 117.6, 74.9, 72.1, 40.2, 39.5, 37.7, 37.6, 37.5, 37.4, 32.9, 32.8, 31.4, 29.1, 28.9, 28.1, 26.4, 24.9, 24.5, 24.0, 22.8, 22.7, 21.1, 20.8, 19.9, 19.8, 19.7, 12.9, 12.0, 11.9.

**HRMS** (ESI) *m/z*: [M + Na]<sup>+</sup> calcd for C<sub>36</sub>H<sub>61</sub>NO<sub>3</sub>Na<sup>+</sup>: 578.4543, found: 578.4539.

**(*E*)-6-(Methylamino)-6-oxohex-4-en-1-yl 2-(11-oxo-6,11-dihydrodibenzo[*b,e*]oxepin-2-yl)acetate (**2t**)**

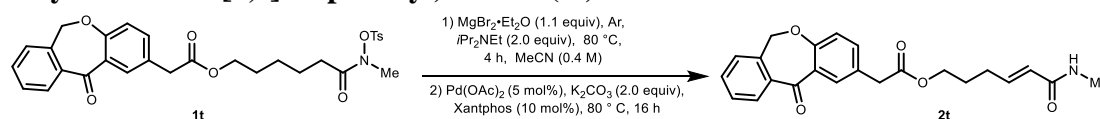

Under argon atmosphere, 6-(methyl(tosyloxy)amino)-6-oxohexyl 2-(11-oxo-6,11-dihydrodibenzo[*b,e*]oxepin-2-yl)acetate **1t** (113.1 mg, 0.20 mmol, 1.0 equiv), magnesium bromide ethyl etherate (56.8 mg, 0.22 mmol, 1.1 equiv), dry acetonitrile (0.5 mL) and *N*-ethyldiisopropylamine (69.0 μL, 0.40 mmol, 2.0 equiv) were added successively to a 10 mL Schlenk tube with a magnetic bar. The sealed tube was then stirred at 80 °C for 4 h or more until the starting materials were consumed completely. Then palladium (II) acetate (2.3 mg, 0.01 mmol, 0.05 equiv), Xantphos (11.6 mg, 0.02 mmol, 0.10 equiv) and K<sub>2</sub>CO<sub>3</sub> (55.5 mg, 0.40 mmol, 2.0 equiv) were added to the mixture under argon atmosphere. The sealed tube was then vigorously stirred at 80 °C for 16 h. The mixture was filtered through a pad of silica gel and the filtrate was concentrated under reduced pressure. The residual was purified by column chromatography on silica gel (eluent: petroleum ether/ethyl acetate =3:2) to afford (*E*)-6-(methylamino)-6-oxohex-4-en-1-yl 2-(11-oxo-6,11-dihydrodibenzo[*b,e*]oxepin-2-yl)acetate **2t** as a yellow oil.

**R<sub>f</sub>** = 0.2 (Eluent: petroleum ether/ethyl acetate =3:2).

**Yield** 39.0 mg (49%).

**NMR Spectroscopy:**

**<sup>1</sup>H NMR** (400 MHz, Chloroform-*d*) δ 8.12 (d, *J* = 2.4 Hz, 1H), 7.88 (dd, *J* = 7.7, 1.4 Hz, 1H), 7.61 – 7.55 (m, 1H), 7.51 – 7.45 (m, 1H), 7.42 (dd, *J* = 8.4, 2.4 Hz, 1H), 7.37 (dd, *J* = 7.5, 1.3 Hz, 1H), 7.03 (d, *J* = 8.4 Hz, 1H), 6.77 (dt, *J* = 15.3, 7.0

Hz, 1H), 5.86 (br, 1H), 5.79 (dt,  $J = 15.3, 1.5$  Hz, 1H), 5.19 (s, 2H), 4.11 (t,  $J = 6.4$  Hz, 2H), 3.64 (s, 2H), 2.84 (d,  $J = 4.9$  Hz, 3H), 2.22 – 2.16 (m, 2H), 1.81 – 1.75 (m, 2H).

$^{13}\text{C}$  NMR (101 MHz, Chloroform-*d*)  $\delta$  191.1, 171.4, 166.6, 160.6, 142.6, 140.4, 136.6, 135.7, 133.0, 132.4, 129.5, 129.4, 128.1, 128.0, 125.3, 124.6, 121.2, 73.8, 64.0, 40.4, 28.3, 27.2, 26.4.

HRMS (ESI)  $m/z$ :  $[\text{M} + \text{H}]^+$  calcd for  $\text{C}_{23}\text{H}_{24}\text{NO}_5^+$ : 394.1649, found: 394.1645.

### Methyl (*E*)-6-(benzylamino)-6-oxohex-4-enoate (**2w**)

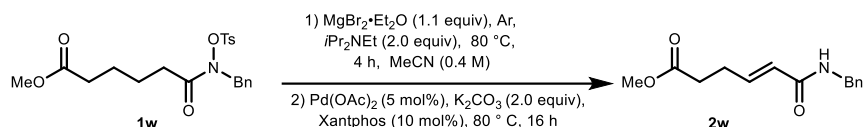

Under argon atmosphere, methyl 6-(benzyl(tosyloxy)amino)-6-oxohexanoate **1w** (83.9 mg, 0.20 mmol, 1.0 equiv), magnesium bromide ethyl etherate (56.8 mg, 0.22 mmol, 1.1 equiv), dry acetonitrile (0.5 mL) and *N*-ethyldiisopropylamine (69.0  $\mu\text{L}$ , 0.40 mmol, 2.0 equiv) were added successively to a 10 mL Schlenk tube with a magnetic bar. The sealed tube was then stirred at 80 °C for 4 h or more until the starting materials were consumed completely.

Then palladium (II) acetate (2.3 mg, 0.01 mmol, 0.05 equiv), Xantphos (11.6 mg, 0.02 mmol, 0.10 equiv) and  $\text{K}_2\text{CO}_3$  (55.5 mg, 0.40 mmol, 2.0 equiv) were added to the mixture under argon atmosphere. The sealed tube was then vigorously stirred at 80 °C for 16 h. The mixture was filtered through a pad of silica gel and the filtrate was concentrated under reduced pressure. The residual was purified by column chromatography on silica gel (eluent: petroleum ether/ ethyl acetate = 2:1) to afford methyl (*E*)-6-(benzylamino)-6-oxohex-4-enoate **2w** as a yellow solid.

$R_f = 0.2$  (Eluent: petroleum ether/ethyl acetate = 2:1).

Yield 30.0 mg (61%).

#### NMR Spectroscopy:

$^1\text{H}$  NMR (400 MHz, Chloroform-*d*)  $\delta$  7.36 – 7.24 (m, 5H), 6.84 (dt,  $J = 15.3, 6.2$  Hz, 1H), 5.89 – 5.74 (m, 2H), 4.50 (d,  $J = 5.7$  Hz, 2H), 3.67 (s, 3H), 2.56 – 2.43 (m, 4H).

$^{13}\text{C}$  NMR (151 MHz, Chloroform-*d*)  $\delta$  173.0, 165.6, 142.7, 138.3, 128.9, 128.0, 127.7, 124.5, 51.9, 43.8, 32.6, 27.2.

HRMS (ESI)  $m/z$ :  $[\text{M} + \text{H}]^+$  calcd for  $\text{C}_{14}\text{H}_{18}\text{NO}_3^+$ : 248.1281, found: 248.1279.

### (*E*)-6-(Methylamino)-6-oxohex-4-en-1-yl 3-(4,5-diphenyloxazol-2-yl)propanoate (**2x**)

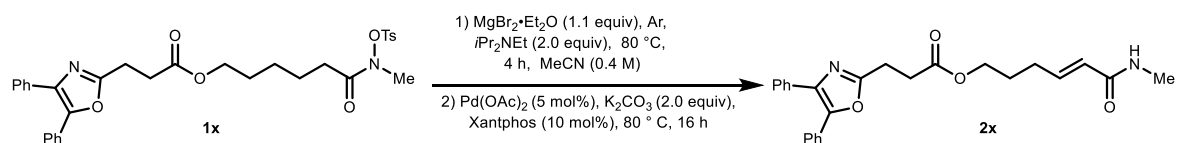



Under argon atmosphere, 6-(methyl(tosyloxy)amino)-6-oxohexyl 3-(4,5-diphenyloxazol-2-yl)propanoate **1x** (118.1 mg, 0.20 mmol, 1.0 equiv), magnesium bromide ethyl etherate (56.8 mg, 0.22 mmol, 1.1 equiv), dry acetonitrile (0.5 mL) and *N*-ethyldiisopropylamine (69.0  $\mu$ L, 0.40 mmol, 2.0 equiv) were added successively to a 10 mL Schlenk tube with a magnetic bar. The sealed tube was then stirred at 80 °C for 4 h or more until the starting materials were consumed completely.

Then palladium (II) acetate (2.3 mg, 0.01 mmol, 0.05 equiv), Xantphos (11.6 mg, 0.02 mmol, 0.10 equiv) and K<sub>2</sub>CO<sub>3</sub> (55.5 mg, 0.40 mmol, 2.0 equiv) were added to the mixture under argon atmosphere. The sealed tube was then vigorously stirred at 80 °C for 16 h. The mixture was filtered through a pad of silica gel and the filtrate was concentrated under reduced pressure. The residual was purified by column chromatography on silica gel (eluent: petroleum ether/ ethyl acetate =1:1) to afford (*E*)-6-(methylamino)-6-oxohex-4-en-1-yl 3-(4,5-diphenyloxazol-2-yl)propanoate **2x** as a colourless oil.

**R<sub>f</sub>** = 0.1 (Eluent: petroleum ether/ ethyl acetate =1:1).

**Yield** 38.2 mg (46%).

**NMR Spectroscopy:**

**<sup>1</sup>H NMR** (600 MHz, Chloroform-*d*)  $\delta$  7.58 – 7.54 (m, 2H), 7.52 – 7.48 (m, 2H), 7.32 – 7.23 (m, 6H), 6.68 (dt, *J* = 15.2, 7.0 Hz, 1H), 5.61 (d, *J* = 15.3 Hz, 1H), 5.36 (br, 1H), 4.06 (t, *J* = 6.4 Hz, 2H), 3.11 (t, *J* = 7.3 Hz, 2H), 2.85 (t, *J* = 7.3 Hz, 2H), 2.74 (d, *J* = 4.9 Hz, 3H), 2.16 – 2.12 (m, 2H), 1.73 – 1.70 (m, 2H).

**<sup>13</sup>C NMR** (101 MHz, Chloroform-*d*)  $\delta$  172.0, 166.5, 161.9, 145.6, 142.8, 135.1, 132.4, 129.0, 128.8, 128.72, 128.65, 128.2, 128.0, 126.6, 124.4, 64.0, 31.2, 28.4, 27.3, 26.3, 23.6.

**HRMS** (ESI) *m/z*: [M + Na]<sup>+</sup> calcd for C<sub>25</sub>H<sub>26</sub>N<sub>2</sub>O<sub>4</sub>Na<sup>+</sup>: 441.1785, found: 441.1769.

**(*E*)-*N*-Benzyl-6-(4-butyrylphenoxy)hex-2-enamide (2y)**

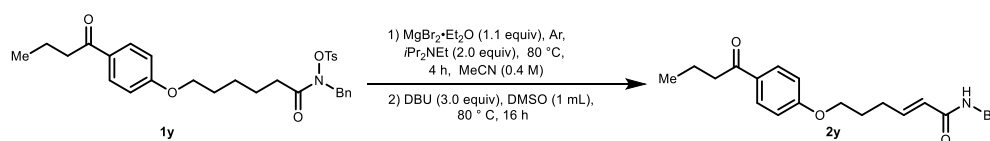

Under argon atmosphere, *N*-benzyl-6-(4-butyrylphenoxy)-*N*-(tosyloxy)hexanamide **1y** (107.5 mg, 0.20 mmol, 1.0 equiv), magnesium bromide ethyl etherate (56.8 mg, 0.22 mmol, 1.1 equiv), dry acetonitrile (0.5 mL) and *N*-ethyldiisopropylamine (69.0  $\mu$ L, 0.40 mmol, 2.0 equiv) were added successively to a 10 mL Schlenk tube with a magnetic bar. The sealed tube was then stirred at 80 °C for 4 h or more until the starting materials were consumed completely.

Then DBU (90.0  $\mu$ L, 0.60 mmol, 3.0 equiv) and dry DMSO (1.0 mL) were added to the mixture under argon atmosphere. The sealed tube was then vigorously stirred at 80 °C for 16 h before being washed with H<sub>2</sub>O (5.0 mL). The aqueous phase was extracted with ethyl acetate (3  $\times$  5.0 mL). After that, the organic phase was dried over anhydrous Na<sub>2</sub>SO<sub>4</sub>, filtered, and concentrated under reduced pressure. The residual was purified

by column chromatography on silica gel (eluent: petroleum ether/ethyl acetate = 2:1) to afford (*E*)-*N*-benzyl-6-(4-butyrylphenoxy)hex-2-enamide **2y** as a white solid.

$R_f$  = 0.3 (Eluent: petroleum ether/ethyl acetate = 2:1).

Yield 29.9 mg (41%).

**NMR Spectroscopy:**

$^1\text{H NMR}$  (400 MHz, Chloroform-*d*)  $\delta$  7.83 (d,  $J$  = 8.6 Hz, 2H), 7.26 – 7.15 (m, 5H), 6.85 – 6.79 (m, 2H), 5.85 – 5.61 (m, 2H), 4.47 – 4.32 (m, 2H), 3.94 (t,  $J$  = 6.1 Hz, 2H), 2.79 (t,  $J$  = 7.3 Hz, 2H), 2.31 (q,  $J$  = 7.3 Hz, 2H), 1.88 (t,  $J$  = 6.9 Hz, 2H), 1.71 – 1.64 (m, 3H), 0.91 (t,  $J$  = 7.4 Hz, 3H).

$^{13}\text{C NMR}$  (101 MHz, Chloroform-*d*)  $\delta$  199.3, 165.7, 162.7, 143.8, 138.3, 130.4, 130.3, 128.8, 128.0, 127.7, 124.4, 114.2, 67.1, 43.8, 40.3, 28.6, 27.9, 18.1, 14.1.

HRMS (ESI)  $m/z$ :  $[M + H]^+$  calcd for  $\text{C}_{23}\text{H}_{28}\text{NO}_3^+$ : 366.2064, found: 366.2062.

**(*E*)-6-(Benzylamino)-6-oxohex-4-en-1-yl 4-phenylbutanoate (2z)**

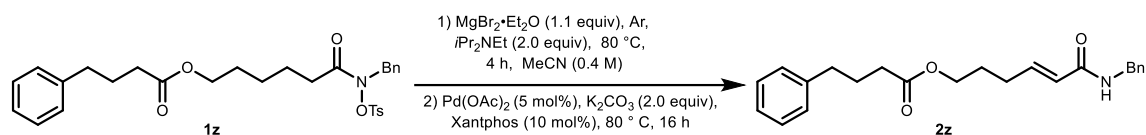

Under argon atmosphere, 6-(benzyl(tosyloxy)amino)-6-oxohexyl 4-phenylbutanoate **1z** (107.5 mg, 0.20 mmol, 1.0 equiv), magnesium bromide ethyl etherate (56.8 mg, 0.22 mmol, 1.1 equiv), dry acetonitrile (0.5 mL) and *N*-ethyldiisopropylamine (69.0  $\mu\text{L}$ , 0.40 mmol, 2.0 equiv) were added successively to a 10 mL Schlenk tube with a magnetic bar. The sealed tube was then stirred at 80 °C for 4 h or more until the starting materials were consumed completely.

Then palladium (II) acetate (2.3 mg, 0.01 mmol, 0.05 equiv), Xantphos (11.6 mg, 0.02 mmol, 0.10 equiv) and  $\text{K}_2\text{CO}_3$  (55.5 mg, 0.40 mmol, 2.0 equiv) were added to the mixture under argon atmosphere. The sealed tube was then vigorously stirred at 80 °C for 16 h. The mixture was filtered through a pad of silica gel and the filtrate was concentrated under reduced pressure. The residual was purified by column chromatography on silica gel (eluent: petroleum ether/ ethyl acetate =2:1) to afford (*E*)-6-(benzylamino)-6-oxohex-4-en-1-yl 4-phenylbutanoate **2z** as a yellow oil.

$R_f$  = 0.4 (Eluent: petroleum ether/ ethyl acetate =2:1).

Yield 33.6 mg (46%).

**NMR Spectroscopy:**

$^1\text{H NMR}$  (400 MHz, Chloroform-*d*)  $\delta$  7.36 – 7.23 (m, 7H), 7.22 – 7.13 (m, 3H), 6.97 – 6.78 (m, 1H), 5.93 (br, 1H), 5.80 (d,  $J$  = 15.2 Hz, 1H), 4.48 (d,  $J$  = 2.4 Hz, 2H), 4.06 (t,  $J$  = 6.5, 2H), 2.67 – 2.61 (m, 2H), 2.34 – 2.29 (m, 2H), 2.23 (q,  $J$  = 7.8 Hz, 2H), 1.98 – 1.90 (m, 2H), 1.82 – 1.72 (m, 2H).

$^{13}\text{C NMR}$  (101 MHz, Chloroform-*d*)  $\delta$  173.6, 165.7, 143.6, 141.4, 138.3, 128.8, 128.6, 128.5, 127.9, 127.6, 126.1, 124.2, 63.5, 43.7, 35.2, 33.7, 28.6, 27.4, 26.6.

HRMS (ESI)  $m/z$ :  $[M + H]^+$  calcd for  $\text{C}_{23}\text{H}_{28}\text{NO}_3^+$ : 366.2064, found: 366.2061.

## Failed substrates

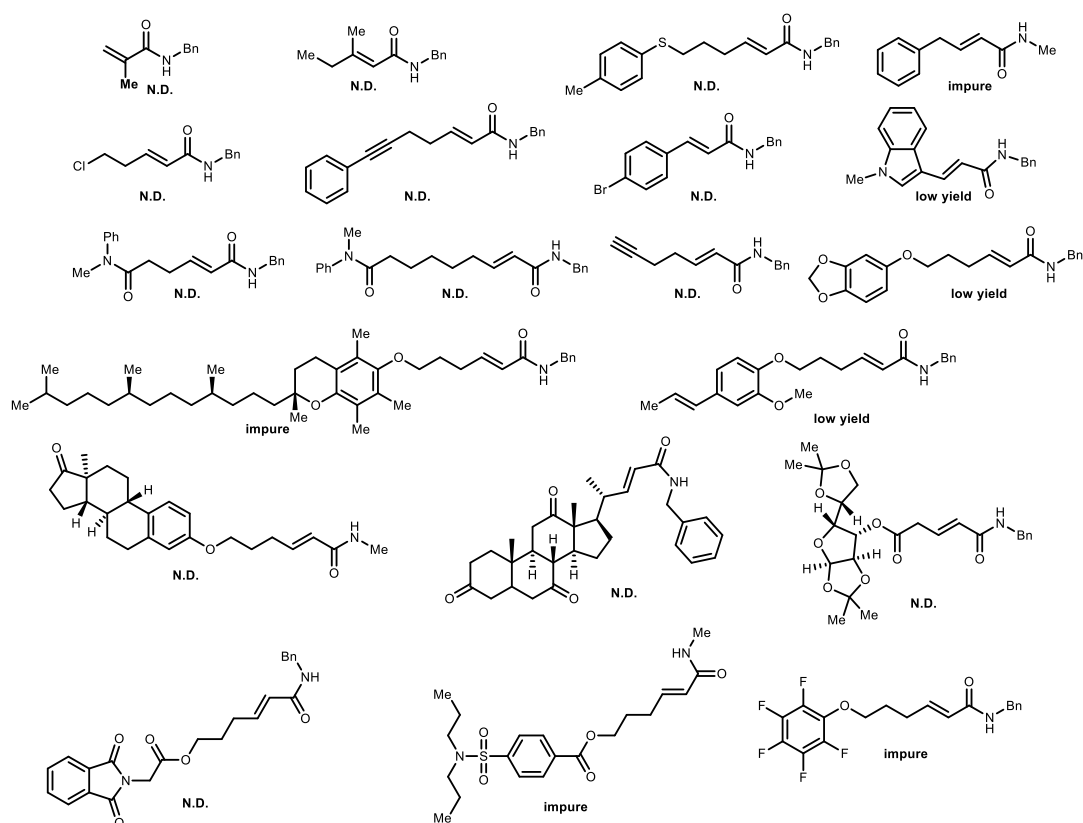

## 5. Scaled-up reaction

### (*E*)-*N*-Benzylpent-2-enamide (**2a**)

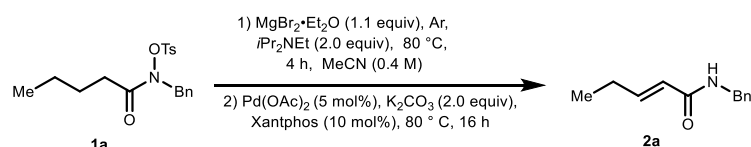

Under argon atmosphere, *N*-benzyl-*N*-(tosyloxy)pentanamide **1a** (2.17 g, 6.0 mmol, 1.0 equiv), magnesium bromide ethyl etherate (1.72 g, 6.6 mmol, 1.1 equiv), dry acetonitrile (15.0 mL) and *N*-ethyldiisopropylamine (2.09 mL, 12.0 mmol, 2.0 equiv) were added successively to a 100 mL Schlenk tube with a magnetic bar. The sealed tube was then stirred at 80 °C for 16 h.

Then palladium (II) acetate (69.0 mg, 0.30 mmol, 0.05 equiv), Xantphos (347.2 mg, 0.60 mmol, 0.10 equiv) and K<sub>2</sub>CO<sub>3</sub> (1.66 g, 12.0 mmol, 2.0 equiv) were added to the mixture under argon atmosphere. The sealed tube was then vigorously stirred at 80 °C for 16 h. The mixture was filtered through a pad of silica gel and the filtrate was concentrated under reduced pressure. The residual was purified by column chromatography on silica gel (eluent: petroleum ether/ ethyl acetate =3:1) to afford (*E*)-*N*-benzylpent-2-enamide **2a** as a white solid in 68% yield (0.77 g).

## 6. Derivatization to other compounds

### (*E*)-*N*-Benzyl-*N*-methylpent-2-enamide (**3**)

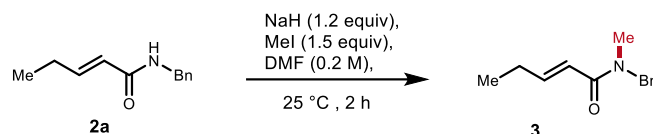

Under argon atmosphere, (*E*)-*N*-benzylpent-2-enamide **2a** (37.9 mg, 0.20 mmol, 1.0 equiv), dry *N,N*-dimethylformamide (1.0 mL) and NaH (60%, dispersion in Paraffin Liquid) (9.6 mg, 0.24 mmol, 1.2 equiv) were added successively to a 10 mL Schlenk tube with a magnetic bar at 0 °C. The sealed tube was then stirred at 25 °C for 0.5 h. Then the MeI (19.6  $\mu$ L, 0.30 mmol, 1.5 equiv) was added to the mixture under argon atmosphere. The sealed tube was then vigorously stirred at 25 °C for 2 h. Then the mixture was concentrated under reduced pressure. The residual was purified by column chromatography on silica gel (eluent: petroleum ether/ethyl acetate = 5:1) to afford (*E*)-*N*-benzyl-*N*-methylpent-2-enamide **3** as a colorless oil.

R<sub>f</sub> = 0.9 (Eluent: petroleum ether/ ethyl acetate =5:1).

Yield 30.5 mg (75%).

#### NMR Spectroscopy:

<sup>1</sup>H NMR (400 MHz, Chloroform-*d*)  $\delta$  7.42 – 7.27 (m, 3H), 7.27 – 7.15 (m, 2H), 7.08 – 6.95 (m, 1H), 6.30 – 6.22 (m, 1H), 4.65 (s, 1H), 4.59 (s, 1H), 2.98 (s, 3H), 2.29 – 2.18 (m, 2H), 1.11 – 1.01 (m, 3H).

<sup>13</sup>C NMR (101 MHz, Chloroform-*d*)  $\delta$  167.6, 167.1, 148.6, 148.4, 137.5, 137.0, 129.0, 128.7, 128.1, 127.7, 127.4, 126.6, 119.3, 53.5, 51.2, 35.0, 34.2, 25.7, 25.7, 12.7.

HRMS (ESI) *m/z*: [M + Na]<sup>+</sup> calcd for C<sub>13</sub>H<sub>17</sub>NONa<sup>+</sup>: 226.1202, found: 226.1200.

### *N*-Benzyl-3-(4,4,5,5-tetramethyl-1,3,2-dioxaborolan-2-yl)pentanamide (**4**)

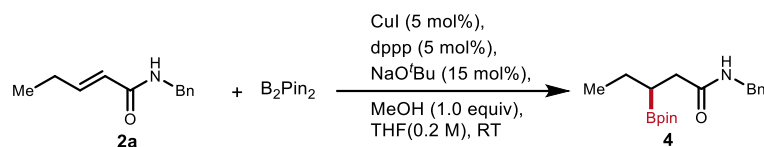

To a flame-dried 10 mL Schlenk tube was added CuCl (1 mg, 0.01 mmol, 0.05 equiv), NaO<sup>t</sup>Bu (2.8 mg, 0.03 mmol, 0.15 equiv), dppp ligand (4.1 mg, 0.01 mmol, 0.05 equiv), dry THF (0.40 mL) was added under nitrogen<sup>3</sup>. The reaction mixture was stirred at room temperature for 0.5 h, after which time bis(pinacolato)diboron (141.0 mg, 0.22mmol, 1.1 equiv.) in THF (0.30 mL) was added. The reaction mixture was stirred for 10 min and then (*E*)-*N*-benzylpent-2-enamide **2a** (37.9 mg, 0.2 mmol, 1.0 equiv) in THF (0.30 mL) were added, followed by MeOH (16.0  $\mu$ L, 0.4 mmol, 2.0 equiv). The resulting mixture was stirred until complete consumption of starting material as indicated by TLC. The resulting mixture was diluted with acetone (10 mL), filtered (Celite), and concentrated under a reduced pressure. The residual was purified by column chromatography on silica gel (eluent: petroleum ether/ethyl acetate = 3:1) to

afford *N*-benzyl-3-(4,4,5,5-tetramethyl-1,3,2-dioxaborolan-2-yl)pentanamide **4** as a white solid.

$R_f = 0.7$  (Eluent: petroleum ether/ ethyl acetate =3:1).

**Yield** 58.6 mg (92%).

**NMR Spectroscopy:**

$^1\text{H NMR}$  (400 MHz, Chloroform-*d*)  $\delta$  7.35 – 7.23 (m, 5H), 6.04 (d,  $J = 7.9$  Hz, 1H), 4.41 (dd,  $J = 5.7, 3.6$  Hz, 2H), 2.42 – 2.25 (m, 2H), 1.53 – 1.39 (m, 2H), 1.37 – 1.28 (m, 1H), 1.20 (d,  $J = 4.8$  Hz, 12H), 0.93 (t,  $J = 7.4$  Hz, 3H).

$^{13}\text{C NMR}$  (101 MHz, Chloroform-*d*)  $\delta$  173.3, 138.6, 128.7, 128.0, 127.5, 83.3, 43.7, 37.9, 24.9, 24.8, 24.0, 13.4.

**HRMS** (ESI)  $m/z$ :  $[M + H]^+$  calcd for  $\text{C}_{18}\text{H}_{29}\text{BNO}_3^+$ : 318.2235, found: 318.2233.

***tert*-butyl (*E*)-Benzyl(pent-2-enoyl)carbamate (**5**)**

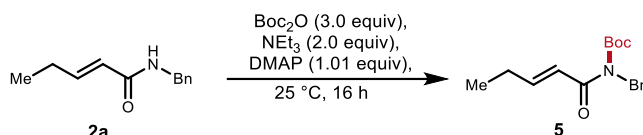

To a flame-dried 25 mL flask was added (*E*)-*N*-benzylpent-2-enamide **2a** (94.6 mg, 0.50 mmol, 1.0 equiv), di-*tert*-butyl decarbonate (345.0  $\mu\text{L}$ , 1.50 mmol, 3.0 equiv), triethylamine (138.7  $\mu\text{L}$ , 1.00 mmol, 2.0 equiv), 4-dimethylaminopyridine (61.7 mg, 0.51 mmol, 1.01 equiv) and DCM (1.0 mL) was added. The resulting mixture was stirred 25 °C until complete consumption of starting material as indicated by TLC. Then the mixture was concentrated under reduced pressure. The residual was purified by column chromatography on silica gel (eluent: petroleum ether/ethyl acetate = 5:1) to afford *tert*-butyl (*E*)-benzyl(pent-2-enoyl)carbamate **5** as a colorless oil.

$R_f = 0.9$  (Eluent: petroleum ether/ ethyl acetate =5:1).

**Yield** 116.5 mg (81%).

**NMR Spectroscopy:**

$^1\text{H NMR}$  (400 MHz, Chloroform-*d*)  $\delta$  7.36 – 7.21 (m, 5H), 7.05 (dt,  $J = 15.2, 6.4$  Hz, 1H), 6.82 (d,  $J = 15.1$  Hz, 1H), 4.90 (s, 2H), 2.33 – 2.22 (m, 2H), 1.40 (s, 9H), 1.09 (t,  $J = 7.5$  Hz, 3H).

$^{13}\text{C NMR}$  (101 MHz, Chloroform-*d*)  $\delta$  169.0, 153.4, 149.5, 138.5, 128.4, 127.6, 127.1, 123.4, 83.3, 47.8, 28.0, 25.7, 12.5.

**HRMS** (ESI)  $m/z$ :  $[M + \text{Na}]^+$  calcd for  $\text{C}_{17}\text{H}_{23}\text{NO}_3\text{Na}^+$ : 312.1570, found: 312.1570.

**[1,1'-Biphenyl]-4-yl (*E*)-pent-2-enoate (**6**)**

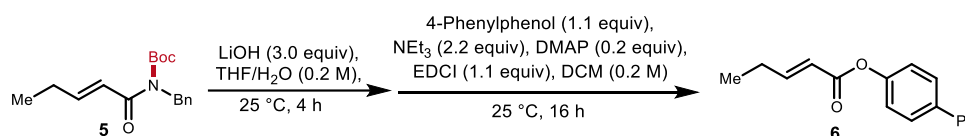

To a solution of *tert*-butyl (*E*)-benzyl(pent-2-enoyl)carbamate **5** (57.9 mg, 0.20 mmol, 1.0 equiv) in THF (0.5 mL) and  $\text{H}_2\text{O}$  (0.5 mL) was added  $\text{LiOH}\cdot\text{H}_2\text{O}$  (25.2 mg, 0.60

mmol, 3.0 equiv). The reaction mixture was allowed to stir for 2.5 h at 25 °C. The reaction was washed by DCM (3 × 2 mL), the aqueous layer was acidified with hydrochloric acid and extracted with DCM (3 × 2 mL). The combined organic layers were dried over anhydrous Na<sub>2</sub>SO<sub>4</sub>, filtered and concentrated under reduced pressure. The crude product (*E*)-pent-2-enoic acid was used directly for next step reaction without purification.

To a solution of (*E*)-pent-2-enoic acid in DCM (1.5 mL) was added *N*-(3-dimethylaminopropyl)-*N'*-ethylcarbodiimide hydrochloride (42.2 mg, 0.22 mmol, 1.1 equiv), 4-dimethylaminopyridine (4.9 mg, 0.04 mmol, 0.20 equiv) and triethylamine (45.8 μL, 0.44 mmol, 2.2 equiv). The reaction mixture was allowed to stir for 16 h at 25 °C. The reaction was concentrated and the residue was purified by flash chromatography (eluent: petroleum ether/ethyl acetate = 10:1) to afford [1,1'-biphenyl]-4-yl (*E*)-pent-2-enoate **6** as a white solid.

**R<sub>f</sub>** = 0.8 (Eluent: petroleum ether/ ethyl acetate =10:1).

**Yield** 44.1 mg (87%).

**NMR Spectroscopy:**

**<sup>1</sup>H NMR** (400 MHz, Chloroform-*d*) δ 7.61 – 7.55 (m, 4H), 7.43 (t, *J* = 7.6 Hz, 2H), 7.36 – 7.29 (m, 1H), 7.28 – 7.21 (m, 1H), 7.21 – 7.16 (m, 2H), 6.04 (d, *J* = 15.7 Hz, 1H), 2.36 – 2.09 (m, 2H), 1.14 (t, *J* = 7.4 Hz, 3H).

**<sup>13</sup>C NMR** (101 MHz, Chloroform-*d*) δ 165.3, 153.3, 150.4, 140.6, 139.0, 128.9, 128.3, 127.4, 127.3, 122.0, 119.8, 25.7, 12.2.

**HRMS** (ESI) *m/z*: [M + H]<sup>+</sup> calcd for C<sub>17</sub>H<sub>17</sub>NO<sub>2</sub><sup>+</sup>: 253.1223, found: 253.1220.

## 7. Synthesis of llepcimide

### 3-(Benzo[*d*][1,3]dioxol-5-yl)-*N*-methyl-*N*-(tosyloxy)propanamide (**8**)

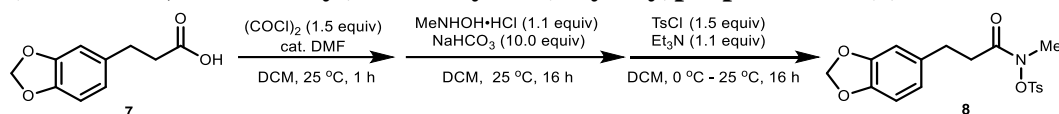

Prepared following **General Procedure A** using 3-(benzo[*d*][1,3]dioxol-5-yl)propanoic acid **7** (500.0 mg, 2.5 mmol, 1.0 equiv), *N*-methylhydroxylamine hydrochloride (250.0 mg, 2.8 mmol, 1.1 equiv) and Et<sub>3</sub>N (381.5 μL, 2.8 mmol, 1.1 equiv) as starting materials to afford **8** as a colourless oil.

**R<sub>f</sub>** = 0.4 (Eluent: petroleum ether/ ethyl acetate = 5:1).

**Yield** 909.4 mg (96%).

#### NMR Spectroscopy:

**<sup>1</sup>H NMR** (400 MHz, Chloroform-*d*) δ 7.85 (d, *J* = 8.4 Hz, 2H), 7.43 – 7.36 (m, 2H), 6.69 (d, *J* = 8.3 Hz, 1H), 6.52 – 6.50 (m, 2H), 5.92 (s, 2H), 3.13 (d, *J* = 1.9 Hz, 3H), 2.69 (t, *J* = 7.7 Hz, 2H), 2.48 (s, 3H), 2.44 – 2.41 (m, 2H).

**<sup>13</sup>C NMR** (101 MHz, Chloroform-*d*) δ 177.7, 147.7, 147.0, 146.0, 134.4, 130.9, 130.4, 129.5, 121.2, 108.9, 108.3, 100.9, 38.4, 34.6, 29.7, 22.0.

**HRMS** (ESI) *m/z*: [M + H]<sup>+</sup> calcd for C<sub>18</sub>H<sub>20</sub>NO<sub>6</sub>S<sup>+</sup>: 378.1006, found: 378.1001.

### (*E*)-3-(Benzo[*d*][1,3]dioxol-5-yl)-*N*-methylacrylamide (**9**)

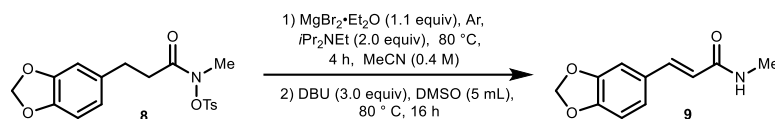

Under argon atmosphere, 3-(benzo[*d*][1,3]dioxol-5-yl)-*N*-methyl-*N*-(tosyloxy)propanamide (566.1 mg, 1.50 mmol, 1.0 equiv), magnesium bromide ethyl etherate (426.0 mg, 1.65 mmol, 1.1 equiv), dry acetonitrile (5.0 mL) and *N*-ethyldiisopropylamine (517.5 μL, 3.00 mmol, 2.0 equiv) were added successively to a 10 mL Schlenk tube with a magnetic bar. The sealed tube was then stirred at 80 °C for 4 h or more until the starting materials were consumed completely.

Then DBU (90.0 μL, 0.60 mmol, 3.0 equiv) and dry DMSO (5.0 mL) were added to the mixture under argon atmosphere. The sealed tube was then vigorously stirred at 80 °C for 16 h before being washed with H<sub>2</sub>O (10.0 mL). The aqueous phase was extracted with ethyl acetate (3 × 20.0 mL). After that, the organic phase was dried over anhydrous Na<sub>2</sub>SO<sub>4</sub>, filtered, and concentrated under reduced pressure. The residual was purified by column chromatography on silica gel (eluent: petroleum ether/ethyl acetate = 1:1) to afford (*E*)-3-(benzo[*d*][1,3]dioxol-5-yl)-*N*-methylacrylamide **9** as a white solid

**R<sub>f</sub>** = 0.1 (Eluent: petroleum ether/ethyl acetate = 1:1).

**Yield** 190.9 mg (80%).

#### NMR Spectroscopy:

**<sup>1</sup>H NMR** (400 MHz, Chloroform-*d*) δ 7.50 (dd, *J* = 15.6, 3.7 Hz, 1H), 6.93 (d, *J* =

14.6 Hz, 2H), 6.80 – 6.68 (m, 1H), 6.43 – 6.18 (m, 2H), 5.95 (d,  $J = 3.9$  Hz, 2H), 2.91 (s, 3H).

$^{13}\text{C}$  NMR (101 MHz, Chloroform- $d$ )  $\delta$  167.1, 149.0, 148.3, 140.4, 129.4, 123.8, 118.9, 108.5, 106.4, 101.5, 26.6.

HRMS (ESI)  $m/z$ :  $[M + H]^+$  calcd for  $\text{C}_{11}\text{H}_{12}\text{NO}_3$ : 206.0812, found: 206.0806.

**(*E*)-3-(Benzo[*d*][1,3]dioxol-5-yl)-1-(piperidin-1-yl)prop-2-en-1-one (llepcimide)**

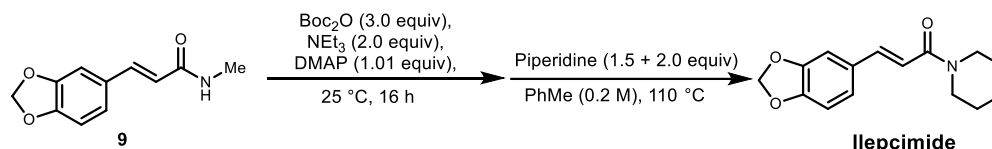

To a flame-dried 10 mL flask was added (*E*)-3-(benzo[*d*][1,3]dioxol-5-yl)-*N*-methylacrylamide **9** (184.6 mg, 0.90 mmol, 1.0 equiv), di-*tert*-butyl decarbonate (620.3  $\mu\text{L}$ , 2.70 mmol, 3.0 equiv), triethylamine (249.7  $\mu\text{L}$ , 1.80 mmol, 2.0 equiv), 4-dimethylaminopyridine (111.1 mg, 0.91 mmol, 1.01 equiv) and DCM (5 mL) was added. The resulting mixture was stirred 25 °C until complete consumption of starting material as indicated by TLC. The mixture was filtered through a pad of silica gel (eluent: petroleum ether/ethyl acetate = 3:1) and the filtrate was concentrated under reduced pressure. to afford crude *tert*-butyl (*E*)-(3-(benzo[*d*][1,3]dioxol-5-yl)acryloyl)(methyl)carbamate as a white solid, which can be used for the next step without further purification (259.4 mg, 94%).

To a solution of crude *tert*-butyl (*E*)-(3-(benzo[*d*][1,3]dioxol-5-yl)acryloyl)(methyl)carbamate (54.9 mg, 0.18 mmol, 1.0 equiv) in PhMe (1.0 mL) was added piperidine (29.6  $\mu\text{L}$ , 0.30 mmol, 1.5 equiv)<sup>4</sup>. The reaction mixture was allowed to stir for 12 h at 110 °C. Then the additional piperidine (39.5  $\mu\text{L}$ , 0.40 mmol, 2.0 equiv) was added to the mixture. The sealed tube was then vigorously stirred at 110 °C for 12 h. The reaction was concentrated and the residue was purified by flash chromatography (eluent: petroleum ether/ethyl acetate = 1:1) to afford **llepcimide** as a yellow oil.

$R_f = 0.1$  (Eluent: petroleum ether/ethyl acetate = 1:1).

**Yield** 29.1 mg (62%).

**NMR Spectroscopy:**

$^1\text{H}$  NMR (400 MHz, Chloroform- $d$ )  $\delta$  7.55 (d,  $J = 15.3$  Hz, 1H), 7.02 (d,  $J = 1.7$  Hz, 1H), 6.98 (dd,  $J = 8.0, 1.7$  Hz, 1H), 6.78 (d,  $J = 8.0$  Hz, 1H), 6.72 (d,  $J = 15.3$  Hz, 1H), 5.98 (s, 2H), 3.60 (d,  $J = 31.3$  Hz, 4H), 1.69 – 1.64 (m, 2H), 1.62 – 1.56 (m, 4H).

$^{13}\text{C}$  NMR (101 MHz, Chloroform- $d$ )  $\delta$  165.6, 148.9, 148.3, 142.1, 130.0, 123.7, 115.8, 108.6, 106.4, 101.5, 47.1, 43.5, 26.9, 25.7, 24.8.

HRMS (ESI)  $m/z$ :  $[M + H]^+$  calcd for  $\text{C}_{15}\text{H}_{18}\text{NO}_3^+$ : 260.1281, found: 260.1274.



## 8. Reactivity of different leaving groups

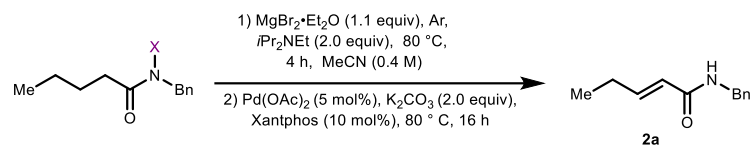

Under argon atmosphere, starting materials containing different leaving groups (0.20 mmol, 1.0 equiv), magnesium bromide ethyl etherate (56.8 mg, 0.22 mmol, 1.1 equiv), dry acetonitrile (0.5 mL) and *N*-ethyldiisopropylamine (69.0  $\mu\text{L}$ , 0.40 mmol, 2.0 equiv) were added successively to a 10 mL Schlenk tube with a magnetic bar. The sealed tube was then stirred at 80 °C for 4 h.

Then palladium (II) acetate (2.3 mg, 0.01 mmol, 0.05 equiv), Xantphos (11.6 mg, 0.02 mmol, 0.10 equiv) and  $\text{K}_2\text{CO}_3$  (55.5 mg, 0.40 mmol, 2.0 equiv) were added to the mixture under argon atmosphere. The sealed tube was then vigorously stirred at 80 °C for 16 h. The mixture was filtered through a pad of silica gel and the filtrate was concentrated under reduced pressure. The yield was determined by  $^1\text{H}$  NMR analysis with 1,3,5-trimethoxybenzene as an internal standard. The results were shown in the **Table S5** below.

**Table S5.  $^1\text{H}$  NMR yield of different leaving groups**

| X                      | OTs | Cl | OAc | OMe |
|------------------------|-----|----|-----|-----|
| $^1\text{H}$ NMR yield | 82% | 0% | 0%  | 0%  |

## 9. Potential intermediate for the dehydrogenation

### *N*-Benzyl-2-bromopentanamide (**10**)

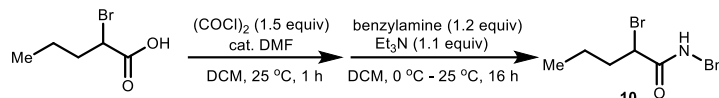

To a stirred solution of 2-bromopentanoic acid (262  $\mu\text{L}$ , 2.0 mmol, 1.0 equiv) in dichloromethane (2.0 mL), was added 2 drops *N,N*-dimethylformamide. Then oxalyl chloride (200.0  $\mu\text{L}$ , 2.2 mmol, 1.1 equiv) was added slowly into the mixture. The reaction was stirred at 25 °C for 1 h before being concentrated.

To a stirred solution of mixture was added benzylamine (262  $\mu\text{L}$ , 2.4 mmol, 1.2 equiv). A solution of  $\text{Et}_3\text{N}$  (305.0  $\mu\text{L}$ , 2.2 mmol, 1.1 equiv) in dichloromethane (1.0 mL) was charged slowly into reaction at 0 °C. The reaction was stirred at 25 °C for 16 h before being washed with  $\text{H}_2\text{O}$  (5.0 mL). The aqueous phase was extracted with dichloromethane ( $3 \times 5.0$  mL). After that, the organic phase was dried over anhydrous  $\text{Na}_2\text{SO}_4$ , filtered and concentrated under reduced. The residual was purified by column chromatography on silica gel to afford *N*-benzyl-2-bromopentanamide **10** as a white solid. All analytical data were in good accordance with data reported in the literature.<sup>5</sup>

#### NMR Spectroscopy:

$^1\text{H}$  NMR (400 MHz, Chloroform-*d*)  $\delta$  7.40 – 7.26 (m, 5H), 6.68 (br, 1H), 4.47 (d,  $J = 5.8$  Hz, 2H), 4.37 (dd,  $J = 8.4, 5.1$  Hz, 1H), 2.22 – 2.09 (m, 1H), 2.08 – 1.95 (m, 1H), 1.58 – 1.44 (m, 2H), 0.96 (t,  $J = 7.4$  Hz, 3H).

$^{13}\text{C}$  NMR (101 MHz, Chloroform-*d*)  $\delta$  168.9, 137.7, 128.9, 127.84, 127.79, 52.0, 44.3, 38.1, 20.7, 13.4.

### (*E*)-*N*-Benzylpent-2-enamide (**2a**)

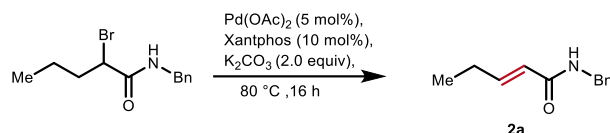

Under argon atmosphere, *N*-benzyl-2-bromopentanamide **10** (54.0 mg, 0.20 mmol, 1.0 equiv), palladium (II) acetate (2.3 mg, 0.01 mmol, 0.05 equiv), Xantphos (11.6 mg, 0.02 mmol, 0.10 equiv),  $\text{K}_2\text{CO}_3$  (55.5 mg, 0.40 mmol, 2.0 equiv) and dry acetonitrile (0.5 mL) were added successively to a 10 mL Schlenk tube with a magnetic bar. The sealed tube was then stirred at 80 °C for 16 h. The mixture was filtered through a pad of silica gel and the filtrate was concentrated under reduced pressure. The residual was purified by column chromatography on silica gel (eluent: petroleum ether/ ethyl acetate =3:1) to afford (*E*)-*N*-benzylpent-2-enamide **2a** as a white solid in 79% yield. (29.9 mg)

## 10. Kinetic Isotope Effect Studies

### *N*-Methyl-5-phenyl-*N*-(tosyloxy)pentanamide-2,2-d<sub>2</sub> (**1aa- $\alpha$ -D**)

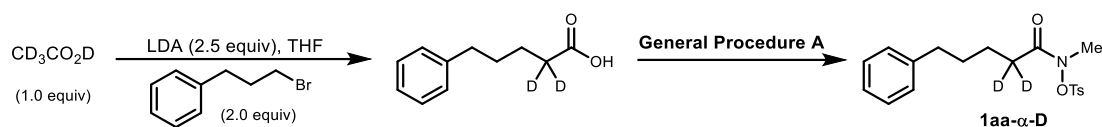

To a solution of lithium diisopropylamide (2.5 mL, 5.0 mmol, 2.5 equiv) in THF (2 M) was added the acetic acid-d<sub>4</sub> (112.4  $\mu$ L, 2.0 mmol, 1.0 equiv) via syringe dropwise at 0 °C.<sup>6</sup> The resulting mixture was stirred at 0 °C for 5 minutes. Then it was heated at reflux for 3 hours. After cooling down to room temperature, 1-bromo-3-phenylpropane (607.9  $\mu$ L, 4.0 mmol, 2.0 equiv) was added dropwise, then the mixture was heated at reflux overnight. The resulting solution was quenched with water and extracted with EtOAc. The aqueous layer was acidified with 1M HCl and extracted with EtOAc. The combined organic layer was washed with brine and dried over Na<sub>2</sub>SO<sub>4</sub>. After filtration and concentration, the obtained crude acid was used in next step without further purification. The next step follows the **General Procedure A** to afford *N*-methyl-5-phenyl-*N*-(tosyloxy)pentanamide-2,2-d<sub>2</sub> as a colourless oil.

**Yield** 261.2 mg (36%).

#### NMR Spectroscopy:

**<sup>1</sup>H NMR** (400 MHz, Chloroform-*d*)  $\delta$  7.94 – 7.86 (m, 2H), 7.41 (d,  $J$  = 8.1 Hz, 2H), 7.32 – 7.28 (m, 2H), 7.23 – 7.15 (m, 3H), 3.15 (s, 3H), 2.56 (t,  $J$  = 7.0 Hz, 2H), 2.47 (s, 3H), 1.55 – 1.47 (m, 4H).

**<sup>13</sup>C NMR** (101 MHz, Chloroform-*d*)  $\delta$  178.5, 146.9, 142.3, 130.9, 130.3, 129.5, 128.5, 128.4, 125.9, 38.3, 35.7, 30.9, 23.5, 23.4, 21.9.

**HRMS** (ESI)  $m/z$ : [M + Na]<sup>+</sup> calcd for C<sub>19</sub>H<sub>21</sub>D<sub>2</sub>NO<sub>4</sub>SNa<sup>+</sup>: 386.1366, found: 386.1351.

### *N*-Methyl-5-phenyl-*N*-(tosyloxy)pentanamide-3,3-d<sub>2</sub> (**1aa- $\beta$ -D**)

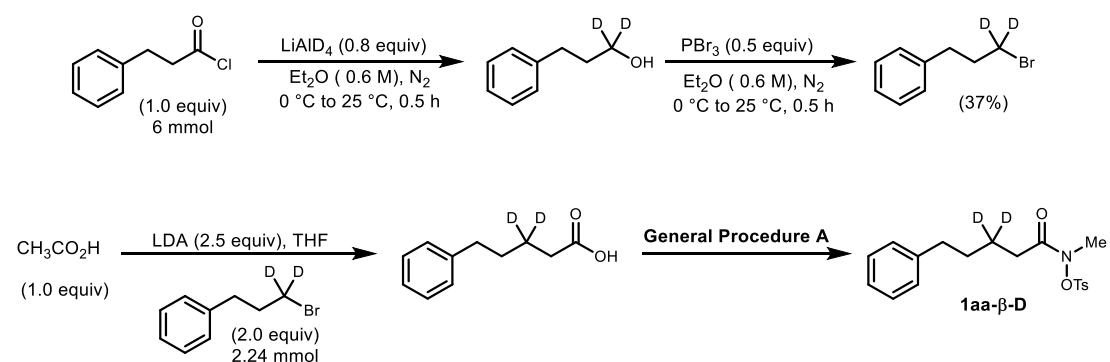

Lithium aluminum deuteride (901.2 mg, 4.8 mmol, 0.8 equiv) was suspended in anhydrous Et<sub>2</sub>O (10.0 mL) and cooled to 0 °C.<sup>7</sup> A solution of hydrocinnamoyl chloride (891.4  $\mu$ L, 6.0 mmol, 1.0 equiv) in Et<sub>2</sub>O (5.0 mL) was added dropwise at 0 °C. The resulting mixture was then allowed to warm up to room temperature and stirred for 2 hours. The resulting solution was quenched with water. The resulting precipitate was

removed by filtration, washed thoroughly with Et<sub>2</sub>O. The filtrate was washed with brine and dried over Na<sub>2</sub>SO<sub>4</sub>. After filtration and concentration, the obtained crude alcohol was used in next step without further purification.

To a solution of the above crude alcohol in anhydrous Et<sub>2</sub>O (20.0 mL) was added PBr<sub>3</sub> (282 μL, 3.0 mmol, 0.5 equiv) via a syringe at 0 °C. The mixture was stirred for 30 minutes at 0 °C and for additional 30 minutes at room temperature. Ice was added to quench the reaction. The organic layer was washed with brine and dried over Na<sub>2</sub>SO<sub>4</sub>. After filtration and concentration, the obtained crude (3-bromopropyl-3,3-d<sub>2</sub>)benzene was used in next step without further purification.

To a solution of lithium diisopropylamide (1.9 mL, 3.8 mmol, 2.5 equiv) in THF (2M) was added the acetic acid (85.9 μL, 1.5 mmol, 1.0 equiv) via syringe dropwise at 0 °C. The resulting mixture was stirred at 0 °C for 5 minutes. Then it was heated at reflux for 3 hours. After cooling down to room temperature, crude (3-bromopropyl-3,3-d<sub>2</sub>)benzene was added dropwise, then the mixture was heated at reflux overnight. The resulting solution was quenched with water and extracted with EtOAc. The aqueous layer was acidified with 1 M HCl and extracted with EtOAc. The combined organic layer was washed with brine and dried over Na<sub>2</sub>SO<sub>4</sub>. After filtration and concentration, the obtained crude acid was used in next step without further purification. The next step follows the **General Procedure A** to afford *N*-methyl-5-phenyl-*N*-(tosyloxy)pentanamide-3,3-d<sub>2</sub> as a colourless oil.

**Yield** 90.0 mg (17%).

**NMR Spectroscopy:**

<sup>1</sup>H NMR (600 MHz, Chloroform-*d*) δ 7.89 (d, *J* = 8.3 Hz, 2H), 7.41 (d, *J* = 8.1 Hz, 2H), 7.31 – 7.28 (m, 2H), 7.20 (t, *J* = 7.3 Hz, 1H), 7.16 (d, *J* = 7.1 Hz, 2H), 3.15 (s, 3H), 2.57 – 2.54 (m, 2H), 2.47 (s, 3H), 2.21 (s, 2H), 1.49 (t, *J* = 7.8 Hz, 2H).

<sup>13</sup>C NMR (101 MHz, Chloroform-*d*) δ 178.5, 146.9, 142.3, 131.0, 130.3, 129.5, 128.5, 128.4, 125.9, 38.4, 35.7, 32.3, 30.8, 21.9.

**HRMS** (ESI) *m/z*: [M + Na]<sup>+</sup> calcd for C<sub>19</sub>H<sub>21</sub>D<sub>2</sub>NO<sub>4</sub>SNa<sup>+</sup>: 386.1366, found: 386.1364.

**Intermolecular competitive KIE experiments** with *N*-methyl-5-phenyl-*N*-(tosyloxy)pentanamide **1aa**, *N*-methyl-5-phenyl-*N*-(tosyloxy)pentanamide-2,2-d<sub>2</sub> **1aa-α-D** and *N*-methyl-5-phenyl-*N*-(tosyloxy)pentanamide-3,3-d<sub>2</sub> **1aa-β-D**

A) Reactions were performed with *N*-methyl-5-phenyl-*N*-(tosyloxy)pentanamide **1aa** (36.1 mg, 0.1 mmol), *N*-methyl-5-phenyl-*N*-(tosyloxy)pentanamide-2,2-d<sub>2</sub> **1aa-α-D** (36.3 mg, 0.1 mmol), Pd(OAc)<sub>2</sub> (2.3 mg, 0.01 mmol) and Xantphos (11.6 mg, 0.02 mmol) and K<sub>2</sub>CO<sub>3</sub> (55.2 mg, 0.40 mmol), 0.5 mL dry acetonitrile, following the general procedure of the desaturation reaction. After the reaction proceeded for 1+14 hours, the reaction solution was filtered through silica gel and the crude <sup>1</sup>H NMR was taken using CH<sub>2</sub>Br<sub>2</sub> as the internal standard.

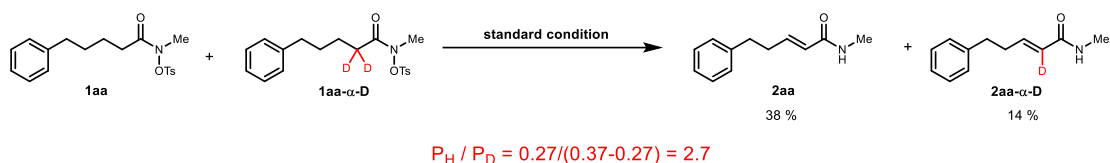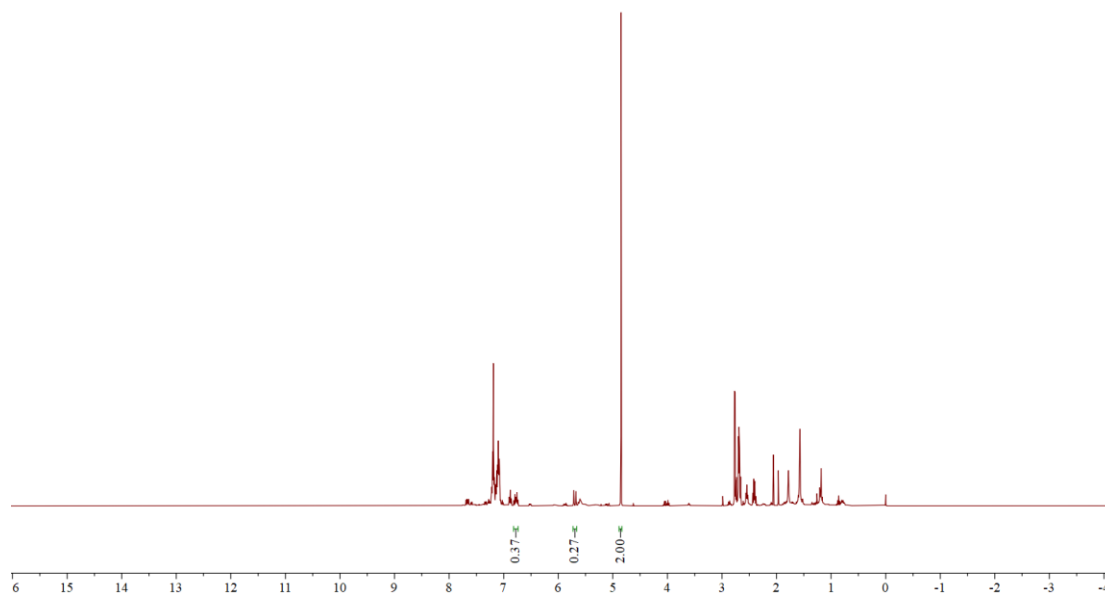

**Figure S2.** KIE experiments between **1aa** and **1aa- $\alpha$ -D** ( $\text{CH}_2\text{Br}_2$  as the internal standard) ( $\text{CDCl}_3$ , 400 MHz)

B) Reactions were performed with *N*-methyl-5-phenyl-*N*-(tosyloxy)pentanamide **1aa** (36.1 mg, 0.1 mmol), *N*-methyl-5-phenyl-*N*-(tosyloxy)pentanamide-3,3- $\text{d}_2$  **1aa- $\beta$ -D** (36.3 mg, 0.1 mmol),  $\text{Pd}(\text{OAc})_2$  (2.3 mg, 0.01 mmol) and Xantphos (11.6 mg, 0.02 mmol) and  $\text{K}_2\text{CO}_3$  (55.2 mg, 0.40 mmol), 0.5 mL dry acetonitrile, following the general procedure of the desaturation reaction. After the reaction proceeded for 4+6 hours, the reaction solution was filtered through silica gel and the crude <sup>1</sup>H NMR was taken using  $\text{CH}_2\text{Br}_2$  as the internal standard.

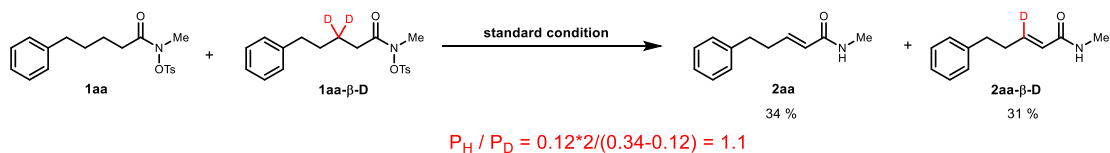

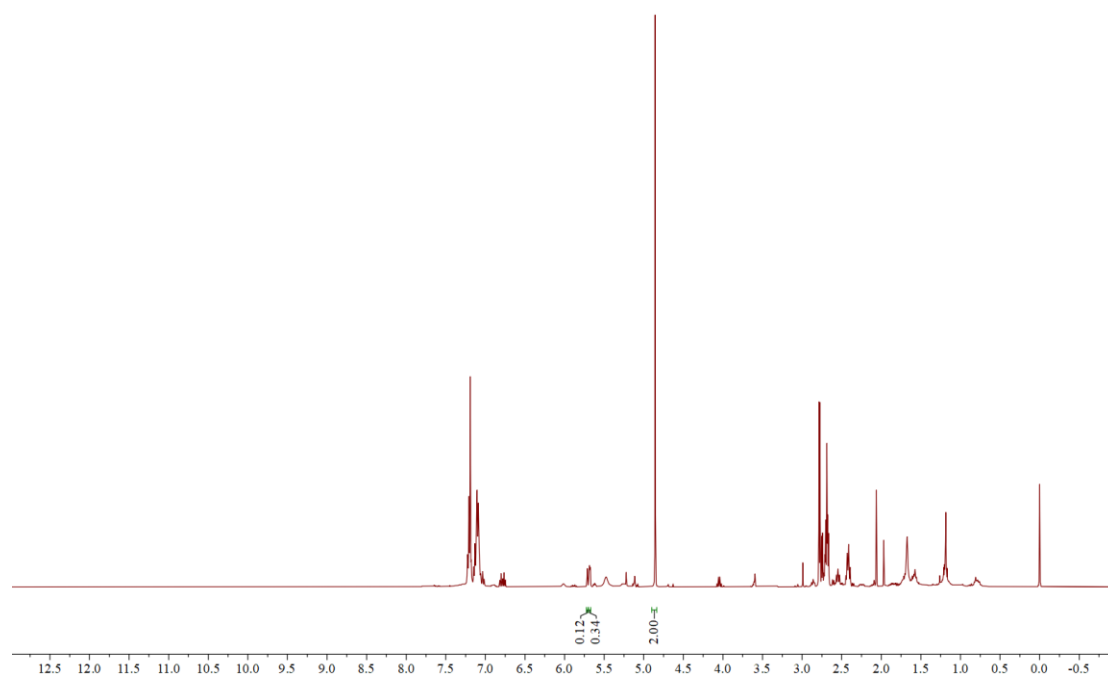

**Figure S3.** KIE experiments between **1aa** and **1aa-β-D** (CH<sub>2</sub>Br<sub>2</sub> as the internal standard) (CDCl<sub>3</sub>, 400 MHz)

## 11. Copies of NMR spectra

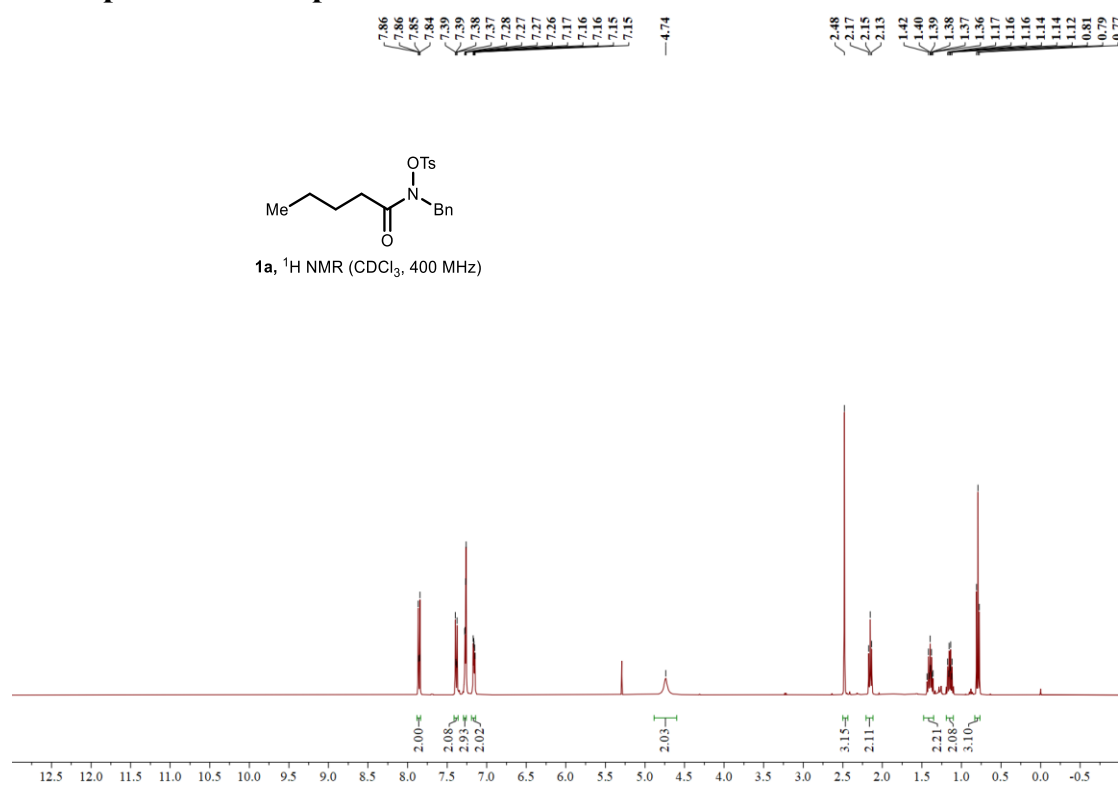

Figure S4.  $^1\text{H}$  NMR of **1a** ( $\text{CDCl}_3$ , 400 MHz)

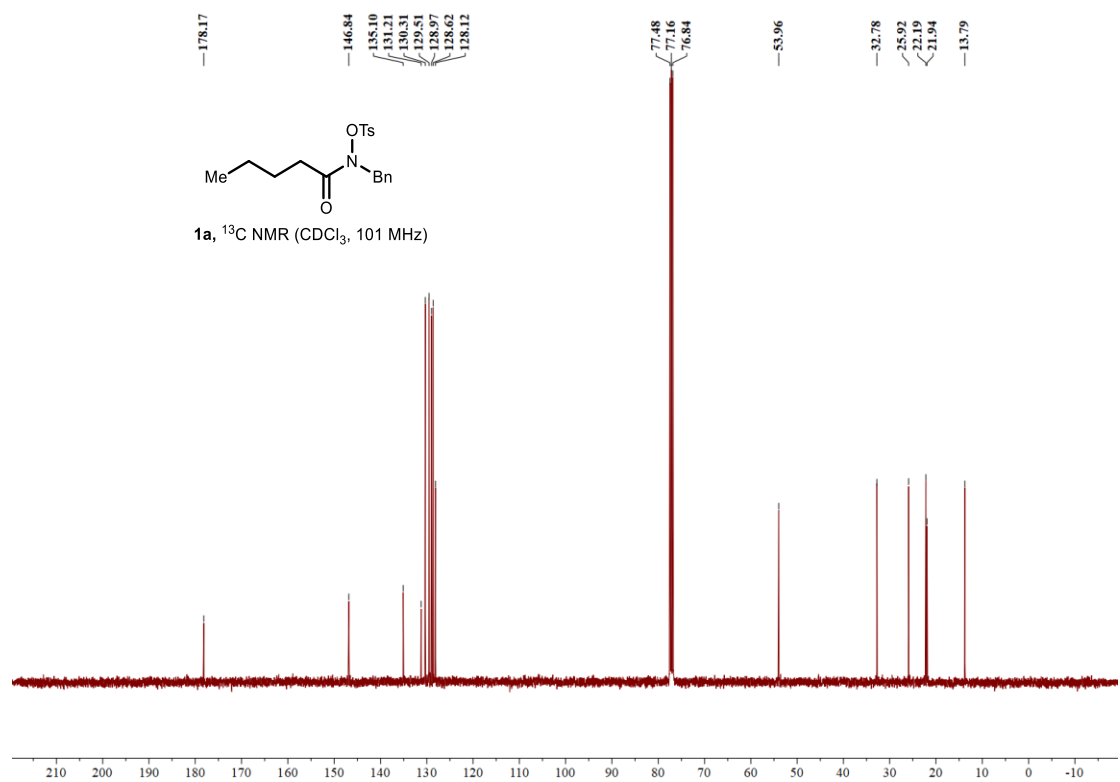

Figure S5.  $^{13}\text{C}$  NMR of **1a** ( $\text{CDCl}_3$ , 101 MHz)

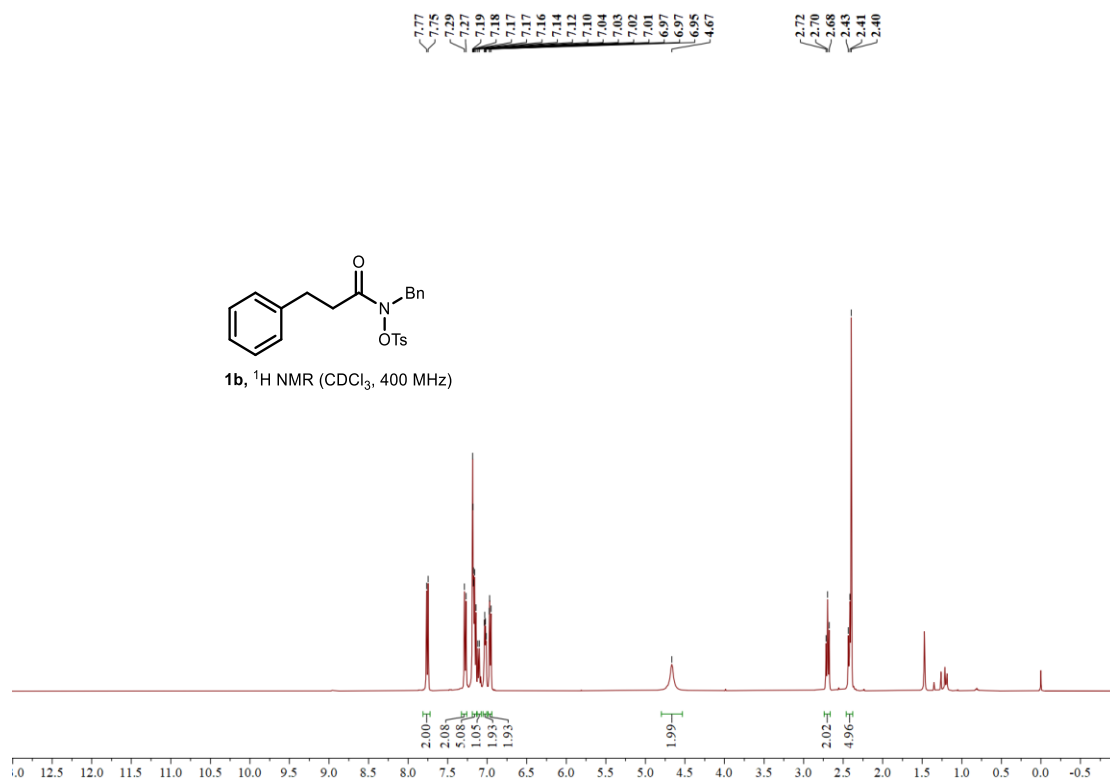

**Figure S6.**  $^1\text{H NMR}$  of **1b** ( $\text{CDCl}_3$ , 400 MHz)

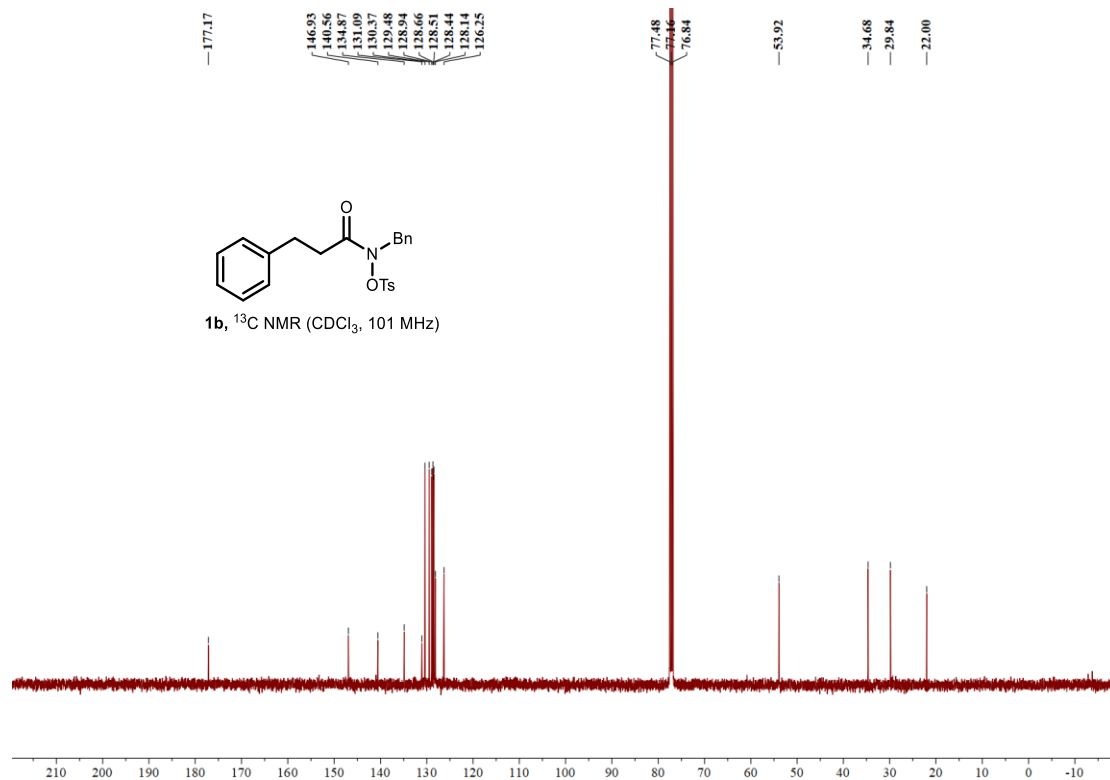

**Figure S7.**  $^{13}\text{C NMR}$  of **1b** ( $\text{CDCl}_3$ , 101 MHz)



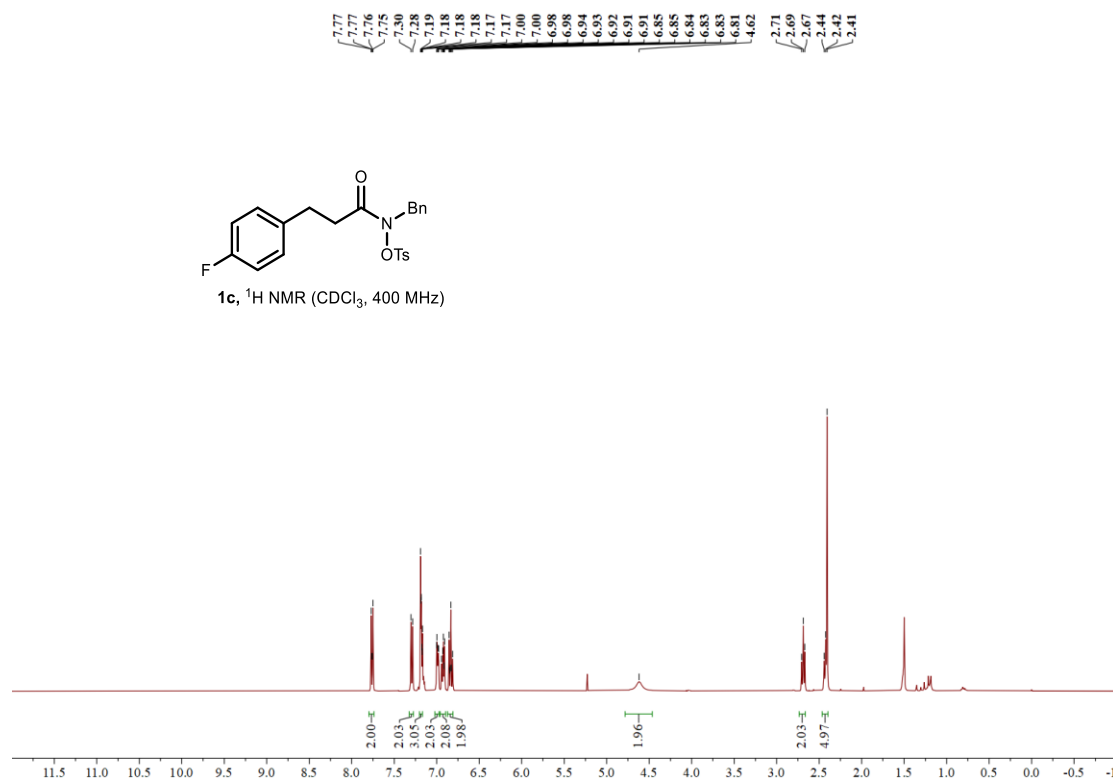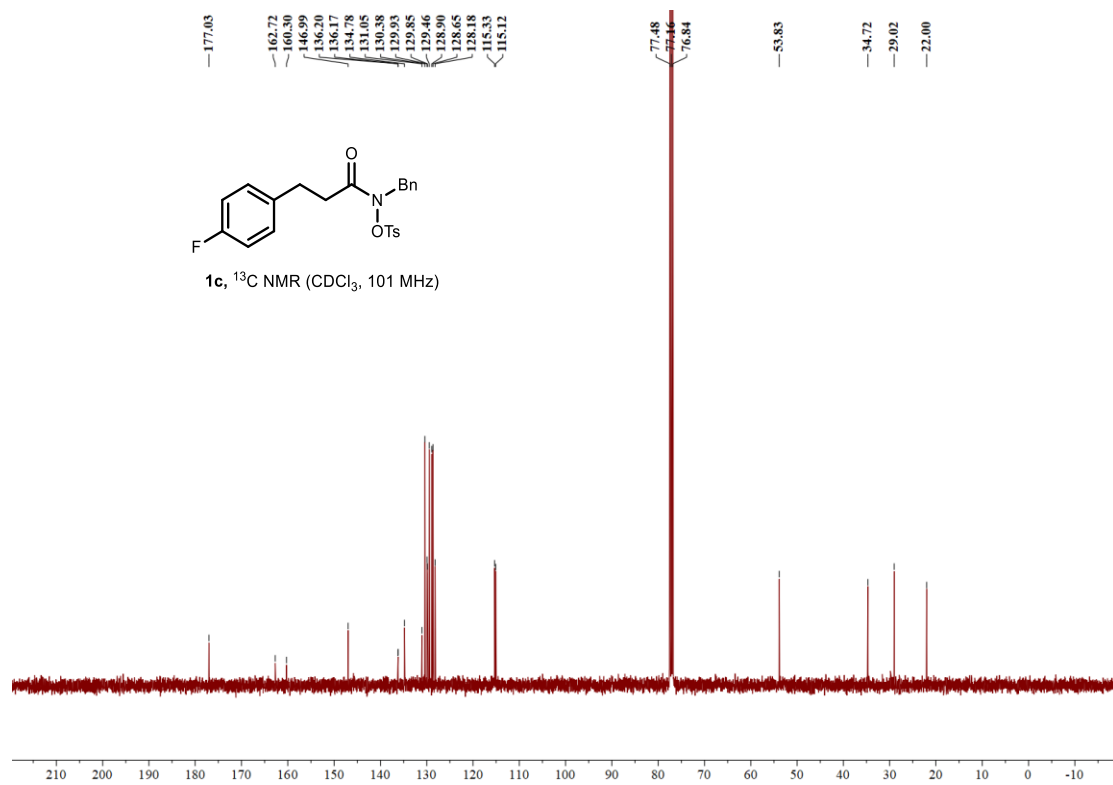

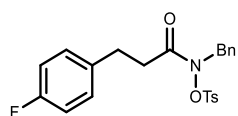

1c, <sup>19</sup>F NMR (CDCl<sub>3</sub>, 377 MHz)

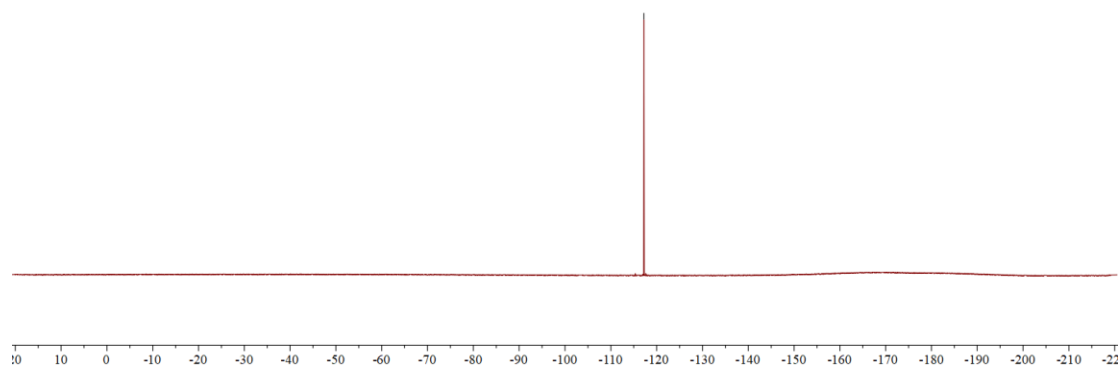

Figure S10. <sup>19</sup>F NMR of 1c (CDCl<sub>3</sub>, 377 MHz)

7.77 7.75 7.30 7.28 7.19 7.18 7.17 7.02 7.01 7.00 6.89 6.87 6.71 6.69 4.65 3.71 2.66 2.64 2.62 2.40 2.38 2.36

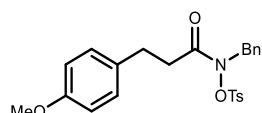

1d, <sup>1</sup>H NMR (CDCl<sub>3</sub>, 400 MHz)

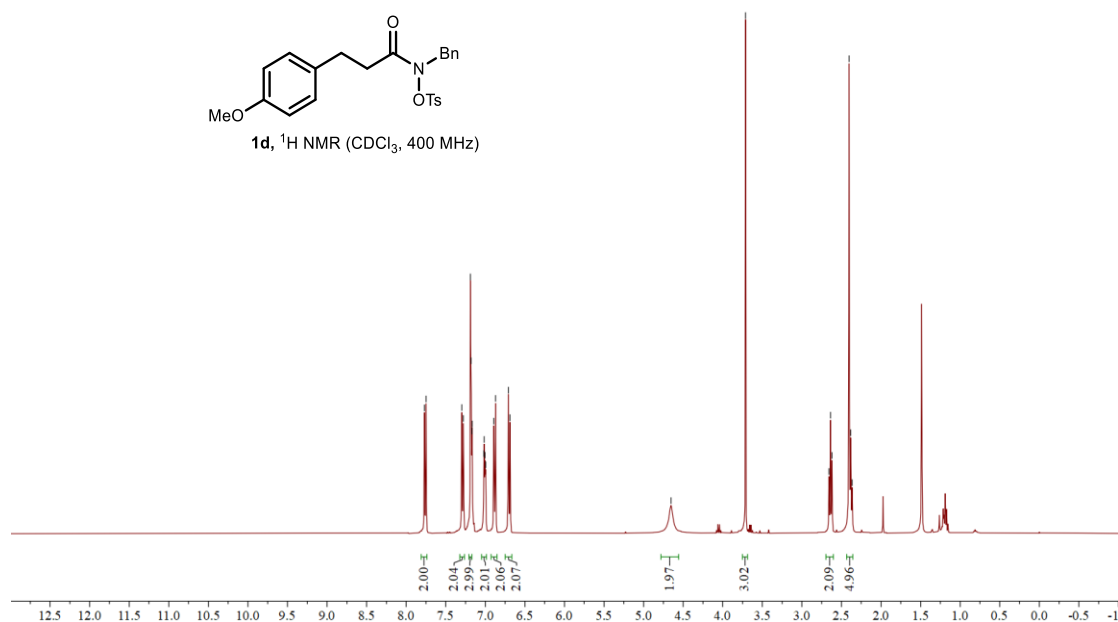

Figure S11. <sup>1</sup>H NMR of 1d (CDCl<sub>3</sub>, 400 MHz)

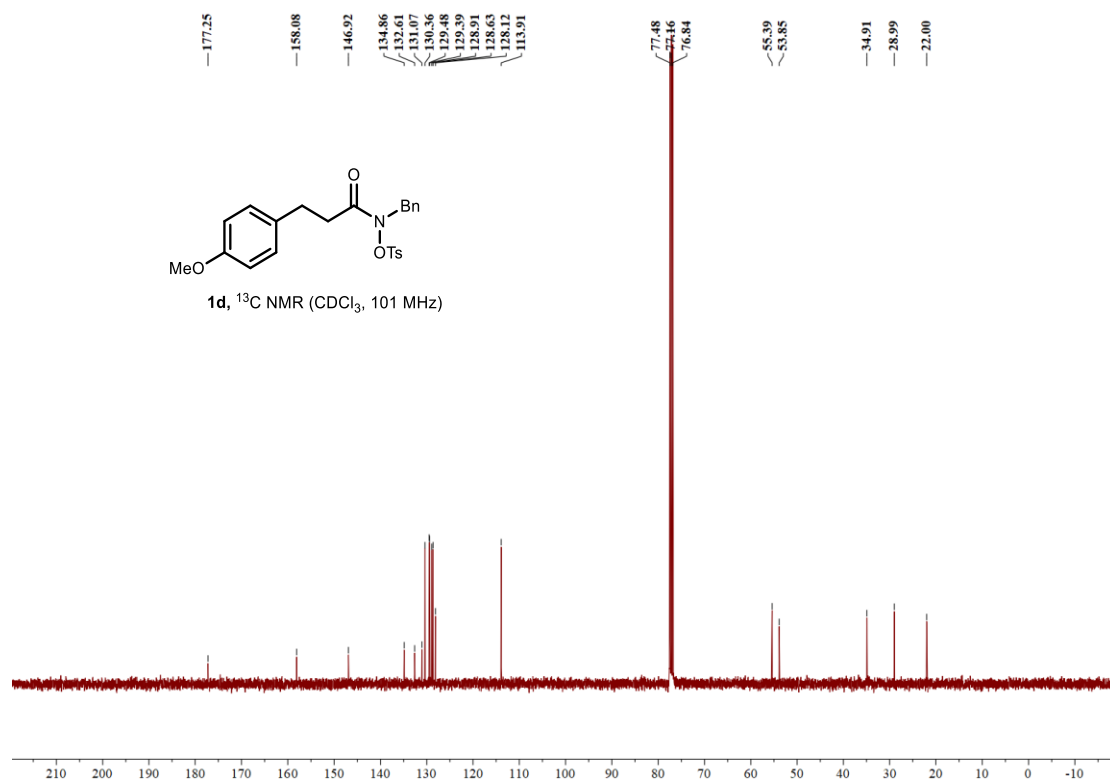

**Figure S12.**  $^{13}\text{C}$  NMR of **1d** ( $\text{CDCl}_3$ , 101 MHz)

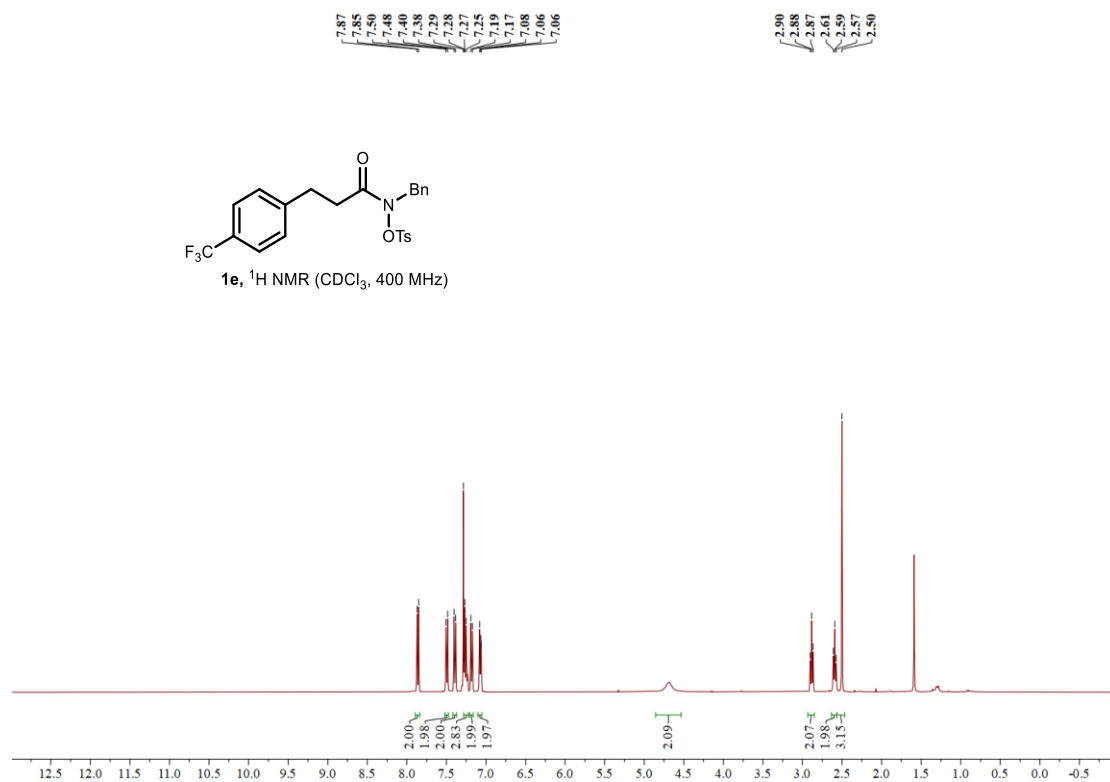

**Figure S13.**  $^1\text{H}$  NMR of **1e** ( $\text{CDCl}_3$ , 400 MHz)

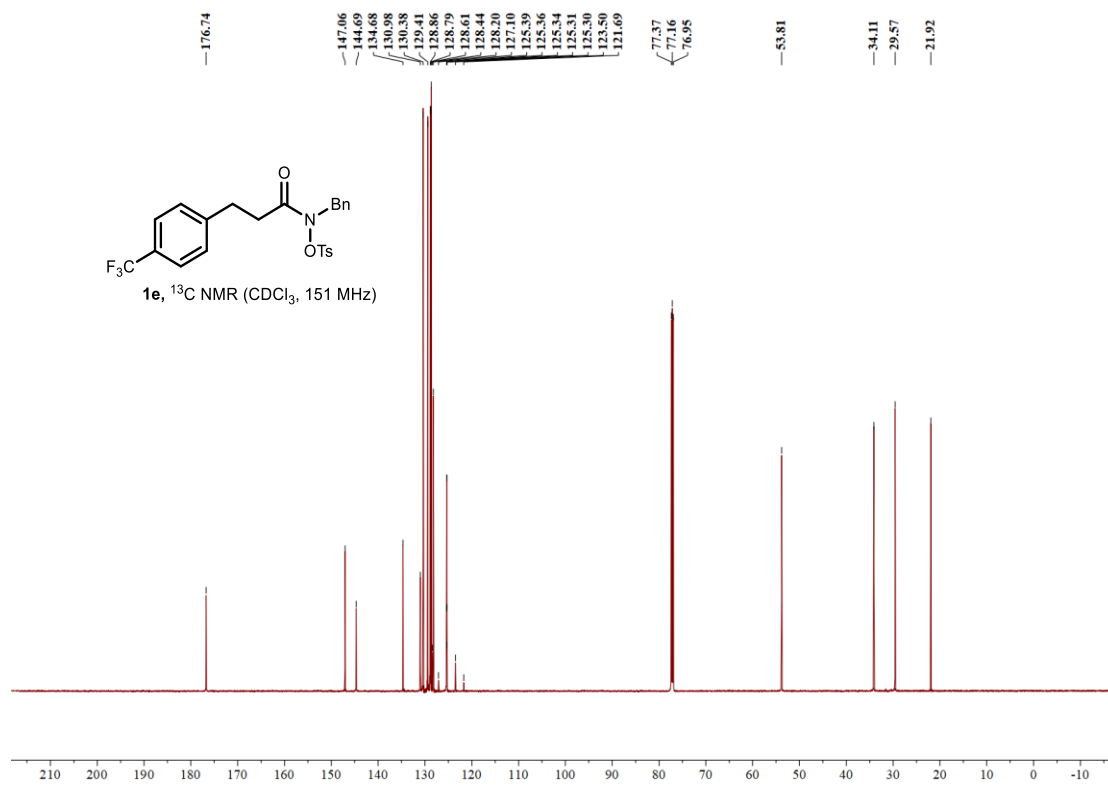

**Figure S14.**  $^{13}\text{C}$  NMR of **1e** ( $\text{CDCl}_3$ , 151 MHz)

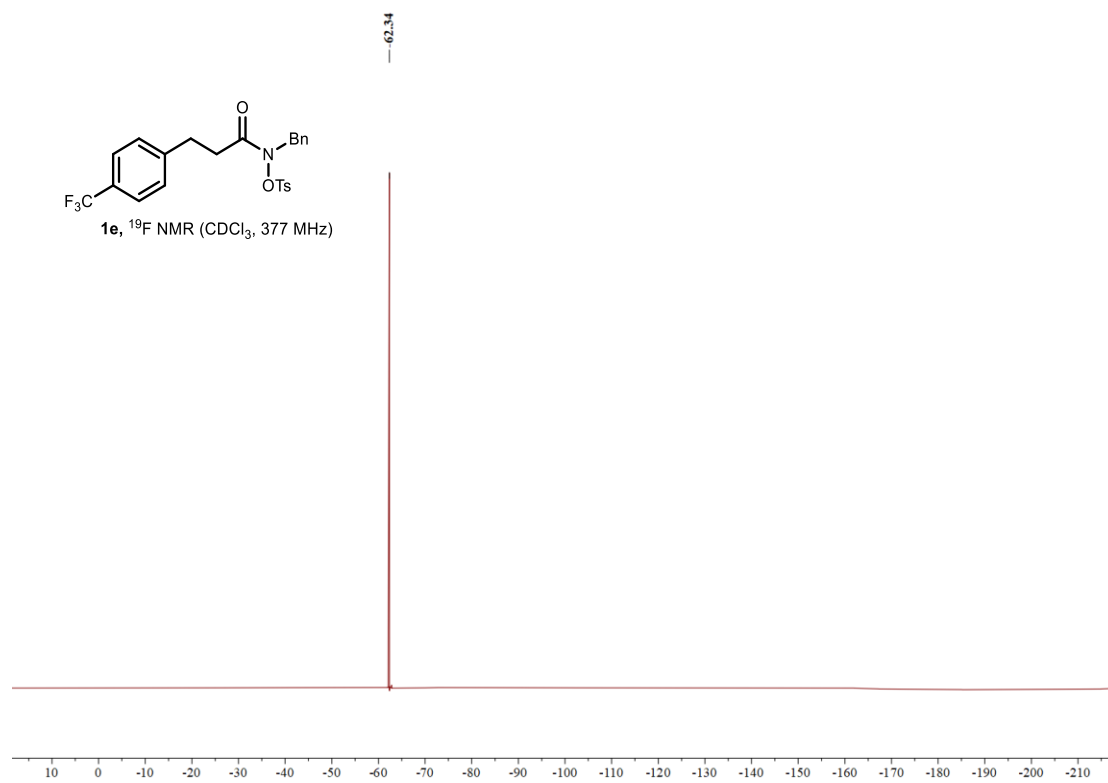

**Figure S15.**  $^{19}\text{F}$  NMR of **1e** ( $\text{CDCl}_3$ , 377 MHz)

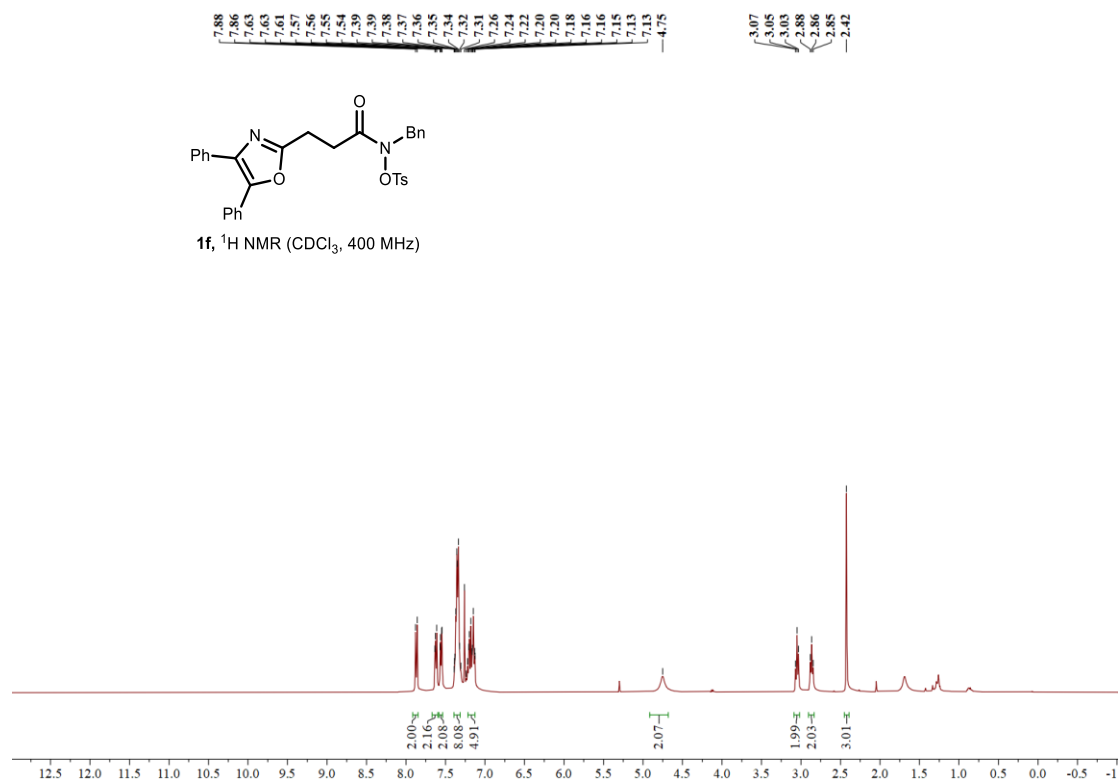

**Figure S16.**  $^1\text{H}$  NMR of **1f** ( $\text{CDCl}_3$ , 400 MHz)

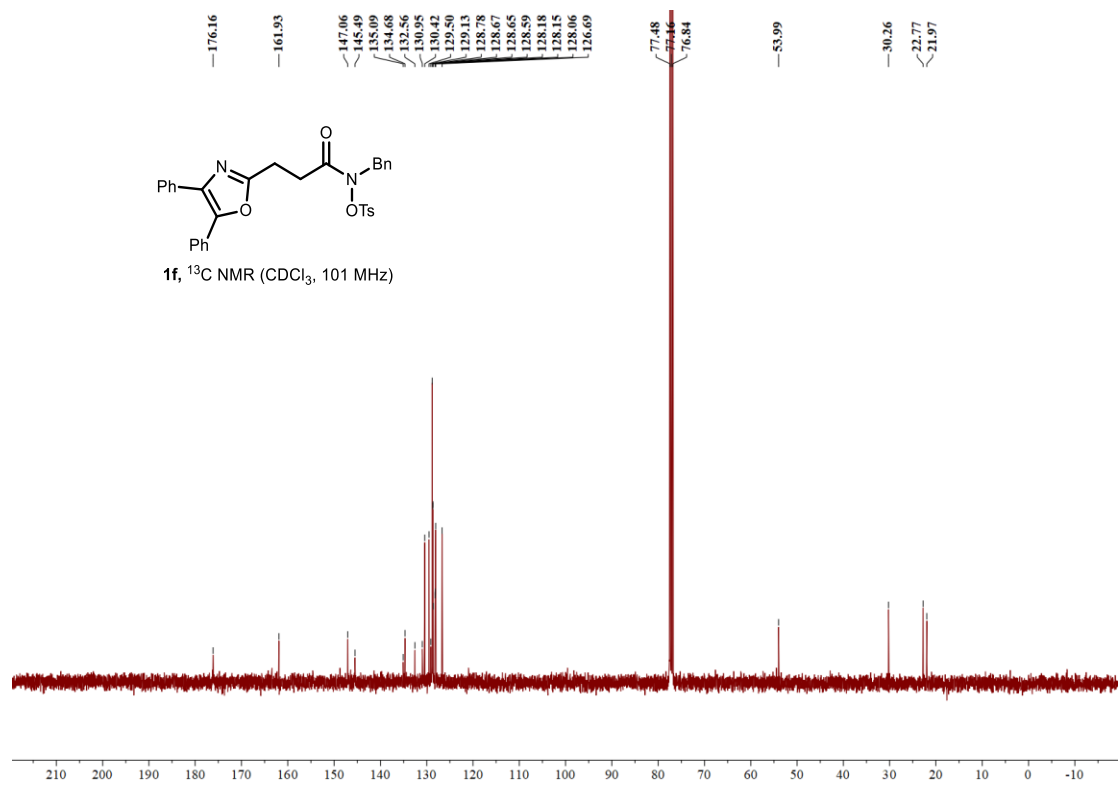

**Figure S17.**  $^{13}\text{C}$  NMR of **1f** ( $\text{CDCl}_3$ , 101 MHz)

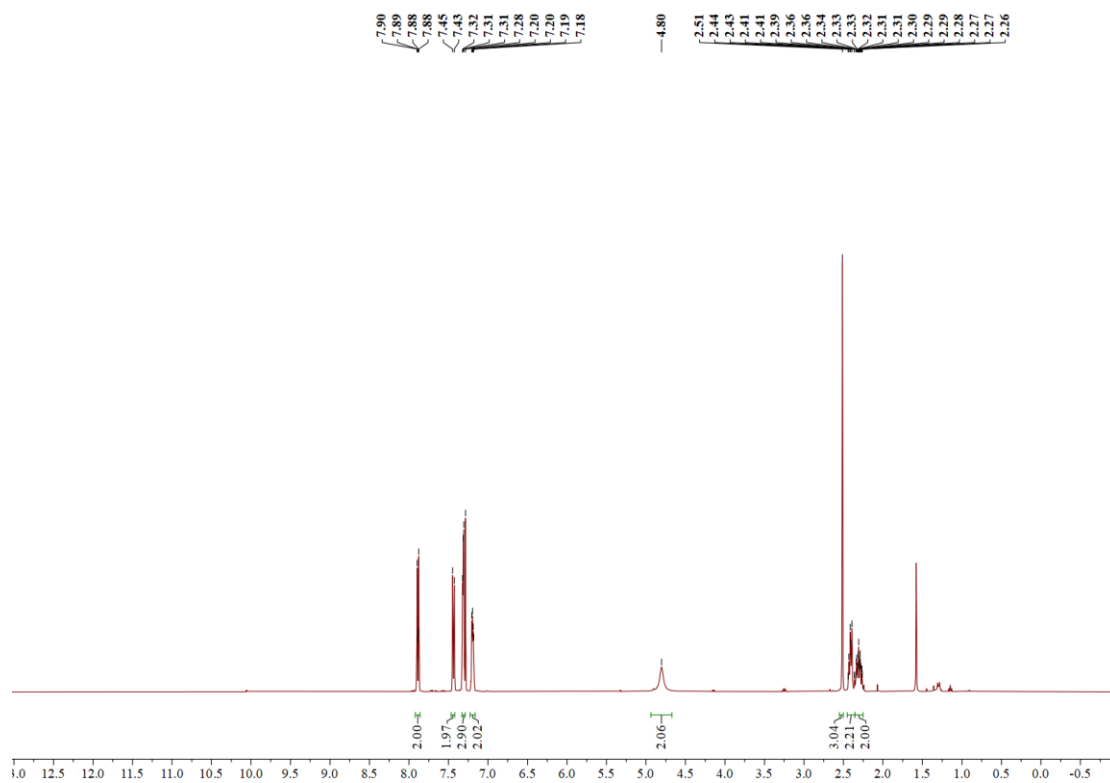

Figure S18.  $^1\text{H}$  NMR of **1g** ( $\text{CDCl}_3$ , 400 MHz)

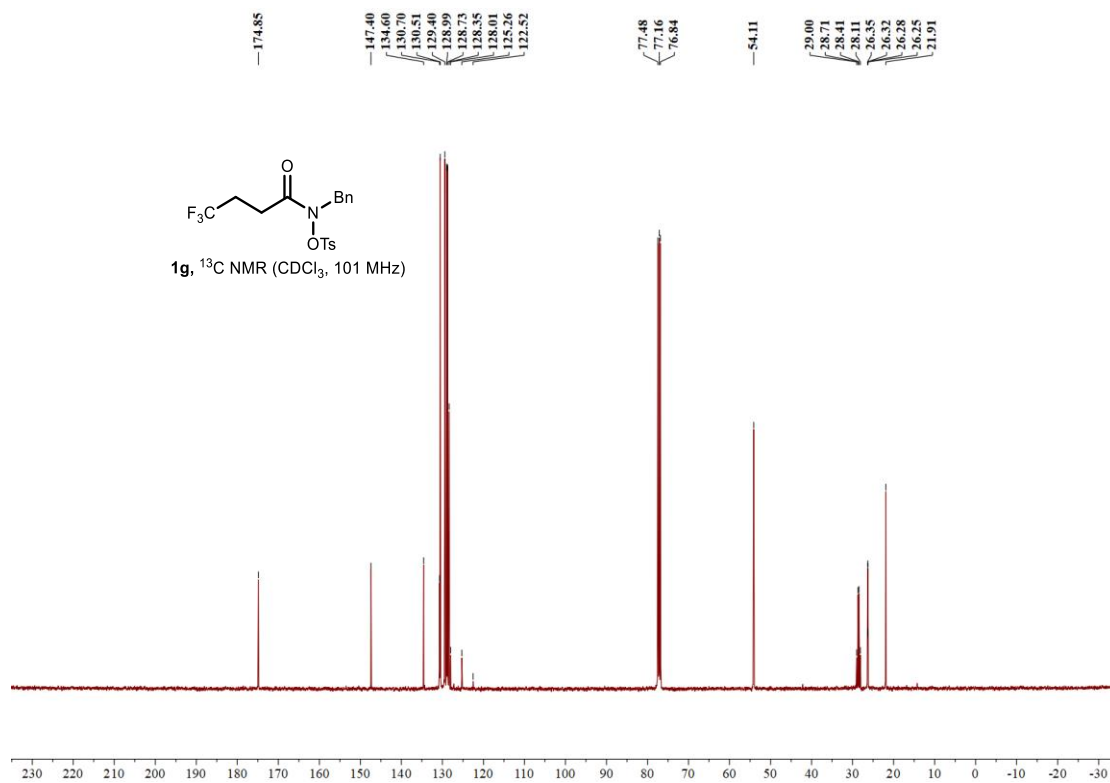

Figure S19.  $^{13}\text{C}$  NMR of **1g** ( $\text{CDCl}_3$ , 101 MHz)

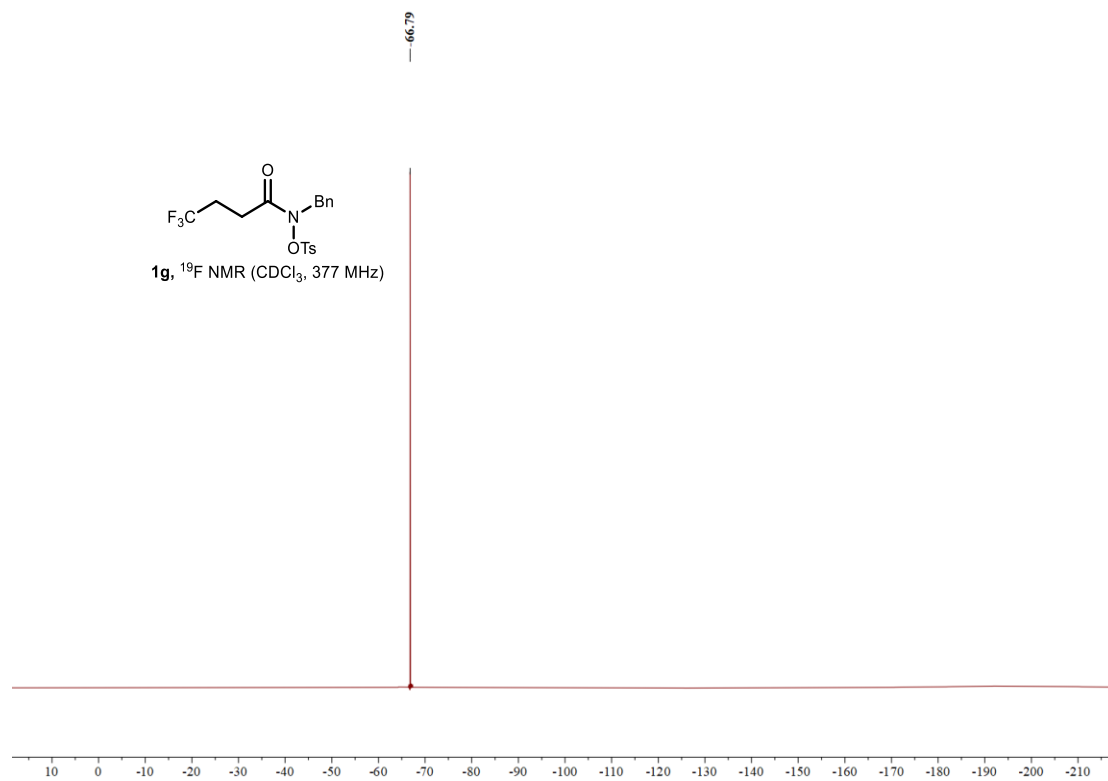

**Figure S20.**  $^{19}\text{F}$  NMR of **1g** ( $\text{CDCl}_3$ , 377 MHz)

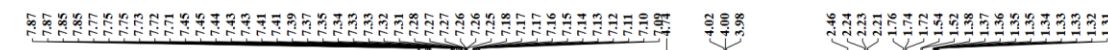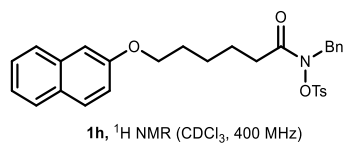

**Figure S21.**  $^1\text{H}$  NMR of **1h** ( $\text{CDCl}_3$ , 400 MHz)

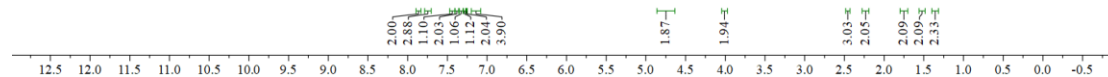

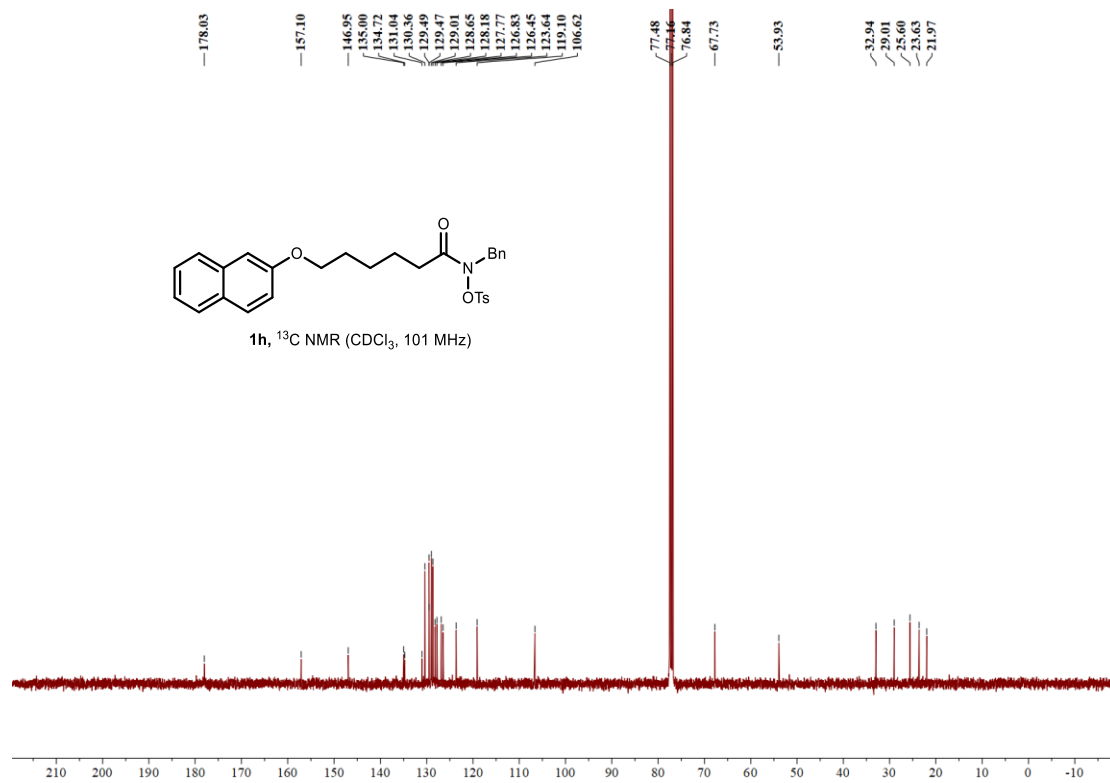

**Figure S22.**  $^{13}\text{C}$  NMR of **1h** ( $\text{CDCl}_3$ , 101 MHz)

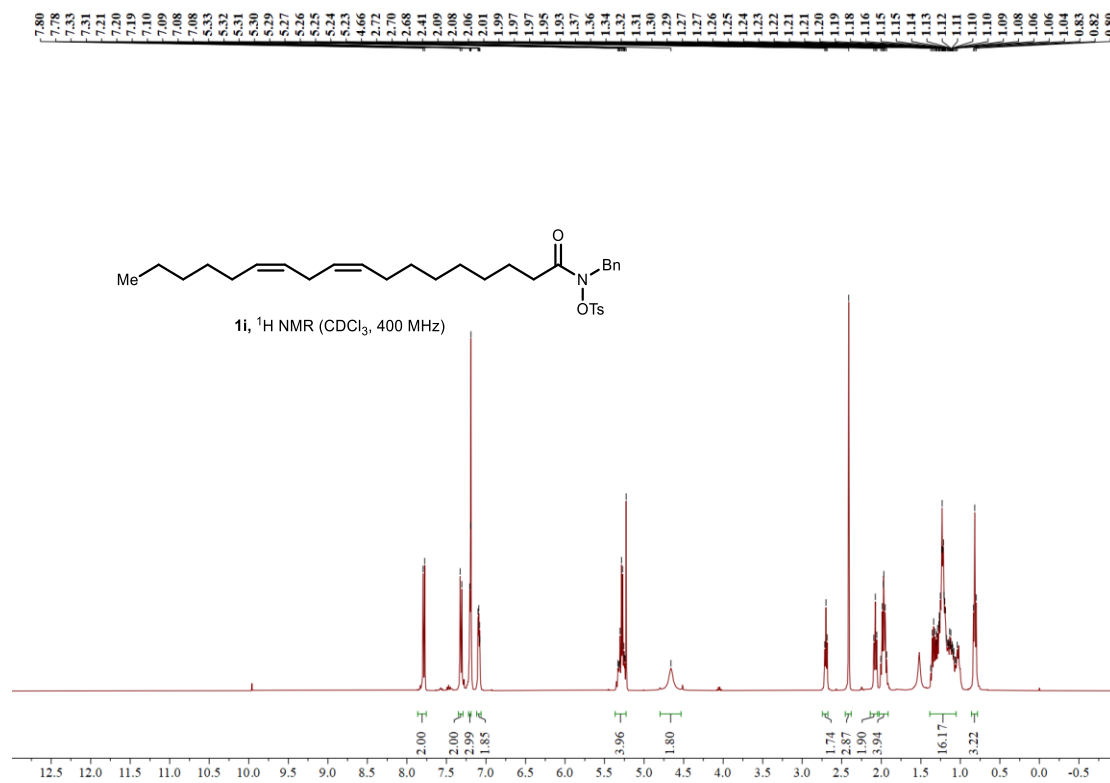

**Figure S23.**  $^1\text{H}$  NMR of **1i** ( $\text{CDCl}_3$ , 400 MHz)



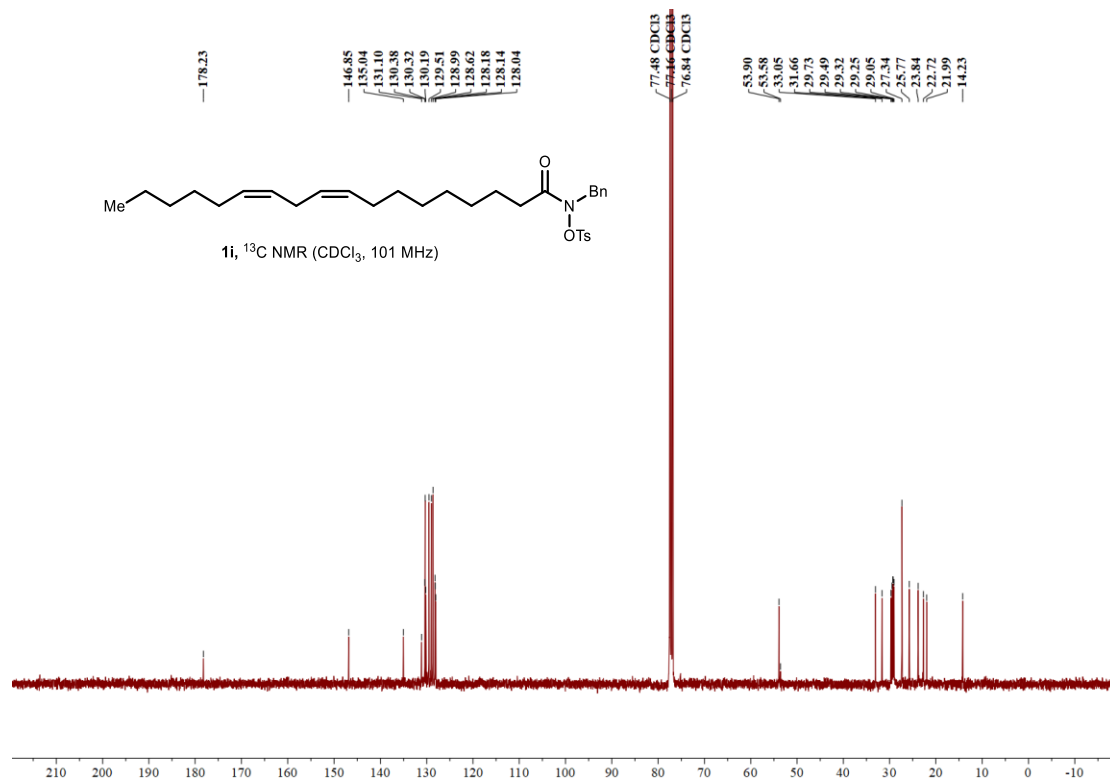

Figure S24.  $^{13}\text{C}$  NMR of **1i** ( $\text{CDCl}_3$ , 101 MHz)

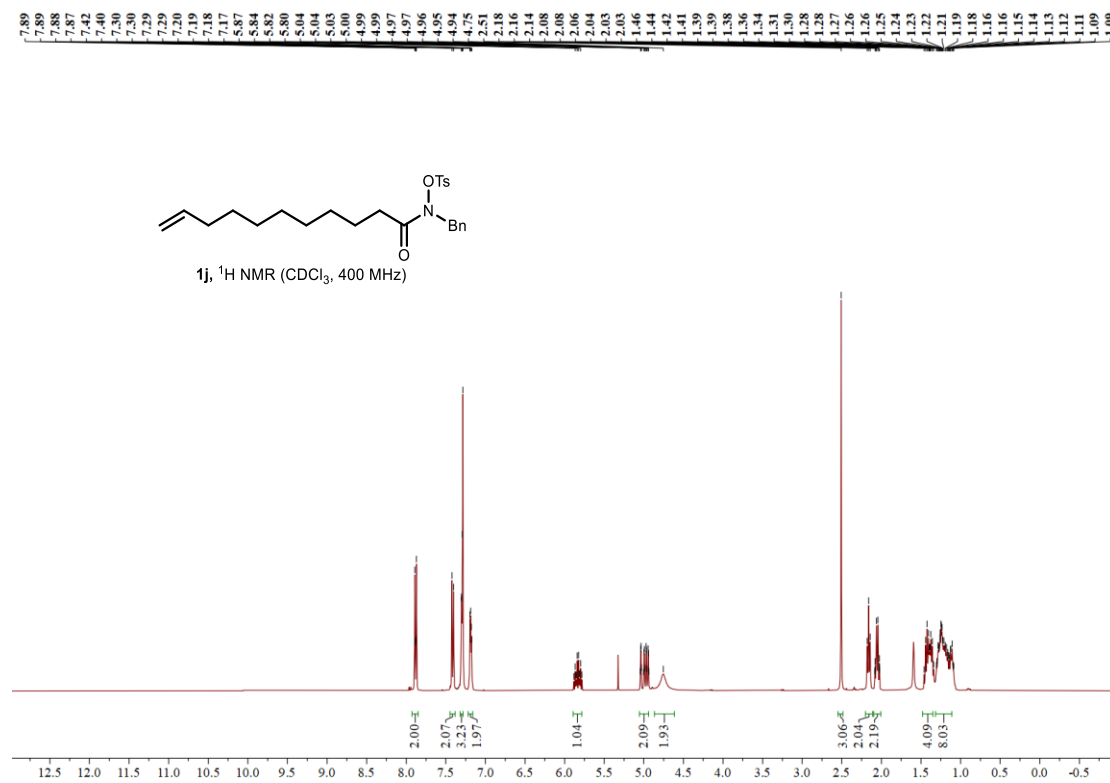

Figure S25.  $^1\text{H}$  NMR of **1j** ( $\text{CDCl}_3$ , 400 MHz)



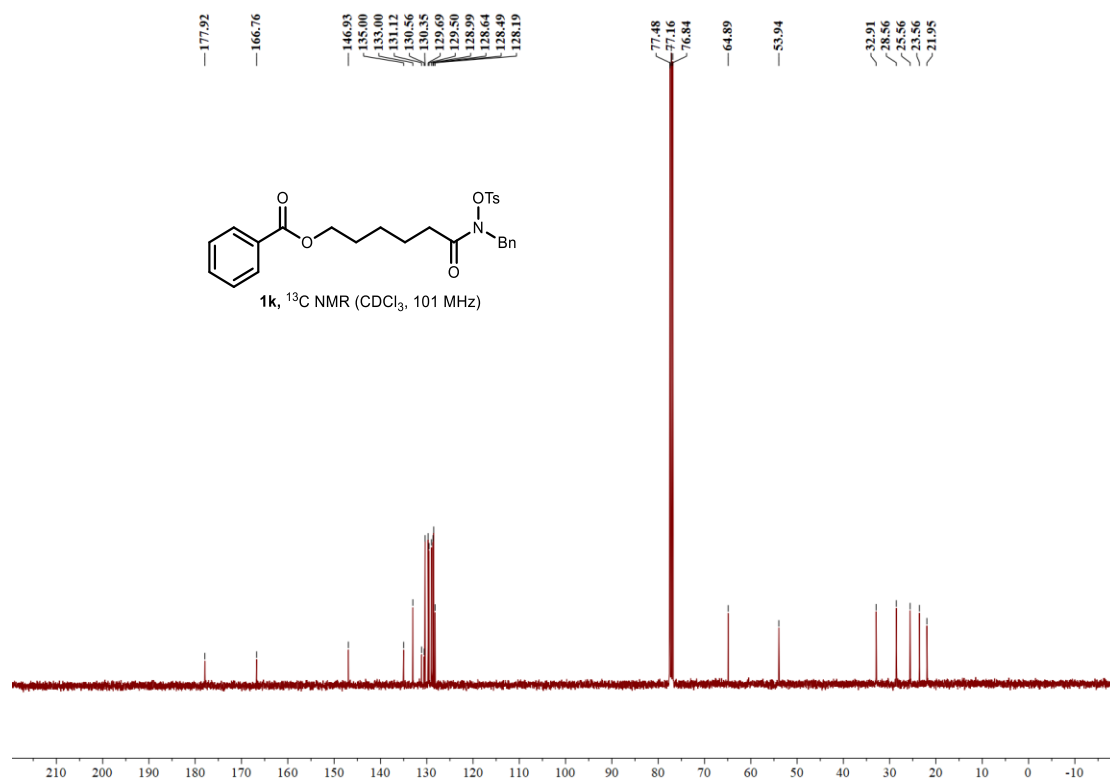

**Figure S28.**  $^{13}\text{C}$  NMR of **1k** ( $\text{CDCl}_3$ , 101 MHz)

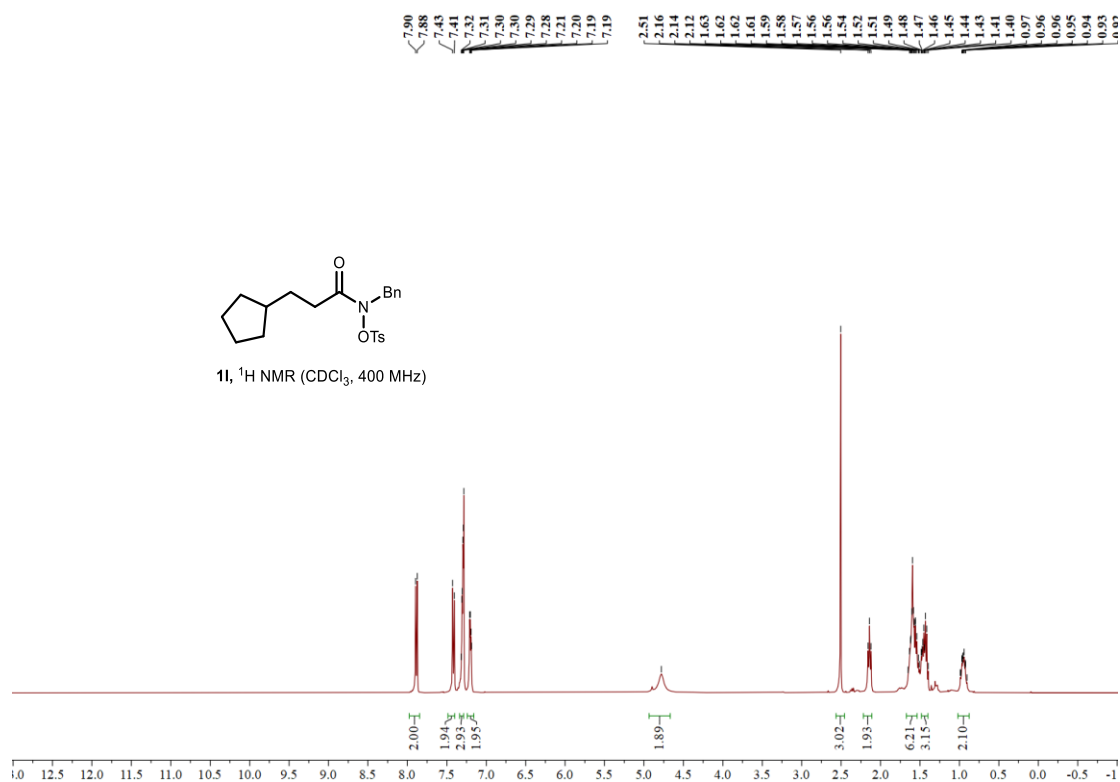

**Figure S29.**  $^1\text{H}$  NMR of **1l** ( $\text{CDCl}_3$ , 400 MHz)

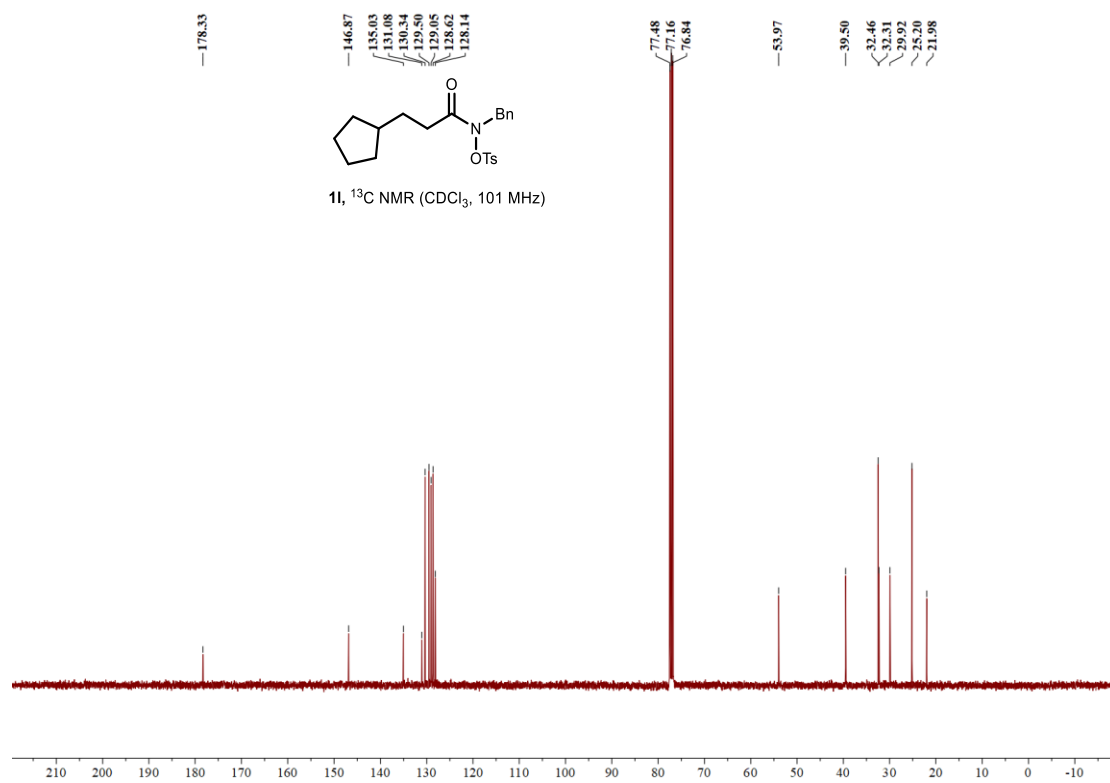

**Figure S30.**  $^{13}\text{C}$  NMR of **1l** ( $\text{CDCl}_3$ , 101 MHz)

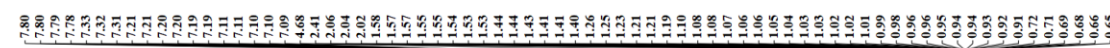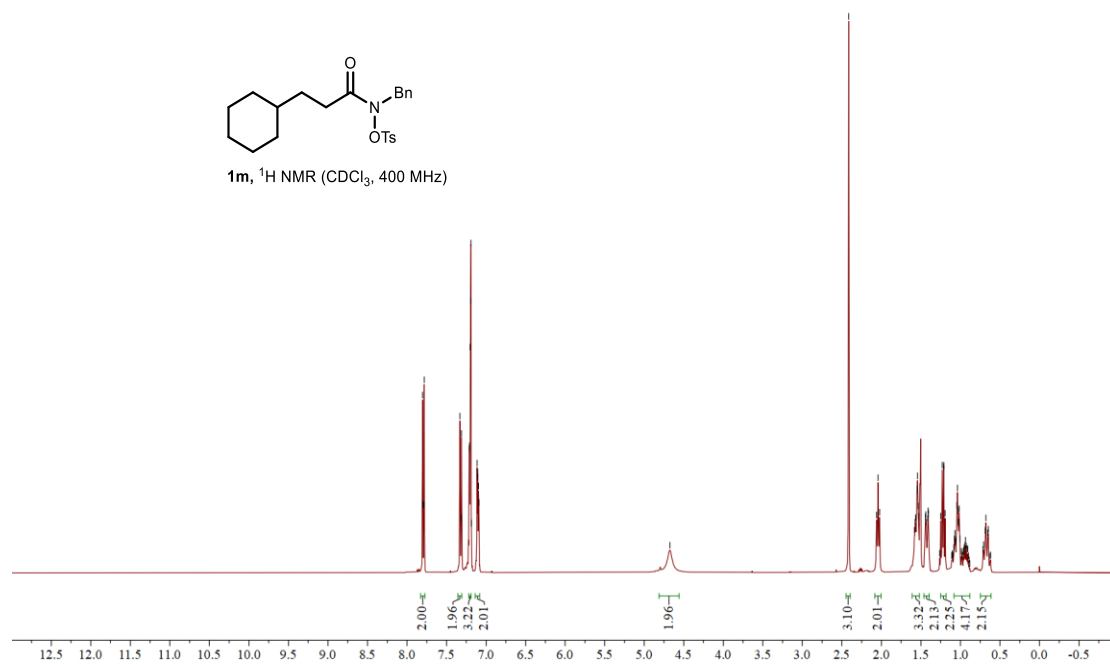

**Figure S31.**  $^1\text{H}$  NMR of **1m** ( $\text{CDCl}_3$ , 400 MHz)

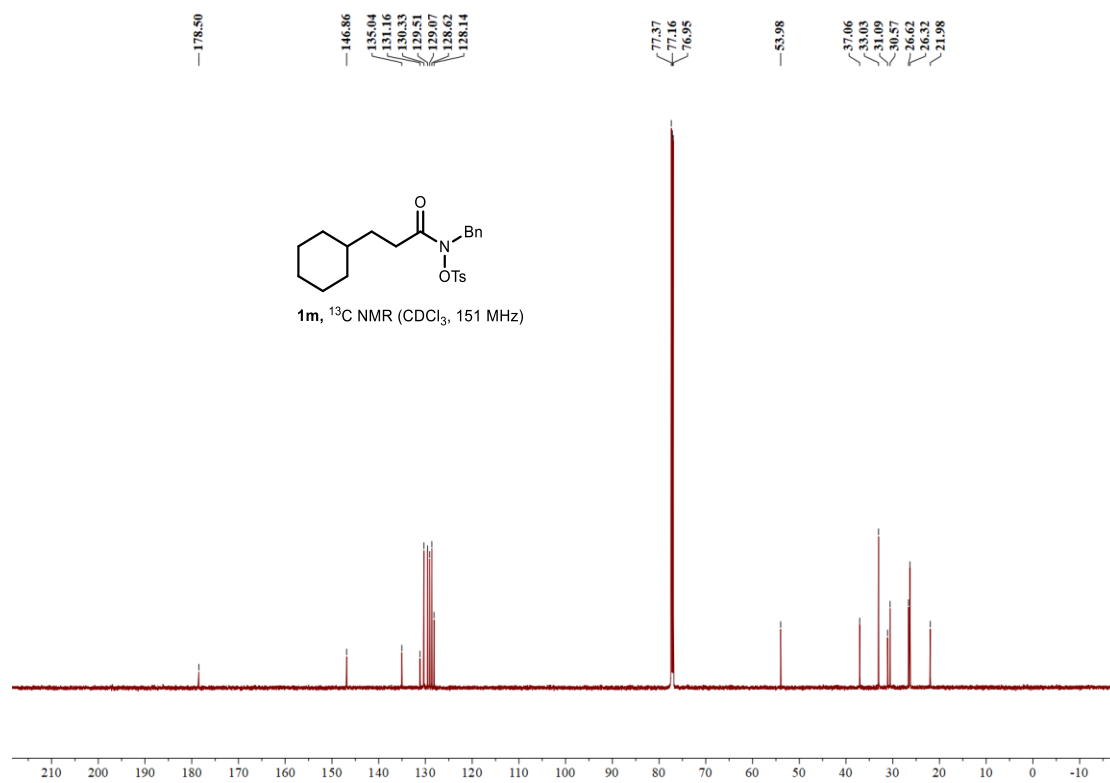

**Figure S32.**  $^{13}\text{C}$  NMR of **1m** ( $\text{CDCl}_3$ , 151 MHz)

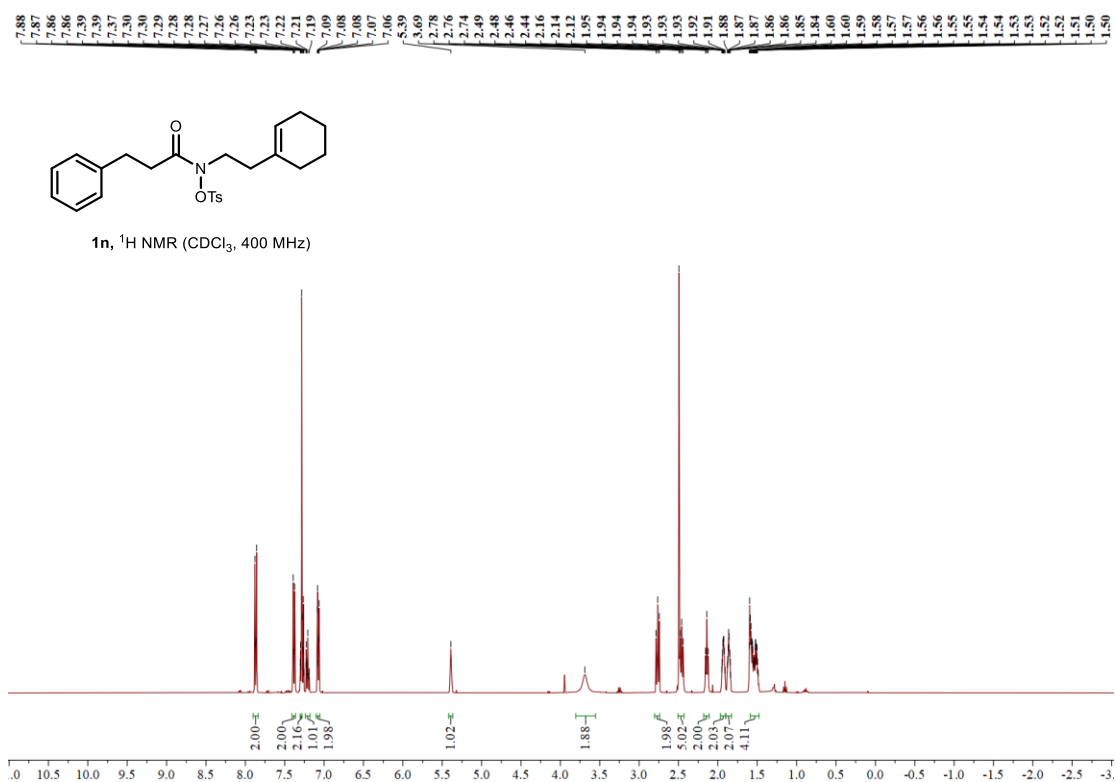

**Figure S33.**  $^1\text{H}$  NMR of **1n** ( $\text{CDCl}_3$ , 400 MHz)

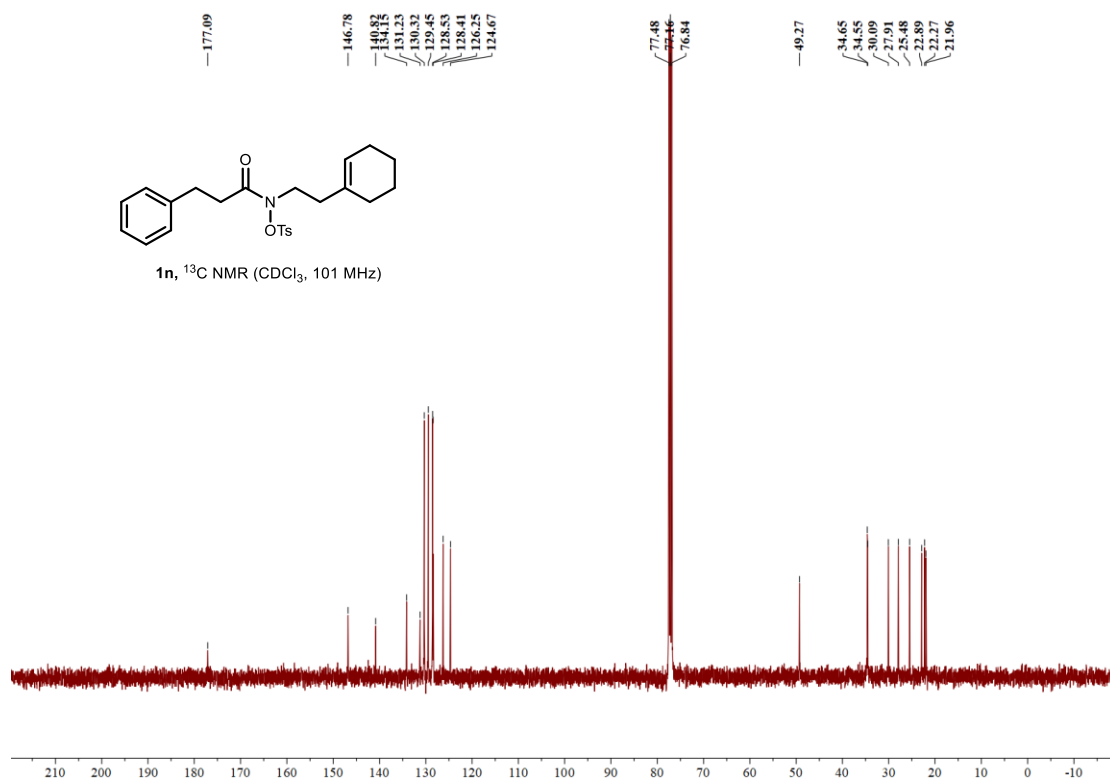

**Figure S34.**  $^{13}\text{C}$  NMR of **1n** ( $\text{CDCl}_3$ , 101 MHz)

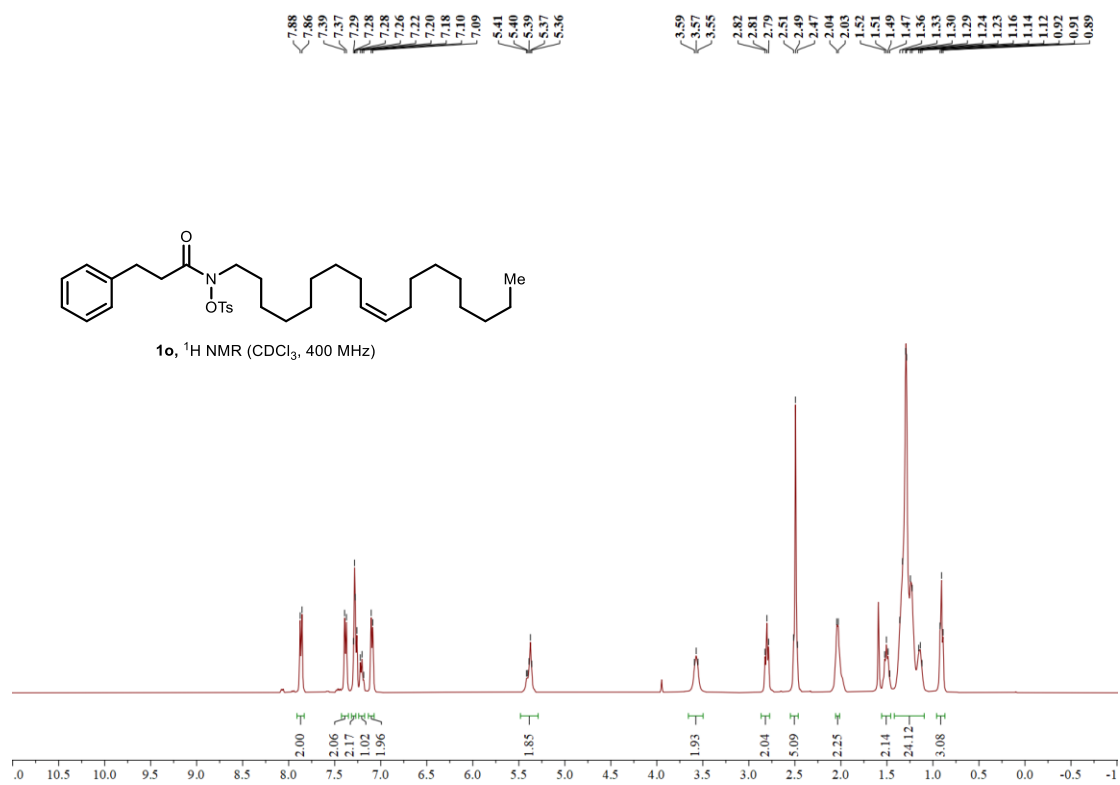

**Figure S35.**  $^1\text{H}$  NMR of **1o** ( $\text{CDCl}_3$ , 400 MHz)

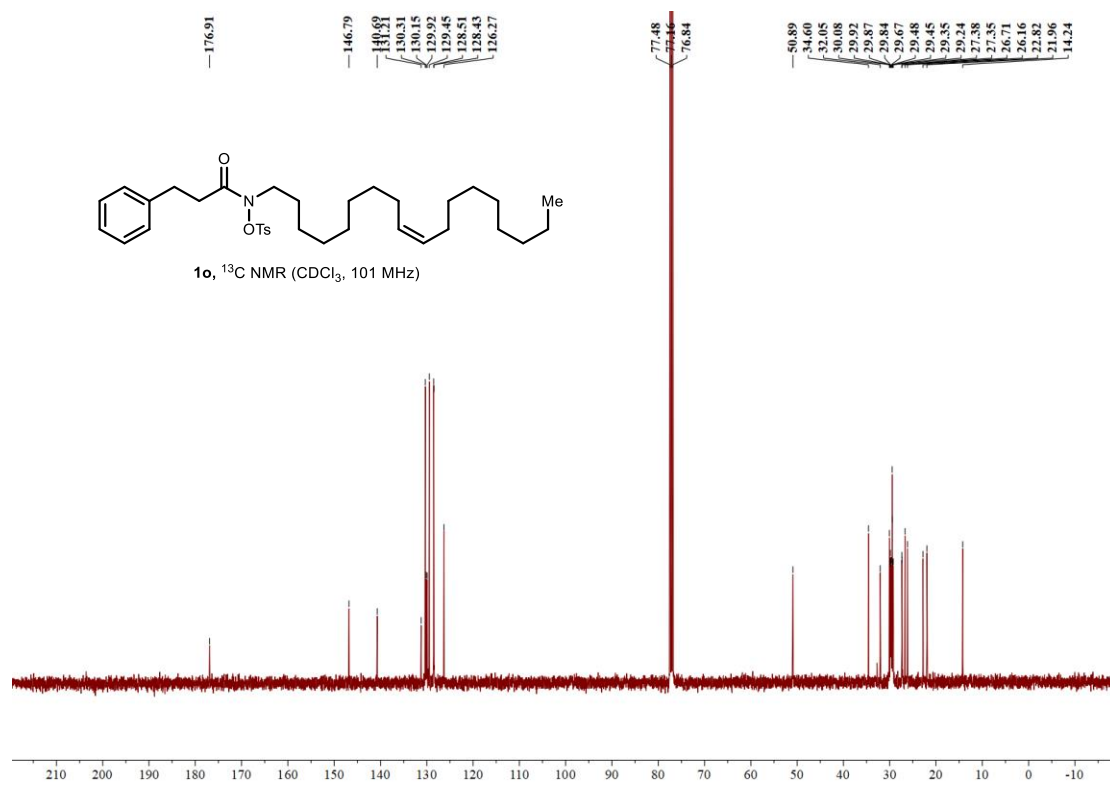

**Figure S36.**  $^{13}\text{C}$  NMR of **1o** (CDCl<sub>3</sub>, 101 MHz)

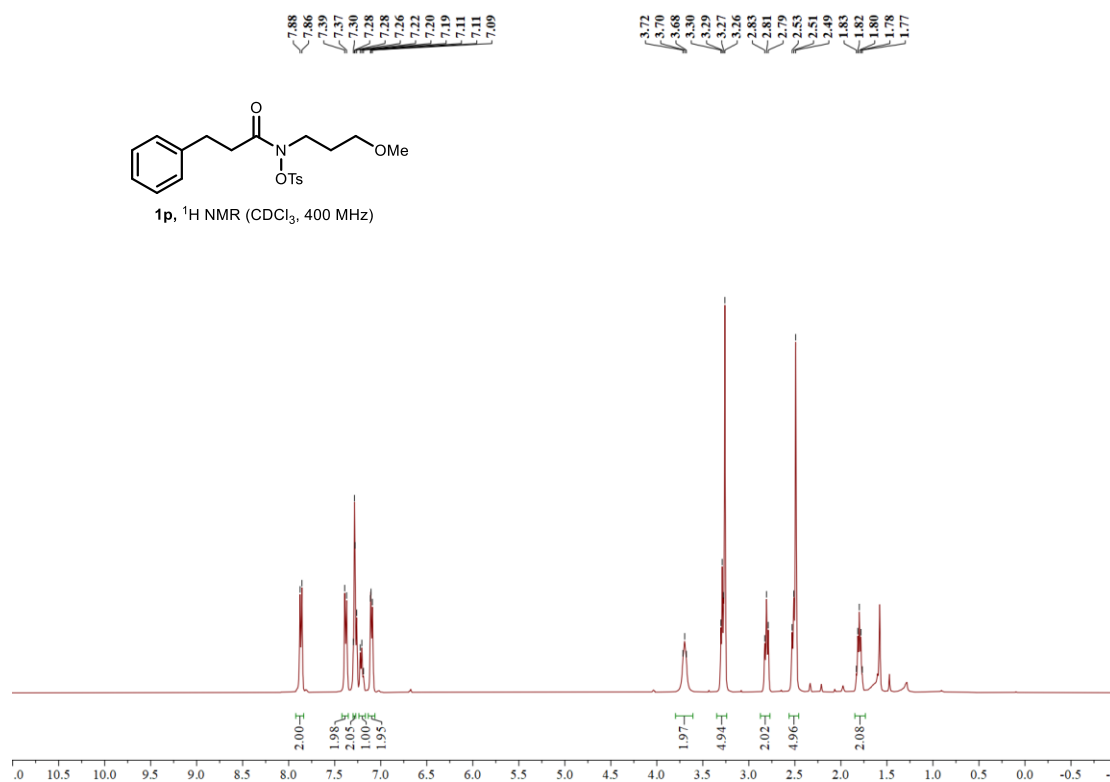

**Figure S37.**  $^1\text{H}$  NMR of **1p** (CDCl<sub>3</sub>, 400 MHz)

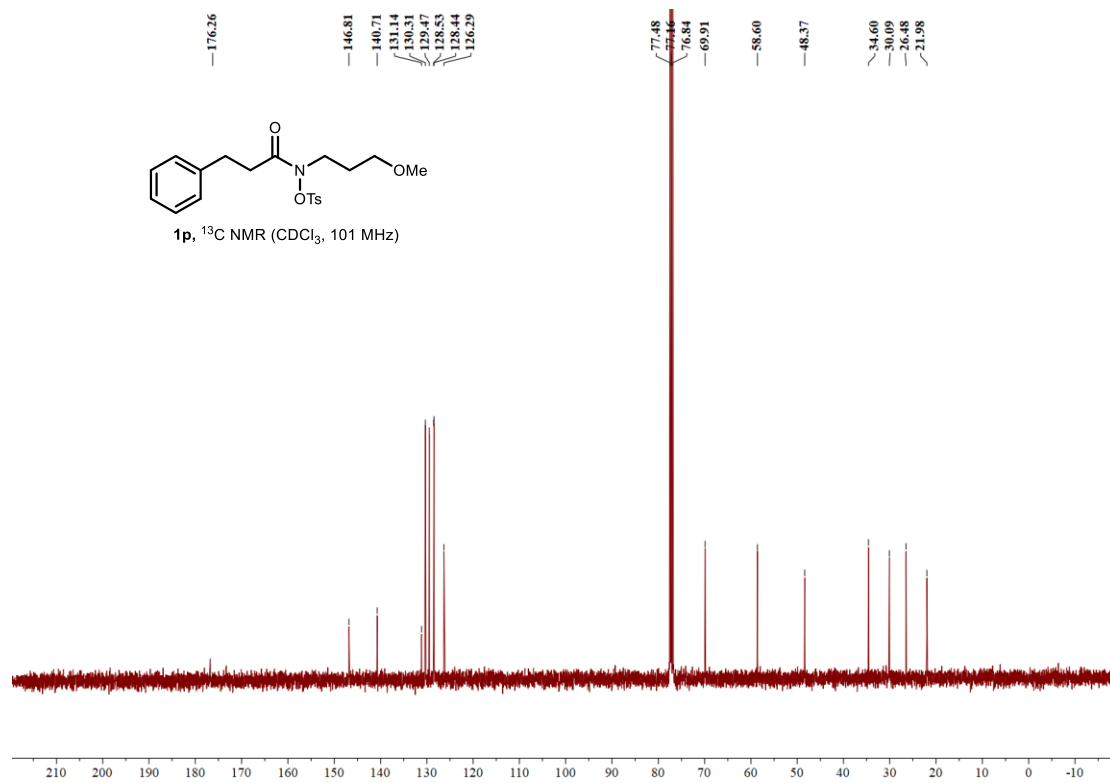

**Figure S38.**  $^{13}\text{C}$  NMR of **1p** ( $\text{CDCl}_3$ , 101 MHz)

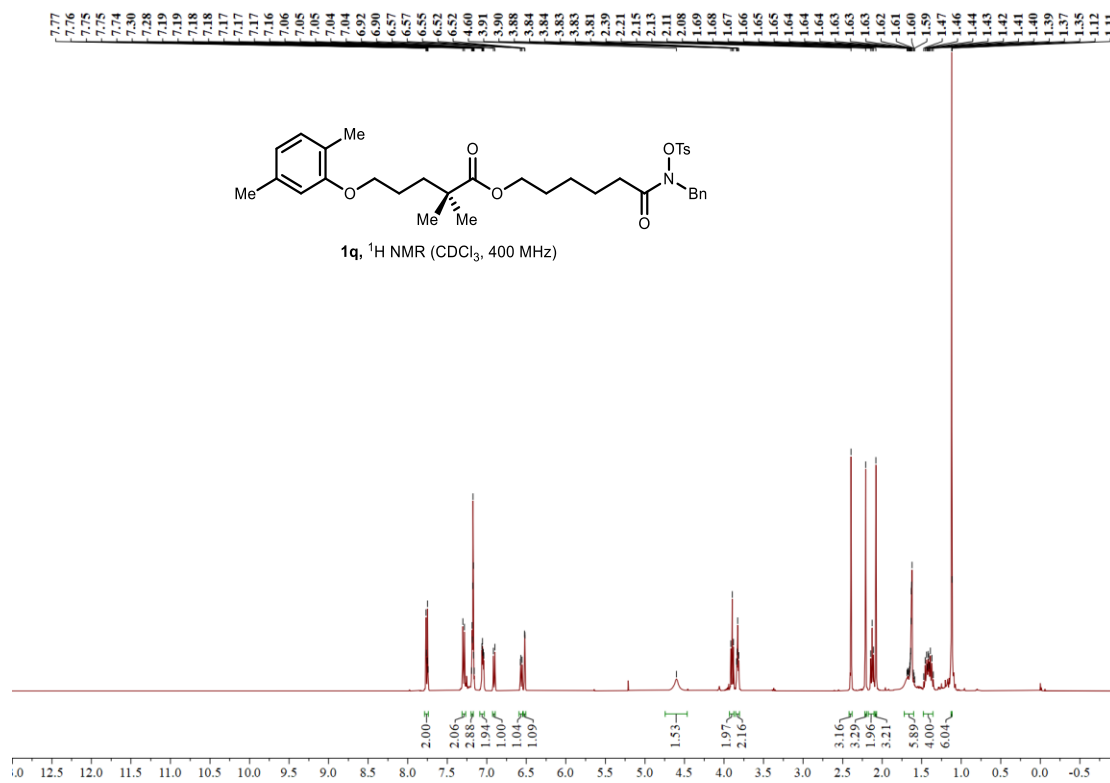

**Figure S39.**  $^1\text{H}$  NMR of **1q** ( $\text{CDCl}_3$ , 400 MHz)



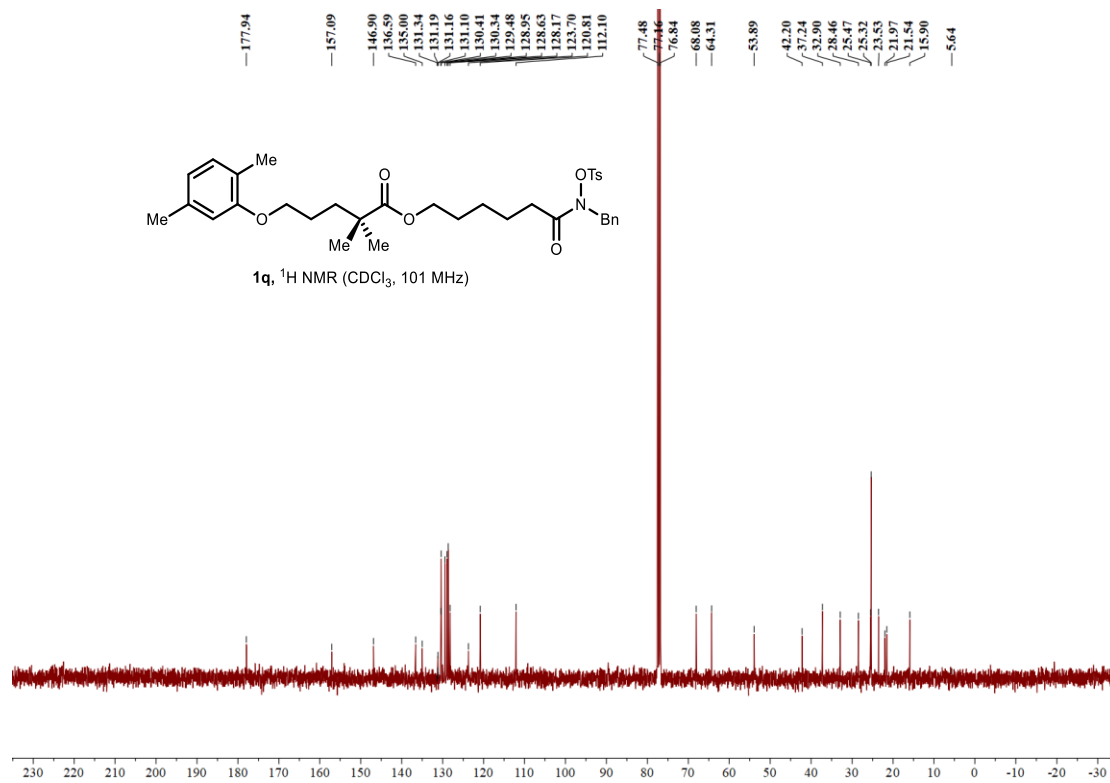

**Figure S40.**  $^{13}\text{C}$  NMR of **1q** ( $\text{CDCl}_3$ , 101 MHz)

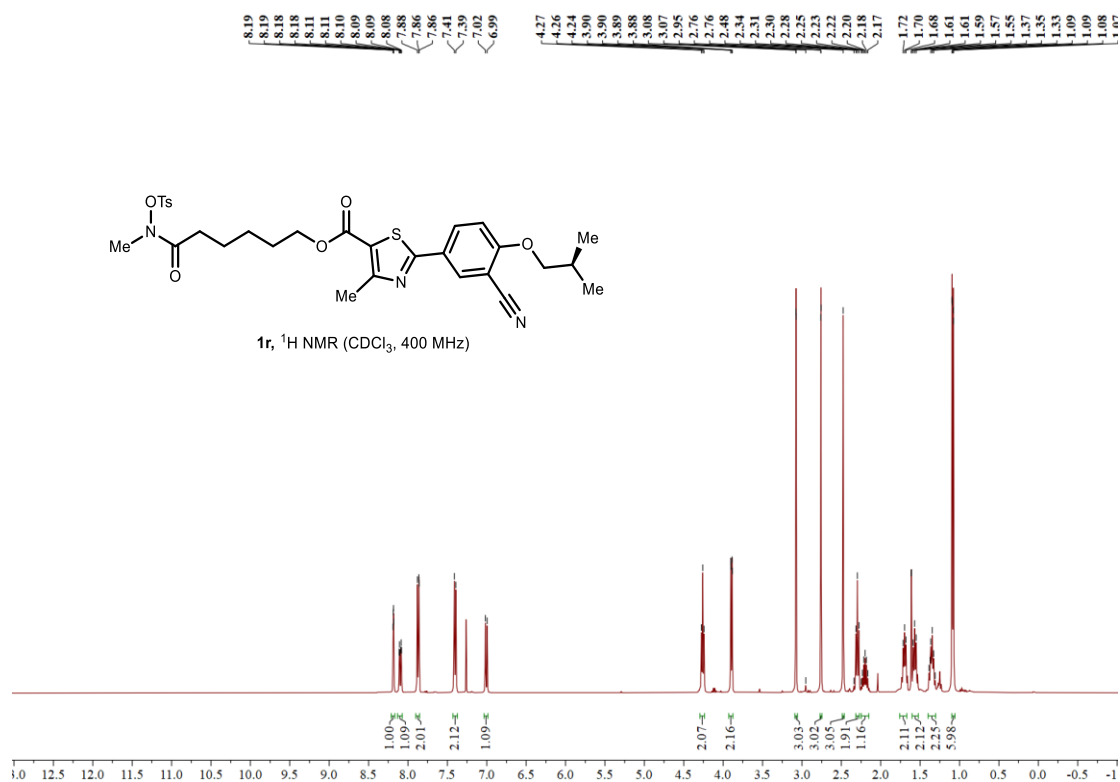

**Figure S41.**  $^1\text{H}$  NMR of **1r** ( $\text{CDCl}_3$ , 400 MHz)

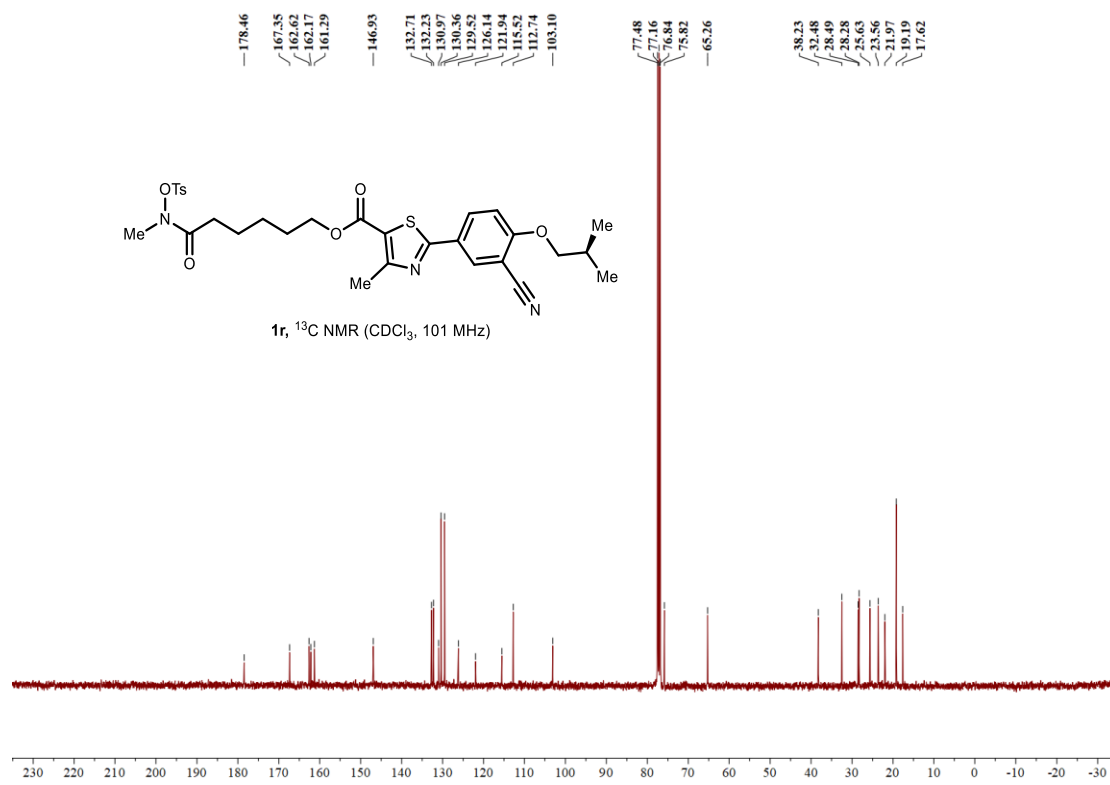

**Figure S42.**  $^{13}\text{C}$  NMR of **1r** ( $\text{CDCl}_3$ , 101 MHz)

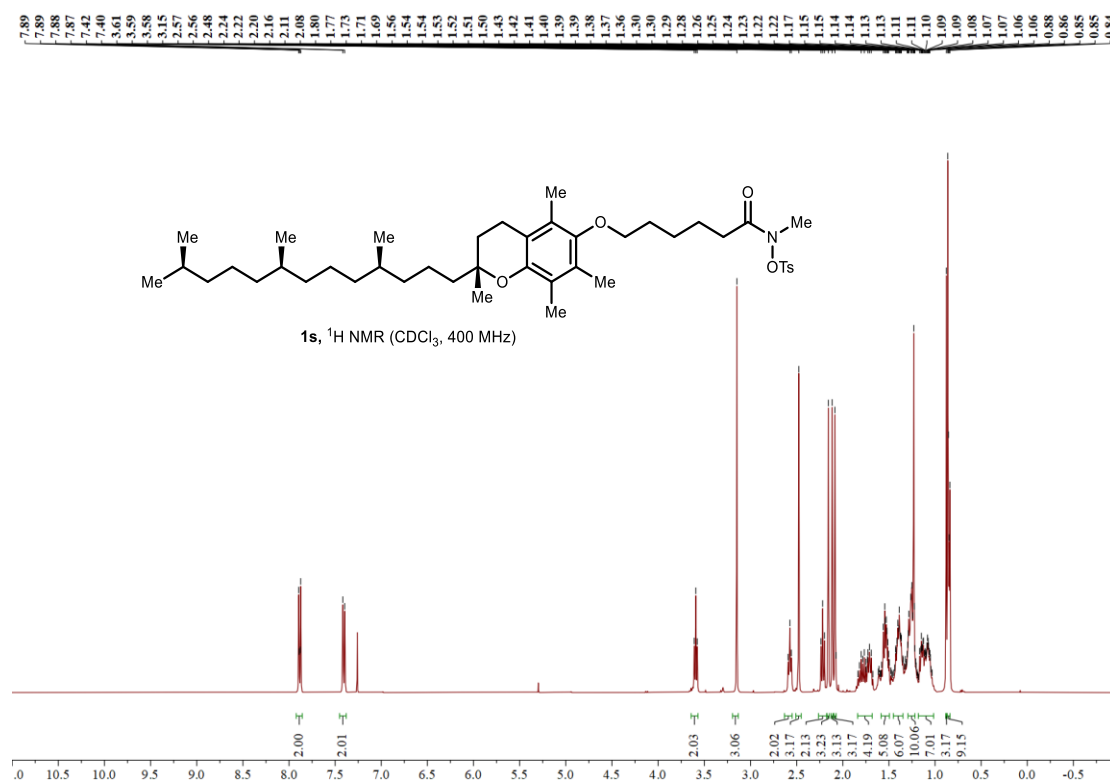

**Figure S43.**  $^1\text{H}$  NMR of **1s** ( $\text{CDCl}_3$ , 400 MHz)

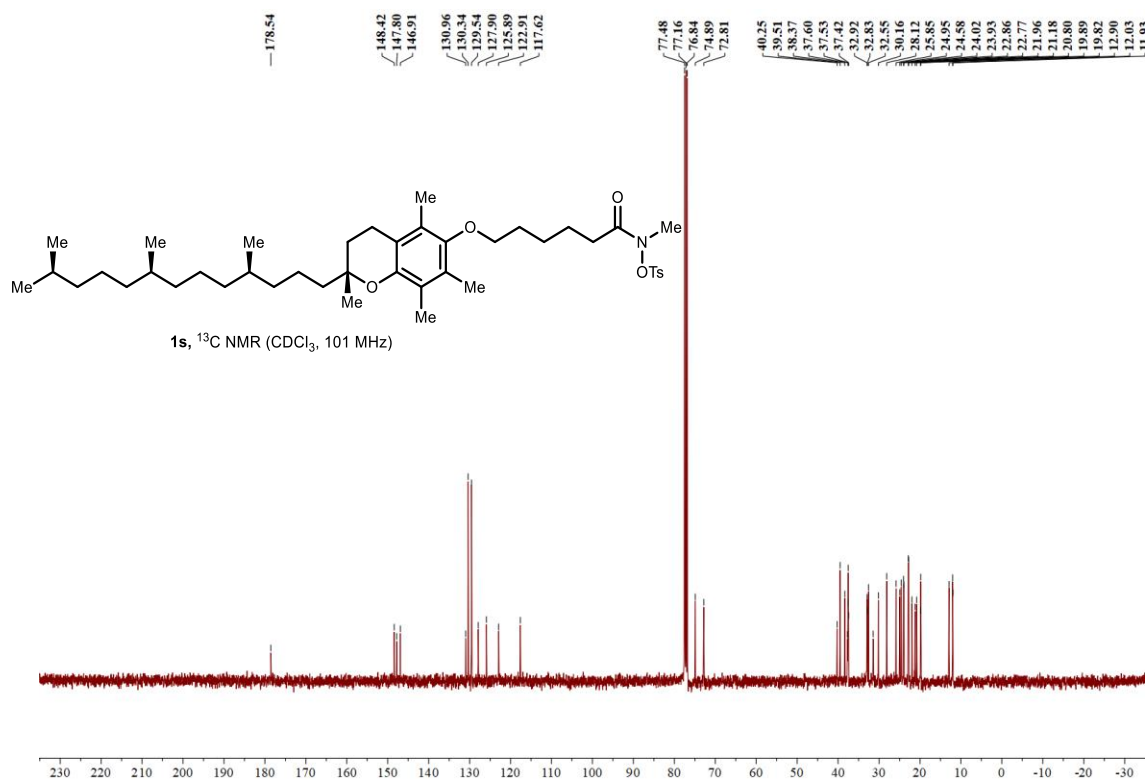

**Figure S44.**  $^{13}\text{C}$  NMR of **1s** ( $\text{CDCl}_3$ , 101 MHz)

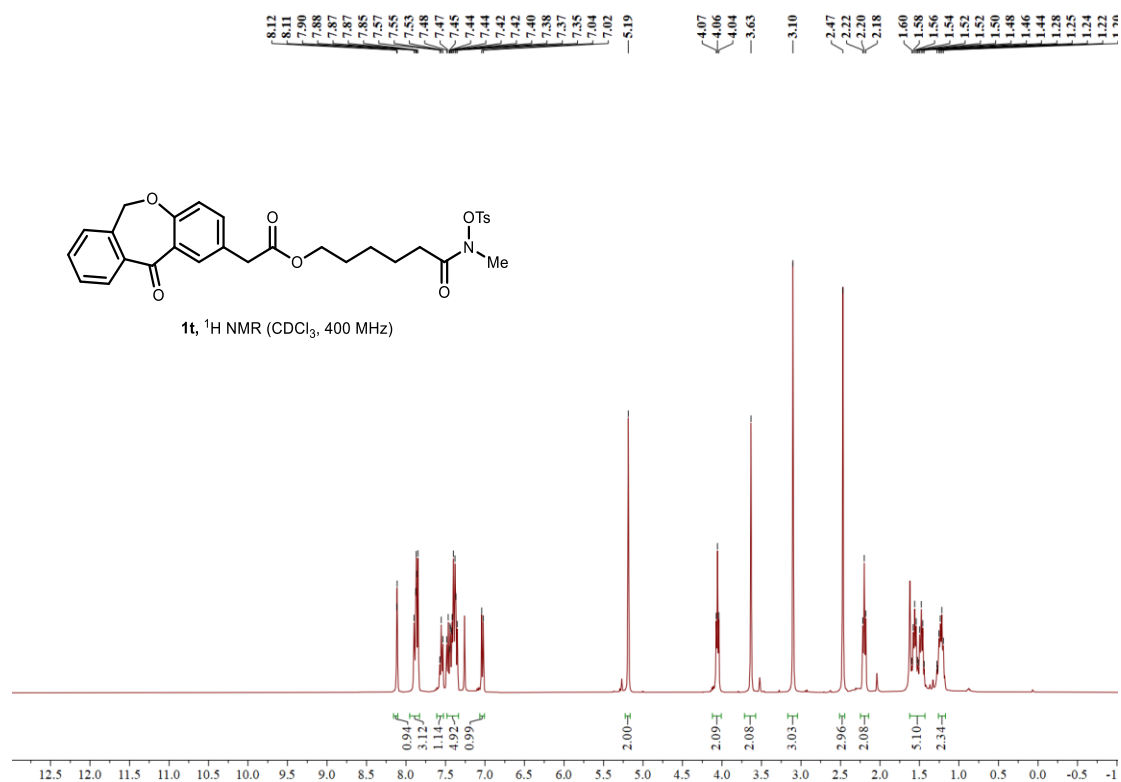

**Figure S45.**  $^1\text{H}$  NMR of **1t** ( $\text{CDCl}_3$ , 400 MHz)

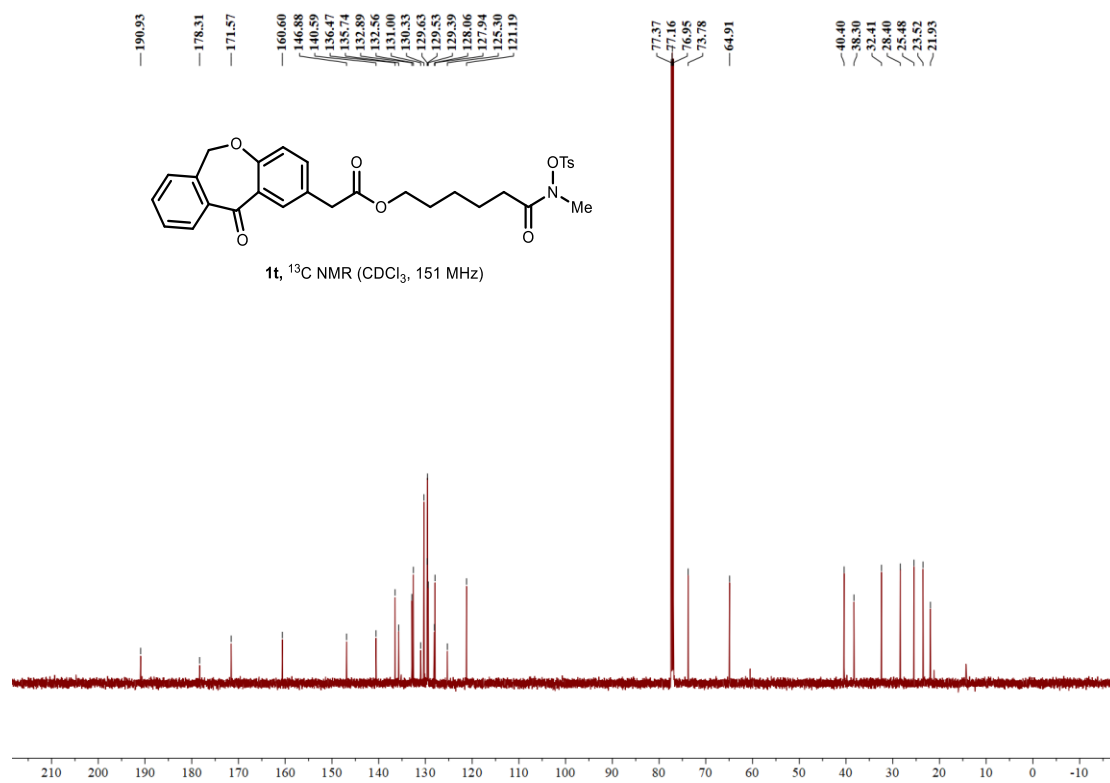

**Figure S46.**  $^{13}\text{C}$  NMR of **1t** ( $\text{CDCl}_3$ , 151 MHz)

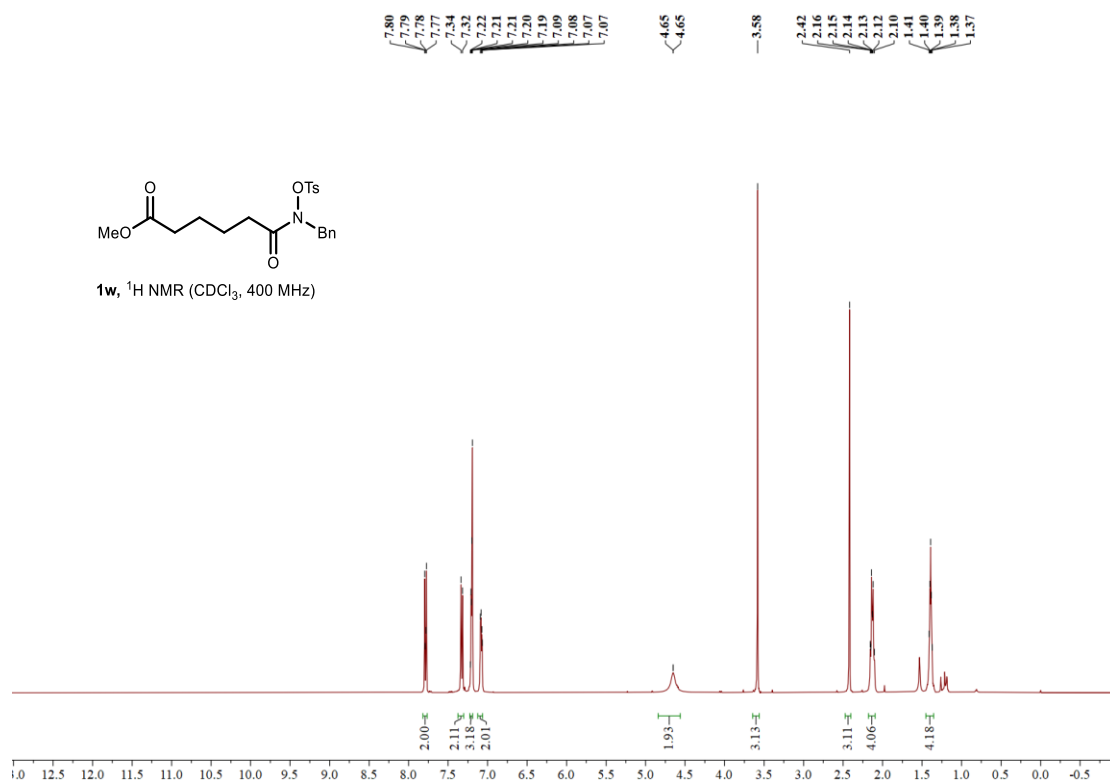

**Figure S47.**  $^1\text{H}$  NMR of **1w** ( $\text{CDCl}_3$ , 400 MHz)

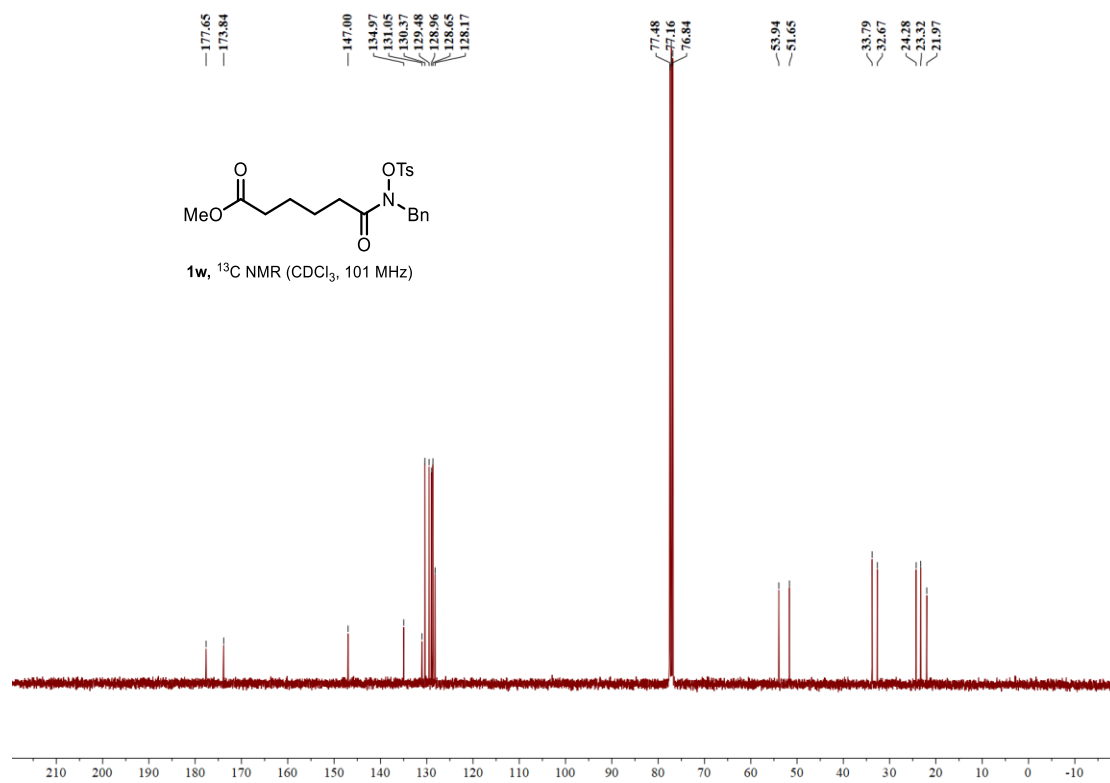

**Figure S48.**  $^{13}\text{C}$  NMR of **1w** ( $\text{CDCl}_3$ , 101 MHz)

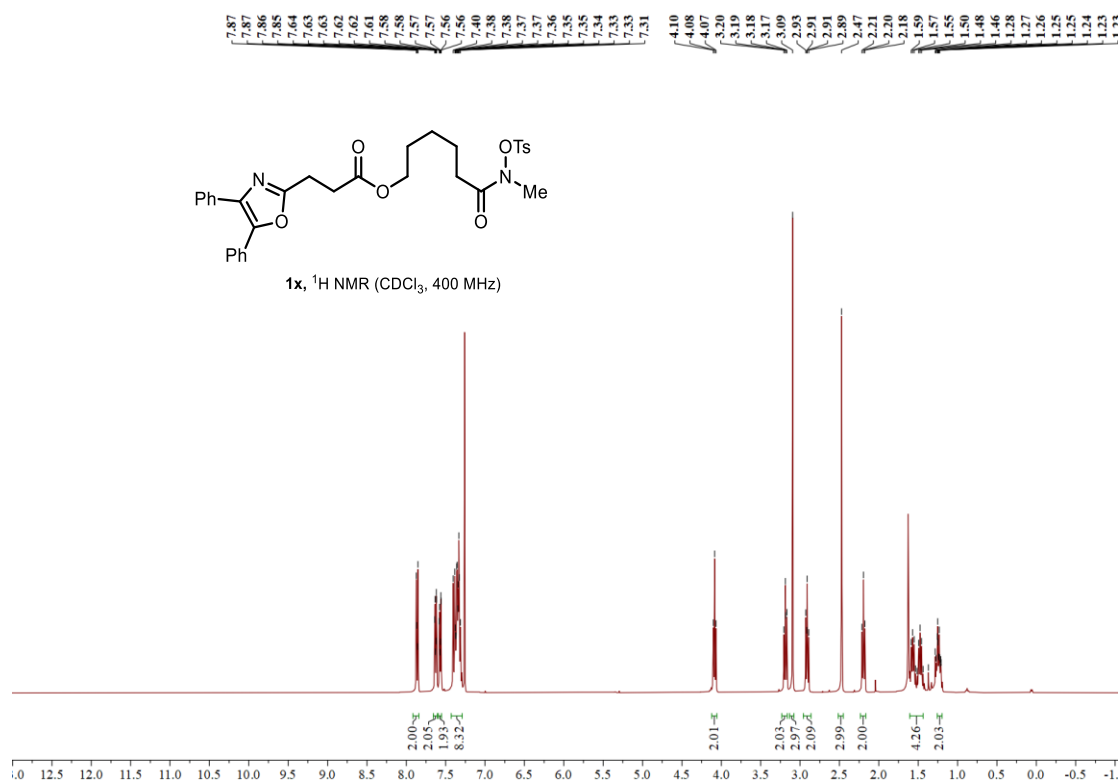

**Figure S49.**  $^1\text{H}$  NMR of **1x** ( $\text{CDCl}_3$ , 400 MHz)

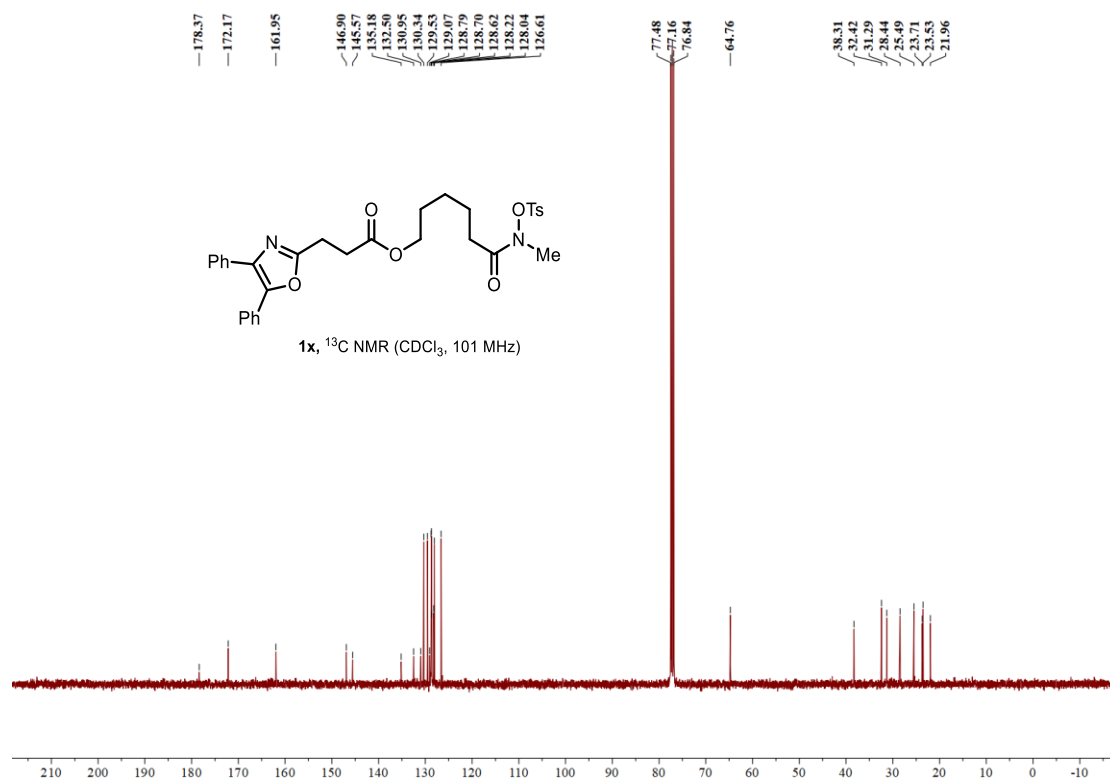

**Figure S50.**  $^{13}\text{C}$  NMR of **1x** ( $\text{CDCl}_3$ , 101 MHz)

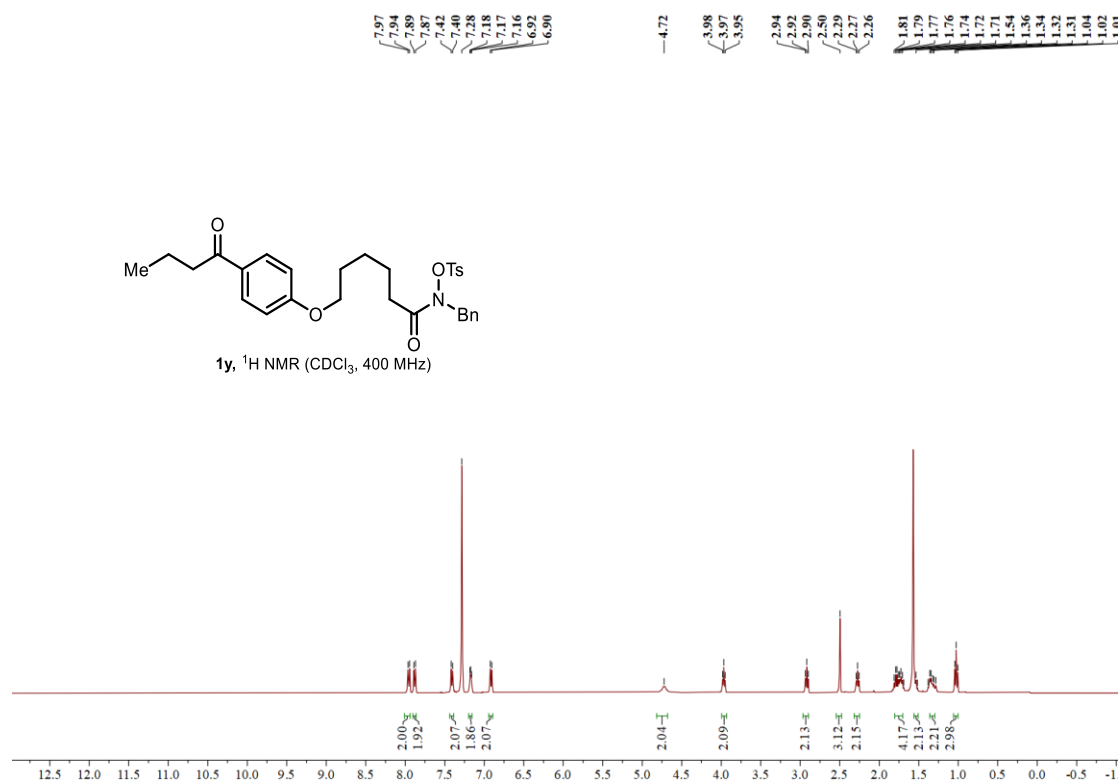

**Figure S51.**  $^1\text{H}$  NMR of **1y** ( $\text{CDCl}_3$ , 400 MHz)

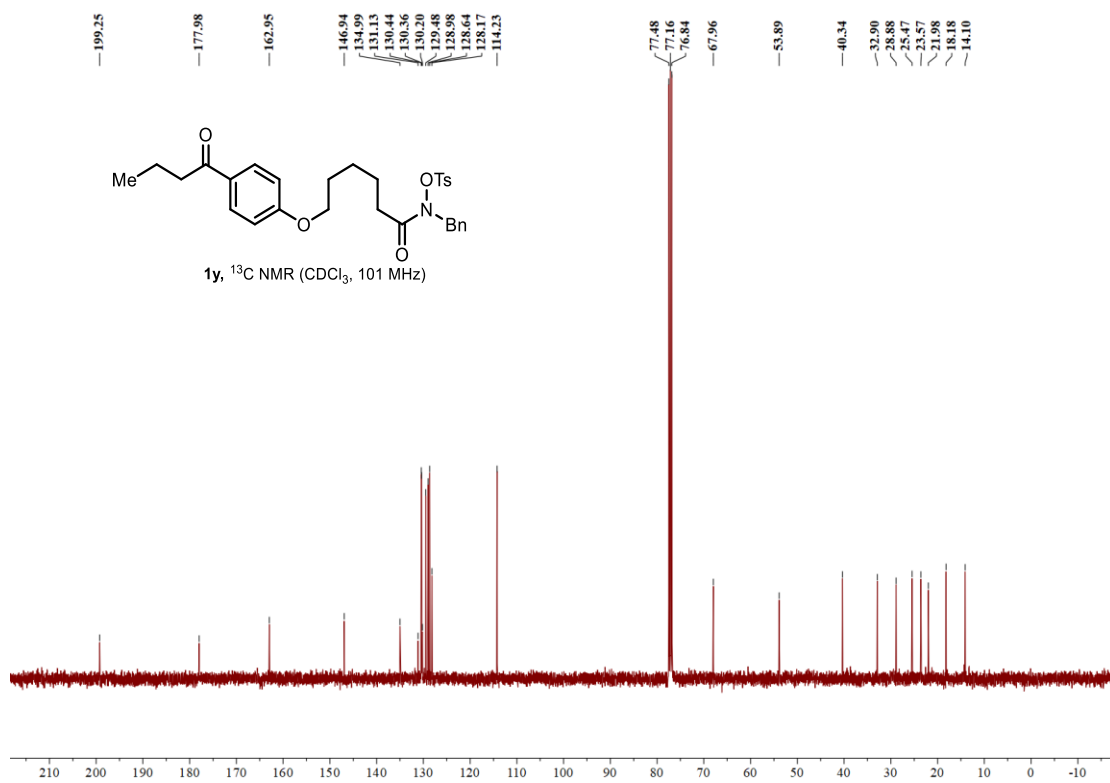

**Figure S52.**  $^{13}\text{C}$  NMR of **1y** ( $\text{CDCl}_3$ , 101 MHz)

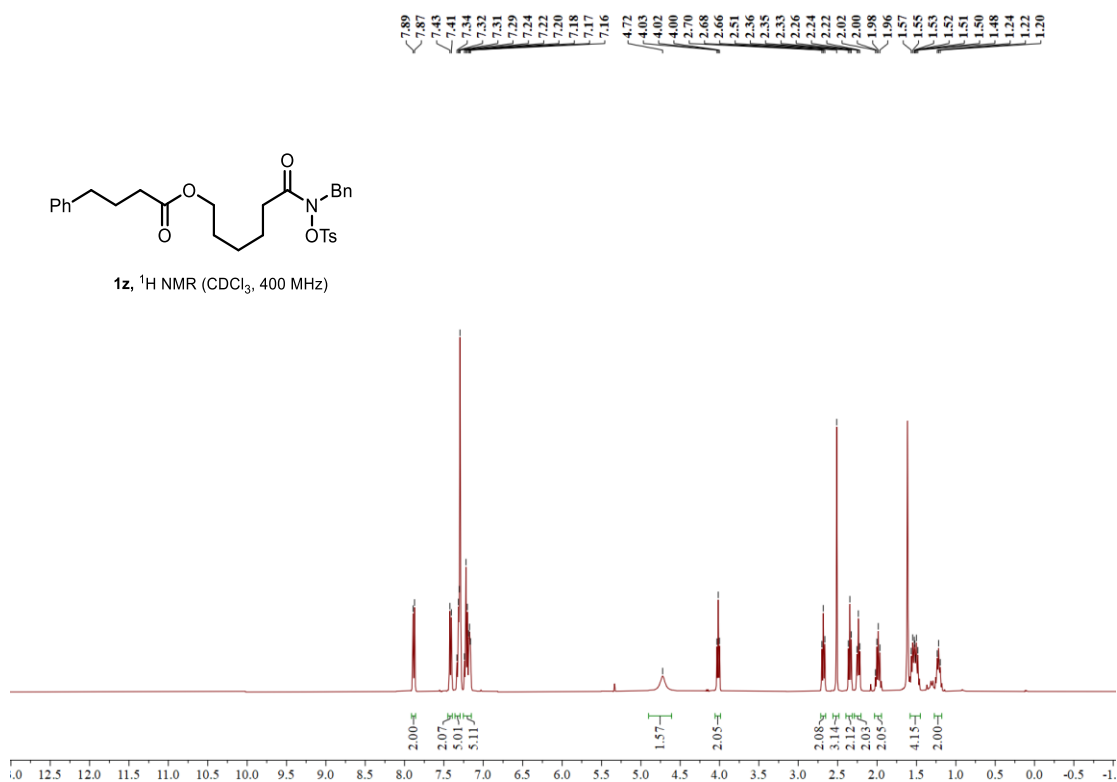

**Figure S53.**  $^1\text{H}$  NMR of **1z** ( $\text{CDCl}_3$ , 400 MHz)

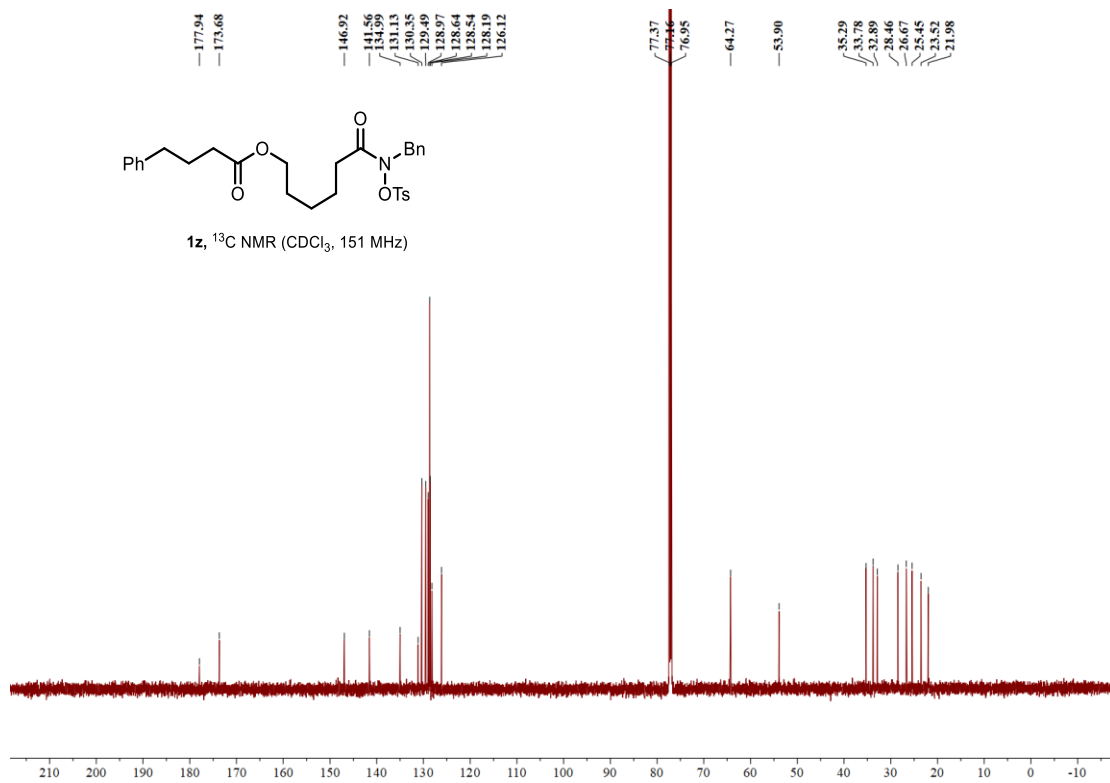

**Figure S54.**  $^{13}\text{C}$  NMR of **1z** ( $\text{CDCl}_3$ , 151 MHz)

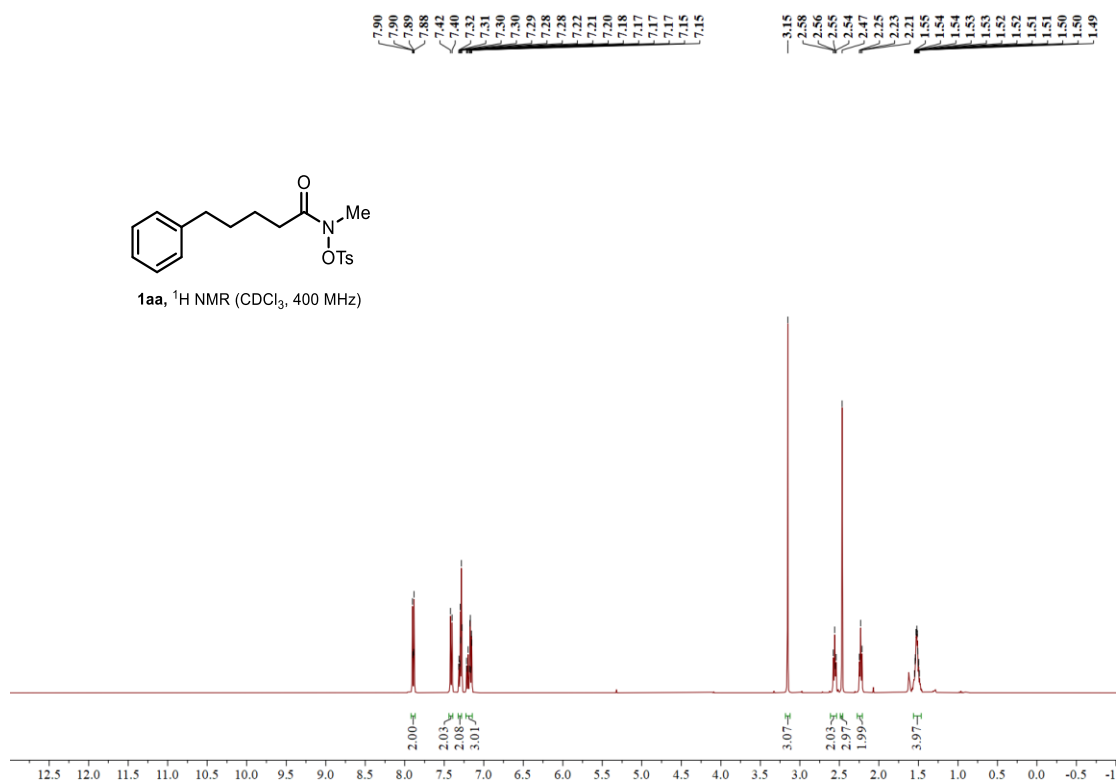

**Figure S55.**  $^1\text{H}$  NMR of **1aa** ( $\text{CDCl}_3$ , 400 MHz)



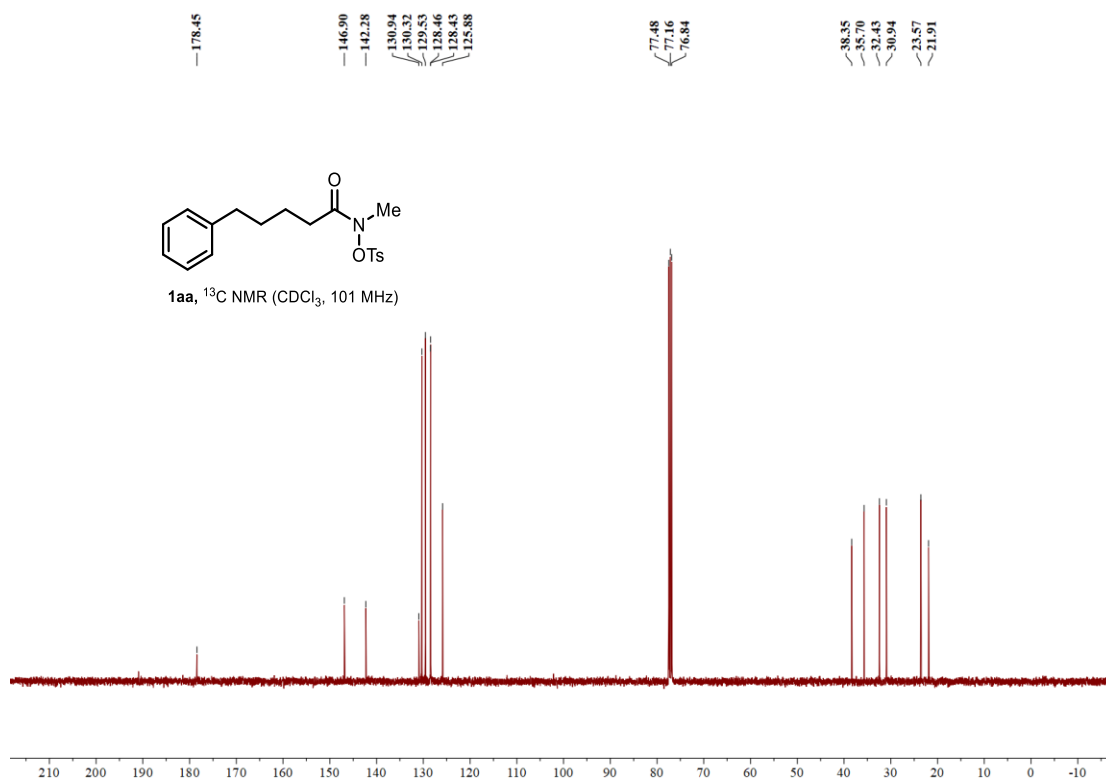

**Figure S56.**  $^{13}\text{C}$  NMR of **1aa** ( $\text{CDCl}_3$ , 101 MHz)

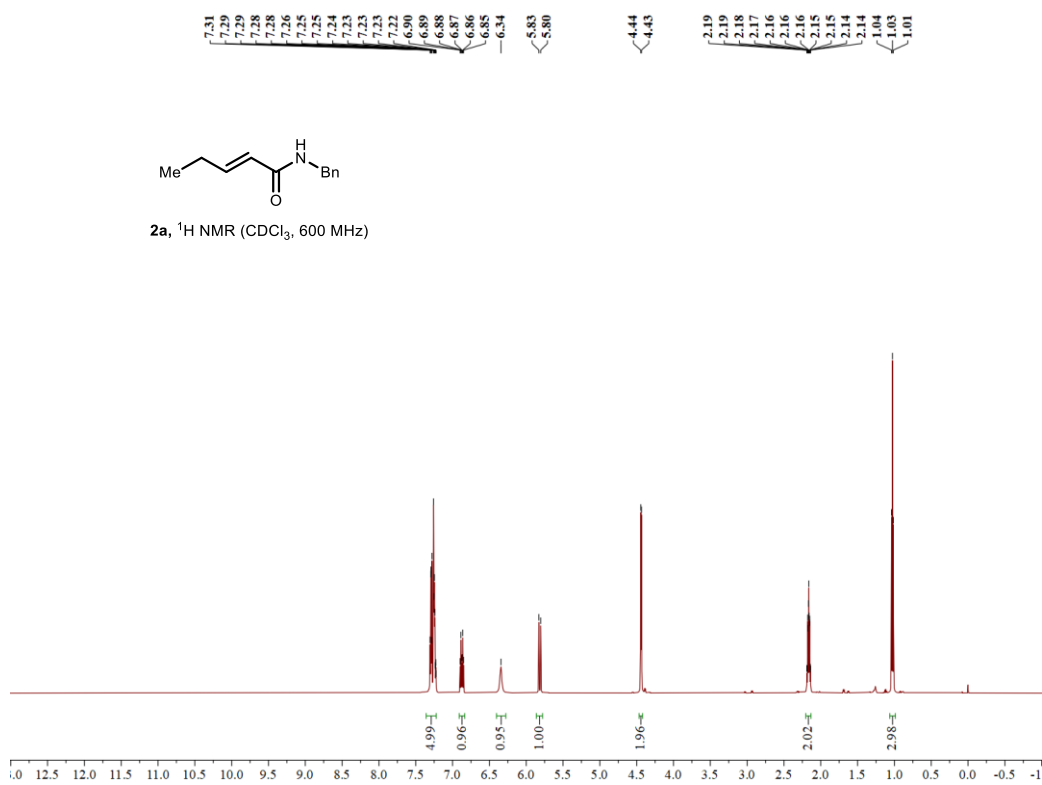

**Figure S57.**  $^1\text{H}$  NMR of **2a** ( $\text{CDCl}_3$ , 600 MHz)

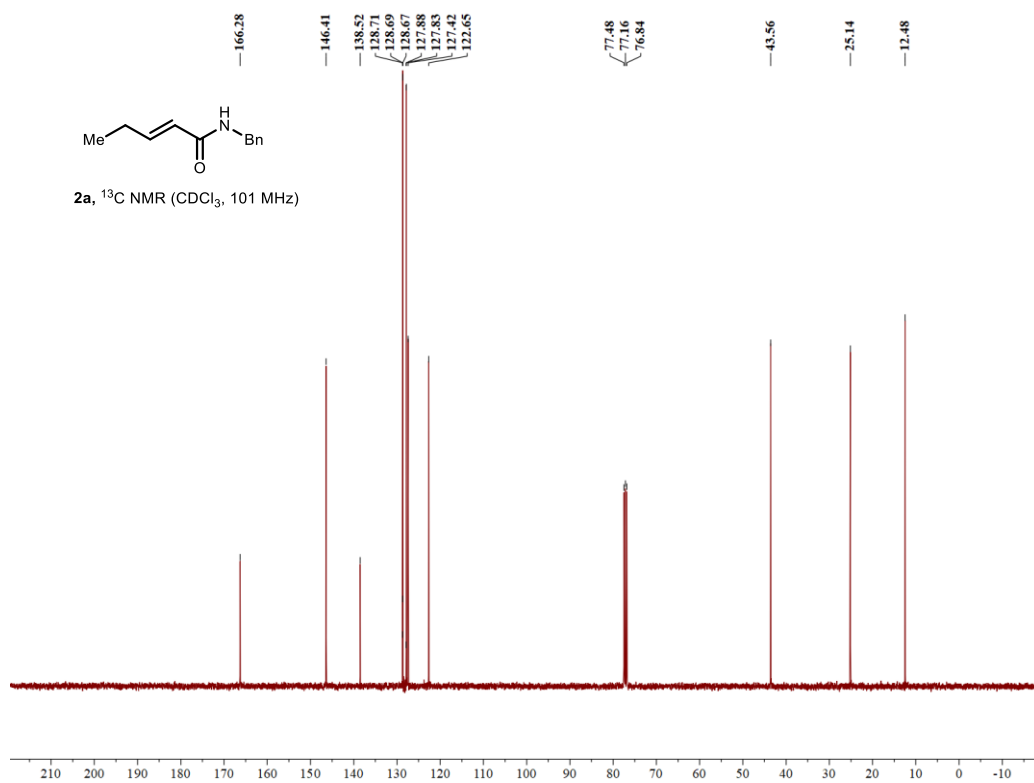

**Figure S58.**  $^{13}\text{C}$  NMR of **2a** ( $\text{CDCl}_3$ , 101 MHz)

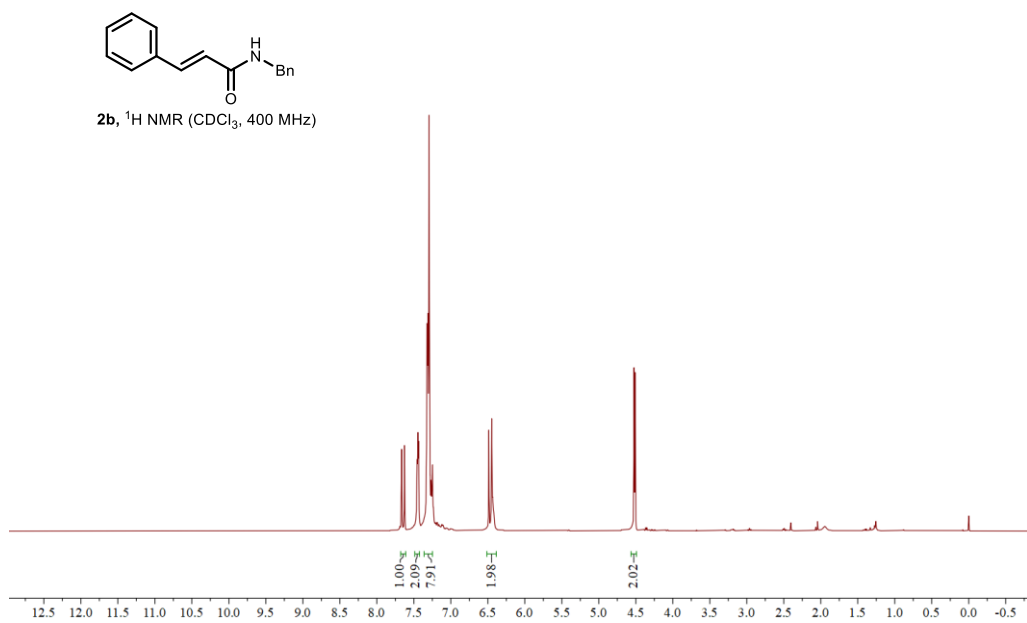

**Figure S59.**  $^1\text{H}$  NMR of **2b** ( $\text{CDCl}_3$ , 400 MHz)

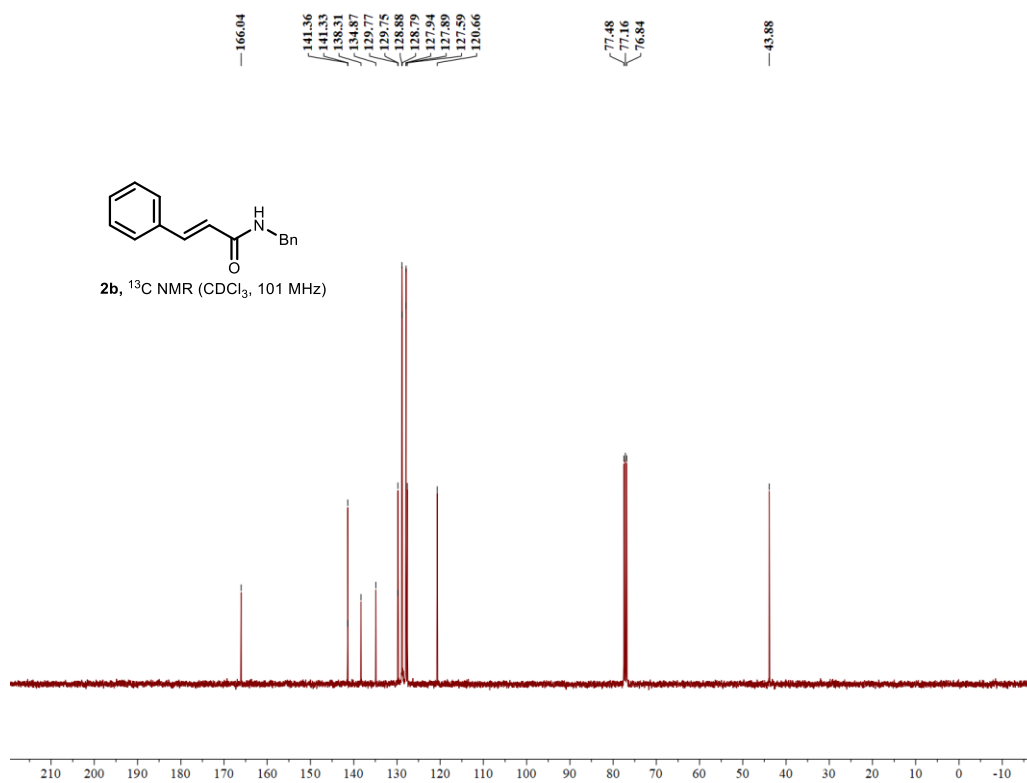

**Figure S60.**  $^{13}\text{C}$  NMR of **2b** ( $\text{CDCl}_3$ , 101 MHz)

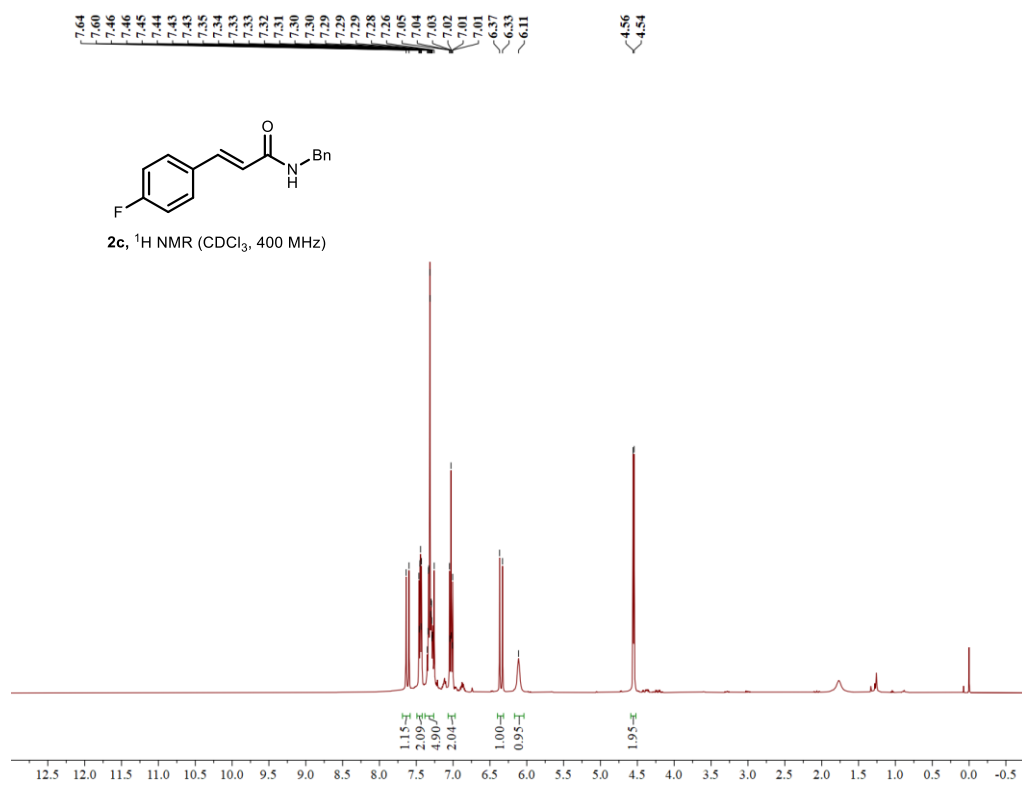

**Figure S61.**  $^1\text{H}$  NMR of **2c** ( $\text{CDCl}_3$ , 400 MHz)

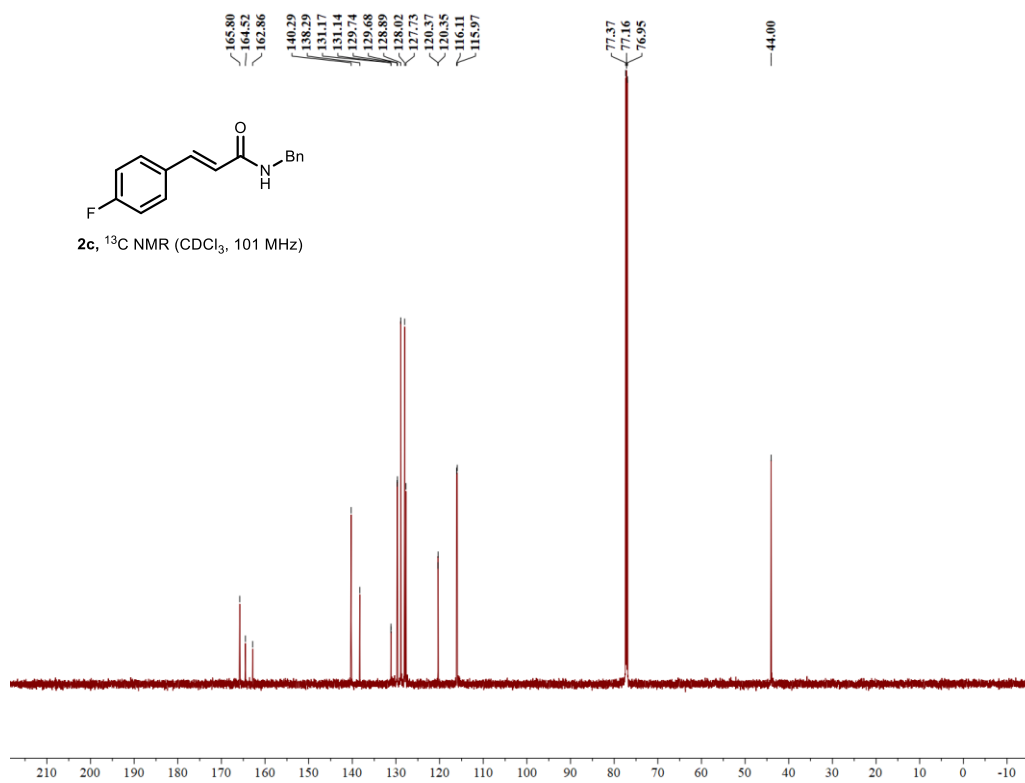

**Figure S62.**  $^{13}\text{C}$  NMR of **2c** ( $\text{CDCl}_3$ , 101 MHz)

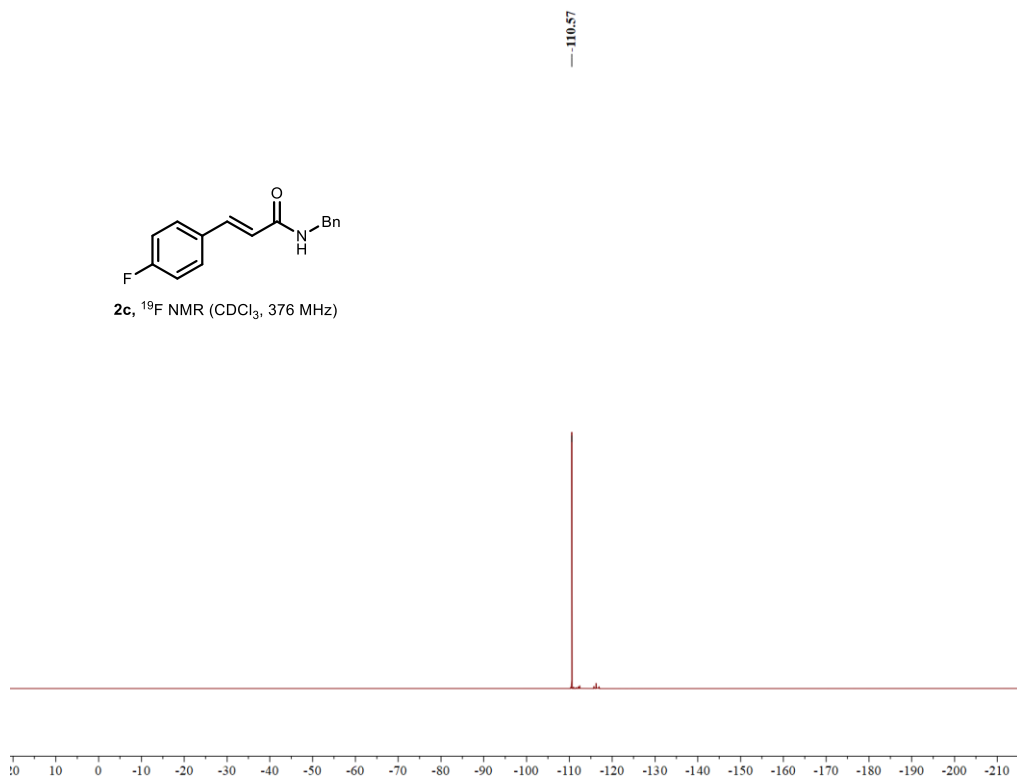

**Figure S63.**  $^{19}\text{F}$  NMR of **2c** ( $\text{CDCl}_3$ , 376 MHz)

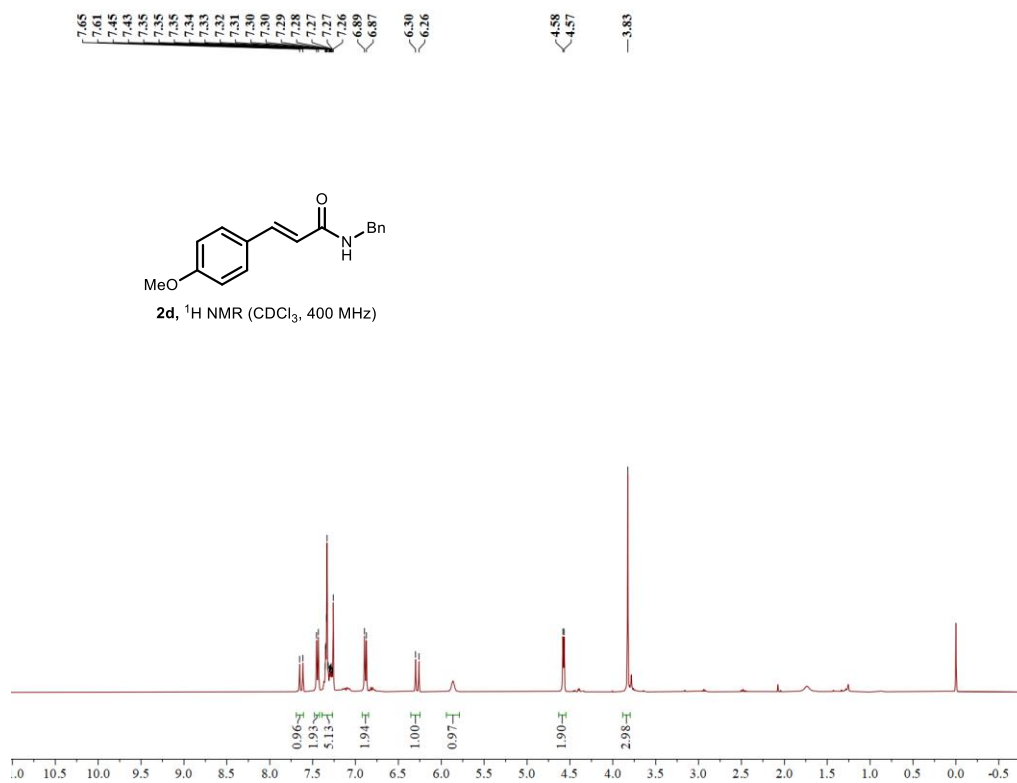

Figure S64.  $^1\text{H NMR}$  of **2d** ( $\text{CDCl}_3$ , 400 MHz)

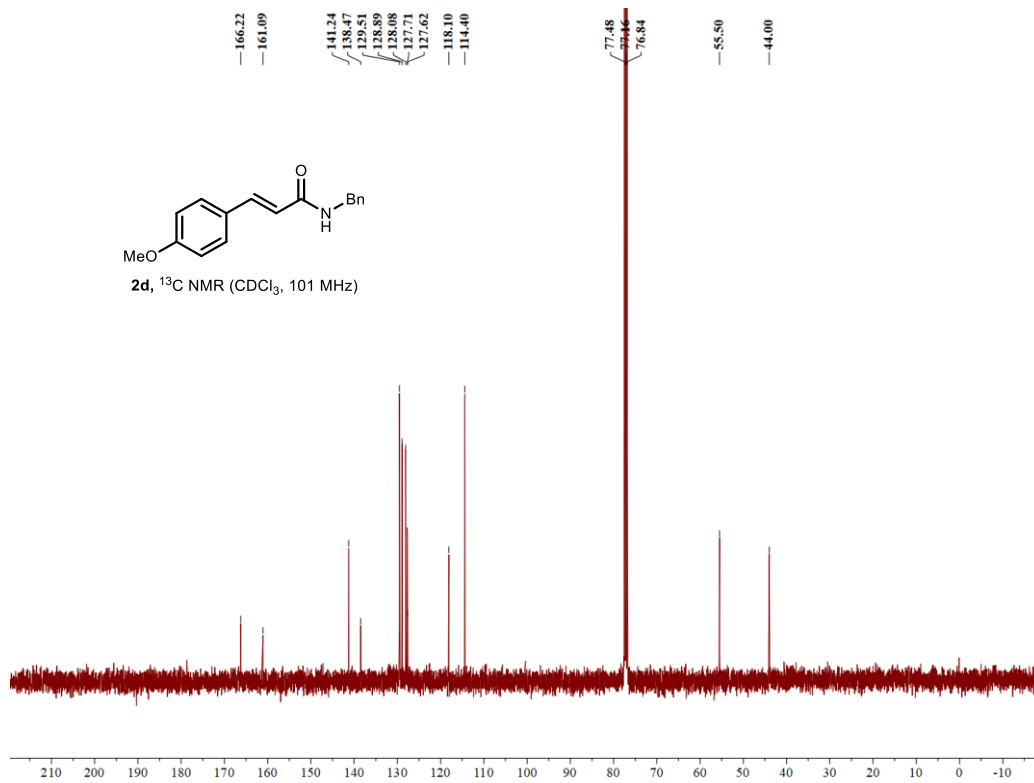

Figure S65.  $^{13}\text{C NMR}$  of **2d** ( $\text{CDCl}_3$ , 101 MHz)

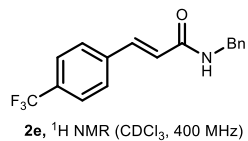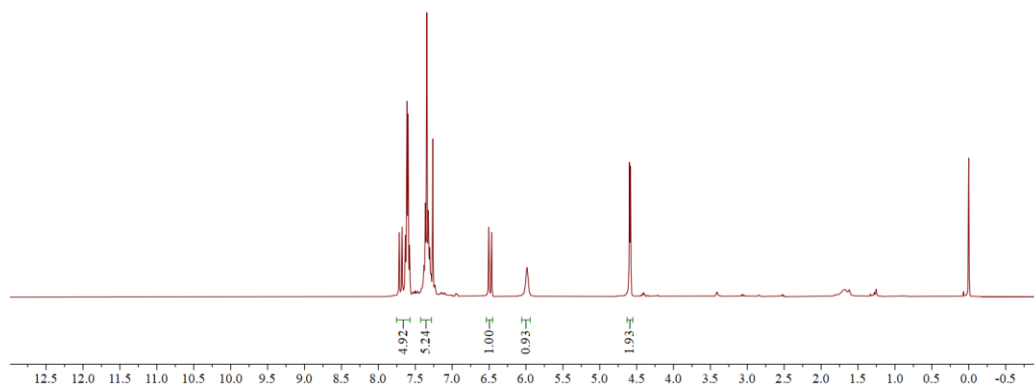

**Figure S66.**  $^1\text{H NMR}$  of **2e** ( $\text{CDCl}_3$ , 400 MHz)

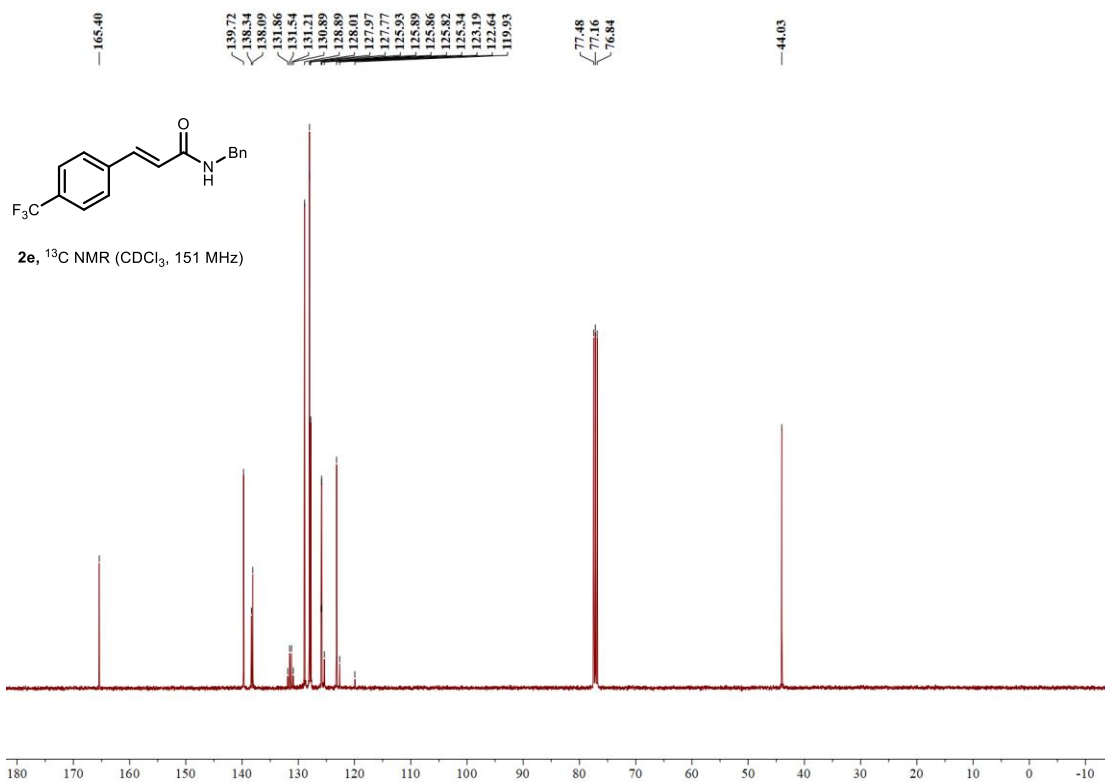

**Figure S67.**  $^{13}\text{C NMR}$  of **2e** ( $\text{CDCl}_3$ , 151 MHz)

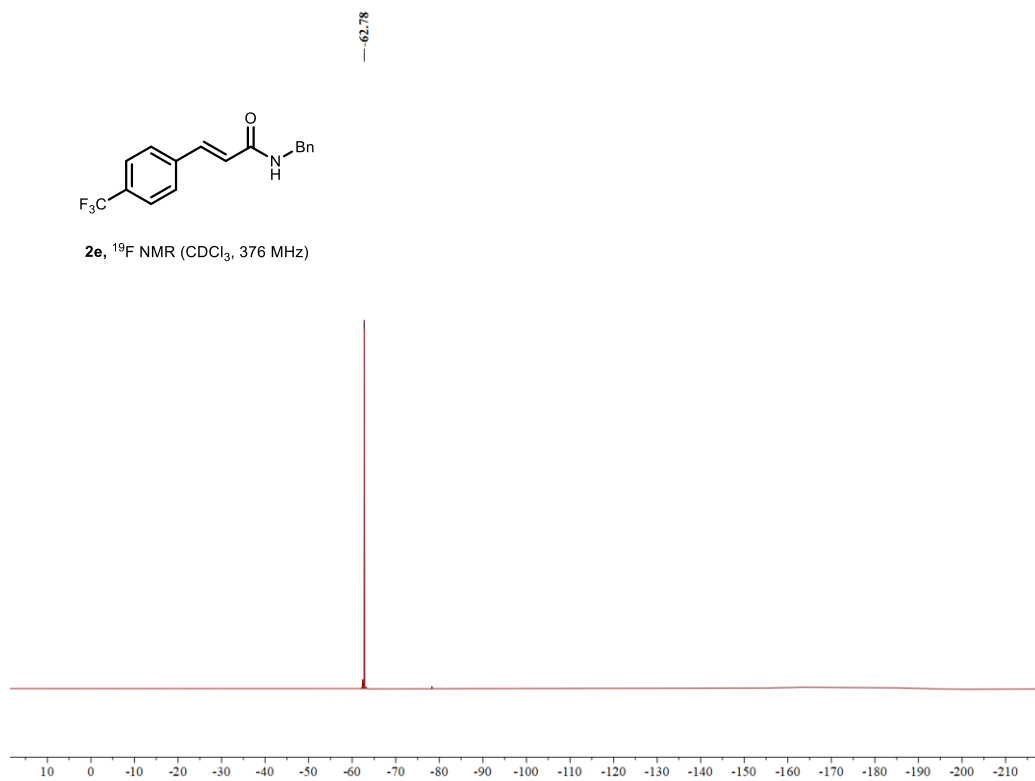

**Figure S68.**  $^{19}\text{F}$  NMR of **2e** ( $\text{CDCl}_3$ , 376 MHz)

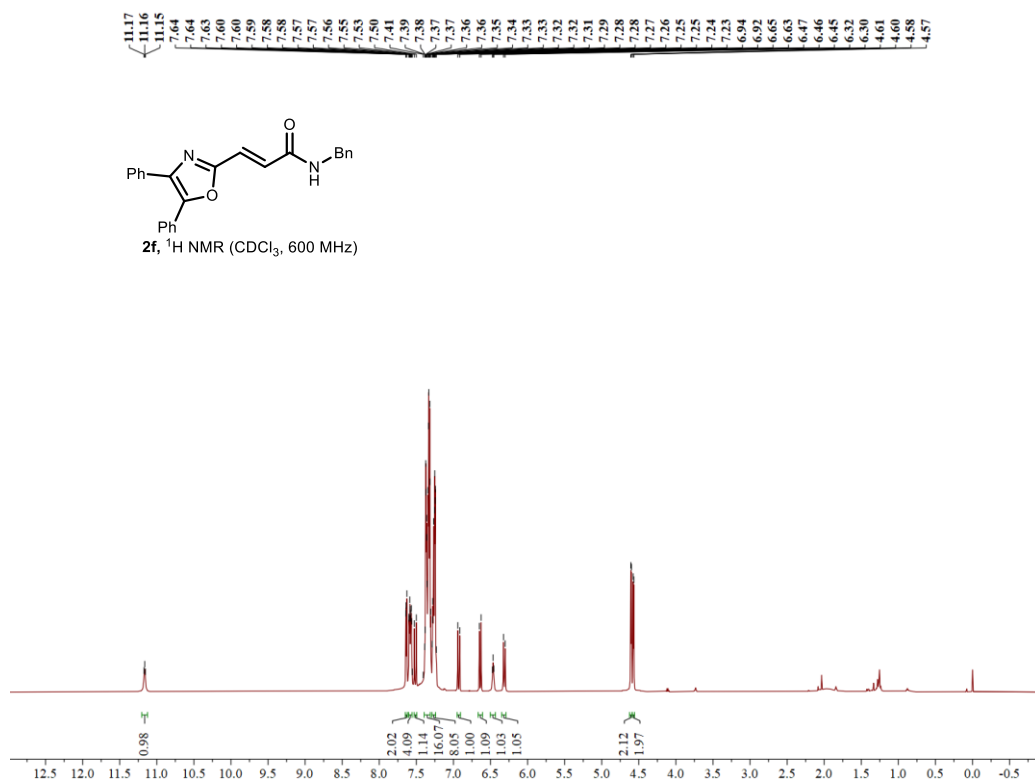

**Figure S69.**  $^1\text{H}$  NMR of **2f** ( $\text{CDCl}_3$ , 600 MHz)

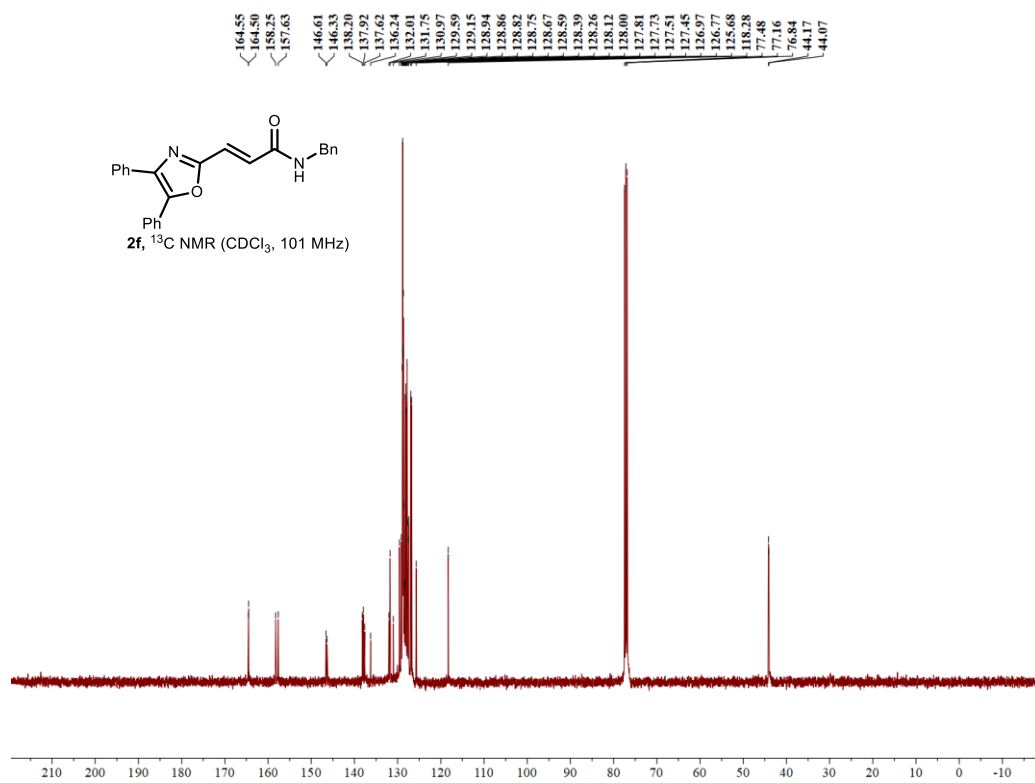

**Figure S70.**  $^{13}\text{C}$  NMR of **2f** ( $\text{CDCl}_3$ , 101 MHz)

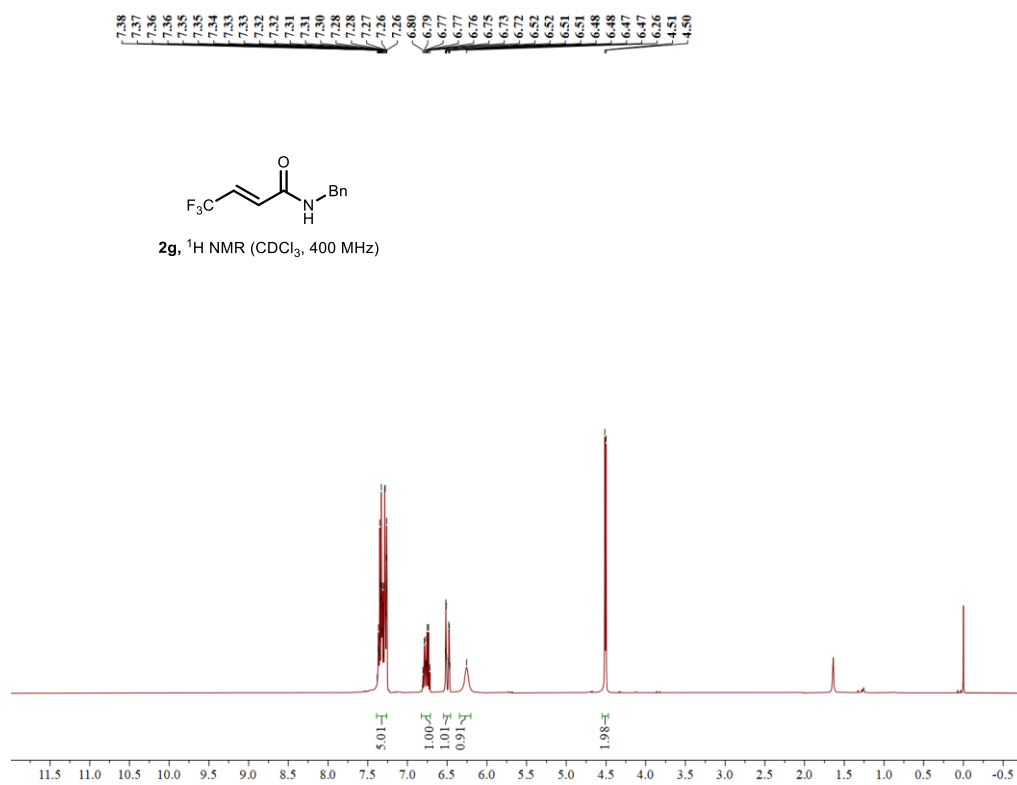

**Figure S71.**  $^1\text{H}$  NMR of **2g** ( $\text{CDCl}_3$ , 400 MHz)



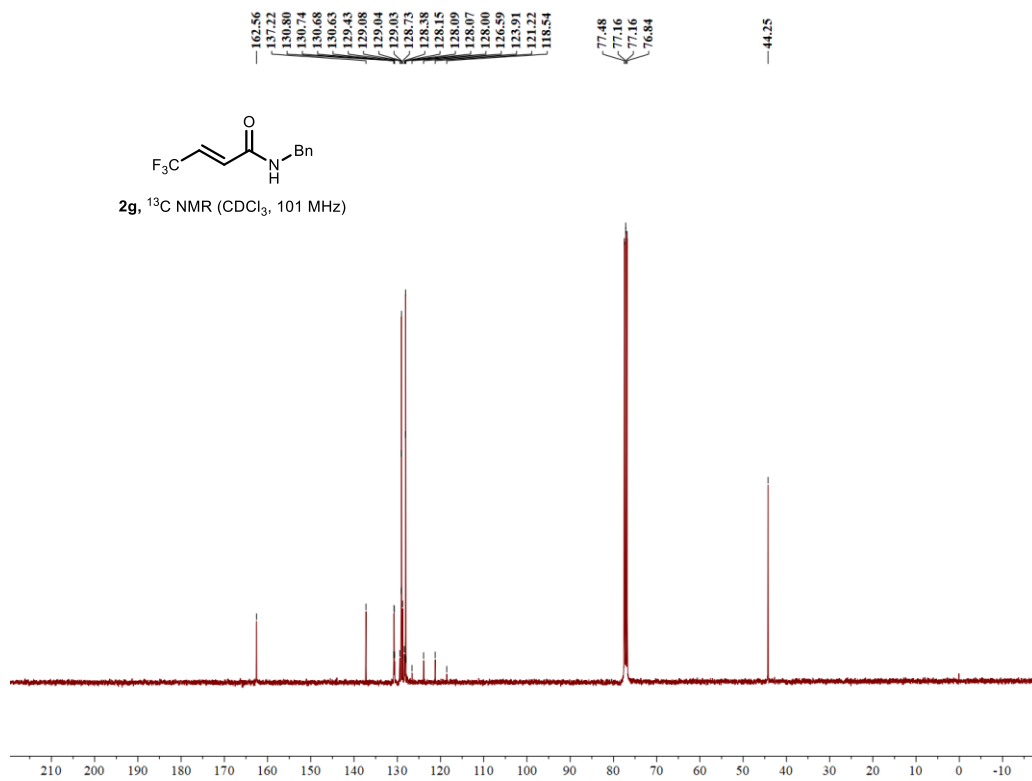

**Figure S72.**  $^{13}\text{C}$  NMR of **2g** ( $\text{CDCl}_3$ , 101 MHz)

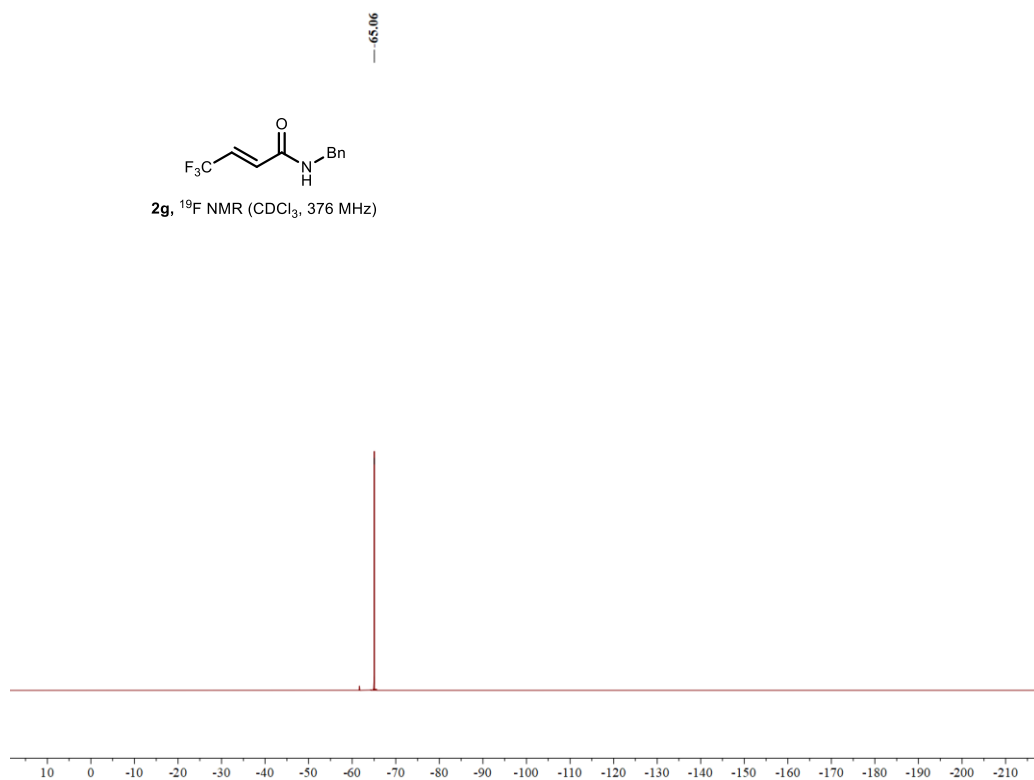

**Figure S73**  $^{19}\text{F}$  NMR of **2g** ( $\text{CDCl}_3$ , 376 MHz)

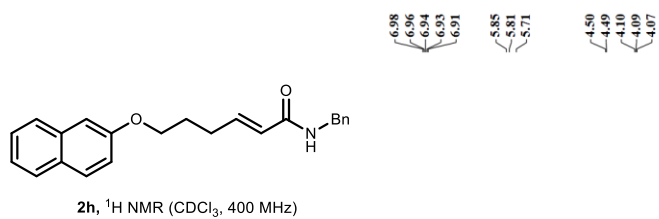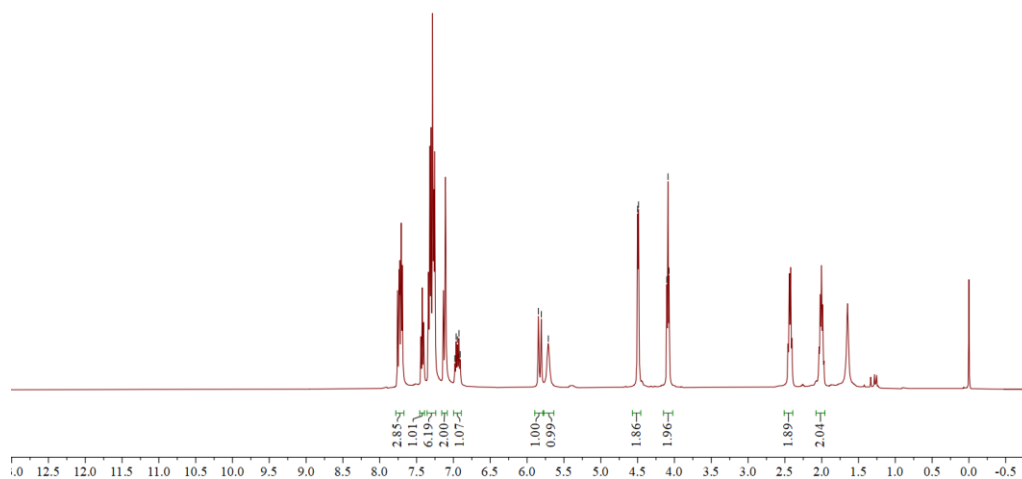

**Figure S74.**  $^1\text{H NMR}$  of **2h** ( $\text{CDCl}_3$ , 400 MHz)

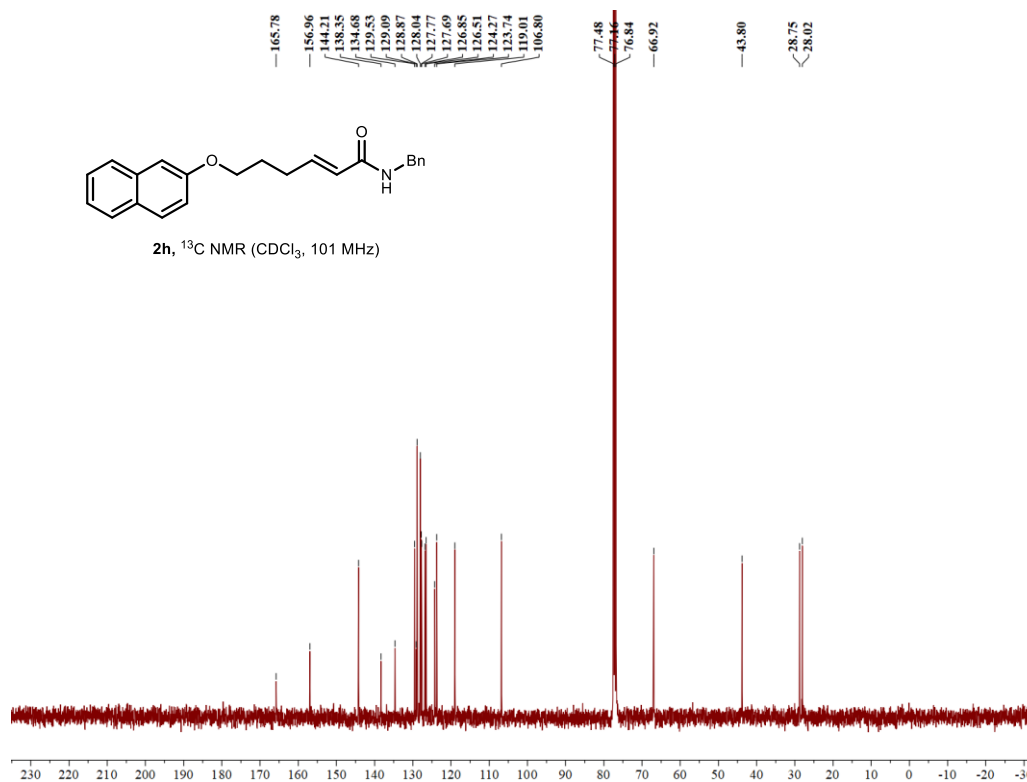

**Figure S75.**  $^{13}\text{C NMR}$  of **2h** ( $\text{CDCl}_3$ , 101 MHz)

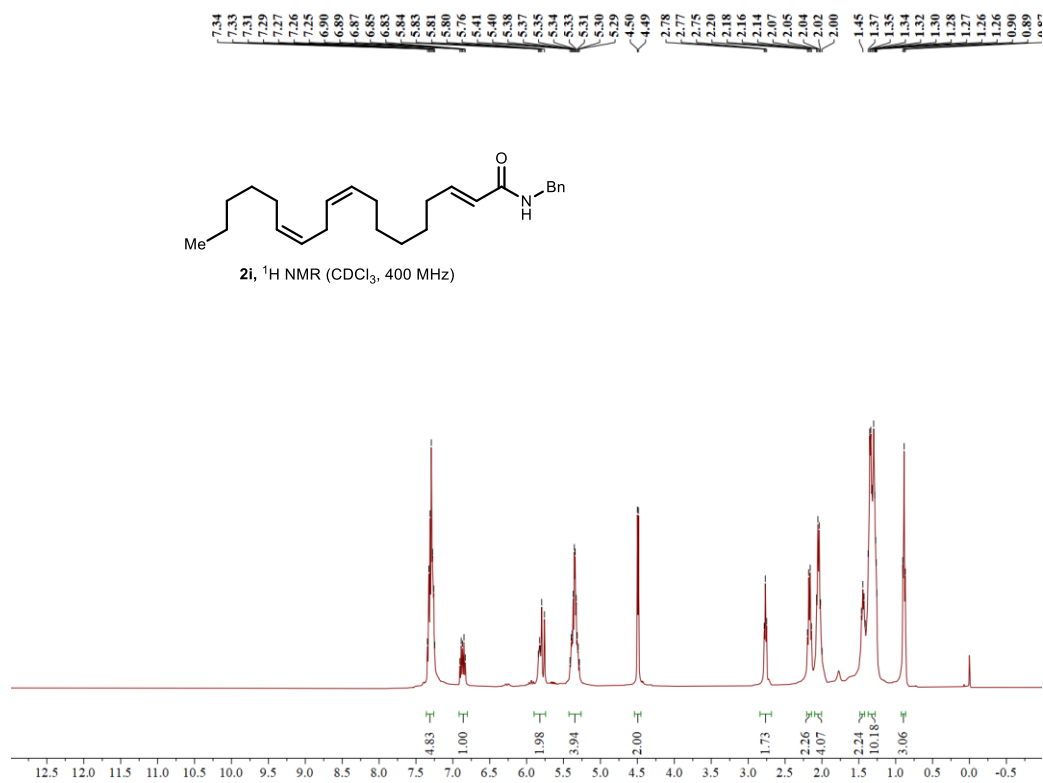

**Figure S76.**  $^1\text{H}$  NMR of **2i** ( $\text{CDCl}_3$ , 400 MHz)

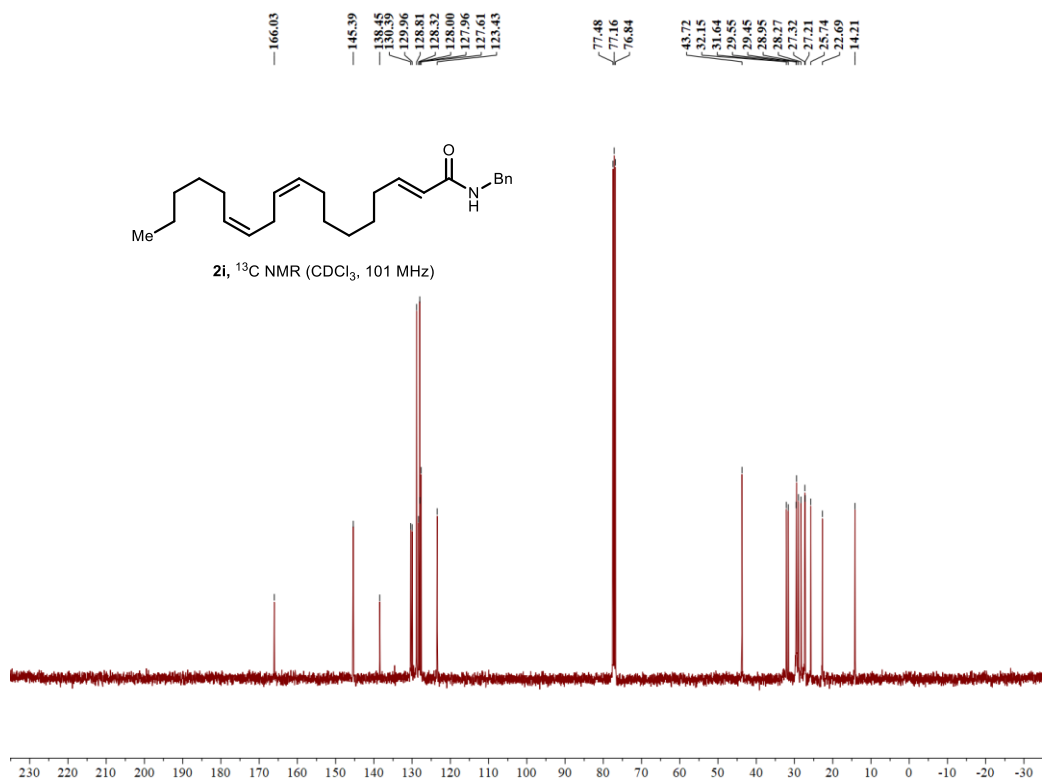

**Figure S77.**  $^{13}\text{C}$  NMR of **2i** ( $\text{CDCl}_3$ , 101 MHz)

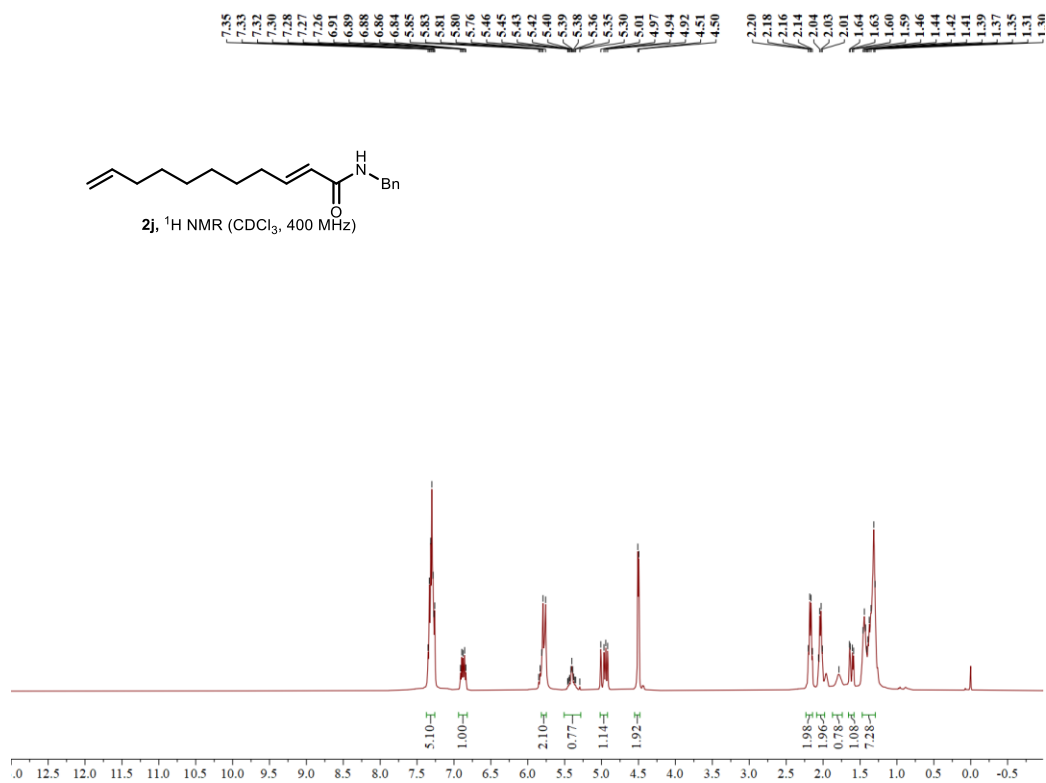

**Figure S78.**  $^1\text{H}$  NMR of **2j** ( $\text{CDCl}_3$ , 400 MHz)

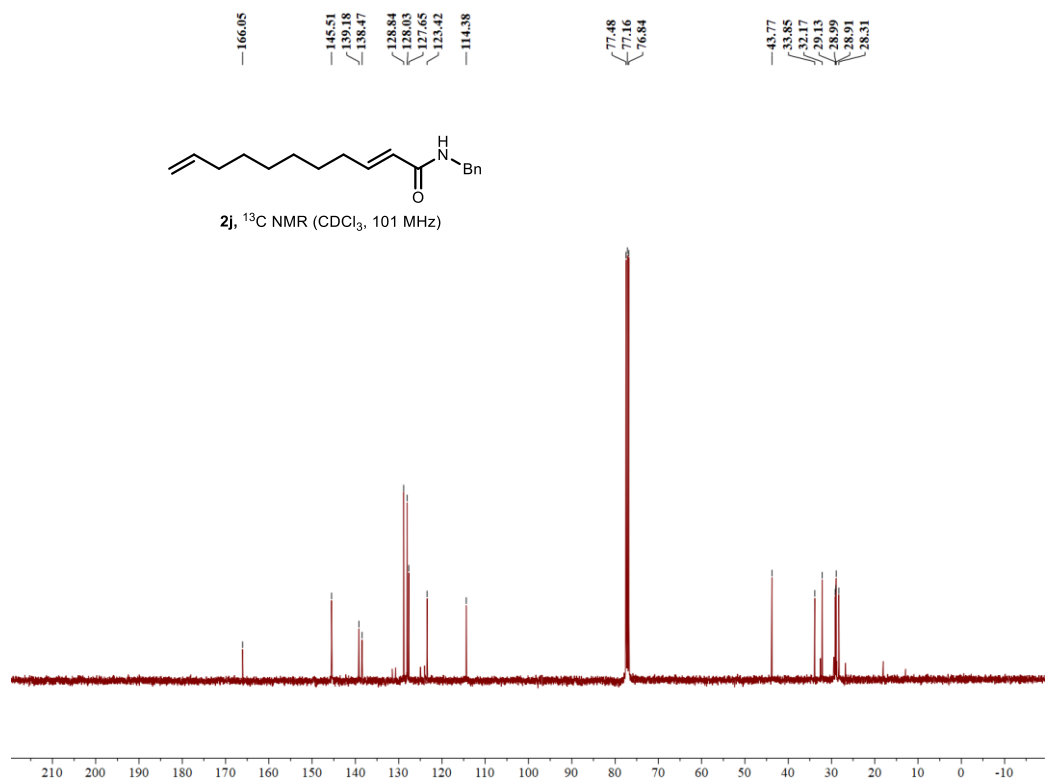

**Figure S79.**  $^{13}\text{C}$  NMR of **2j** ( $\text{CDCl}_3$ , 101 MHz)

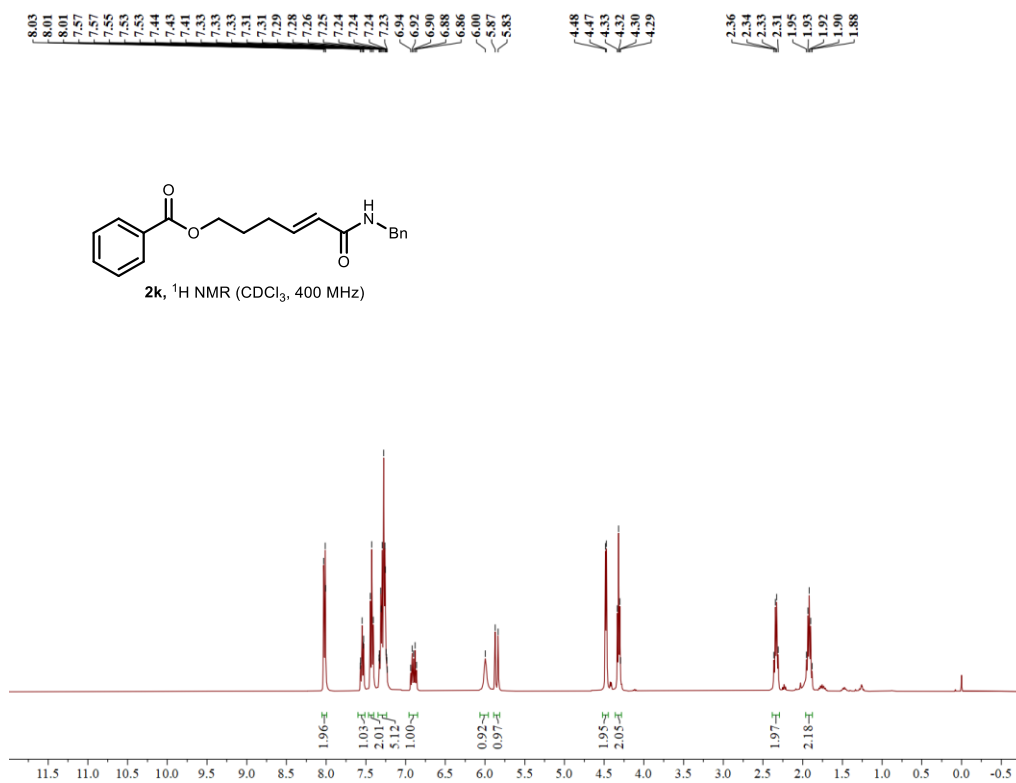

**Figure S80.**  $^1\text{H}$  NMR of **2k** ( $\text{CDCl}_3$ , 400 MHz)

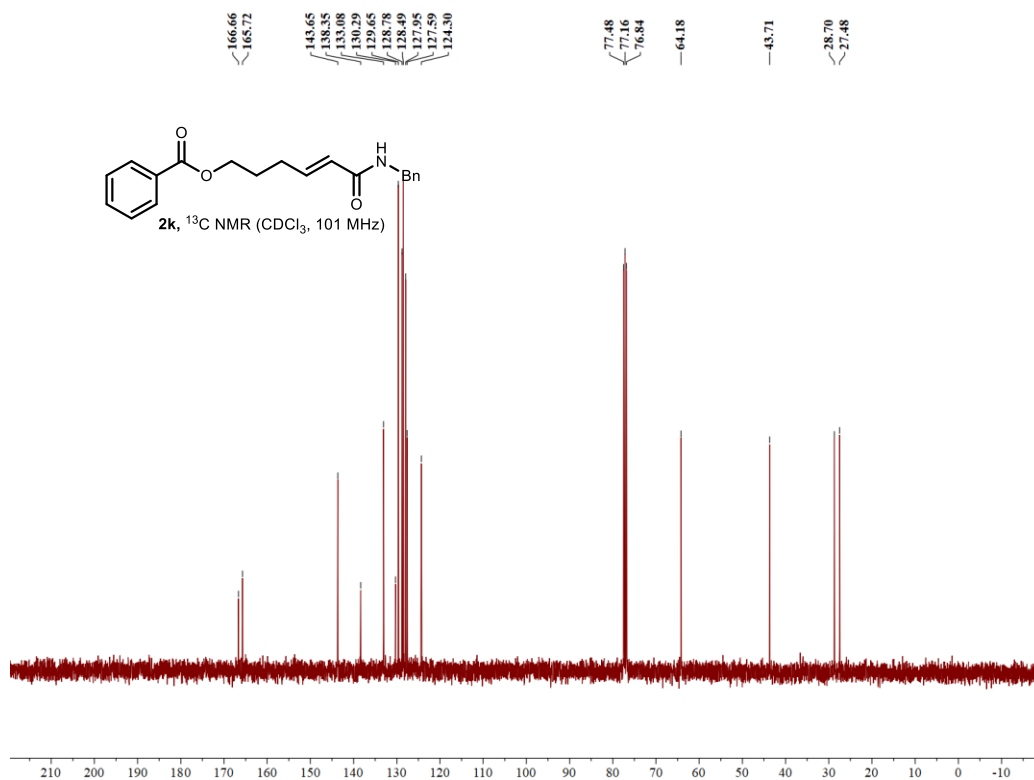

**Figure S81.**  $^{13}\text{C}$  NMR of **2k** ( $\text{CDCl}_3$ , 101 MHz)

7.34  
7.32  
7.30  
7.29  
7.28  
7.27  
7.26  
7.25  
6.88  
6.86  
6.84  
6.82  
5.93  
5.79  
5.75  
4.49  
4.47  
2.60  
2.58  
2.56  
2.54  
2.52  
2.50  
1.85  
1.83  
1.82  
1.80  
1.79  
1.77  
1.75  
1.73  
1.72  
1.71  
1.70  
1.69  
1.68  
1.67  
1.66  
1.65  
1.64  
1.63  
1.61  
1.60  
1.59  
1.58  
1.57  
1.56  
1.55  
1.54  
1.53  
1.42  
1.40  
1.39  
1.38  
1.37  
1.35

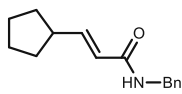

21,  $^1\text{H}$  NMR ( $\text{CDCl}_3$ , 400 MHz)

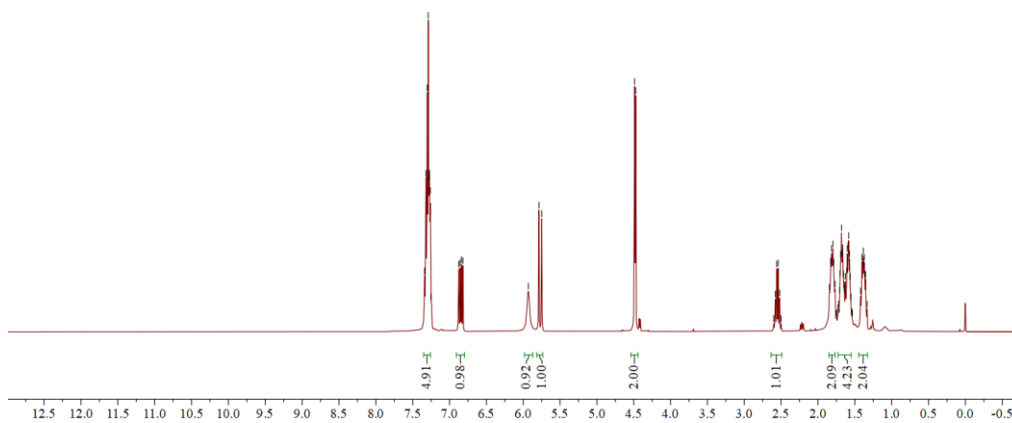

Figure S82.  $^1\text{H}$  NMR of 21 ( $\text{CDCl}_3$ , 400 MHz)

166.28  
149.54  
138.52  
128.78  
127.98  
127.92  
127.56  
121.57  
77.37  
77.16  
76.95  
43.71  
42.83  
32.62  
25.33

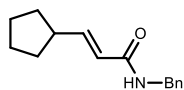

21,  $^{13}\text{C}$  NMR ( $\text{CDCl}_3$ , 151 MHz)

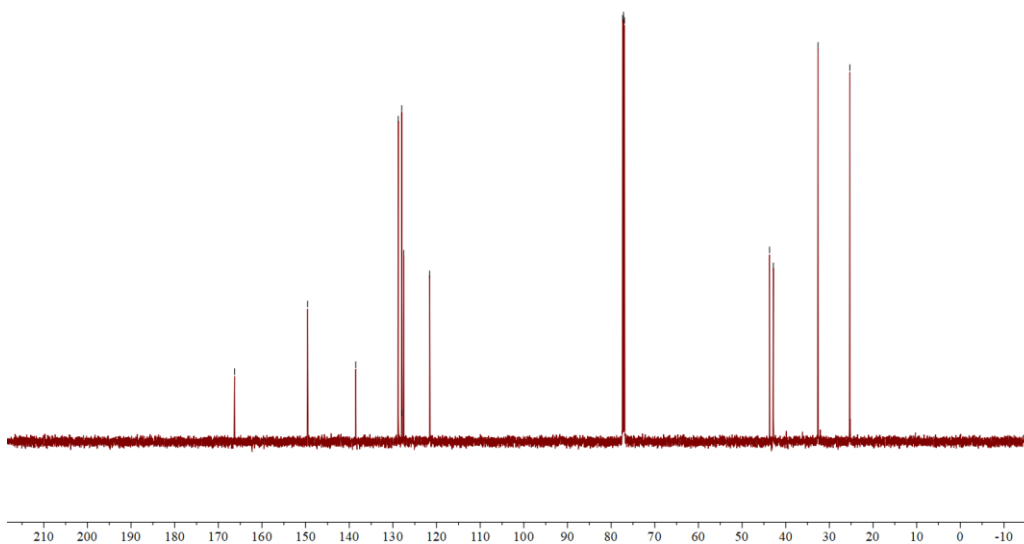

Figure S83.  $^{13}\text{C}$  NMR of 21 ( $\text{CDCl}_3$ , 151 MHz)

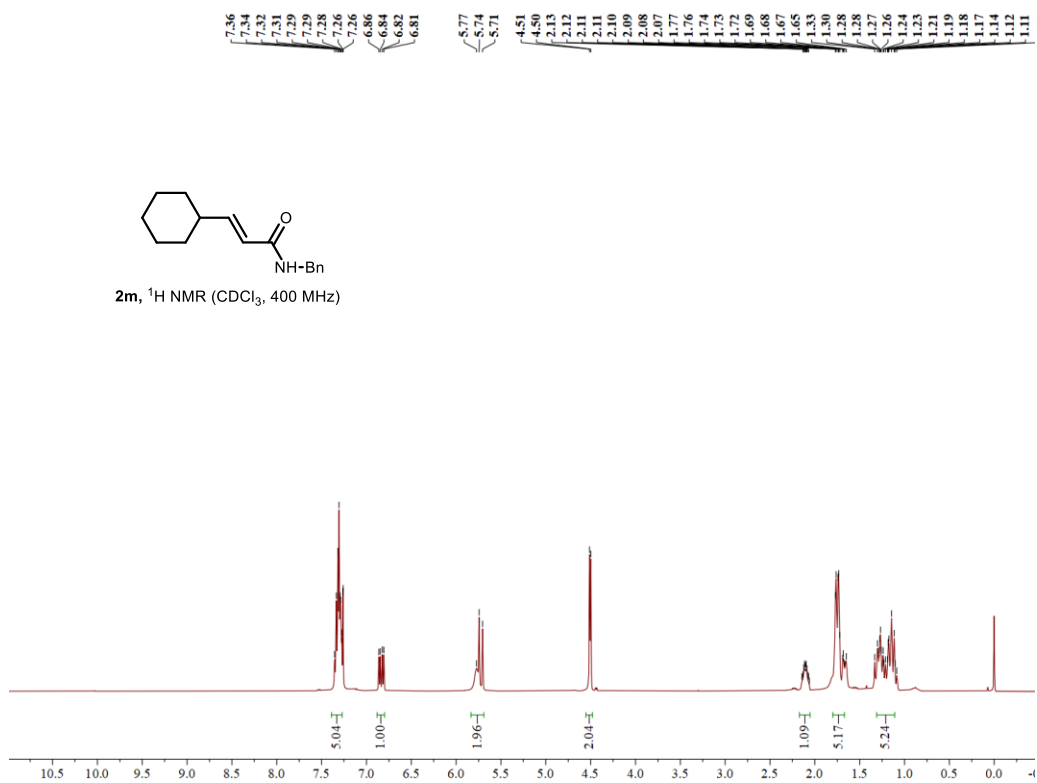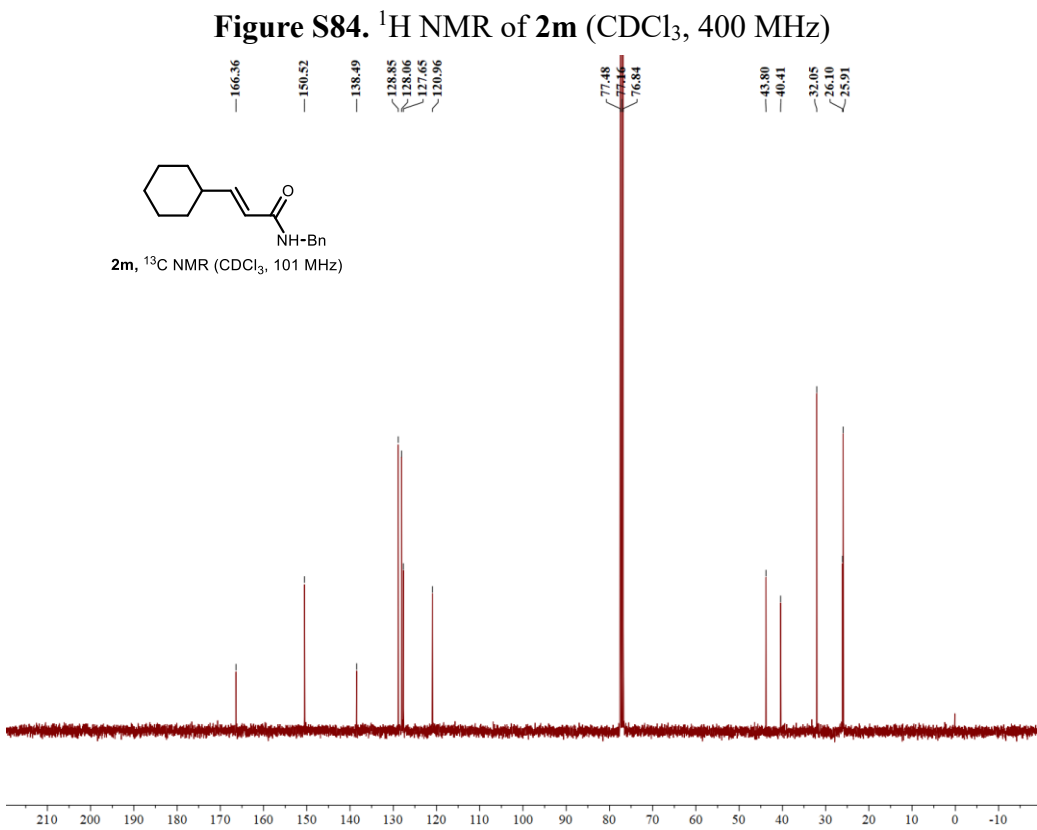

**Figure S85.**  $^{13}\text{C}$  NMR of **2m** ( $\text{CDCl}_3$ , 101 MHz)

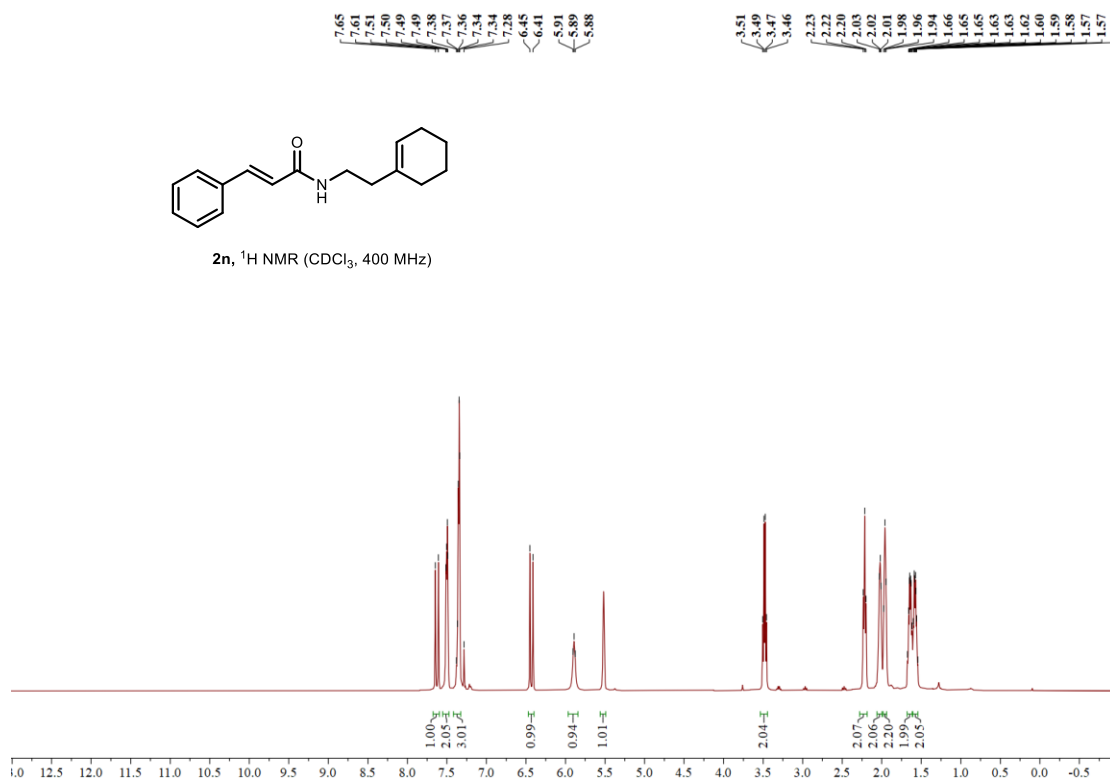

**Figure S86.**  $^1\text{H}$  NMR of **2n** ( $\text{CDCl}_3$ , 400 MHz)

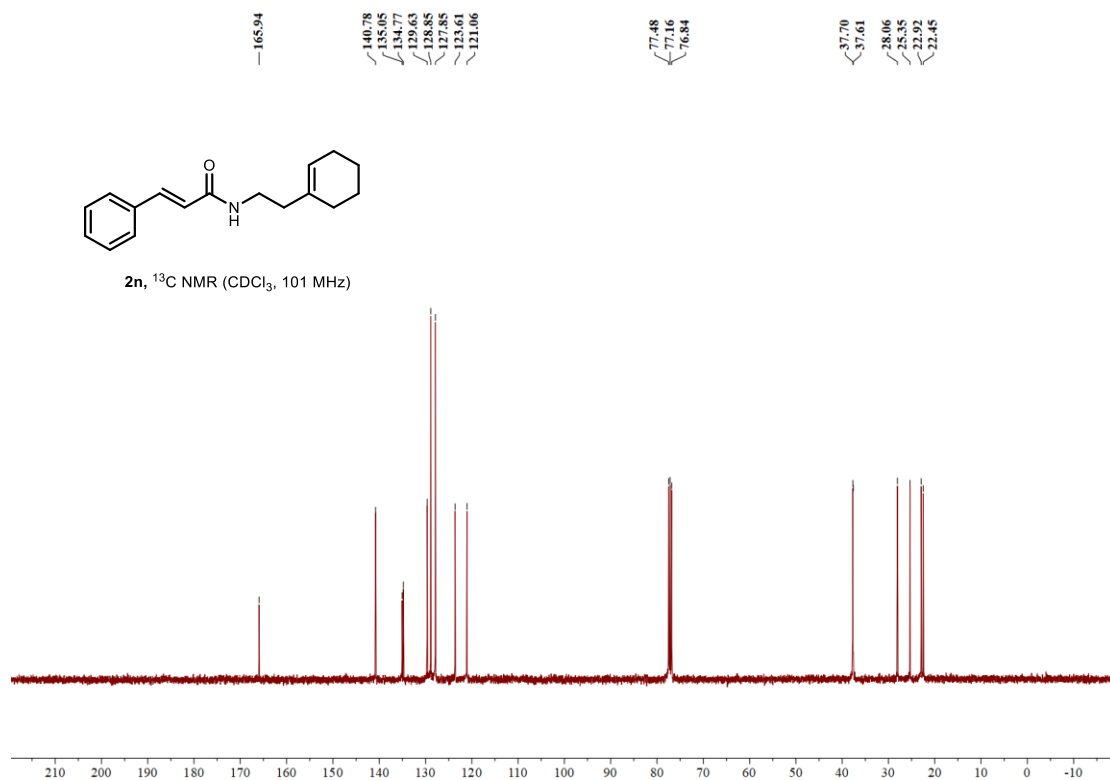

**Figure S87.**  $^{13}\text{C}$  NMR of **2n** ( $\text{CDCl}_3$ , 101 MHz)



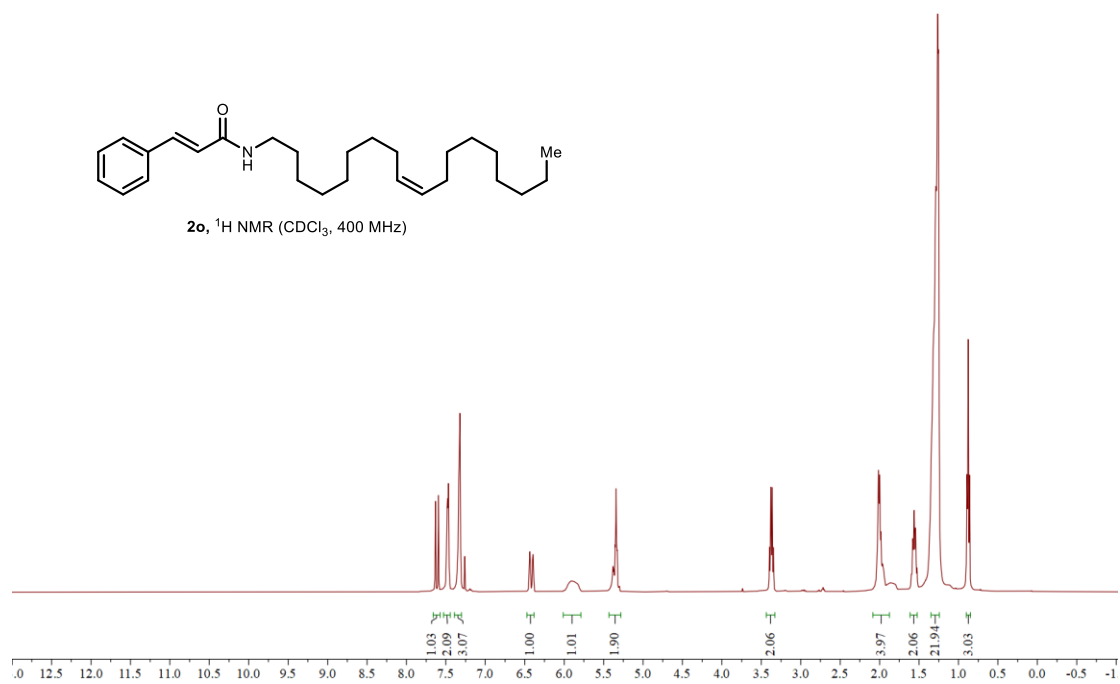

**Figure S88.**  $^1\text{H}$  NMR of **2o** ( $\text{CDCl}_3$ , 400 MHz)

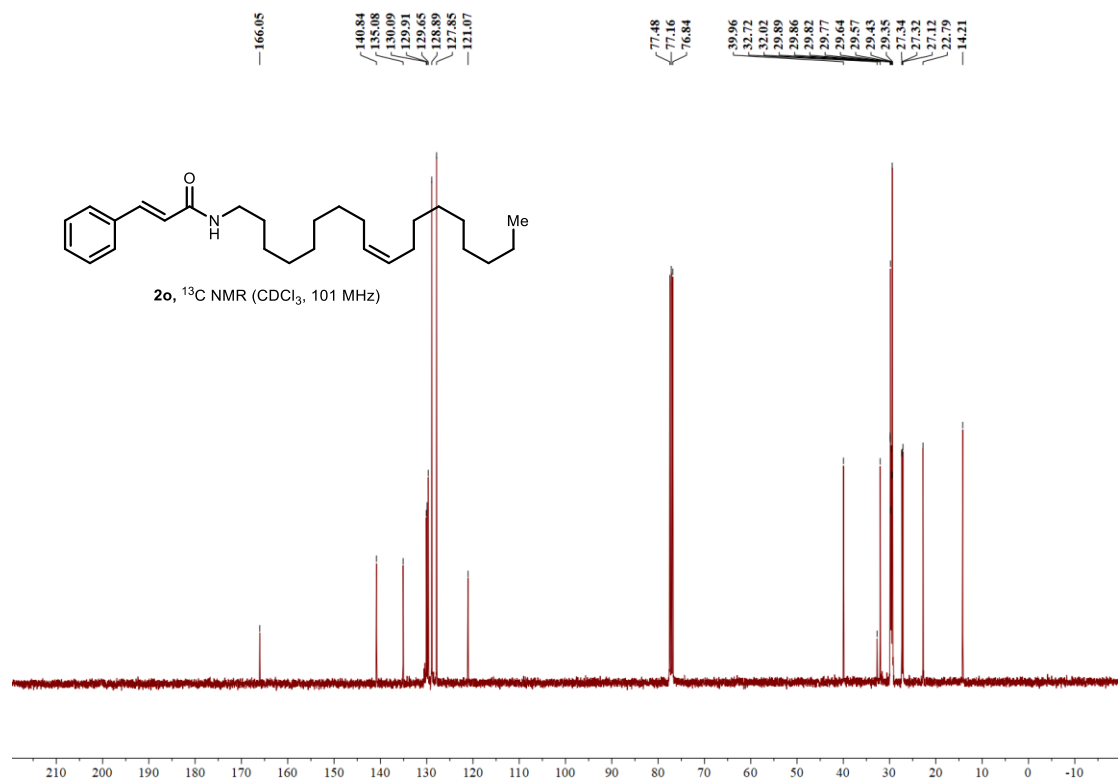

**Figure S89.**  $^{13}\text{C}$  NMR of **2o** ( $\text{CDCl}_3$ , 101 MHz)

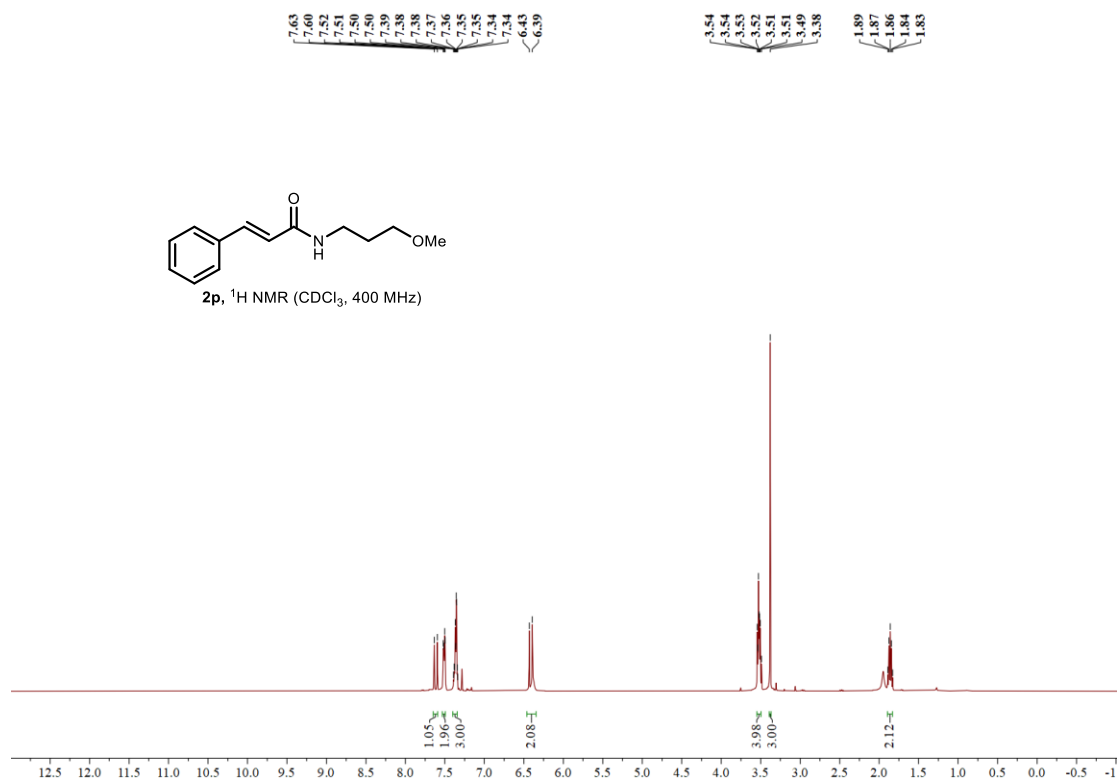

**Figure S90.**  $^1\text{H}$  NMR of **2p** ( $\text{CDCl}_3$ , 400 MHz)

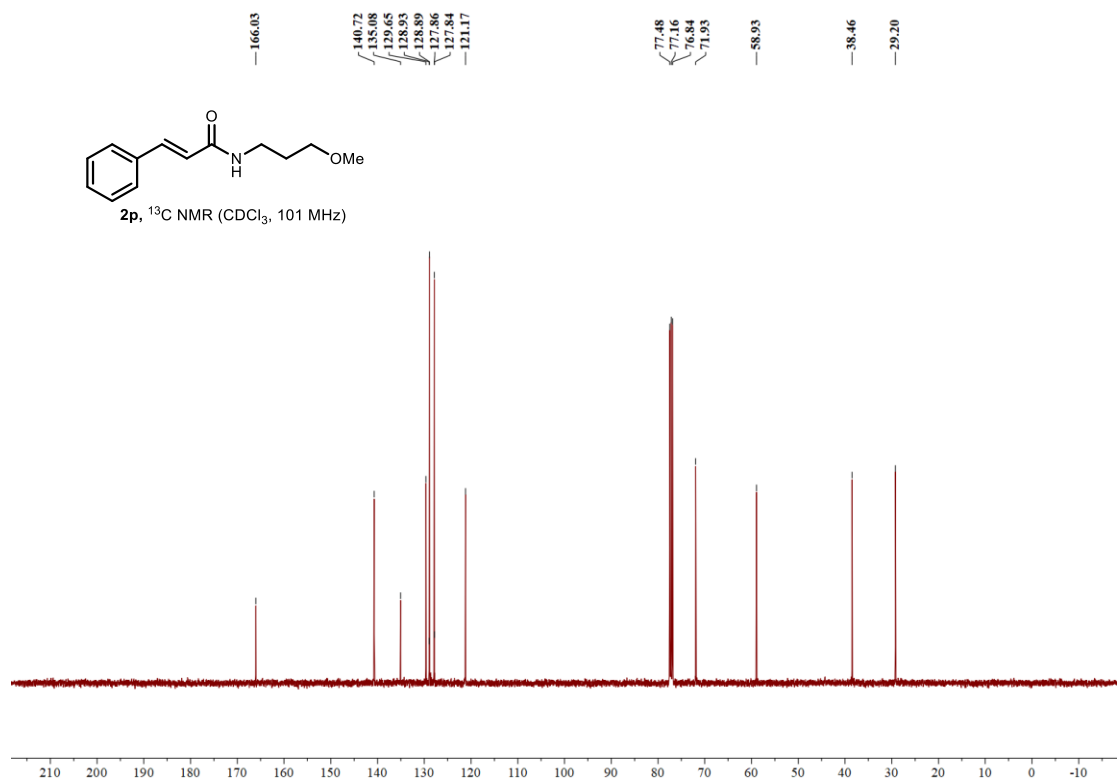

**Figure S91.**  $^{13}\text{C}$  NMR of **2p** ( $\text{CDCl}_3$ , 101 MHz)

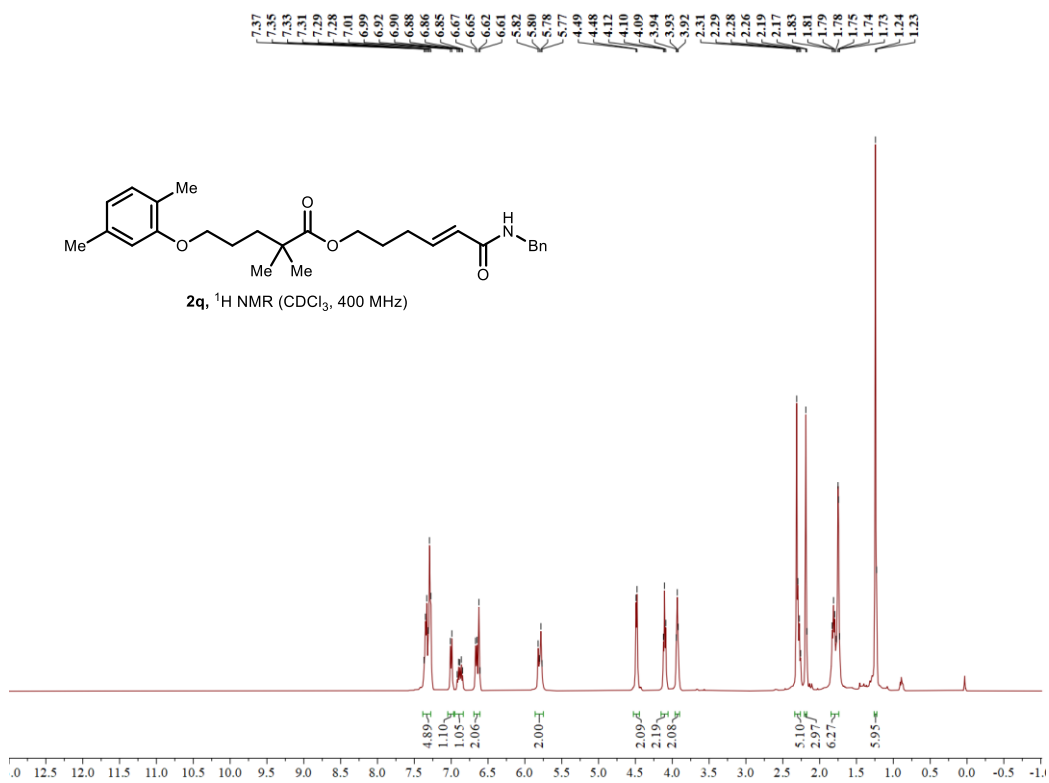

**Figure S92.** <sup>1</sup>H NMR of **2q** (CDCl<sub>3</sub>, 400 MHz)

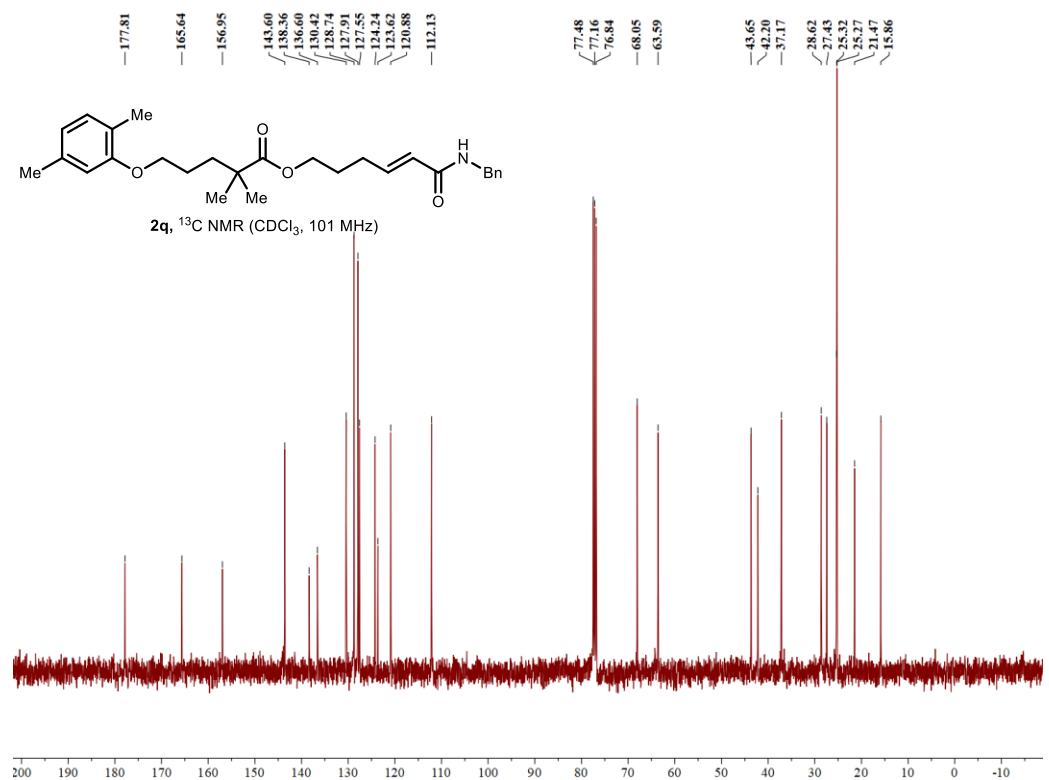

**Figure S93.** <sup>13</sup>C NMR of **2q** (CDCl<sub>3</sub>, 101 MHz)

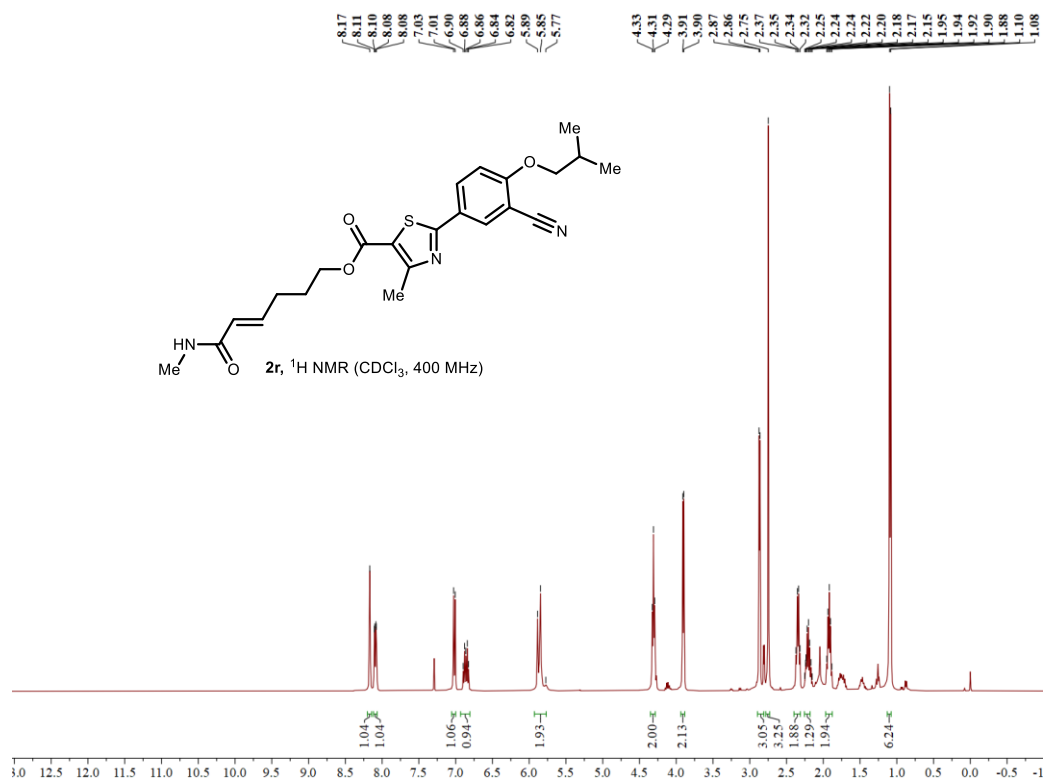

**Figure S94.**  $^1\text{H NMR}$  of **2r** ( $\text{CDCl}_3$ , 400 MHz)

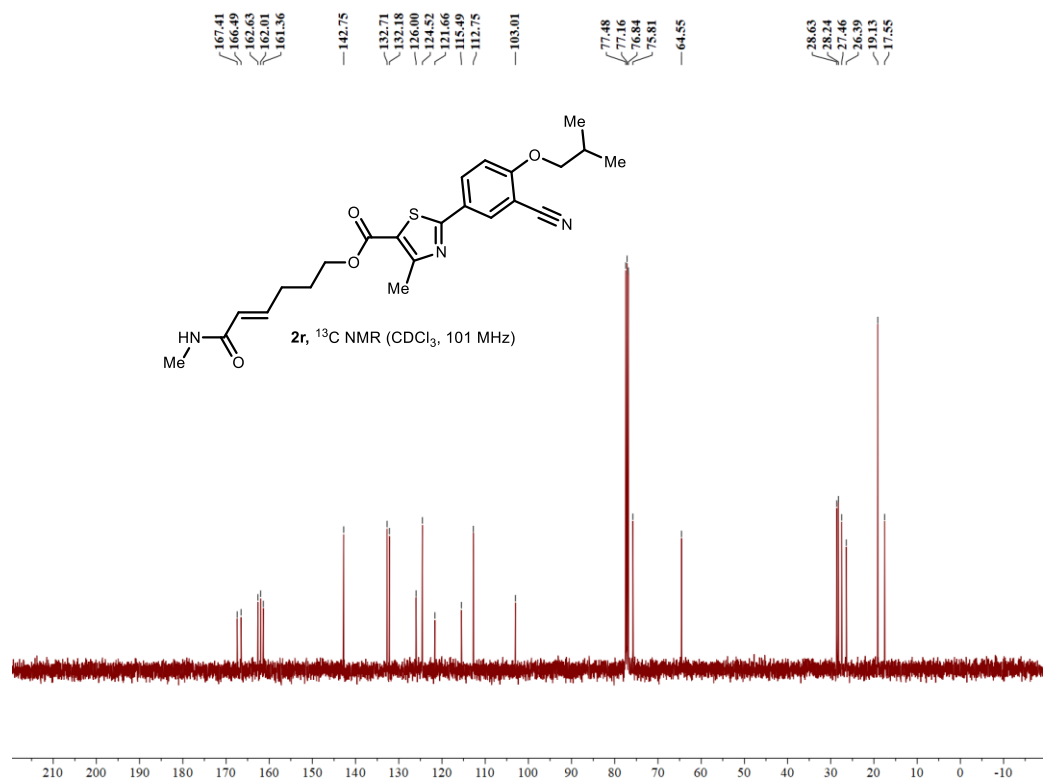

**Figure S95.**  $^{13}\text{C NMR}$  of **2r** ( $\text{CDCl}_3$ , 101 MHz)

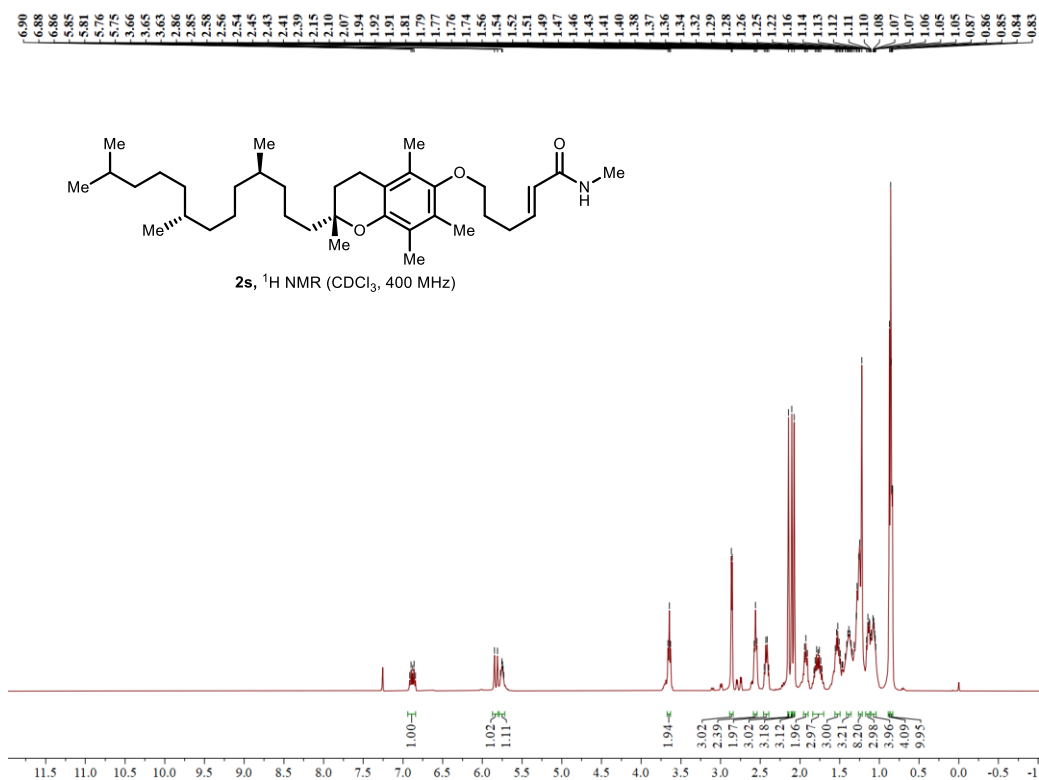

Figure S96.  $^1\text{H}$  NMR of 2s ( $\text{CDCl}_3$ , 400 MHz)

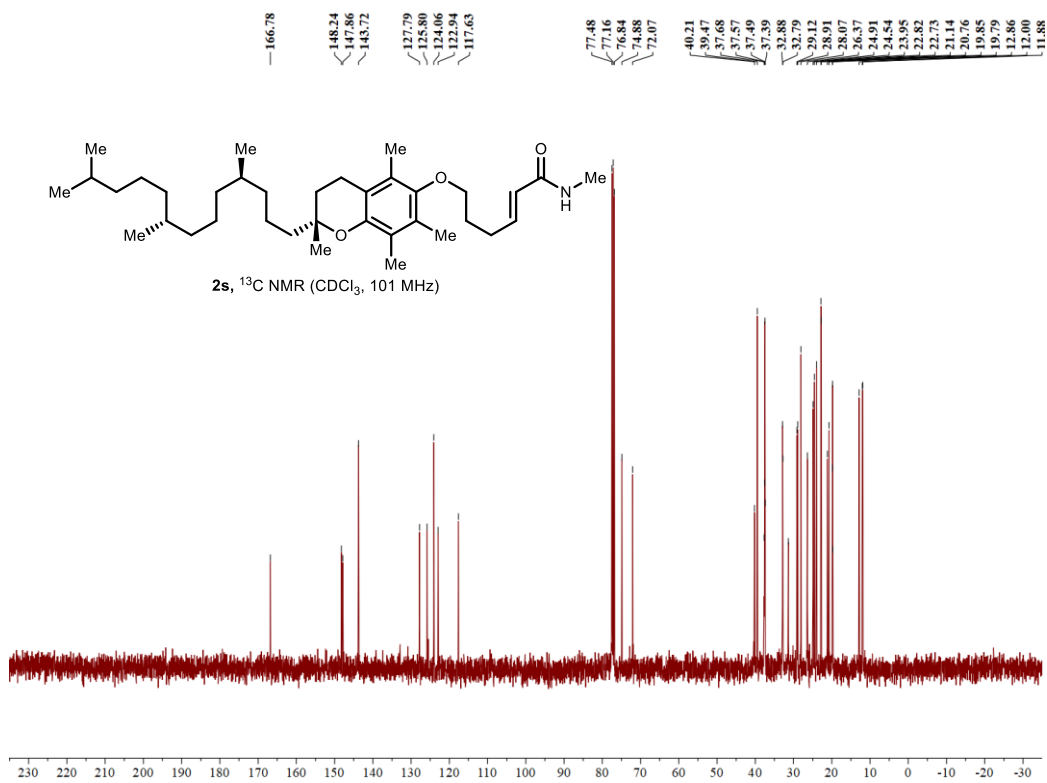

Figure S97.  $^{13}\text{C}$  NMR of 2s ( $\text{CDCl}_3$ , 101 MHz)

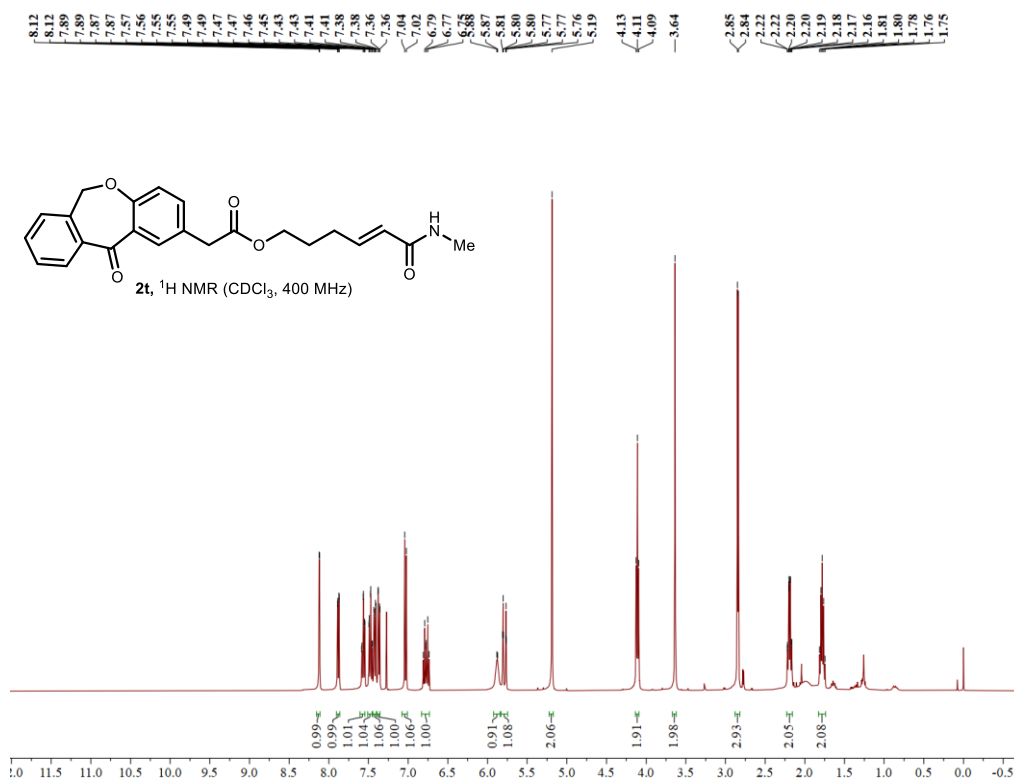

**Figure S98.**  $^1\text{H}$  NMR of **2t** ( $\text{CDCl}_3$ , 400 MHz)

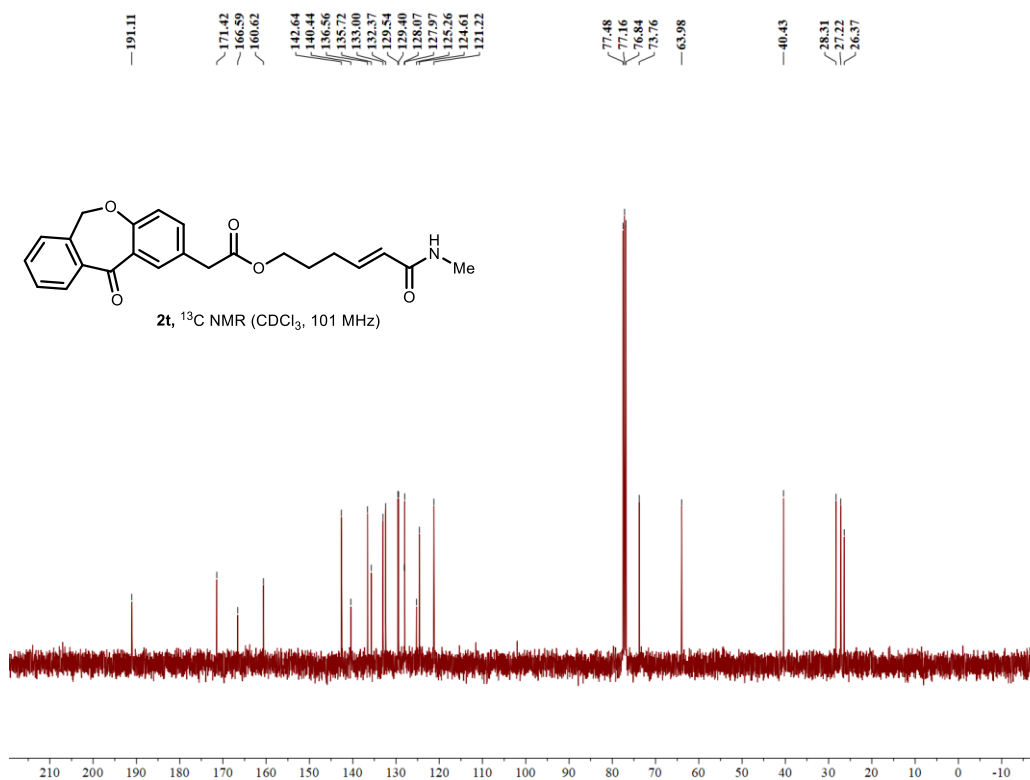

**Figure S99.**  $^{13}\text{C}$  NMR of **2t** ( $\text{CDCl}_3$ , 101 MHz)

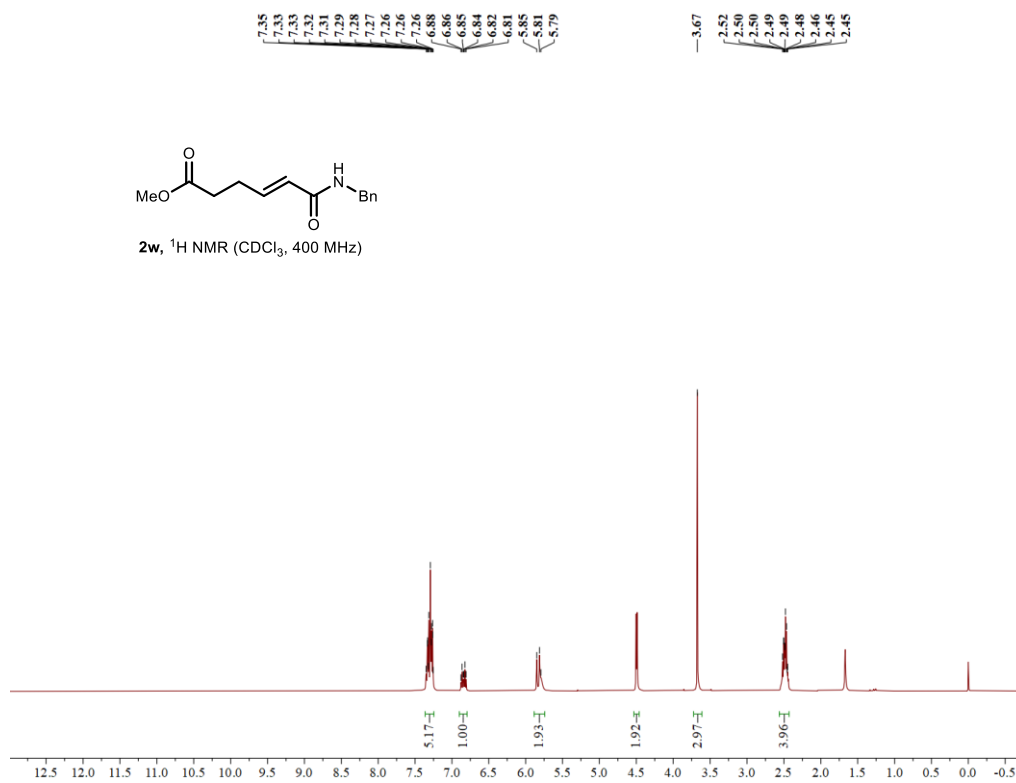

**Figure S100.**  $^1\text{H NMR}$  of **2w** ( $\text{CDCl}_3$ , 400 MHz)

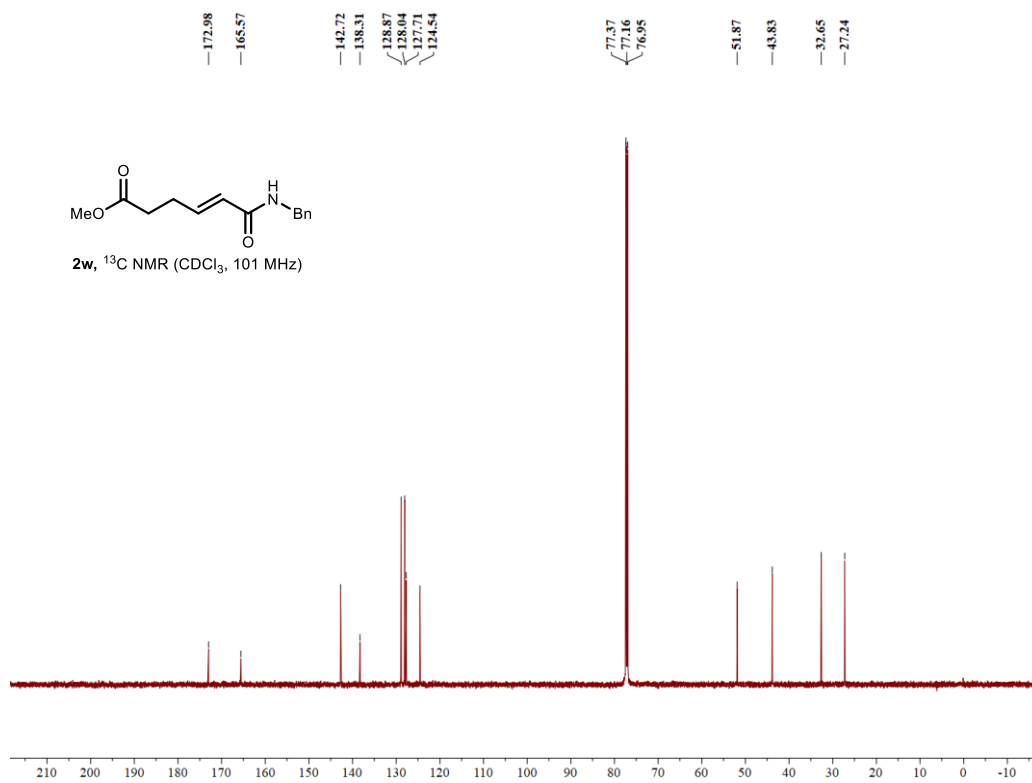

**Figure S101.**  $^{13}\text{C NMR}$  of **2w** ( $\text{CDCl}_3$ , 101 MHz)

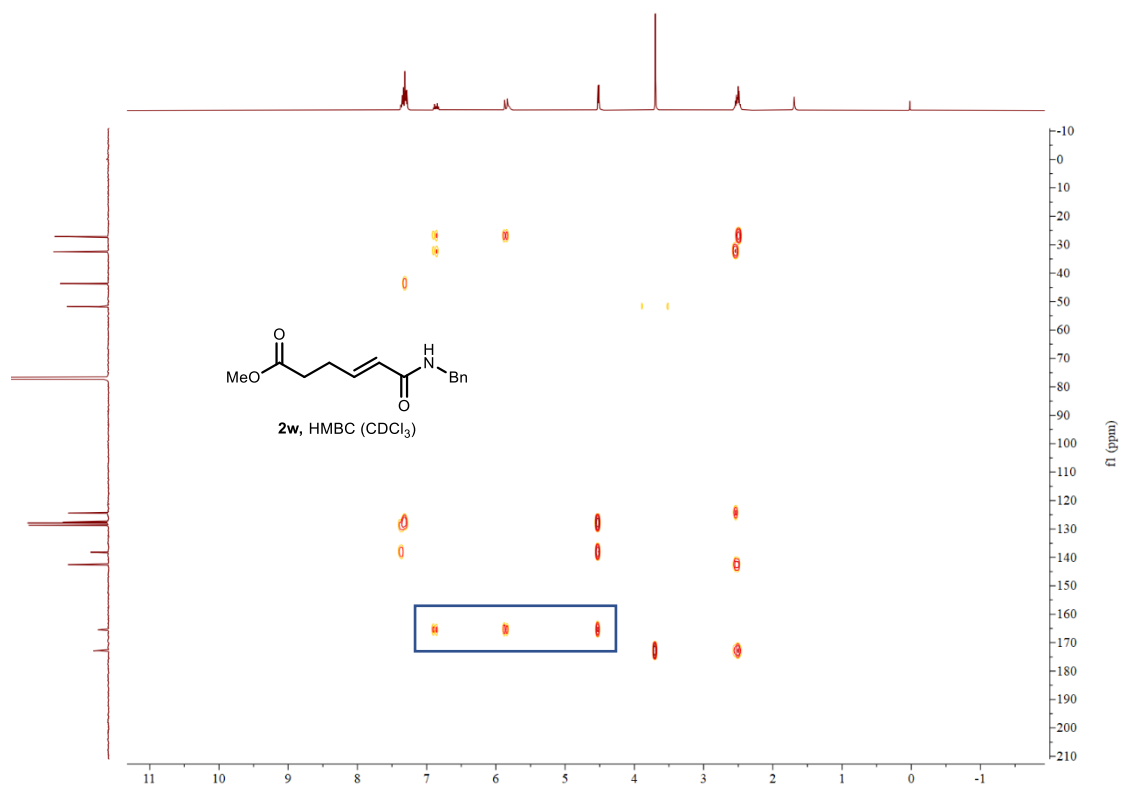

Figure S102 HMBC of 2w

7.56, 7.56, 7.55, 7.55, 7.50, 7.50, 7.49, 7.49, 7.49, 7.49, 7.31, 7.30, 7.30, 7.29, 7.29, 7.28, 7.28, 7.27, 7.26, 7.25, 7.25, 7.24, 7.24, 7.19, 6.71, 6.69, 6.68, 6.68, 6.67, 6.66, 5.62, 5.62, 5.62, 5.60, 5.60, 5.60, 5.36, 5.36, 4.07, 4.06, 4.06, 3.12, 3.11, 3.11, 2.86, 2.85, 2.83, 2.74, 2.73, 2.16, 2.15, 2.15, 2.14, 2.13, 2.13, 2.12, 2.12, 2.12, 1.72, 1.71, 1.70

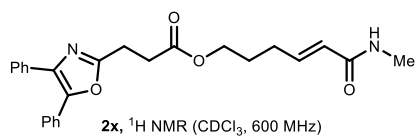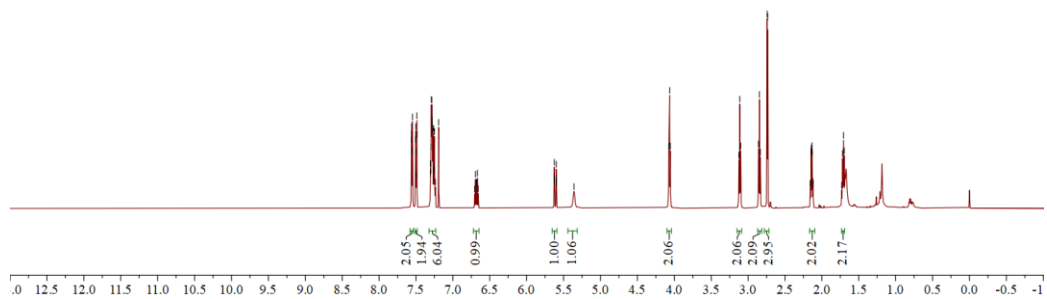

Figure S103. <sup>1</sup>H NMR of 2x (CDCl<sub>3</sub>, 600 MHz)



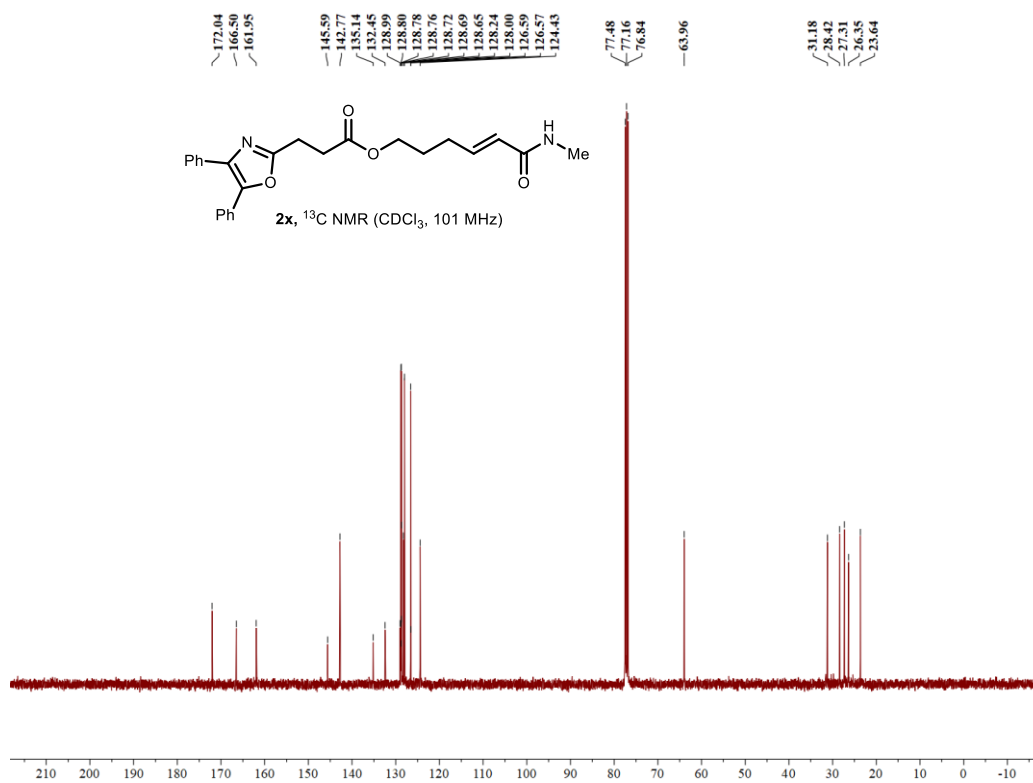

**Figure S104.**  $^{13}\text{C}$  NMR of **2x** (CDCl<sub>3</sub>, 101 MHz)

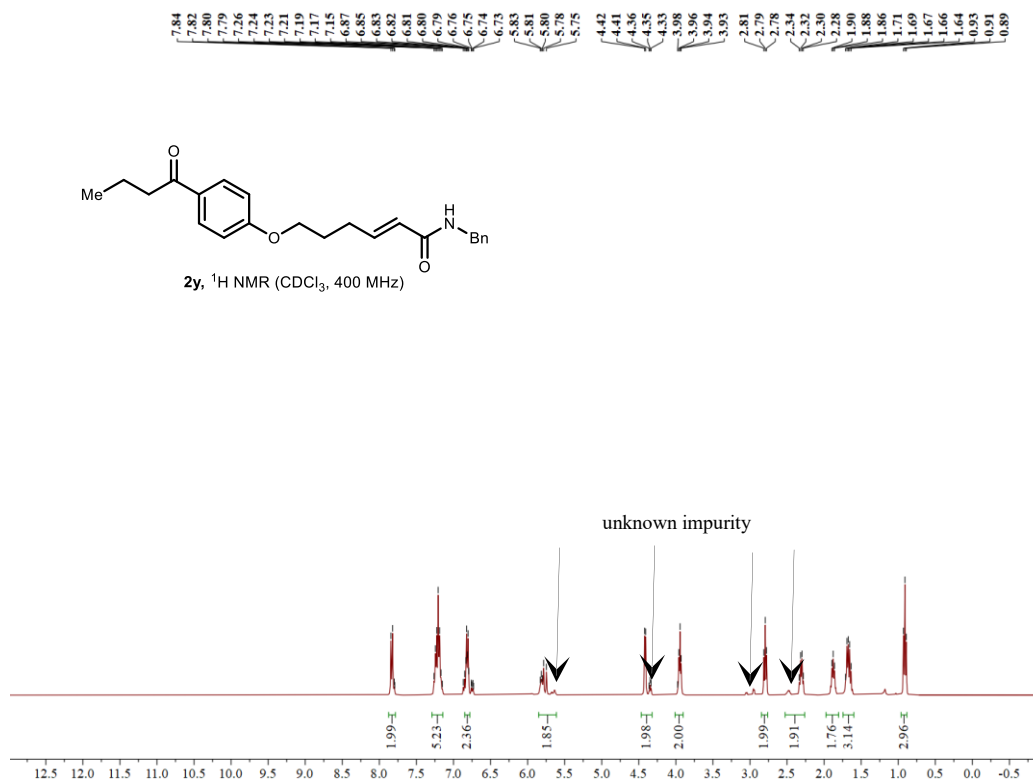

**Figure S105.**  $^1\text{H}$  NMR of **2y** (CDCl<sub>3</sub>, 400 MHz)

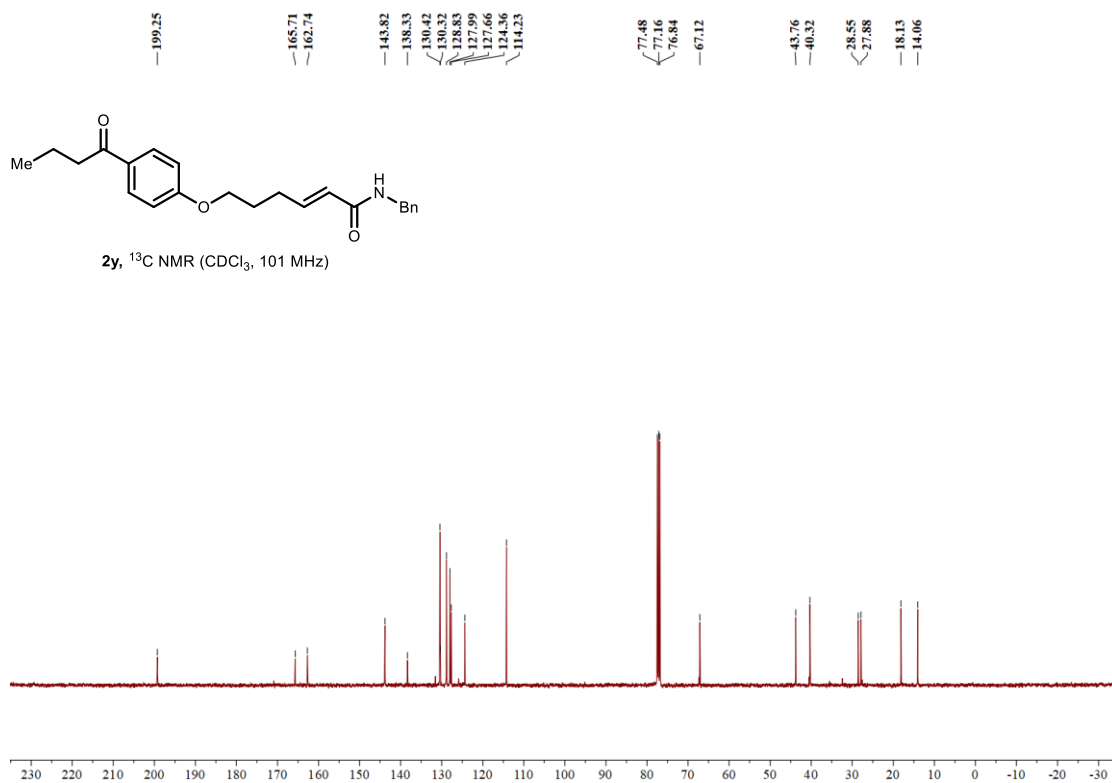

Figure S106.  $^{13}\text{C}$  NMR of **2y** ( $\text{CDCl}_3$ , 101 MHz)

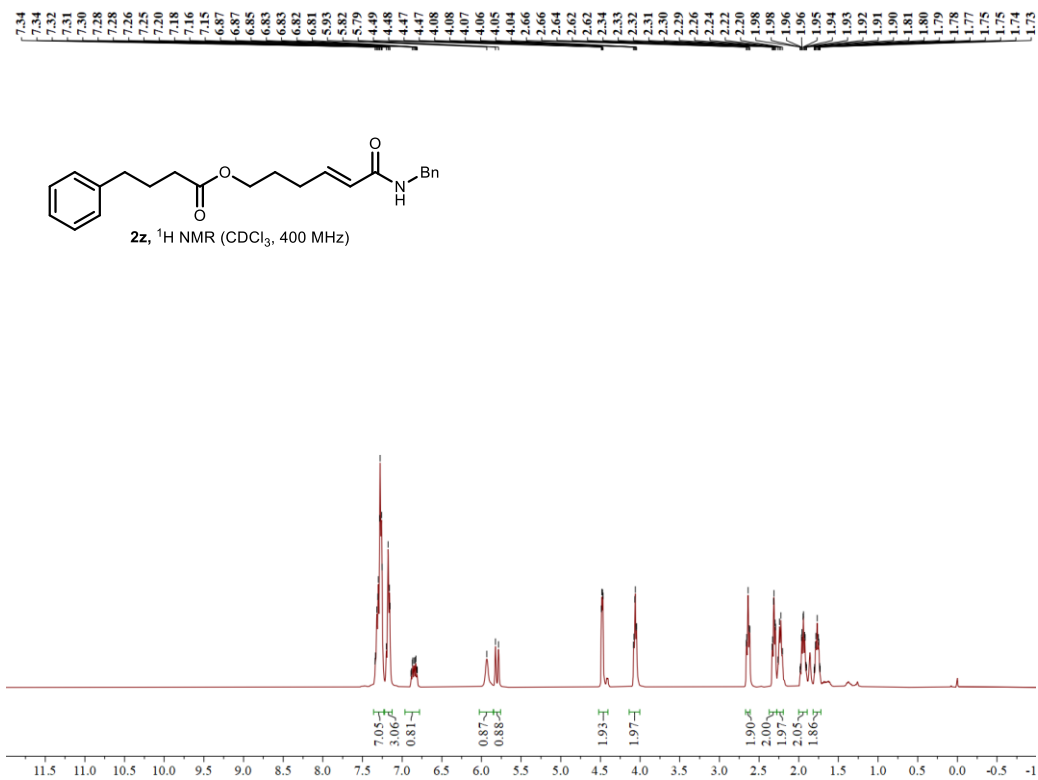

Figure S107.  $^1\text{H}$  NMR of **2z** ( $\text{CDCl}_3$ , 400 MHz)

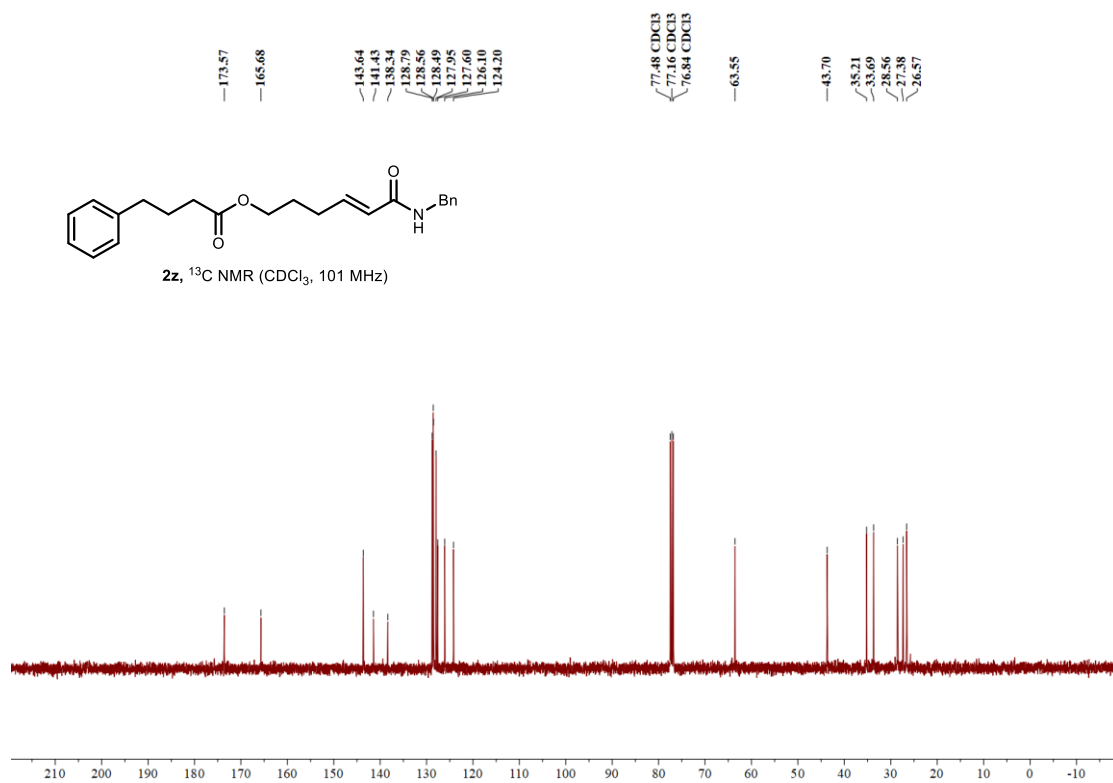

**Figure S108.**  $^{13}\text{C}$  NMR of **2z** ( $\text{CDCl}_3$ , 101 MHz)

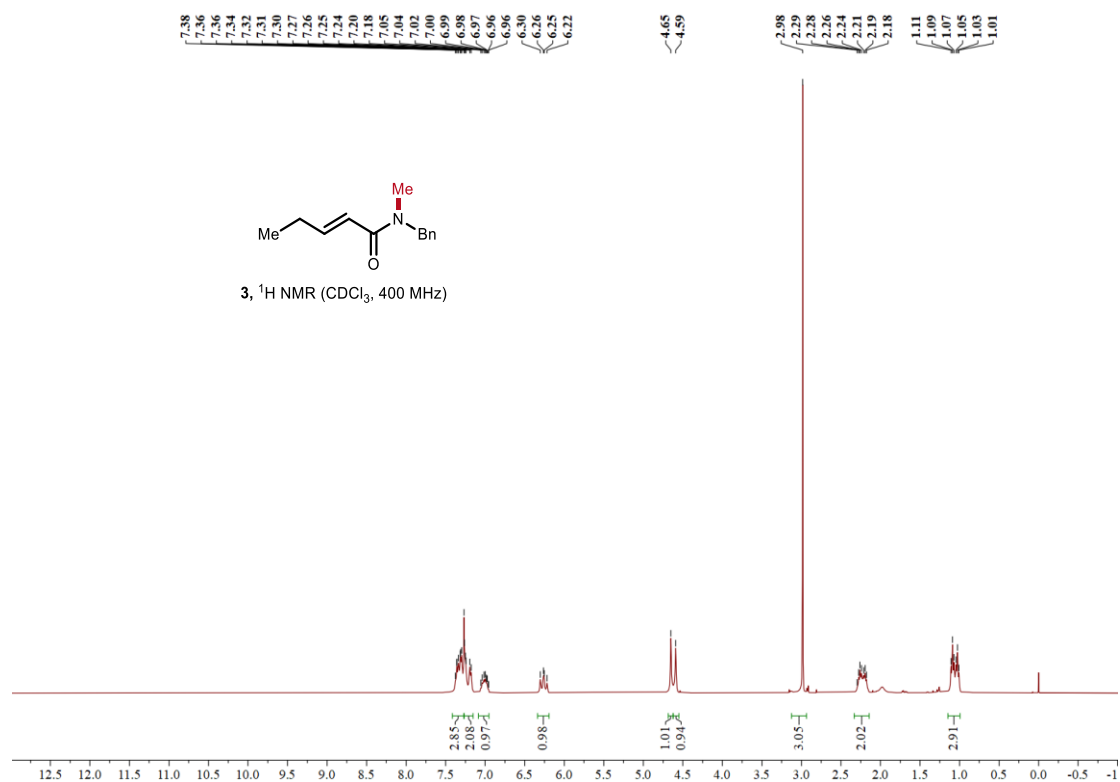

**Figure S109.**  $^1\text{H}$  NMR of **3** ( $\text{CDCl}_3$ , 400 MHz)

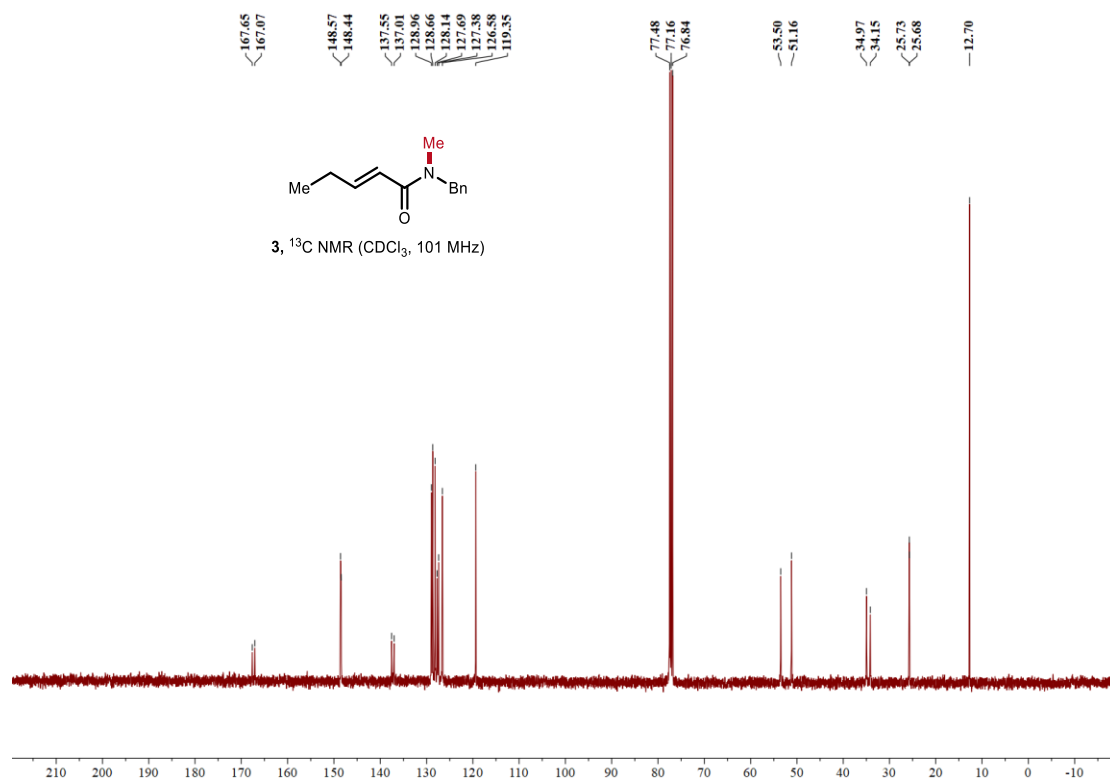

Figure S110. <sup>13</sup>C NMR of 3 (CDCl<sub>3</sub>, 151 MHz)

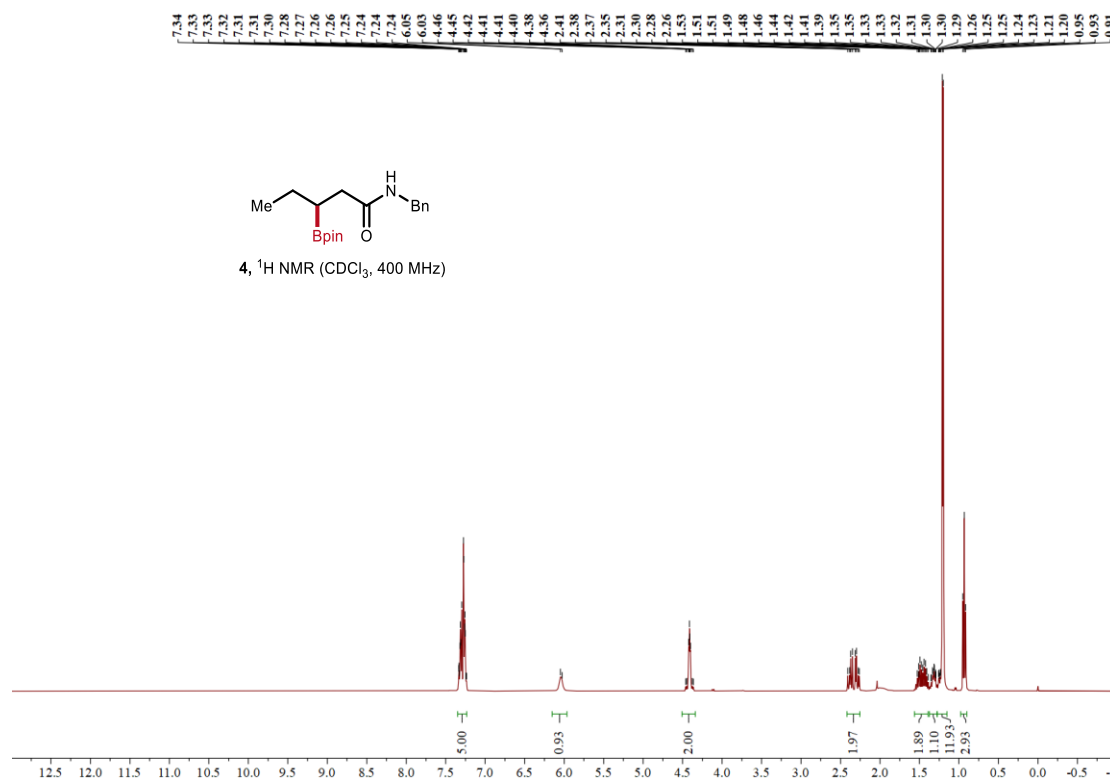

Figure S111. <sup>1</sup>H NMR of 4 (CDCl<sub>3</sub>, 400 MHz)

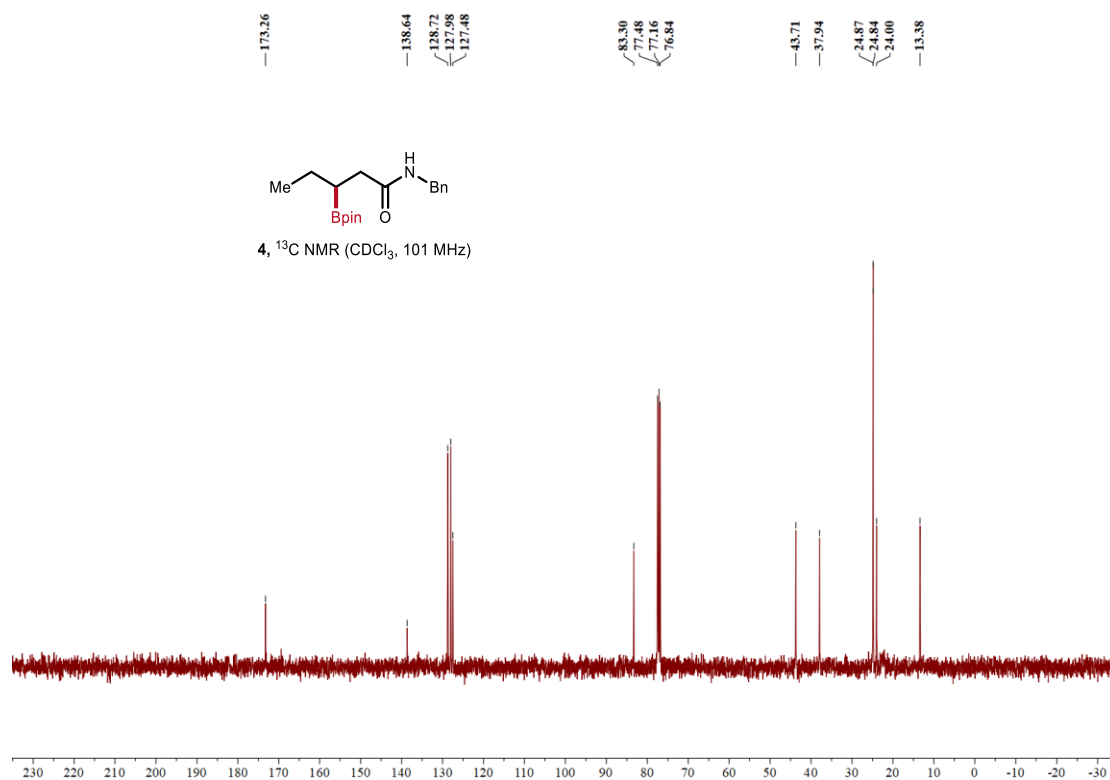

**Figure S112.**  $^{13}\text{C}$  NMR of **4** ( $\text{CDCl}_3$ , 101 MHz)

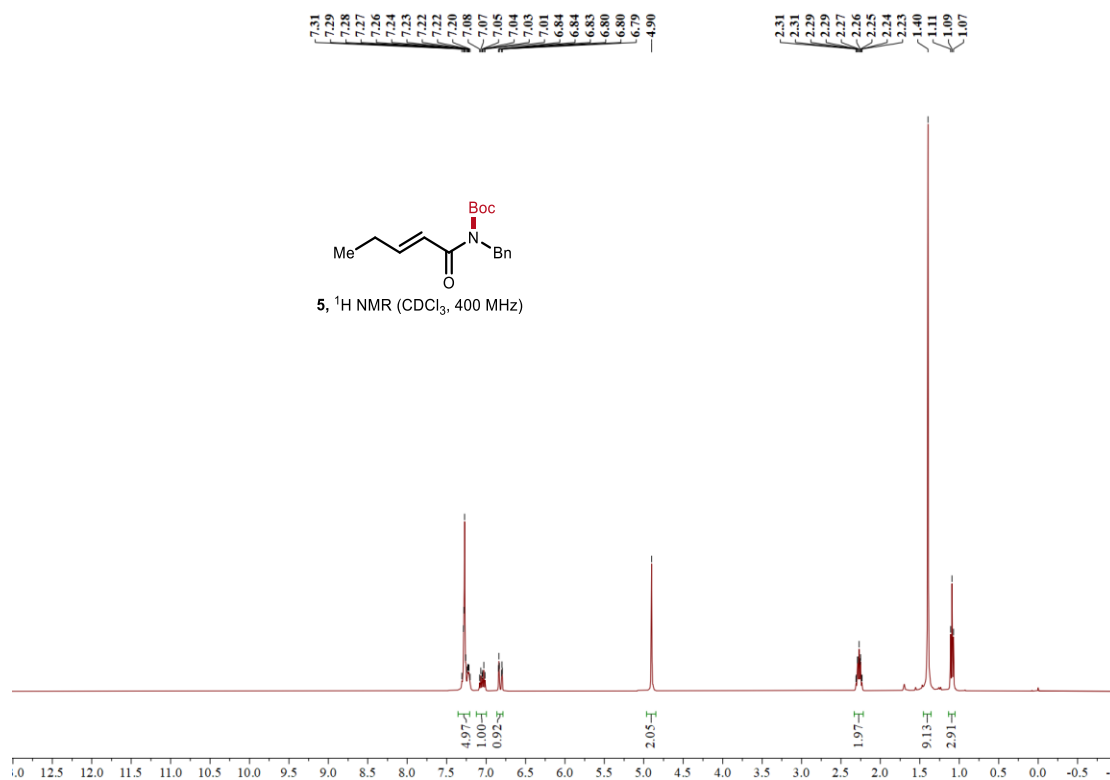

**Figure S113.**  $^1\text{H}$  NMR of **5** ( $\text{CDCl}_3$ , 400 MHz)

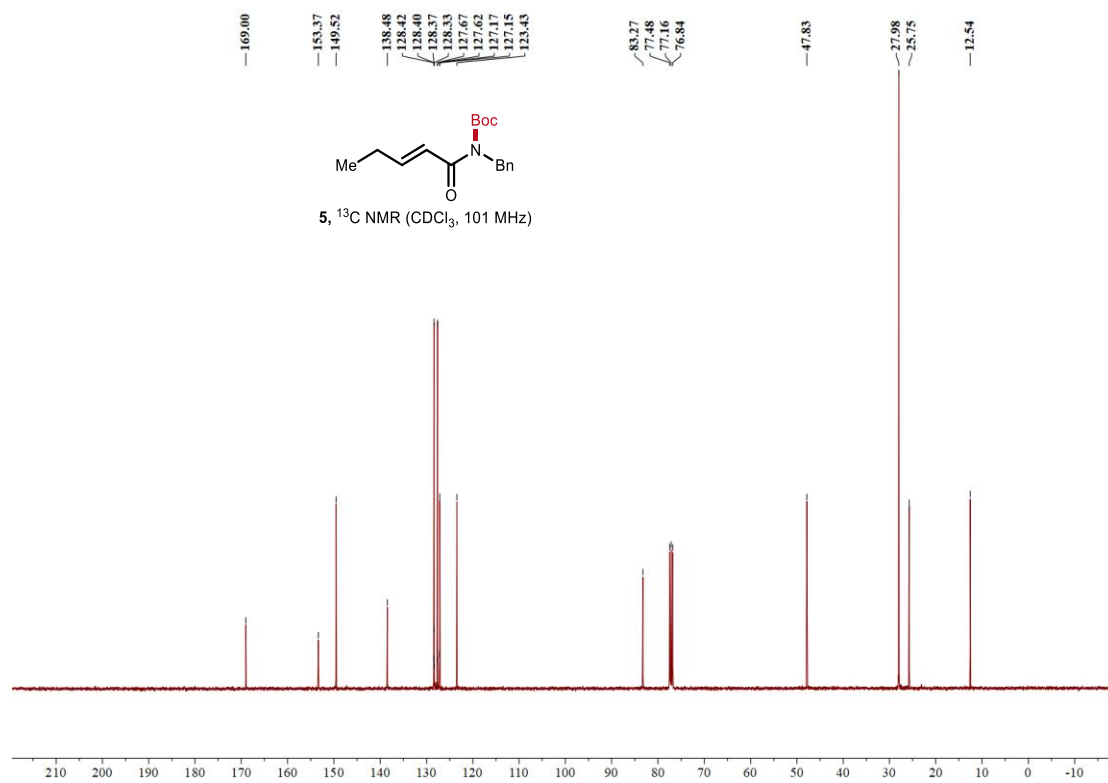

**Figure S114.**  $^{13}\text{C}$  NMR of **5** ( $\text{CDCl}_3$ , 101 MHz)

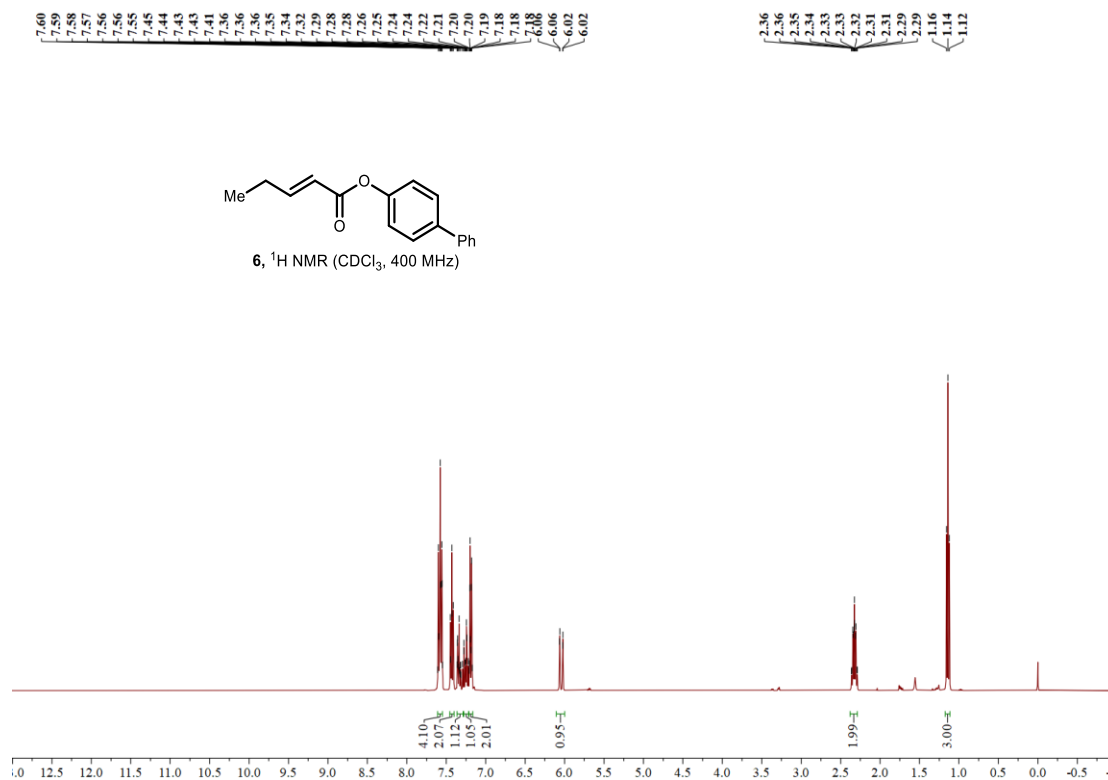

**Figure S115.**  $^1\text{H}$  NMR of **6** ( $\text{CDCl}_3$ , 400 MHz)

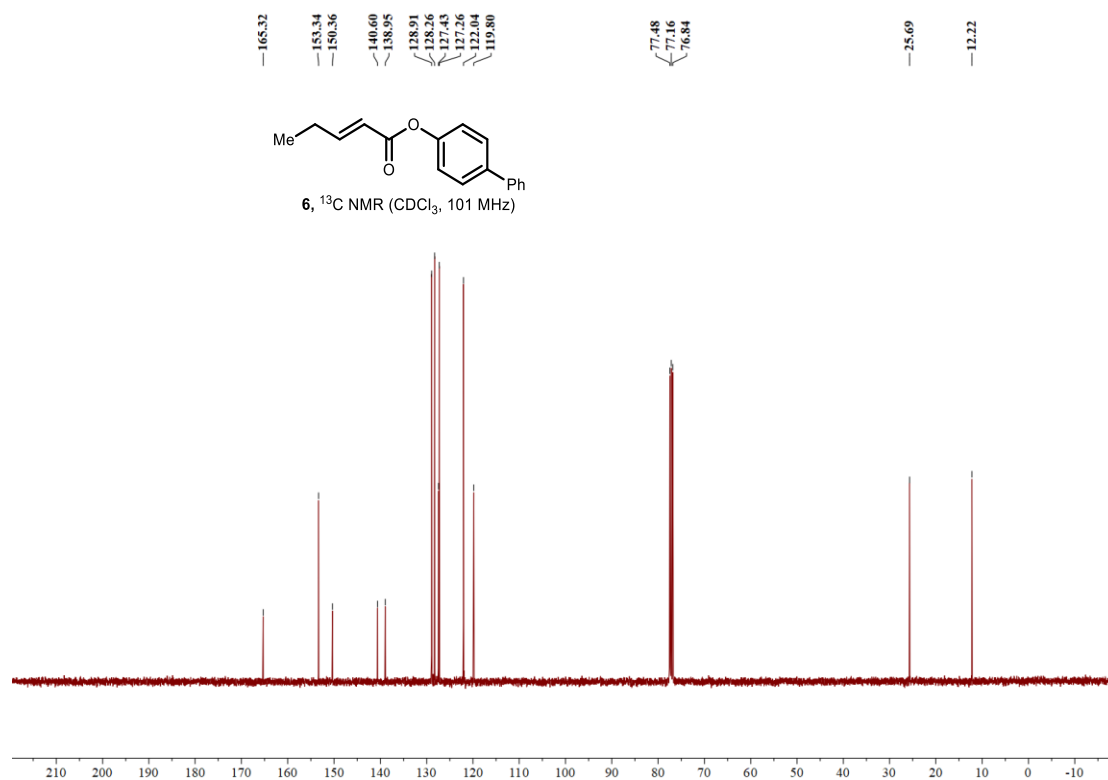

**Figure S116.**  $^{13}\text{C}$  NMR of **6** ( $\text{CDCl}_3$ , 101 MHz)

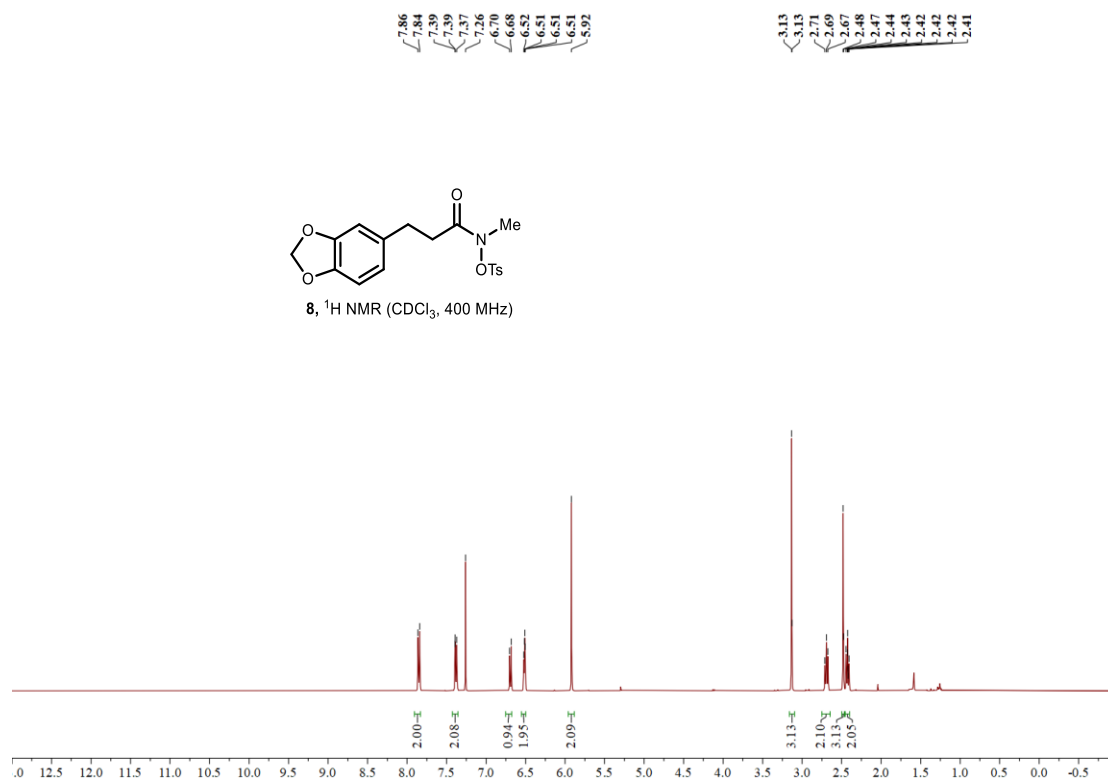

**Figure S117.**  $^1\text{H}$  NMR of **8** ( $\text{CDCl}_3$ , 400 MHz)

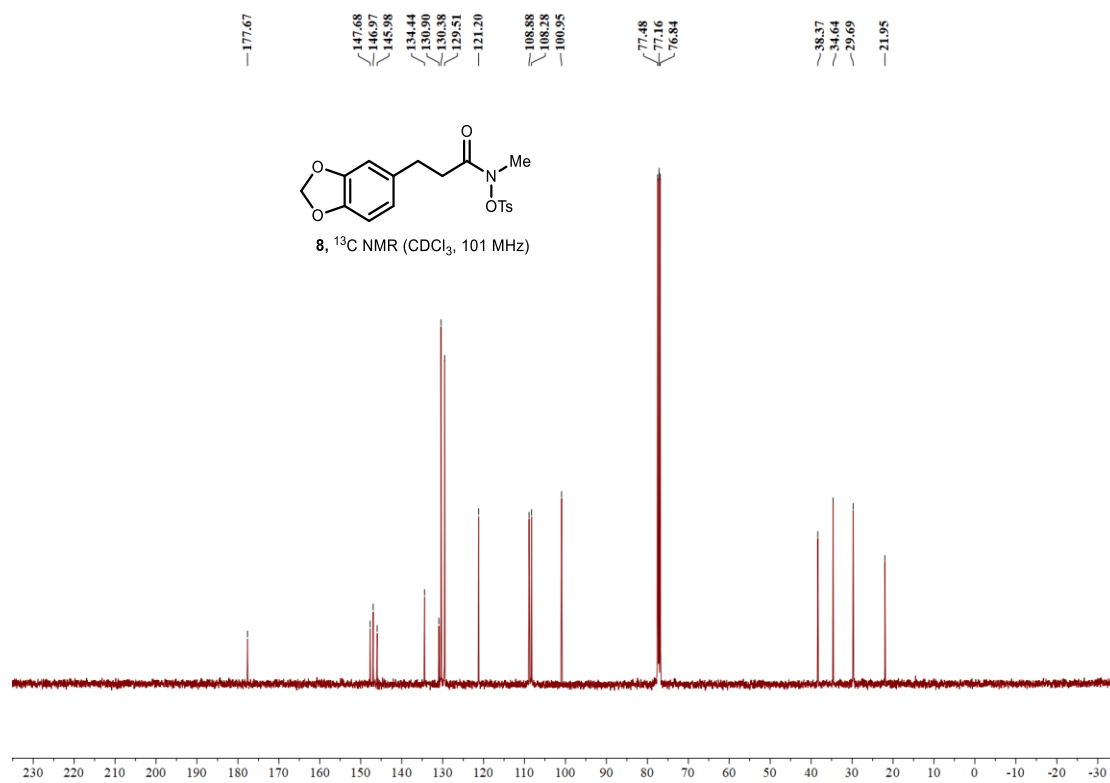

**Figure S118.**  $^{13}\text{C}$  NMR of **8** ( $\text{CDCl}_3$ , 101 MHz)

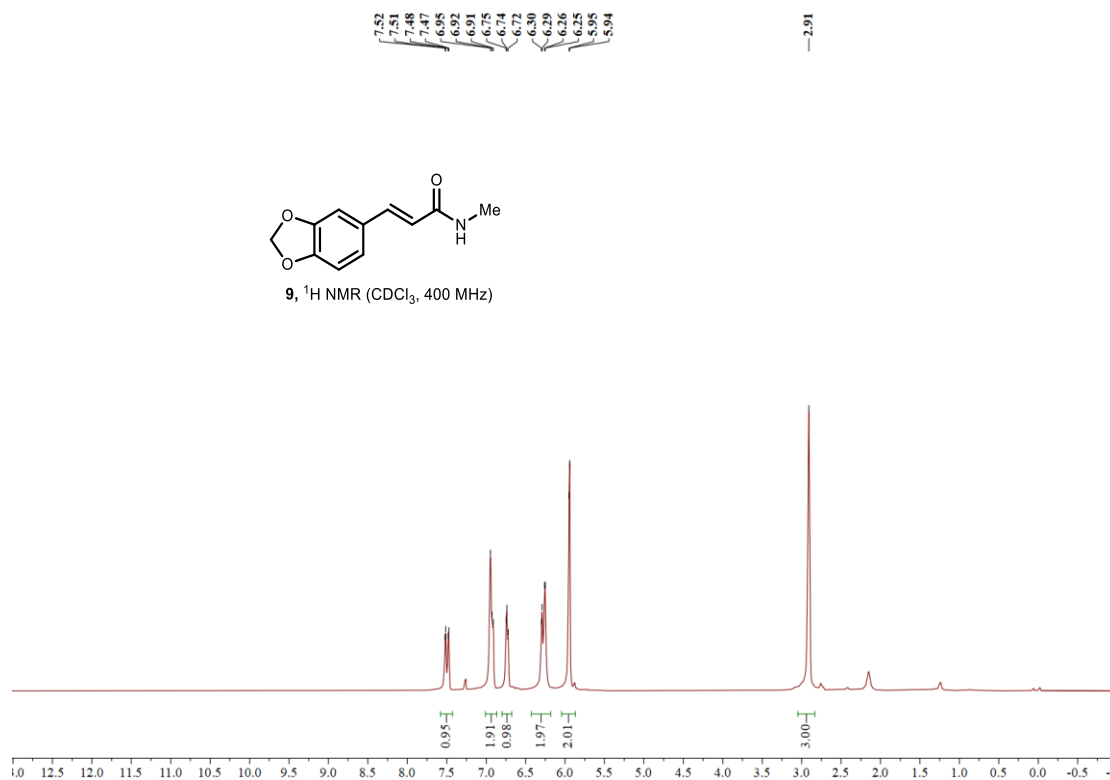

**Figure S119.**  $^1\text{H}$  NMR of **9** ( $\text{CDCl}_3$ , 400 MHz)



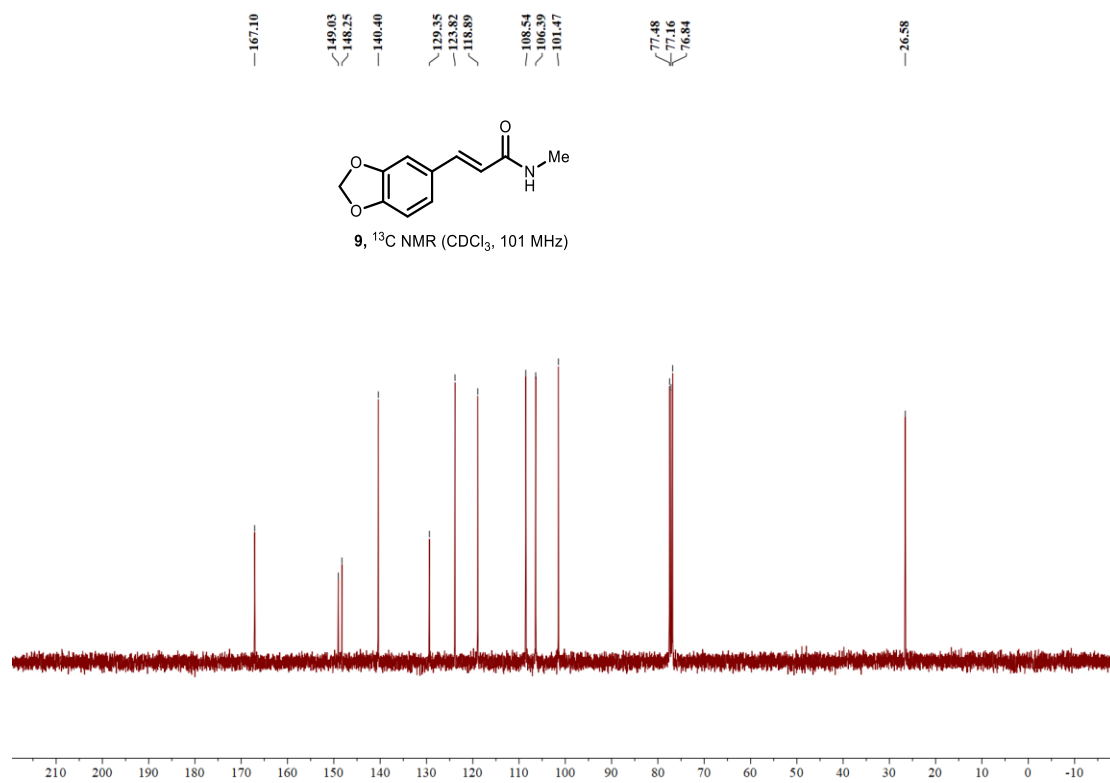

**Figure S120.**  $^{13}\text{C}$  NMR of **9** ( $\text{CDCl}_3$ , 101 MHz)

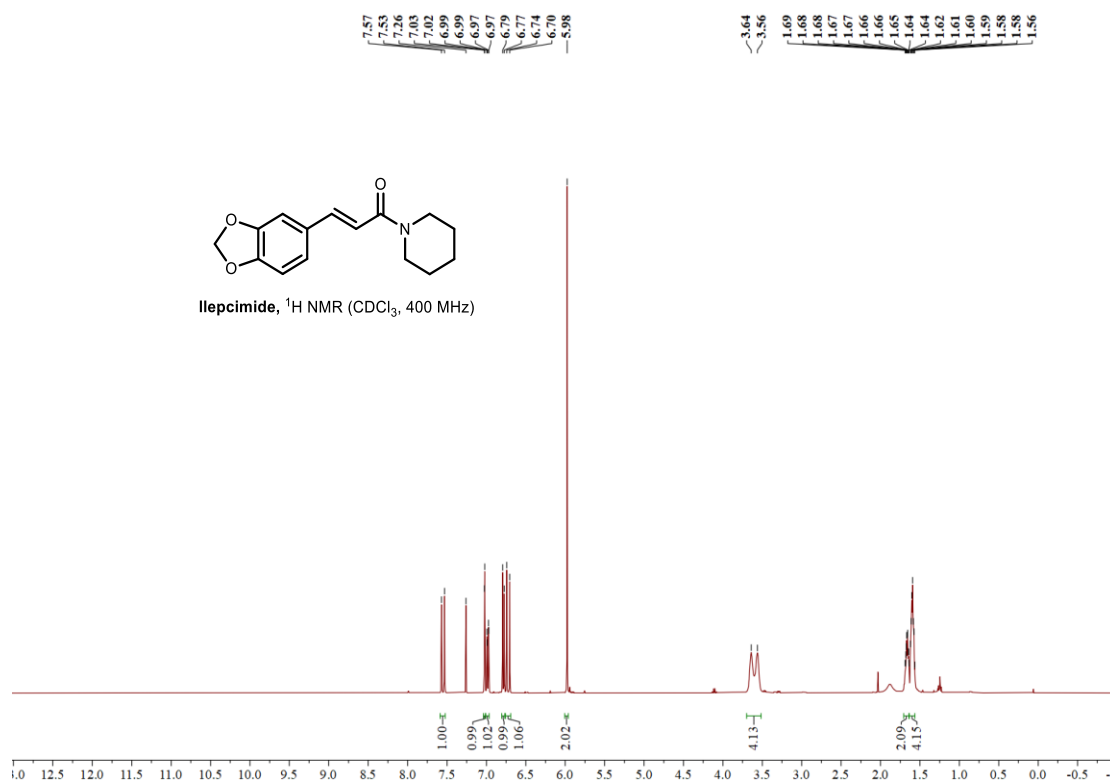

**Figure S121.**  $^1\text{H}$  NMR of **llepcimide** ( $\text{CDCl}_3$ , 400 MHz)

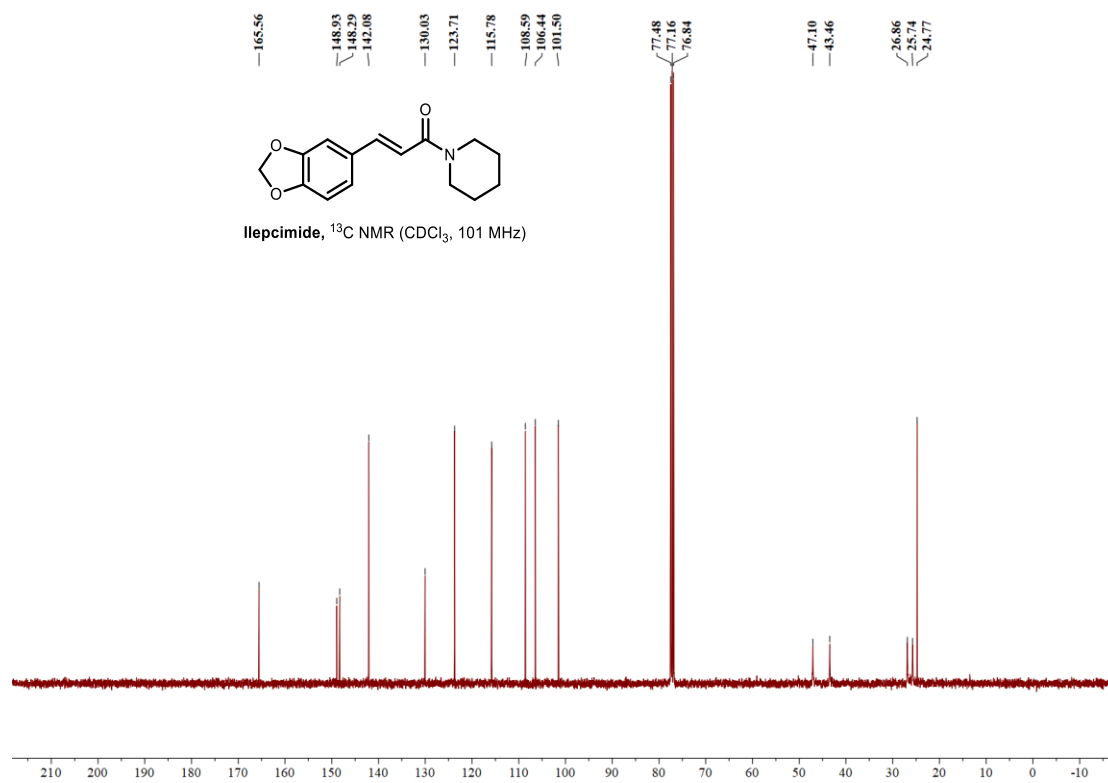

**Figure S12.**  $^{13}\text{C}$  NMR of llepicimide ( $\text{CDCl}_3$ , 101 MHz)

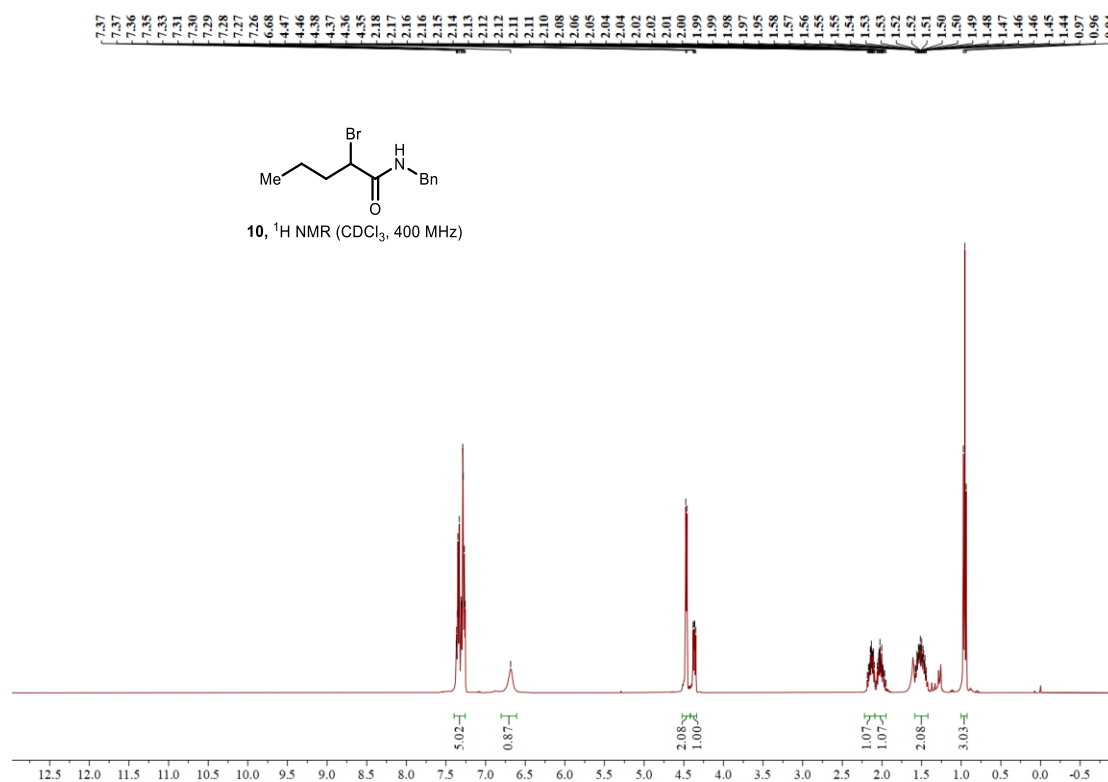

**Figure S13.**  $^1\text{H}$  NMR of **10** ( $\text{CDCl}_3$ , 400 MHz)

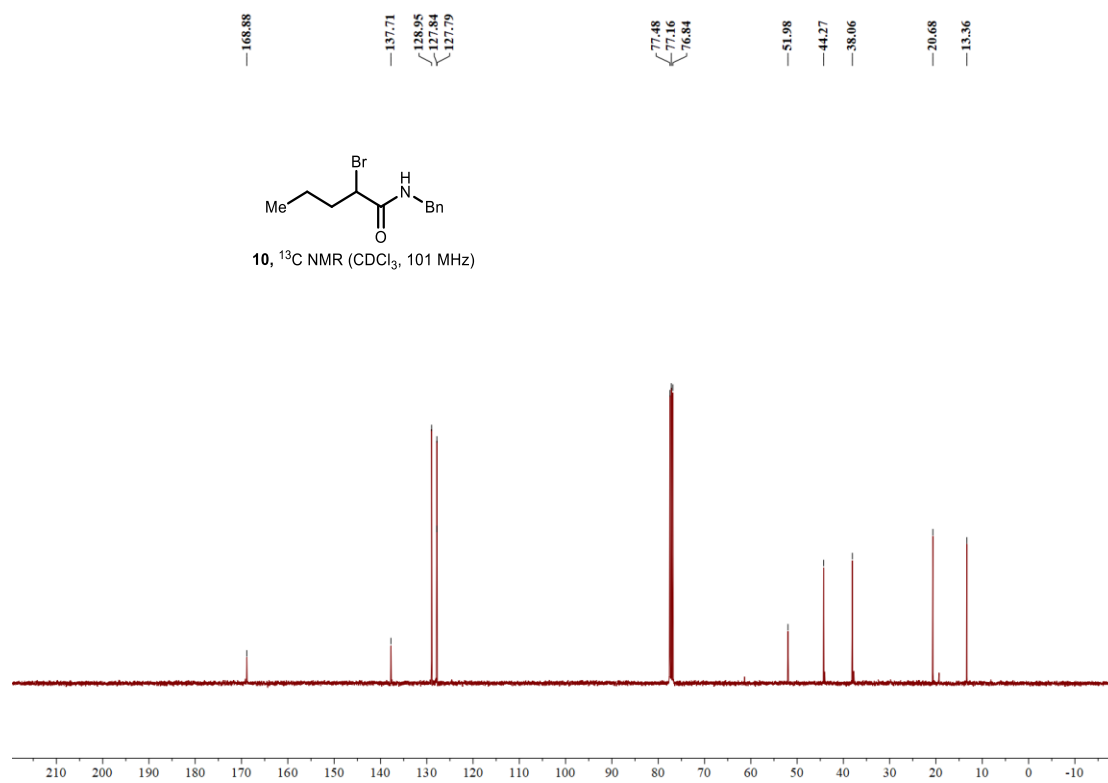

**Figure S124.**  $^{13}\text{C}$  NMR of **10** ( $\text{CDCl}_3$ , 101 MHz)

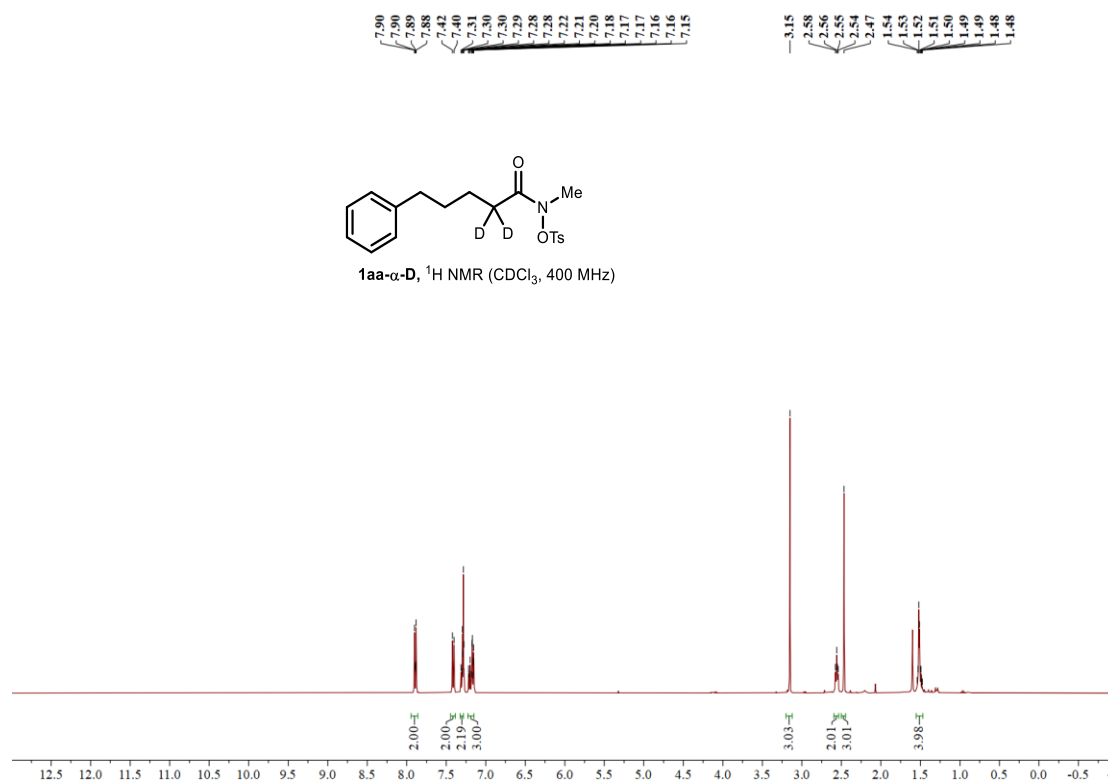

**Figure S125.**  $^1\text{H}$  NMR of **1aa- $\alpha$ -D** ( $\text{CDCl}_3$ , 400 MHz)

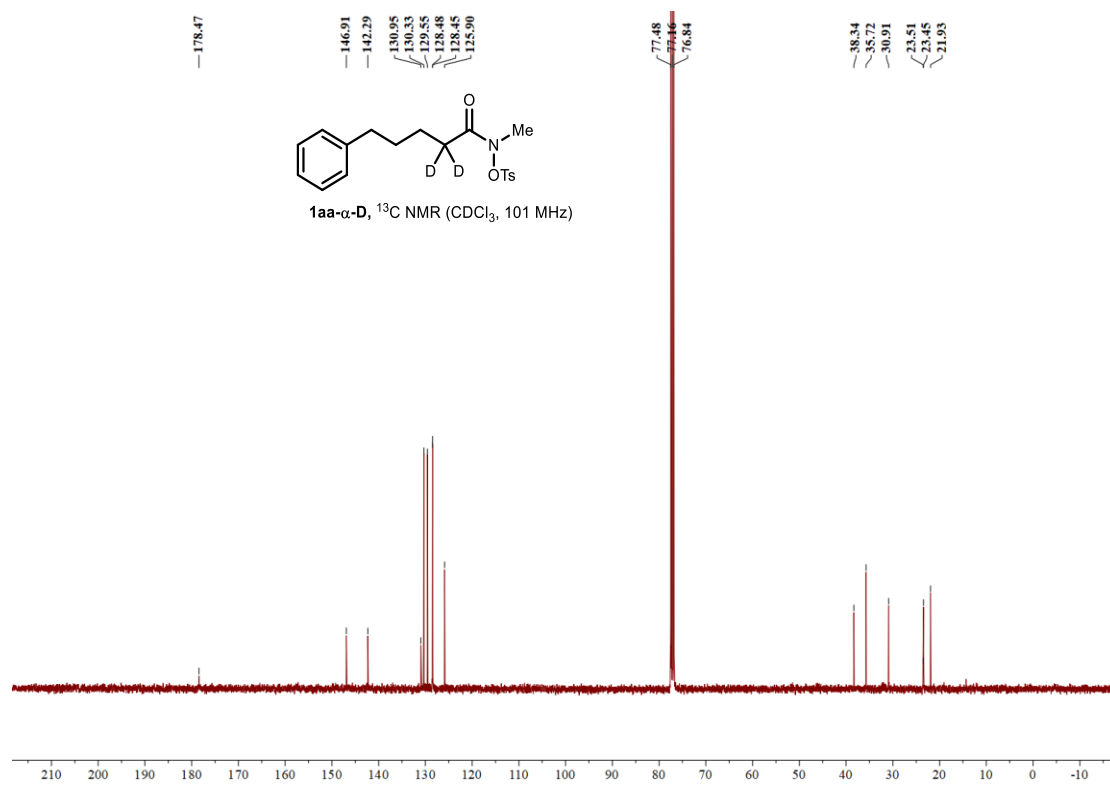

**Figure S126.**  $^{13}\text{C}$  NMR of **1aa- $\alpha$ -D** ( $\text{CDCl}_3$ , 101 MHz)

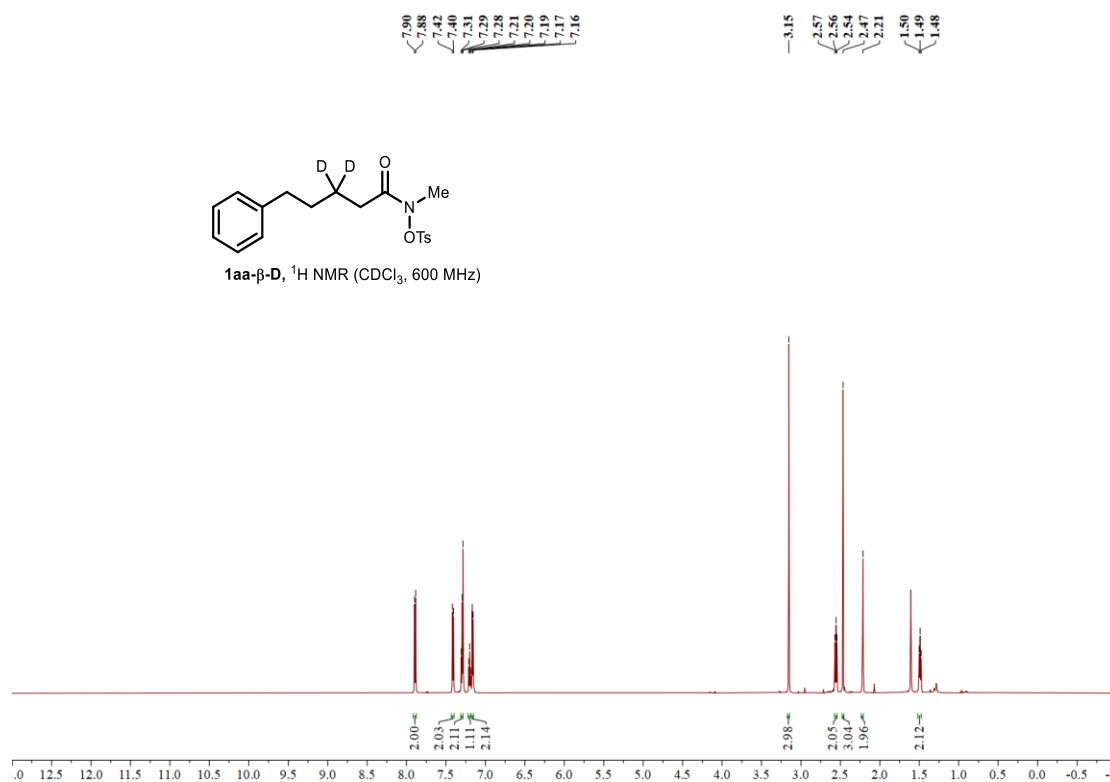

**Figure S127.**  $^1\text{H}$  NMR of **1aa- $\beta$ -D** ( $\text{CDCl}_3$ , 600 MHz)

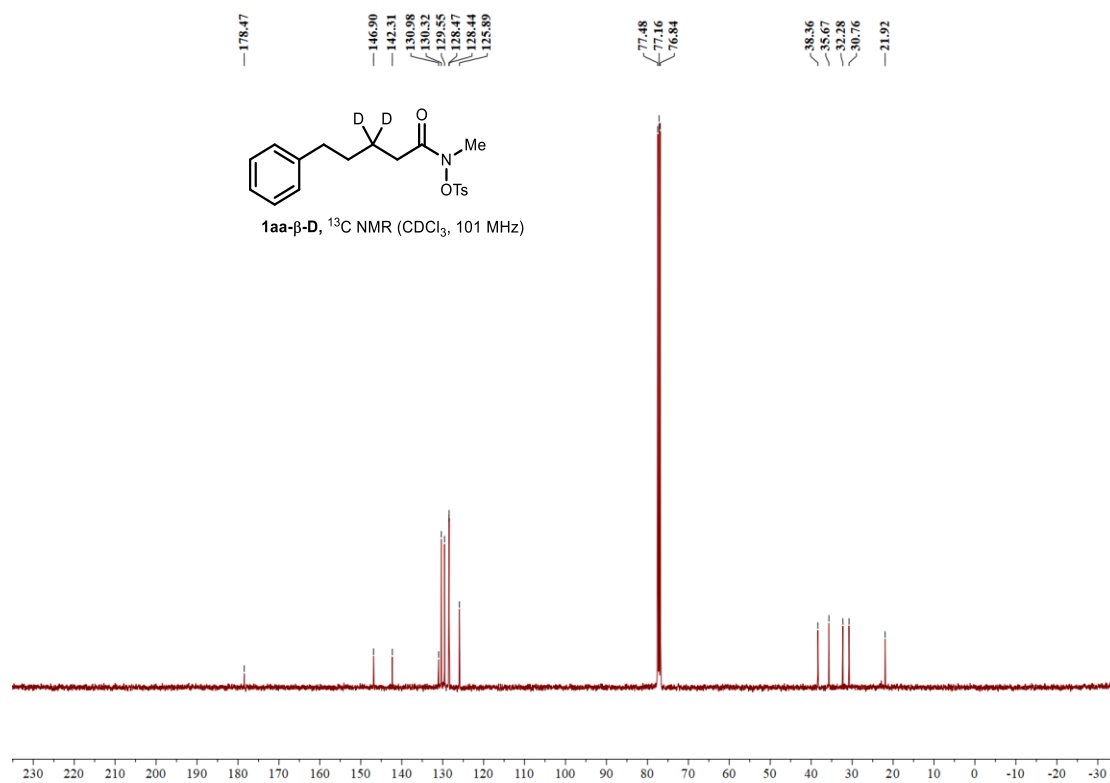

**Figure S128.** <sup>13</sup>C NMR of **1aa-β-D** (CDCl<sub>3</sub>, 101 MHz)

## 12. References

1. Hoffman, R. V.; Nayyar, N. K.; Chen, W.,  $\alpha$ -Lactam intermediates in base-promoted reactions of O-sulfonylated hydroxamic acids with nucleophiles. *Journal of the American Chemical Society* **1993**, *115* (12), 5031-5034.
2. Banerjee, A.; Yamamoto, H., Direct N–O bond formation via oxidation of amines with benzoyl peroxide. *Chemical Science* **2019**, *10* (7), 2124-2129.
3. Chea, H.; Sim, H.-S.; Yun, J., Copper-Catalyzed Conjugate Addition of Diboron Reagents to  $\alpha,\beta$ -Unsaturated Amides: Highly Reactive Copper-1,2- Bis(diphenylphosphino)benzene Catalyst System. *Advanced Synthesis & Catalysis* **2009**, *351* (6), 855-858.
4. Danfeng Ye, H. C., Zhiyuan Liu, Chuanhu Lei, Transamidation of N-Benzyl-N-Boc-amides under Transition Metal-Free and Base-Free Conditions. *Chinese Journal of Organic Chemistry*, **2021**, *41* (4), 1658-1669.
5. Barde, E.; Guérinot, A.; Cossy, J., Cobalt-Catalyzed Cross-Coupling of  $\alpha$ -Bromo Amides with Grignard Reagents. *Organic Letters* **2017**, *19* (22), 6068-6071.
6. Yang, S.; Fan, H.; Xie, L.; Dong, G.; Chen, M., Photoinduced Desaturation of Amides by Palladium Catalysis. *Organic Letters* **2022**, *24* (35), 6460-6465.
7. Wang, Z.; He, Z.; Zhang, L.; Huang, Y., Iridium-Catalyzed Aerobic  $\alpha,\beta$ -Dehydrogenation of  $\gamma,\delta$ -Unsaturated Amides and Acids: Activation of Both  $\alpha$ - and  $\beta$ -C–H bonds through an Allyl-Iridium Intermediate. *Journal of the American Chemical Society* **2018**, *140* (2), 735-740.
